# Supplementary material for: Essential Gene Profiles in Breast, Pancreatic, and Ovarian Cancer Cells
Source: Oxford University Press journal article supplement (doi:10.1158/2159-8290.cd-11-0224), 2011-12-29
Supplement: 21598290cd110224-sup-stab_1_xls_6921k.xls [file 21598290cd110224-sup-stab_1_xls_6921k.xls]

## Sheet: STable1
Supplemental Table 1: 78k library contents
CLONE_ID	TRPS_ID	SEQ	CLONE_NAME	REGION	REFSEQ	GENE_ID	GENE_SYMBOL	GENE_NAME
TRCN0000000001	TRPS0000194688	CCCTGCCAAACAAGCTAATAT	NM_001356.x-2866s1c1	3UTR	NM_001356	1654	DDX3X	DEAD (Asp-Glu-Ala-Asp) box polypeptide 3, X-linked
TRCN0000000002	TRPS0000082764	CGGAGTGATTACGATGGCATT	NM_001356.x-1157s1c1	CDS	NM_001356	1654	DDX3X	DEAD (Asp-Glu-Ala-Asp) box polypeptide 3, X-linked
TRCN0000000003	TRPS0000094998	CGTAGAATAGTCGAACAAGAT	NM_001356.x-1940s1c1	CDS	NM_001356	1654	DDX3X	DEAD (Asp-Glu-Ala-Asp) box polypeptide 3, X-linked
TRCN0000000004	TRPS0000054161	CGCTTGGAACAGGAACTCTTT	NM_001356.x-1289s1c1	CDS	NM_001356	1654	DDX3X	DEAD (Asp-Glu-Ala-Asp) box polypeptide 3, X-linked
TRCN0000000005	TRPS0000003336	AGCAGATTTAGTGGAGGGTTT	NM_001356.x-2627s1c1	CDS	NM_001356	1654	DDX3X	DEAD (Asp-Glu-Ala-Asp) box polypeptide 3, X-linked
TRCN0000000006	TRPS0000243593	GTTGGTTCGATAATGGCCTTT	NM_001358.x-2632s1c1	3UTR	NM_001358	1665	DHX15	DEAH (Asp-Glu-Ala-His) box polypeptide 15
TRCN0000000007	TRPS0000011035	ACTGTTCTAATGAGGTCCTAT	NM_001358.x-1906s1c1	CDS	NM_001358	1665	DHX15	DEAH (Asp-Glu-Ala-His) box polypeptide 15
TRCN0000000008	TRPS0000022221	TGGGAATACAAGGATAGGTTT	NM_001358.x-579s1c1	CDS	NM_001358	1665	DHX15	DEAH (Asp-Glu-Ala-His) box polypeptide 15
TRCN0000000009	TRPS0000038359	TGTAAGAGAATAAAGCGTGAA	NM_001358.x-1257s1c1	CDS	NM_001358	1665	DHX15	DEAH (Asp-Glu-Ala-His) box polypeptide 15
TRCN0000000010	TRPS0000263791	GCTTCAACAAATGCTATGCTT	NM_001358.x-348s1c1	CDS	NM_001358	1665	DHX15	DEAH (Asp-Glu-Ala-His) box polypeptide 15
TRCN0000000011	TRPS0000121307	CCAAGGGTAGGTGTCTCATTT	NM_003089.x-1582s1c1	3UTR	NM_003089	6625	SNRNP70	small nuclear ribonucleoprotein 70kDa (U1)
TRCN0000000012	TRPS0000030715	TCCGCTTACAAACACGCAGAT	NM_003089.x-646s1c1	CDS	NM_003089	6625	SNRNP70	small nuclear ribonucleoprotein 70kDa (U1)
TRCN0000000013	TRPS0000375555	GCGCCGTACATTCGAGAGTTT	NM_003089.x-295s1c1	CDS	NM_003089	6625	SNRNP70	small nuclear ribonucleoprotein 70kDa (U1)
TRCN0000000014	TRPS0000117045	CCGGAGAGAGTTTGAGGTGTA	NM_003089.x-528s1c1	CDS	NM_003089	6625	SNRNP70	small nuclear ribonucleoprotein 70kDa (U1)
TRCN0000000015	TRPS0000251863	GACATGCACTCCGCTTACAAA	NM_003089.x-637s1c1	CDS	NM_003089	6625	SNRNP70	small nuclear ribonucleoprotein 70kDa (U1)
TRCN0000000016	TRPS0000310201	GATCTGTGTATGGTGTGTTAA	NM_003675.x-1102s1c1	3UTR	NM_003675	8559	PRPF18	PRP18 pre-mRNA processing factor 18 homolog (S. cerevisiae)
TRCN0000000017	TRPS0000255646	GAGGAGAACCAATCAGACTAT	NM_003675.x-344s1c1	CDS	NM_003675	8559	PRPF18	PRP18 pre-mRNA processing factor 18 homolog (S. cerevisiae)
TRCN0000000018	TRPS0000317610	GACTATTTGGAGAGACTGATT	NM_003675.x-359s1c1	CDS	NM_003675	8559	PRPF18	PRP18 pre-mRNA processing factor 18 homolog (S. cerevisiae)
TRCN0000000019	TRPS0000246908	GAATACGTGAAGGCAAATGAT	NM_003675.x-853s1c1	CDS	NM_003675	8559	PRPF18	PRP18 pre-mRNA processing factor 18 homolog (S. cerevisiae)
TRCN0000000020	TRPS0000349538	GCCAGCAGTATTCTTCAGTAA	NM_004660.x-4242s1c1	3UTR	NM_004660	8653	DDX3Y	DEAD (Asp-Glu-Ala-Asp) box polypeptide 3, Y-linked
TRCN0000000021	TRPS0000002603	AGCGATATTGACATGGGAGAA	NM_004660.x-612s1c1	CDS	NM_004660	8653	DDX3Y	DEAD (Asp-Glu-Ala-Asp) box polypeptide 3, Y-linked
TRCN0000000022	TRPS0000035234	TAGGTGCAACAGGGAGTGATT	NM_004660.x-1369s1c1	CDS	NM_004660	8653	DDX3Y	DEAD (Asp-Glu-Ala-Asp) box polypeptide 3, Y-linked
TRCN0000000023	TRPS0000013505	AGGAGCAAGTACAGCGAGCAA	NM_004660.x-155s1c1	CDS	NM_004660	8653	DDX3Y	DEAD (Asp-Glu-Ala-Asp) box polypeptide 3, Y-linked
TRCN0000000024	TRPS0000384588	GCGATATTGACATGGGAGAAA	NM_004660.x-613s1c1	CDS	NM_004660	8653	DDX3Y	DEAD (Asp-Glu-Ala-Asp) box polypeptide 3, Y-linked
TRCN0000000025	TRPS0000295408	GACCCAACTAAGCTAAGCAAA	NM_004941.x-3626s1c1	CDS	NM_004941	1659	DHX8	DEAH (Asp-Glu-Ala-His) box polypeptide 8
TRCN0000000026	TRPS0000005805	AGACAGAGATAGGGAACGAAA	NM_004941.x-631s1c1	CDS	NM_004941	1659	DHX8	DEAH (Asp-Glu-Ala-His) box polypeptide 8
TRCN0000000027	TRPS0000152314	CCACCAATATCGCAGAGACAT	NM_004941.x-2586s1c1	CDS	NM_004941	1659	DHX8	DEAH (Asp-Glu-Ala-His) box polypeptide 8
TRCN0000000028	TRPS0000196415	CCTGCCCATCTACAAACTGAA	NM_004941.x-1765s1c1	CDS	NM_004941	1659	DHX8	DEAH (Asp-Glu-Ala-His) box polypeptide 8
TRCN0000000029	TRPS0000025229	TGATAAGAGGTCCACTGGTTT	NM_005131.x-2046s1c1	3UTR	NM_005131	9984	THOC1	THO complex 1
TRCN0000000030	TRPS0000029872	TGACGGGAAATGAGGAGTTAA	NM_005131.x-1309s1c1	CDS	NM_005131	9984	THOC1	THO complex 1
TRCN0000000031	TRPS0000008622	AGACTCAGAAATTAGGCAGAT	NM_005131.x-1799s1c1	CDS	NM_005131	9984	THOC1	THO complex 1
TRCN0000000032	TRPS0000386579	GTATGTGCAATGATCTCCTAA	NM_005131.x-427s1c1	CDS	NM_005131	9984	THOC1	THO complex 1
TRCN0000000033	TRPS0000012288	AGATACCAAACCTACGAGAAT	NM_005131.x-1229s1c1	CDS	NM_005131	9984	THOC1	THO complex 1
TRCN0000000034	TRPS0000027787	TGCATTGACTACCAGATTTAT	NM_005243.x-2035s1c1	3UTR	NM_005243	2130	EWSR1	Ewing sarcoma breakpoint region 1
TRCN0000000035	TRPS0000085161	CAACAAAGCTATGGAACCTAT	NM_005243.x-155s1c1	CDS	NM_005243	2130	EWSR1	Ewing sarcoma breakpoint region 1
TRCN0000000036	TRPS0000299448	GACCGCCTATGCAACTTCTTA	NM_005243.x-232s1c1	CDS	NM_005243	2130	EWSR1	Ewing sarcoma breakpoint region 1
TRCN0000000037	TRPS0000208573	CAAGTCAATATAGCCAACAGA	NM_005243.x-795s1c1	CDS	NM_005243	2130	EWSR1	Ewing sarcoma breakpoint region 1
TRCN0000000038	TRPS0000305854	GCAACAAAGCTATGGAACCTA	NM_005243.x-154s1c1	CDS	NM_005243	2130	EWSR1	Ewing sarcoma breakpoint region 1
TRCN0000000039	TRPS0000126817	CCGTCCTATCACCGTATCTTA	NM_005850.x-558s1c1	CDS	NM_005850	10262	SF3B4	splicing factor 3b, subunit 4, 49kDa
TRCN0000000040	TRPS0000055515	CCCTGAGATTGATGAGAAGTT	NM_005850.x-375s1c1	CDS	NM_005850	10262	SF3B4	splicing factor 3b, subunit 4, 49kDa
TRCN0000000041	TRPS0000158294	CACCGTATCTTATGCCTTCAA	NM_005850.x-567s1c1	CDS	NM_005850	10262	SF3B4	splicing factor 3b, subunit 4, 49kDa
TRCN0000000042	TRPS0000094925	CGTCCTATCACCGTATCTTAT	NM_005850.x-559s1c1	CDS	NM_005850	10262	SF3B4	splicing factor 3b, subunit 4, 49kDa
TRCN0000000043	TRPS0000245463	GAAGCCAATACGGGTGAACAA	NM_005850.x-294s1c1	CDS	NM_005850	10262	SF3B4	splicing factor 3b, subunit 4, 49kDa
TRCN0000000044	TRPS0000376853	GTTCCCAAGTTAGTCAAGTAT	NM_006559.x-2443s1c1	3UTR	NM_006559	10657	KHDRBS1	KH domain containing, RNA binding, signal transduction associated 1
TRCN0000000045	TRPS0000241790	GTACCGGATATGATGGATGAT	NM_006559.x-872s1c1	CDS	NM_006559	10657	KHDRBS1	KH domain containing, RNA binding, signal transduction associated 1
TRCN0000000046	TRPS0000243890	GACGGCAGAAATTGAGAAGAT	NM_006559.x-481s1c1	CDS	NM_006559	10657	KHDRBS1	KH domain containing, RNA binding, signal transduction associated 1
TRCN0000000047	TRPS0000182062	CCACAAGGGAATACAATCAAA	NM_006559.x-641s1c1	CDS	NM_006559	10657	KHDRBS1	KH domain containing, RNA binding, signal transduction associated 1
TRCN0000000048	TRPS0000379074	GATGAGGAGAATTACTTGGAT	NM_006559.x-527s1c1	CDS	NM_006559	10657	KHDRBS1	KH domain containing, RNA binding, signal transduction associated 1
TRCN0000000049	TRPS0000361193	GAAGACCAGTAGGAAAGCAAA	NM_006711.x-1243s1c1	3UTR	NM_006711	10921	RNPS1	RNA binding protein S1, serine-rich domain
TRCN0000000050	TRPS0000038552	TGATTGACATGCCCGTGGAAA	NM_006711.x-817s1c1	CDS	NM_006711	10921	RNPS1	RNA binding protein S1, serine-rich domain
TRCN0000000051	TRPS0000029284	TCTGTCCAAAGGCTATGCGTA	NM_006711.x-851s1c1	CDS	NM_006711	10921	RNPS1	RNA binding protein S1, serine-rich domain
TRCN0000000052	TRPS0000074923	CAGCTCCAACTCCTCCCGATA	NM_006711.x-1148s1c1	CDS	NM_006711	10921	RNPS1	RNA binding protein S1, serine-rich domain
TRCN0000000053	TRPS0000193474	CGTAGAGTTTGAGAATCCAGA	NM_006711.x-872s1c1	CDS	NM_006711	10921	RNPS1	RNA binding protein S1, serine-rich domain
TRCN0000000054	TRPS0000193125	CATGTTCTCCAATCCCAGGTA	NM_006802.x-2486s1c1	3UTR	NM_006802	10946	SF3A3	splicing factor 3a, subunit 3, 60kDa
TRCN0000000055	TRPS0000032638	TGGCCTAAATATCAACTACAA	NM_006802.x-1208s1c1	CDS	NM_006802	10946	SF3A3	splicing factor 3a, subunit 3, 60kDa
TRCN0000000056	TRPS0000173883	CGAGACACTGAAAGGAACAAA	NM_006802.x-942s1c1	CDS	NM_006802	10946	SF3A3	splicing factor 3a, subunit 3, 60kDa
TRCN0000000057	TRPS0000199241	CTGAGGGATTTGTATGATGAT	NM_006802.x-177s1c1	CDS	NM_006802	10946	SF3A3	splicing factor 3a, subunit 3, 60kDa
TRCN0000000058	TRPS0000251377	GACTCAAGCAAATAAAGGAAT	NM_006802.x-268s1c1	CDS	NM_006802	10946	SF3A3	splicing factor 3a, subunit 3, 60kDa
TRCN0000000059	TRPS0000226428	CTGGGCTCCTATGAATGCAAA	NM_007165.x-243s1c1	CDS	NM_007165	8175	SF3A2	splicing factor 3a, subunit 2, 66kDa
TRCN0000000060	TRPS0000069646	CTACGAGACCATTGCCTTCAA	NM_007165.x-617s1c1	CDS	NM_007165	8175	SF3A2	splicing factor 3a, subunit 2, 66kDa
TRCN0000000061	TRPS0000140651	CCTGGGCTCCTATGAATGCAA	NM_007165.x-242s1c1	CDS	NM_007165	8175	SF3A2	splicing factor 3a, subunit 2, 66kDa
TRCN0000000062	TRPS0000098515	CAAAGTGACCAAGCAGAGAGA	NM_007165.x-443s1c1	CDS	NM_007165	8175	SF3A2	splicing factor 3a, subunit 2, 66kDa
TRCN0000000063	TRPS0000016202	ACATCAACAAGGACCCGTACT	NM_007165.x-208s1c1	CDS	NM_007165	8175	SF3A2	splicing factor 3a, subunit 2, 66kDa
TRCN0000000064	TRPS0000164683	CCTCAGCAGTTTATGGATTAT	NM_012311.x-216s1c1	CDS	NM_012311	22944	KIN	KIN, antigenic determinant of recA protein homolog (mouse)
TRCN0000000065	TRPS0000180337	CTCAGCAGTTTATGGATTATT	NM_012311.x-217s1c1	CDS	NM_012311	22944	KIN	KIN, antigenic determinant of recA protein homolog (mouse)
TRCN0000000066	TRPS0000109109	CAGCTACTATCGTCATTGAAA	NM_012311.x-1132s1c1	CDS	NM_012311	22944	KIN	KIN, antigenic determinant of recA protein homolog (mouse)
TRCN0000000067	TRPS0000084873	CTGTTGTGAAGATGATTGATT	NM_012311.x-976s1c1	CDS	NM_012311	22944	KIN	KIN, antigenic determinant of recA protein homolog (mouse)
TRCN0000000068	TRPS0000002567	AGGACGCAGAGTTGAAGGAAT	NM_012311.x-1166s1c1	CDS	NM_012311	22944	KIN	KIN, antigenic determinant of recA protein homolog (mouse)
TRCN0000000069	TRPS0000008693	AGGAGGGTGACTGGATAATTA	NM_012426.x-3898s1c1	3UTR	NM_012426	23450	SF3B3	splicing factor 3b, subunit 3, 130kDa
TRCN0000000070	TRPS0000011008	AGACAGATGAAGATATGGTTA	NM_012426.x-1103s1c1	CDS	NM_012426	23450	SF3B3	splicing factor 3b, subunit 3, 130kDa
TRCN0000000071	TRPS0000103202	CACTGGAATTTGCATCGGGTT	NM_012426.x-2369s1c1	CDS	NM_012426	23450	SF3B3	splicing factor 3b, subunit 3, 130kDa
TRCN0000000072	TRPS0000174106	CCTAACACCAATGATGAAGTA	NM_012426.x-3334s1c1	CDS	NM_012426	23450	SF3B3	splicing factor 3b, subunit 3, 130kDa
TRCN0000000073	TRPS0000298777	GTTGGAGTAGATGTCGGATTT	NM_012426.x-667s1c1	CDS	NM_012426	23450	SF3B3	splicing factor 3b, subunit 3, 130kDa
TRCN0000000074	TRPS0000030426	TGCTTTGATTTGGTGATGTAA	NM_012433.x-3966s1c1	3UTR	NM_012433	23451	SF3B1	splicing factor 3b, subunit 1, 155kDa
TRCN0000000075	TRPS0000011133	AGAAGAAATTACCGACAGTTA	NM_012433.x-2479s1c1	CDS	NM_012433	23451	SF3B1	splicing factor 3b, subunit 1, 155kDa
TRCN0000000076	TRPS0000132478	CGCTATTGATTGATGAAGATT	NM_012433.x-1739s1c1	CDS	NM_012433	23451	SF3B1	splicing factor 3b, subunit 1, 155kDa
TRCN0000000077	TRPS0000196935	CAACTCCTTATGGTATCGAAT	NM_012433.x-2147s1c1	CDS	NM_012433	23451	SF3B1	splicing factor 3b, subunit 1, 155kDa
TRCN0000000078	TRPS0000100968	CTGGGCATACTCCTTCCTTAA	NM_012433.x-671s1c1	CDS	NM_012433	23451	SF3B1	splicing factor 3b, subunit 1, 155kDa
TRCN0000000079	TRPS0000163356	CGATTGCTCCTGTGTAAAGAT	NM_003016.x-1513s1c1	3UTR	NM_003016	6427	SFRS2	splicing factor, arginine/serine-rich 2
TRCN0000000080	TRPS0000027191	TGGATTTGGATATTTGAGGTA	NM_003016.x-1066s1c1	3UTR	NM_003016	6427	SFRS2	splicing factor, arginine/serine-rich 2
TRCN0000000081	TRPS0000009453	AGTTGTGTAGCAGTTGAGTAA	NM_003016.x-1428s1c1	3UTR	NM_003016	6427	SFRS2	splicing factor, arginine/serine-rich 2
TRCN0000000082	TRPS0000016440	ACCACATAGTCCATCGAAGAA	NM_003016.x-872s1c1	3UTR	NM_003016	6427	SFRS2	splicing factor, arginine/serine-rich 2
TRCN0000000083	TRPS0000119182	CAGTTGTGTAGCAGTTGAGTA	NM_003016.x-1427s1c1	3UTR	NM_003016	6427	SFRS2	splicing factor, arginine/serine-rich 2
TRCN0000000084	TRPS0000026828	TCTCCCGATTGCTCCTGTGTA	NM_003016.x-1508s1c1	3UTR	NM_003016	6427	SFRS2	splicing factor, arginine/serine-rich 2
TRCN0000000085	TRPS0000300879	GTCGTGCAGAAACAAATGGCT	NM_003016.x-1539s1c1	3UTR	NM_003016	6427	SFRS2	splicing factor, arginine/serine-rich 2
TRCN0000000086	TRPS0000015821	ATGTATCGGCAAGCAGTGTAA	NM_003016.x-829s1c1	3UTR	NM_003016	6427	SFRS2	splicing factor, arginine/serine-rich 2
TRCN0000000087	TRPS0000008623	AGTCCATCGAAGAAGAGTCCT	NM_003016.x-879s1c1	3UTR	NM_003016	6427	SFRS2	splicing factor, arginine/serine-rich 2
TRCN0000000088	TRPS0000011923	AGGCGCAGTTGTGTAGCAGTT	NM_003016.x-1422s1c1	3UTR	NM_003016	6427	SFRS2	splicing factor, arginine/serine-rich 2
TRCN0000000089	TRPS0000177654	CACATAGTCCATCGAAGAAGA	NM_003016.x-874s1c1	3UTR	NM_003016	6427	SFRS2	splicing factor, arginine/serine-rich 2
TRCN0000000090	TRPS0000201560	CATAGTCCATCGAAGAAGAGT	NM_003016.x-876s1c1	3UTR	NM_003016	6427	SFRS2	splicing factor, arginine/serine-rich 2
TRCN0000000091	TRPS0000175720	CGACTTCAGATTTCATTATTG	NM_003016.x-1047s1c1	3UTR	NM_003016	6427	SFRS2	splicing factor, arginine/serine-rich 2
TRCN0000000092	TRPS0000181489	CGGGCCTTGCATATAAATAAC	NM_003016.x-1603s1c1	3UTR	NM_003016	6427	SFRS2	splicing factor, arginine/serine-rich 2
TRCN0000000093	TRPS0000070875	CCGATTGCTCCTGTGTAAAGA	NM_003016.x-1512s1c1	3UTR	NM_003016	6427	SFRS2	splicing factor, arginine/serine-rich 2
TRCN0000000094	TRPS0000013661	ACATAGTCCATCGAAGAAGAG	NM_003016.x-875s1c1	3UTR	NM_003016	6427	SFRS2	splicing factor, arginine/serine-rich 2
TRCN0000000095	TRPS0000024125	TCGGCAAGCAGTGTAAACGGA	NM_003016.x-834s1c1	3UTR	NM_003016	6427	SFRS2	splicing factor, arginine/serine-rich 2
TRCN0000000096	TRPS0000348996	GTATCGGCAAGCAGTGTAAAC	NM_003016.x-831s1c1	3UTR	NM_003016	6427	SFRS2	splicing factor, arginine/serine-rich 2
TRCN0000000097	TRPS0000071785	CGGCAAGCAGTGTAAACGGAG	NM_003016.x-835s1c1	3UTR	NM_003016	6427	SFRS2	splicing factor, arginine/serine-rich 2
TRCN0000000098	TRPS0000242002	GAGTGCTTGGCTGTTTCCTGT	NM_003016.x-1485s1c1	3UTR	NM_003016	6427	SFRS2	splicing factor, arginine/serine-rich 2
TRCN0000000099	TRPS0000129773	CCACATAGTCCATCGAAGAAG	NM_003016.x-873s1c1	3UTR	NM_003016	6427	SFRS2	splicing factor, arginine/serine-rich 2
TRCN0000000100	TRPS0000025534	TAGTCCATCGAAGAAGAGTCC	NM_003016.x-878s1c1	3UTR	NM_003016	6427	SFRS2	splicing factor, arginine/serine-rich 2
TRCN0000000101	TRPS0000008621	ATAGTCCATCGAAGAAGAGTC	NM_003016.x-877s1c1	3UTR	NM_003016	6427	SFRS2	splicing factor, arginine/serine-rich 2
TRCN0000000102	TRPS0000134300	CCCGATTGCTCCTGTGTAAAG	NM_003016.x-1511s1c1	3UTR	NM_003016	6427	SFRS2	splicing factor, arginine/serine-rich 2
TRCN0000000103	TRPS0000266300	GATTGCTCCTGTGTAAAGATG	NM_003016.x-1514s1c1	3UTR	NM_003016	6427	SFRS2	splicing factor, arginine/serine-rich 2
TRCN0000000104	TRPS0000032679	TTTCTCCCGATTGCTCCTGTG	NM_003016.x-1506s1c1	3UTR	NM_003016	6427	SFRS2	splicing factor, arginine/serine-rich 2
TRCN0000000105	TRPS0000011157	ATCGGCAAGCAGTGTAAACGG	NM_003016.x-833s1c1	3UTR	NM_003016	6427	SFRS2	splicing factor, arginine/serine-rich 2
TRCN0000000106	TRPS0000330079	GGCAAGCAGTGTAAACGGAGG	NM_003016.x-836s1c1	3UTR	NM_003016	6427	SFRS2	splicing factor, arginine/serine-rich 2
TRCN0000000107	TRPS0000031293	TTGCTCCTGTGTAAAGATGCC	NM_003016.x-1516s1c1	3UTR	NM_003016	6427	SFRS2	splicing factor, arginine/serine-rich 2
TRCN0000000108	TRPS0000007857	ATTGCTCCTGTGTAAAGATGC	NM_003016.x-1515s1c1	3UTR	NM_003016	6427	SFRS2	splicing factor, arginine/serine-rich 2
TRCN0000000109	TRPS0000024710	TATCGGCAAGCAGTGTAAACG	NM_003016.x-832s1c1	3UTR	NM_003016	6427	SFRS2	splicing factor, arginine/serine-rich 2
TRCN0000000110	TRPS0000254696	GTCAAAGTAAAGGATGGCATA	NM_003678.x-4304s1c1	3UTR	NM_003678	8563	THOC5	THO complex 5
TRCN0000000111	TRPS0000141174	CCAGCCAATCAGTATCAGTTT	NM_003678.x-1301s1c1	CDS	NM_003678	8563	THOC5	THO complex 5
TRCN0000000112	TRPS0000006910	ATCCTGACTTTGAGCGACTAT	NM_003678.x-1334s1c1	CDS	NM_003678	8563	THOC5	THO complex 5
TRCN0000000113	TRPS0000209185	CTACAGAAGGAGATCACCAAA	NM_003678.x-473s1c1	CDS	NM_003678	8563	THOC5	THO complex 5
TRCN0000000114	TRPS0000274126	GATGTGGCAATAGAAATAGAA	NM_003678.x-290s1c1	CDS	NM_003678	8563	THOC5	THO complex 5
TRCN0000000115	TRPS0000012506	AGCAGGAAATACGAAGAGTTA	NM_004593.x-1625s1c1	3UTR	NM_004593	6434	TRA2B	transformer 2 beta homolog (Drosophila)
TRCN0000000116	TRPS0000265979	GAAGCTAAAGAACGTGCCAAT	NM_004593.x-641s1c1	CDS	NM_004593	6434	TRA2B	transformer 2 beta homolog (Drosophila)
TRCN0000000117	TRPS0000037751	TGCCGATGTGTCTATTGTATA	NM_004593.x-553s1c1	CDS	NM_004593	6434	TRA2B	transformer 2 beta homolog (Drosophila)
TRCN0000000118	TRPS0000015687	ATACGCCAACACCAGGAATTT	NM_004593.x-720s1c1	CDS	NM_004593	6434	TRA2B	transformer 2 beta homolog (Drosophila)
TRCN0000000119	TRPS0000021830	TGGAGTATTTGGGCTGAGCTT	NM_004593.x-481s1c1	CDS	NM_004593	6434	TRA2B	transformer 2 beta homolog (Drosophila)
TRCN0000000120	TRPS0000052434	CCCATAACTAACTGCTGAGGA	NM_004643.x-2355s1c1	3UTR	NM_004643	8106	PABPN1	poly(A) binding protein, nuclear 1
TRCN0000000121	TRPS0000197608	CTCTCGATTCTACAGTGGTTT	NM_004643.x-2113s1c1	CDS	NM_004643	8106	PABPN1	poly(A) binding protein, nuclear 1
TRCN0000000122	TRPS0000349064	GAGGTAGAGAAGCAGATGAAT	NM_004643.x-1706s1c1	CDS	NM_004643	8106	PABPN1	poly(A) binding protein, nuclear 1
TRCN0000000123	TRPS0000100093	CAGATGAATATGAGTCCACCT	NM_004643.x-1718s1c1	CDS	NM_004643	8106	PABPN1	poly(A) binding protein, nuclear 1
TRCN0000000124	TRPS0000005652	AGGTAGAGAAGCAGATGAATA	NM_004643.x-1707s1c1	CDS	NM_004643	8106	PABPN1	poly(A) binding protein, nuclear 1
TRCN0000000125	TRPS0000173421	CCTTATCTCTTGCCCTTATTT	NM_004768.x-2400s1c1	3UTR	NM_004768	9295	SFRS11	splicing factor, arginine/serine-rich 11
TRCN0000000126	TRPS0000310913	GTCCCTAATTTCTGCTGCTAT	NM_004768.x-814s1c1	CDS	NM_004768	9295	SFRS11	splicing factor, arginine/serine-rich 11
TRCN0000000127	TRPS0000017441	AGAACGATCAACAAGCAAGAA	NM_004768.x-1297s1c1	CDS	NM_004768	9295	SFRS11	splicing factor, arginine/serine-rich 11
TRCN0000000128	TRPS0000389989	GAGCTTTGATAGTCGTACCAT	NM_004768.x-432s1c1	CDS	NM_004768	9295	SFRS11	splicing factor, arginine/serine-rich 11
TRCN0000000129	TRPS0000002366	AGCTTTGATAGTCGTACCATA	NM_004768.x-433s1c1	CDS	NM_004768	9295	SFRS11	splicing factor, arginine/serine-rich 11
TRCN0000000130	TRPS0000023609	TCATTCTGTTATTCTGGCTTC	NM_005839.x-3369s1c1	3UTR	NM_005839	10250	SRRM1	serine/arginine repetitive matrix 1
TRCN0000000131	TRPS0000000251	AGACGCCAATACAGACGACAA	NM_005839.x-1443s1c1	CDS	NM_005839	10250	SRRM1	serine/arginine repetitive matrix 1
TRCN0000000132	TRPS0000072020	CCACAACCAAACAAACGGCAT	NM_005839.x-2025s1c1	CDS	NM_005839	10250	SRRM1	serine/arginine repetitive matrix 1
TRCN0000000133	TRPS0000349591	GACGCCAATACAGACGACAAA	NM_005839.x-1444s1c1	CDS	NM_005839	10250	SRRM1	serine/arginine repetitive matrix 1
TRCN0000000134	TRPS0000389917	GCAGTCAAACCGTACAAGAAA	NM_005839.x-1253s1c1	CDS	NM_005839	10250	SRRM1	serine/arginine repetitive matrix 1
TRCN0000000135	TRPS0000035207	TAATGATAACCAGAACTTGCT	NM_005869.x-1609s1c1	3UTR	NM_005869	10283	SDCCAG10	serologically defined colon cancer antigen 10
TRCN0000000136	TRPS0000186612	CGAGCAGATGAACTTAACAAT	NM_005869.x-536s1c1	CDS	NM_005869	10283	SDCCAG10	serologically defined colon cancer antigen 10
TRCN0000000137	TRPS0000013234	AGACCACATAATCCACACAAA	NM_005869.x-641s1c1	CDS	NM_005869	10283	SDCCAG10	serologically defined colon cancer antigen 10
TRCN0000000138	TRPS0000301623	GAACCTGATGAGAGAAAGAAT	NM_005869.x-1015s1c1	CDS	NM_005869	10283	SDCCAG10	serologically defined colon cancer antigen 10
TRCN0000000139	TRPS0000005295	ACGGGAACTCTTAGCAGCAAA	NM_005869.x-1153s1c1	CDS	NM_005869	10283	SDCCAG10	serologically defined colon cancer antigen 10
TRCN0000000140	TRPS0000102451	CATTTAAGATTCAGGAGTCAT	NM_006925.x-562s1c1	3UTR	NM_006925	6430	SFRS5	splicing factor, arginine/serine-rich 5
TRCN0000000141	TRPS0000021367	TGGAAGAGGTAGAGGACGATA	NM_006925.x-452s1c1	CDS	NM_006925	6430	SFRS5	splicing factor, arginine/serine-rich 5
TRCN0000000142	TRPS0000227868	CTGTGTATGAGCTTGATGGAA	NM_006925.x-376s1c1	CDS	NM_006925	6430	SFRS5	splicing factor, arginine/serine-rich 5
TRCN0000000143	TRPS0000349592	GACGGTATGTGAAGGGTGGAT	NM_006925.x-511s1c1	CDS	NM_006925	6430	SFRS5	splicing factor, arginine/serine-rich 5
TRCN0000000144	TRPS0000010208	AGACGGTATGTGAAGGGTGGA	NM_006925.x-510s1c1	CDS	NM_006925	6430	SFRS5	splicing factor, arginine/serine-rich 5
TRCN0000000145	TRPS0000129374	CAGTGTAGAATAAATGTGGTA	NM_007006.x-743s1c1	3UTR	NM_007006	11051	NUDT21	nudix (nucleoside diphosphate linked moiety X)-type motif 21
TRCN0000000146	TRPS0000118399	CTGCACATATTACAAAGCCTA	NM_007006.x-485s1c1	CDS	NM_007006	11051	NUDT21	nudix (nucleoside diphosphate linked moiety X)-type motif 21
TRCN0000000147	TRPS0000189282	CATTGACGATTGCATTGGTAA	NM_007006.x-420s1c1	CDS	NM_007006	11051	NUDT21	nudix (nucleoside diphosphate linked moiety X)-type motif 21
TRCN0000000148	TRPS0000178481	CAGCGCATGAGGGAAGAATTT	NM_007006.x-193s1c1	CDS	NM_007006	11051	NUDT21	nudix (nucleoside diphosphate linked moiety X)-type motif 21
TRCN0000000149	TRPS0000366551	GAACCTCCTCAGTATCCATAT	NM_007006.x-460s1c1	CDS	NM_007006	11051	NUDT21	nudix (nucleoside diphosphate linked moiety X)-type motif 21
TRCN0000000150	TRPS0000263021	GCAGCAGGTAAATGTGAGTAA	NM_007007.x-2697s1c1	3UTR	NM_007007	11052	CPSF6	cleavage and polyadenylation specific factor 6, 68kDa
TRCN0000000151	TRPS0000145048	CTGGTGATTATGGGAGTGCTA	NM_007007.x-1347s1c1	CDS	NM_007007	11052	CPSF6	cleavage and polyadenylation specific factor 6, 68kDa
TRCN0000000152	TRPS0000385948	GAAATCTAACATGGTGGACAA	NM_007007.x-291s1c1	CDS	NM_007007	11052	CPSF6	cleavage and polyadenylation specific factor 6, 68kDa
TRCN0000000153	TRPS0000126043	CACTGGTAACTGCAATTTCTT	NM_007007.x-1374s1c1	CDS	NM_007007	11052	CPSF6	cleavage and polyadenylation specific factor 6, 68kDa
TRCN0000000154	TRPS0000009738	ACCATAGTAGATCACGAGAAA	NM_007007.x-1527s1c1	CDS	NM_007007	11052	CPSF6	cleavage and polyadenylation specific factor 6, 68kDa
TRCN0000000155	TRPS0000123563	CACCACCAGCACACGGAACTA	NM_013291.x-4396s1c1	3UTR	NM_013291	29894	CPSF1	cleavage and polyadenylation specific factor 1, 160kDa
TRCN0000000156	TRPS0000338592	GACGGGTTTGTGCAGAATGTA	NM_013291.x-439s1c1	CDS	NM_013291	29894	CPSF1	cleavage and polyadenylation specific factor 1, 160kDa
TRCN0000000157	TRPS0000183810	CCGCTACTTCGAGGATATTTA	NM_013291.x-2844s1c1	CDS	NM_013291	29894	CPSF1	cleavage and polyadenylation specific factor 1, 160kDa
TRCN0000000158	TRPS0000220195	CACCTTCATCTCCTACGACAA	NM_013291.x-1032s1c1	CDS	NM_013291	29894	CPSF1	cleavage and polyadenylation specific factor 1, 160kDa
TRCN0000000159	TRPS0000227443	CCTCACAACATCAACTTCCGT	NM_013291.x-2737s1c1	CDS	NM_013291	29894	CPSF1	cleavage and polyadenylation specific factor 1, 160kDa
TRCN0000000160	TRPS0000005220	ACAGCTAAATATCAAGGCCAA	NM_014337.x-509s1c1	CDS	NM_014337	23759	PPIL2	peptidylprolyl isomerase (cyclophilin)-like 2
TRCN0000000161	TRPS0000022351	TCTCAATTCTTCATCACGTTT	NM_014337.x-1245s1c1	CDS	NM_014337	23759	PPIL2	peptidylprolyl isomerase (cyclophilin)-like 2
TRCN0000000162	TRPS0000268187	GCTAAATATCAAGGCCAAGAA	NM_014337.x-512s1c1	CDS	NM_014337	23759	PPIL2	peptidylprolyl isomerase (cyclophilin)-like 2
TRCN0000000163	TRPS0000091307	CAACAGCAACAGGTCTCAATT	NM_014337.x-1232s1c1	CDS	NM_014337	23759	PPIL2	peptidylprolyl isomerase (cyclophilin)-like 2
TRCN0000000164	TRPS0000085963	CCAACAGCAACAGGTCTCAAT	NM_014337.x-1231s1c1	CDS	NM_014337	23759	PPIL2	peptidylprolyl isomerase (cyclophilin)-like 2
TRCN0000000165	TRPS0000309314	GCTTAGGACTTGCTGAATATA	NM_015342.x-2013s1c1	3UTR	NM_015342	23398	PPWD1	peptidylprolyl isomerase domain and WD repeat containing 1
TRCN0000000166	TRPS0000057627	CCTGGGAGTTATTGAGAGTAT	NM_015342.x-399s1c1	CDS	NM_015342	23398	PPWD1	peptidylprolyl isomerase domain and WD repeat containing 1
TRCN0000000167	TRPS0000120082	CCAAACGAGAACCAGAAGATA	NM_015342.x-1358s1c1	CDS	NM_015342	23398	PPWD1	peptidylprolyl isomerase domain and WD repeat containing 1
TRCN0000000168	TRPS0000012421	ACATGGAATTTGGCCGACGAA	NM_015342.x-1013s1c1	CDS	NM_015342	23398	PPWD1	peptidylprolyl isomerase domain and WD repeat containing 1
TRCN0000000169	TRPS0000017893	ACATGCTGAAACTTGGCTATT	NM_015342.x-509s1c1	CDS	NM_015342	23398	PPWD1	peptidylprolyl isomerase domain and WD repeat containing 1
TRCN0000000170	TRPS0000343820	GCACGCCCTATTTCAGTCTTT	NM_016059.x-1178s1c1	3UTR	NM_016059	51645	PPIL1	peptidylprolyl isomerase (cyclophilin)-like 1
TRCN0000000171	TRPS0000198407	CCACAGAATTATCAAAGACTT	NM_016059.x-380s1c1	CDS	NM_016059	51645	PPIL1	peptidylprolyl isomerase (cyclophilin)-like 1
TRCN0000000172	TRPS0000029582	TGCTCCAAAGACCTGTAAGAA	NM_016059.x-314s1c1	CDS	NM_016059	51645	PPIL1	peptidylprolyl isomerase (cyclophilin)-like 1
TRCN0000000173	TRPS0000012507	AGGTTACTACAATGGCACAAA	NM_016059.x-356s1c1	CDS	NM_016059	51645	PPIL1	peptidylprolyl isomerase (cyclophilin)-like 1
TRCN0000000174	TRPS0000220165	CGAGGTTACTACAATGGCACA	NM_016059.x-354s1c1	CDS	NM_016059	51645	PPIL1	peptidylprolyl isomerase (cyclophilin)-like 1
TRCN0000000175	TRPS0000203134	CTGGAGGTTGTATAAGGTGTT	NM_016333.x-8842s1c1	3UTR	NM_016333	23524	SRRM2	serine/arginine repetitive matrix 2
TRCN0000000176	TRPS0000050762	CGCCACCTAAACAGAAATCTA	NM_016333.x-2687s1c1	CDS	NM_016333	23524	SRRM2	serine/arginine repetitive matrix 2
TRCN0000000177	TRPS0000134944	CCCAAAGTGAAGGCAATAATA	NM_016333.x-2974s1c1	CDS	NM_016333	23524	SRRM2	serine/arginine repetitive matrix 2
TRCN0000000178	TRPS0000247038	GAAGAGTTAATGGAGGTGGTA	NM_016333.x-3931s1c1	CDS	NM_016333	23524	SRRM2	serine/arginine repetitive matrix 2
TRCN0000000179	TRPS0000224062	CTATTTGCTTGATTACCATTC	NM_016631.x-2793s1c1	3UTR	NM_016631	94104	C21orf66	chromosome 21 open reading frame 66
TRCN0000000180	TRPS0000328573	GATGATGTATTTATGCCCTTA	NM_016631.x-2255s1c1	CDS	NM_016631	94104	C21orf66	chromosome 21 open reading frame 66
TRCN0000000181	TRPS0000131150	CCAGAACACTTACCAGACAAT	NM_016631.x-1033s1c1	CDS	NM_016631	94104	C21orf66	chromosome 21 open reading frame 66
TRCN0000000182	TRPS0000305006	GTGATGATGATGCTTTAGTAA	NM_016631.x-903s1c1	CDS	NM_016631	94104	C21orf66	chromosome 21 open reading frame 66
TRCN0000000183	TRPS0000023552	TCCATGAAAGAATTGCACAAA	NM_016631.x-1220s1c1	CDS	NM_016631	94104	C21orf66	chromosome 21 open reading frame 66
TRCN0000000184	TRPS0000161449	CATCATCCTTCTGCTTGTTTA	NM_130906.x-748s1c1	3UTR	NM_130906	53938	PPIL3	peptidylprolyl isomerase (cyclophilin)-like 3
TRCN0000000185	TRPS0000031801	TCTCAGTTCTTCATCACCTAT	NM_130906.x-471s1c1	CDS	NM_130906	53938	PPIL3	peptidylprolyl isomerase (cyclophilin)-like 3
TRCN0000000186	TRPS0000016384	AGGTGTTGTATCTATGGCTAA	NM_130906.x-428s1c1	CDS	NM_130906	53938	PPIL3	peptidylprolyl isomerase (cyclophilin)-like 3
TRCN0000000187	TRPS0000390747	GAGGTGTTGTATCTATGGCTA	NM_130906.x-427s1c1	CDS	NM_130906	53938	PPIL3	peptidylprolyl isomerase (cyclophilin)-like 3
TRCN0000000188	TRPS0000144481	CCGACCTCTTAATGATGTACA	NM_130906.x-599s1c1	CDS	NM_130906	53938	PPIL3	peptidylprolyl isomerase (cyclophilin)-like 3
TRCN0000000189	TRPS0000095171	CTCATGCTTTCTGGTAGTATT	NM_000187.x-1563s1c1	3UTR	NM_000187	3081	HGD	homogentisate 1,2-dioxygenase (homogentisate oxidase)
TRCN0000000190	TRPS0000131553	CGTGATTTCTTGATACCCATT	NM_000187.x-840s1c1	CDS	NM_000187	3081	HGD	homogentisate 1,2-dioxygenase (homogentisate oxidase)
TRCN0000000191	TRPS0000024222	TGATGCTGACTGCTTTGAGAA	NM_000187.x-1286s1c1	CDS	NM_000187	3081	HGD	homogentisate 1,2-dioxygenase (homogentisate oxidase)
TRCN0000000192	TRPS0000014751	ACAAGTACAACCTGAAGAATT	NM_000187.x-991s1c1	CDS	NM_000187	3081	HGD	homogentisate 1,2-dioxygenase (homogentisate oxidase)
TRCN0000000193	TRPS0000017715	AGGGAGTCTACACAGCACAAT	NM_000187.x-1250s1c1	CDS	NM_000187	3081	HGD	homogentisate 1,2-dioxygenase (homogentisate oxidase)
TRCN0000000194	TRPS0000015436	ACTCATAACAACACAGACATA	NM_000860.x-1794s1c1	3UTR	NM_000860	3248	HPGD	hydroxyprostaglandin dehydrogenase 15-(NAD)
TRCN0000000195	TRPS0000312605	GCTGGAGTGAATAATGAGAAA	NM_000860.x-292s1c1	CDS	NM_000860	3248	HPGD	hydroxyprostaglandin dehydrogenase 15-(NAD)
TRCN0000000196	TRPS0000307540	GCAACAACTGAGAGACACTTT	NM_000860.x-222s1c1	CDS	NM_000860	3248	HPGD	hydroxyprostaglandin dehydrogenase 15-(NAD)
TRCN0000000197	TRPS0000351319	GAAGGCGGCATCATTATCAAT	NM_000860.x-403s1c1	CDS	NM_000860	3248	HPGD	hydroxyprostaglandin dehydrogenase 15-(NAD)
TRCN0000000198	TRPS0000202475	CACAGCCATCCTTGAATCAAT	NM_000860.x-579s1c1	CDS	NM_000860	3248	HPGD	hydroxyprostaglandin dehydrogenase 15-(NAD)
TRCN0000000199	TRPS0000220966	CCCAGAAACTACAATAAAGAA	NM_000947.x-2202s1c1	3UTR	NM_000947	5558	PRIM2	primase, DNA, polypeptide 2 (58kDa)
TRCN0000000200	TRPS0000073150	CTACCCTCATTGCCTTCAGTT	NM_000947.x-150s1c1	CDS	NM_000947	5558	PRIM2	primase, DNA, polypeptide 2 (58kDa)
TRCN0000000201	TRPS0000145597	CACGAAGAAGAGATCATATTT	NM_000947.x-371s1c1	CDS	NM_000947	5558	PRIM2	primase, DNA, polypeptide 2 (58kDa)
TRCN0000000202	TRPS0000330078	GAGAAGCTAGAAGATGAATAT	NM_000947.x-346s1c1	CDS	NM_000947	5558	PRIM2	primase, DNA, polypeptide 2 (58kDa)
TRCN0000000203	TRPS0000247613	GAGAGAAGCTAGAAGATGAAT	NM_000947.x-344s1c1	CDS	NM_000947	5558	PRIM2	primase, DNA, polypeptide 2 (58kDa)
TRCN0000000204	TRPS0000272237	GTACTGTTTCTGGACCCTTAT	NM_000958.x-1876s1c1	3UTR	NM_000958	5734	PTGER4	prostaglandin E receptor 4 (subtype EP4)
TRCN0000000205	TRPS0000000830	ACCAGTTATATCAGCCAAGTT	NM_000958.x-1272s1c1	CDS	NM_000958	5734	PTGER4	prostaglandin E receptor 4 (subtype EP4)
TRCN0000000206	TRPS0000218264	CCAGTTATATCAGCCAAGTTT	NM_000958.x-1273s1c1	CDS	NM_000958	5734	PTGER4	prostaglandin E receptor 4 (subtype EP4)
TRCN0000000207	TRPS0000045636	CTCACGCTCTTTGCAGTCTAT	NM_000958.x-800s1c1	CDS	NM_000958	5734	PTGER4	prostaglandin E receptor 4 (subtype EP4)
TRCN0000000208	TRPS0000146766	CAGTAAAGCAATAGAGAAGAT	NM_000958.x-1399s1c1	CDS	NM_000958	5734	PTGER4	prostaglandin E receptor 4 (subtype EP4)
TRCN0000000209	TRPS0000343788	GCGTAGTATTCAAACCAGTAT	NM_002247.x-5574s1c1	3UTR	NM_002247	3778	KCNMA1	potassium large conductance calcium-activated channel, subfamily M, alpha member 1
TRCN0000000210	TRPS0000211466	CCCAATAGAATCCTGCCAGAA	NM_002247.x-780s1c1	CDS	NM_002247	3778	KCNMA1	potassium large conductance calcium-activated channel, subfamily M, alpha member 1
TRCN0000000211	TRPS0000037555	TGGCAGAAATACTACTTGGAA	NM_002247.x-1942s1c1	CDS	NM_002247	3778	KCNMA1	potassium large conductance calcium-activated channel, subfamily M, alpha member 1
TRCN0000000212	TRPS0000297952	GTCAAGATAGAGTCAGCAGAT	NM_002247.x-1612s1c1	CDS	NM_002247	3778	KCNMA1	potassium large conductance calcium-activated channel, subfamily M, alpha member 1
TRCN0000000213	TRPS0000211889	CCGAGCTGGAATTGGAAAGAA	NM_002247.x-1789s1c1	CDS	NM_002247	3778	KCNMA1	potassium large conductance calcium-activated channel, subfamily M, alpha member 1
TRCN0000000214	TRPS0000303555	GATGAGTTGCTGCTATTCTTT	NM_002867.x-907s1c1	3UTR	NM_002867	5865	RAB3B	RAB3B, member RAS oncogene family
TRCN0000000215	TRPS0000318101	GAGTCCTTCAATGCTGTCCAA	NM_002867.x-447s1c1	CDS	NM_002867	5865	RAB3B	RAB3B, member RAS oncogene family
TRCN0000000216	TRPS0000013583	AGTGCAAAGGAGAACATCAGT	NM_002867.x-618s1c1	CDS	NM_002867	5865	RAB3B	RAB3B, member RAS oncogene family
TRCN0000000217	TRPS0000009753	AGAGTCCTTCAATGCTGTCCA	NM_002867.x-446s1c1	CDS	NM_002867	5865	RAB3B	RAB3B, member RAS oncogene family
TRCN0000000218	TRPS0000264751	GCTACTCAGATCAAGACCTAC	NM_002867.x-474s1c1	CDS	NM_002867	5865	RAB3B	RAB3B, member RAS oncogene family
TRCN0000000219	TRPS0000386580	GTGTCCGTTATGAGTGCCAAA	NM_002923.x-1248s1c1	3UTR	NM_002923	5997	RGS2	regulator of G-protein signaling 2, 24kDa
TRCN0000000220	TRPS0000183978	CCCAGAATATACAAGAAGCTA	NM_002923.x-508s1c1	CDS	NM_002923	5997	RGS2	regulator of G-protein signaling 2, 24kDa
TRCN0000000221	TRPS0000298353	GACCCGTTTGAGCTACTTCTT	NM_002923.x-158s1c1	CDS	NM_002923	5997	RGS2	regulator of G-protein signaling 2, 24kDa
TRCN0000000222	TRPS0000005774	ACCCGTTTGAGCTACTTCTTA	NM_002923.x-159s1c1	CDS	NM_002923	5997	RGS2	regulator of G-protein signaling 2, 24kDa
TRCN0000000223	TRPS0000068621	CAGAATATACAAGAAGCTACA	NM_002923.x-510s1c1	CDS	NM_002923	5997	RGS2	regulator of G-protein signaling 2, 24kDa
TRCN0000000224	TRPS0000147777	CGTGACTGTAAGATTGTAAAT	NM_003246.x-4744s1c1	3UTR	NM_003246	7057	THBS1	thrombospondin 1
TRCN0000000225	TRPS0000151675	CTGTAGGTTATGATGAGTTTA	NM_003246.x-3101s1c1	CDS	NM_003246	7057	THBS1	thrombospondin 1
TRCN0000000226	TRPS0000230993	CTGACCTGAAATACGAATGTA	NM_003246.x-3593s1c1	CDS	NM_003246	7057	THBS1	thrombospondin 1
TRCN0000000227	TRPS0000230146	CTATGCTATCACAACGGAGTT	NM_003246.x-1060s1c1	CDS	NM_003246	7057	THBS1	thrombospondin 1
TRCN0000000228	TRPS0000326598	GACTATGACAAGGATGGAATT	NM_003246.x-2293s1c1	CDS	NM_003246	7057	THBS1	thrombospondin 1
TRCN0000000229	TRPS0000198408	CCAGAGTGCAAGCCAGAAATT	NM_003579.x-1274s1c1	CDS	NM_003579	8438	RAD54L	RAD54-like (S. cerevisiae)
TRCN0000000230	TRPS0000211335	CTTTGTAATCATCCAGCTCTA	NM_003579.x-2027s1c1	CDS	NM_003579	8438	RAD54L	RAD54-like (S. cerevisiae)
TRCN0000000231	TRPS0000090022	CCTGGATTATATTCTGGCGGT	NM_003579.x-2161s1c1	CDS	NM_003579	8438	RAD54L	RAD54-like (S. cerevisiae)
TRCN0000000232	TRPS0000296951	GTGAAGATTGAGCAGGTCGTT	NM_003579.x-1877s1c1	CDS	NM_003579	8438	RAD54L	RAD54-like (S. cerevisiae)
TRCN0000000233	TRPS0000302688	GTCCATTAAGAAGCGAGCCAA	NM_003579.x-2302s1c1	CDS	NM_003579	8438	RAD54L	RAD54-like (S. cerevisiae)
TRCN0000000234	TRPS0000193357	CCTACGAAATATGAAGAGCAA	NM_004117.x-3276s1c1	3UTR	NM_004117	2289	FKBP5	FK506 binding protein 5
TRCN0000000235	TRPS0000078090	CGAAGGAGCAACAGTAGAAAT	NM_004117.x-642s1c1	CDS	NM_004117	2289	FKBP5	FK506 binding protein 5
TRCN0000000236	TRPS0000317381	GAACCATTTGTCTTTAGTCTT	NM_004117.x-376s1c1	CDS	NM_004117	2289	FKBP5	FK506 binding protein 5
TRCN0000000237	TRPS0000094500	CCCTCGAATGCAACTCTCTTT	NM_004117.x-520s1c1	CDS	NM_004117	2289	FKBP5	FK506 binding protein 5
TRCN0000000238	TRPS0000236243	CAAACGGAAAGGAGAGGGATA	NM_004117.x-609s1c1	CDS	NM_004117	2289	FKBP5	FK506 binding protein 5
TRCN0000000239	TRPS0000107788	CCACCCACCATATTGTTTGAT	NM_004613.x-2519s1c1	3UTR	NM_004613	7052	TGM2	transglutaminase 2 (C polypeptide, protein-glutamine-gamma-glutamyltransferase)
TRCN0000000240	TRPS0000014217	AGAAATACCGTGACTGCCTTA	NM_004613.x-1781s1c1	CDS	NM_004613	7052	TGM2	transglutaminase 2 (C polypeptide, protein-glutamine-gamma-glutamyltransferase)
TRCN0000000241	TRPS0000012124	ACAGCAACCTTCTCATCGAGT	NM_004613.x-1058s1c1	CDS	NM_004613	7052	TGM2	transglutaminase 2 (C polypeptide, protein-glutamine-gamma-glutamyltransferase)
TRCN0000000242	TRPS0000013998	AGAAGAGCGAAGGAACGTACT	NM_004613.x-1223s1c1	CDS	NM_004613	7052	TGM2	transglutaminase 2 (C polypeptide, protein-glutamine-gamma-glutamyltransferase)
TRCN0000000243	TRPS0000033132	TGAGAAATACCGTGACTGCCT	NM_004613.x-1779s1c1	CDS	NM_004613	7052	TGM2	transglutaminase 2 (C polypeptide, protein-glutamine-gamma-glutamyltransferase)
TRCN0000000244	TRPS0000002925	ATGGGAAAGTGCAAGTGGATG	NM_004969.x-3131s1c1	3UTR	NM_004969	3416	IDE	insulin-degrading enzyme
TRCN0000000245	TRPS0000044285	CCTGACTTAATAGAGATGGTT	NM_004969.x-1438s1c1	CDS	NM_004969	3416	IDE	insulin-degrading enzyme
TRCN0000000246	TRPS0000177536	CCTGGTCATTATCTTGGTCAT	NM_004969.x-1045s1c1	CDS	NM_004969	3416	IDE	insulin-degrading enzyme
TRCN0000000247	TRPS0000054443	CCTGAAGACAAGCGAGAATAT	NM_004969.x-229s1c1	CDS	NM_004969	3416	IDE	insulin-degrading enzyme
TRCN0000000248	TRPS0000001353	ACTTGACTAATCTGGTGGTAA	NM_004969.x-854s1c1	CDS	NM_004969	3416	IDE	insulin-degrading enzyme
TRCN0000000249	TRPS0000028205	TAACTGCACTTTCGGCCCTTT	NM_005225.x-1819s1c1	3UTR	NM_005225	1869	E2F1	E2F transcription factor 1
TRCN0000000250	TRPS0000316147	GACCTCTTCGACTGTGACTTT	NM_005225.x-1390s1c1	CDS	NM_005225	1869	E2F1	E2F transcription factor 1
TRCN0000000251	TRPS0000110625	CATCCAGCTCATTGCCAAGAA	NM_005225.x-651s1c1	CDS	NM_005225	1869	E2F1	E2F transcription factor 1
TRCN0000000252	TRPS0000024488	TAAGAGCAAACAAGGCCCGAT	NM_005225.x-981s1c1	CDS	NM_005225	1869	E2F1	E2F transcription factor 1
TRCN0000000253	TRPS0000010129	ACCTCTTCGACTGTGACTTTG	NM_005225.x-1391s1c1	CDS	NM_005225	1869	E2F1	E2F transcription factor 1
TRCN0000000254	TRPS0000016533	ATTTGCAGTCATGGAGAACCA	NM_005360.x-2067s1c1	3UTR	NM_005360	4094	MAF	v-maf musculoaponeurotic fibrosarcoma oncogene homolog (avian)
TRCN0000000255	TRPS0000188143	CAAGGAGAAATACGAGAAGTT	NM_005360.x-1839s1c1	CDS	NM_005360	4094	MAF	v-maf musculoaponeurotic fibrosarcoma oncogene homolog (avian)
TRCN0000000256	TRPS0000015952	ACAAGGAGAAATACGAGAAGT	NM_005360.x-1838s1c1	CDS	NM_005360	4094	MAF	v-maf musculoaponeurotic fibrosarcoma oncogene homolog (avian)
TRCN0000000257	TRPS0000008374	ACCTGGAAGACTACTACTGGA	NM_005360.x-1067s1c1	CDS	NM_005360	4094	MAF	v-maf musculoaponeurotic fibrosarcoma oncogene homolog (avian)
TRCN0000000258	TRPS0000035404	TGGAAGACTACTACTGGATGA	NM_005360.x-1070s1c1	CDS	NM_005360	4094	MAF	v-maf musculoaponeurotic fibrosarcoma oncogene homolog (avian)
TRCN0000000259	TRPS0000271747	GTTTGCAGTTTGTCCTCATAA	NM_005391.x-1393s1c1	3UTR	NM_005391	5165	PDK3	pyruvate dehydrogenase kinase, isozyme 3
TRCN0000000260	TRPS0000017788	AGAGTTGGTATATGCAGAGTT	NM_005391.x-264s1c1	CDS	NM_005391	5165	PDK3	pyruvate dehydrogenase kinase, isozyme 3
TRCN0000000261	TRPS0000235935	CAGGTCTTGGATAACTTTCTA	NM_005391.x-329s1c1	CDS	NM_005391	5165	PDK3	pyruvate dehydrogenase kinase, isozyme 3
TRCN0000000262	TRPS0000328928	GCTGGCTAACACAATGAGAGA	NM_005391.x-190s1c1	CDS	NM_005391	5165	PDK3	pyruvate dehydrogenase kinase, isozyme 3
TRCN0000000263	TRPS0000114696	CCCGTGCATGATTTACTCTTA	NM_005656.x-1668s1c1	3UTR	NM_005656	7113	TMPRSS2	transmembrane protease, serine 2
TRCN0000000264	TRPS0000157686	CCTCTTAACAATCCATGGCAT	NM_005656.x-1028s1c1	CDS	NM_005656	7113	TMPRSS2	transmembrane protease, serine 2
TRCN0000000265	TRPS0000373317	GATGGTATTCACGGACTGGAT	NM_005656.x-1558s1c1	CDS	NM_005656	7113	TMPRSS2	transmembrane protease, serine 2
TRCN0000000266	TRPS0000044968	CCGGCAATGTCGATATCTATA	NM_005656.x-774s1c1	CDS	NM_005656	7113	TMPRSS2	transmembrane protease, serine 2
TRCN0000000267	TRPS0000283067	GCACAGCATCATCAAGGACTT	NM_006739.x-2155s1c1	CDS	NM_006739	4174	MCM5	minichromosome maintenance complex component 5
TRCN0000000268	TRPS0000372627	GAAACTGAAGAACCGCTACAT	NM_006739.x-1822s1c1	CDS	NM_006739	4174	MCM5	minichromosome maintenance complex component 5
TRCN0000000269	TRPS0000346202	GTACTGGATTGAGGTGGAGAT	NM_006739.x-283s1c1	CDS	NM_006739	4174	MCM5	minichromosome maintenance complex component 5
TRCN0000000270	TRPS0000004286	AGAGAAACTGAAGAACCGCTA	NM_006739.x-1819s1c1	CDS	NM_006739	4174	MCM5	minichromosome maintenance complex component 5
TRCN0000000271	TRPS0000017475	AGGGAGCTGTGCATTGTGAAT	NM_006849.x-1623s1c1	3UTR	NM_006849	64714	PDIA2	protein disulfide isomerase family A, member 2
TRCN0000000272	TRPS0000353446	GACCACGAGGACATCATCATT	NM_006849.x-1294s1c1	CDS	NM_006849	64714	PDIA2	protein disulfide isomerase family A, member 2
TRCN0000000273	TRPS0000000377	AGGTCGGAAGGTGATTGAATA	NM_006849.x-1398s1c1	CDS	NM_006849	64714	PDIA2	protein disulfide isomerase family A, member 2
TRCN0000000274	TRPS0000098928	CAGGTCGGAAGGTGATTGAAT	NM_006849.x-1397s1c1	CDS	NM_006849	64714	PDIA2	protein disulfide isomerase family A, member 2
TRCN0000000275	TRPS0000082038	CACGAGGACATCATCATTGCT	NM_006849.x-1297s1c1	CDS	NM_006849	64714	PDIA2	protein disulfide isomerase family A, member 2
TRCN0000000276	TRPS0000225201	CCAAGTTCATTACCTCCCTAT	NM_012104.x-3455s1c1	3UTR	NM_012104	23621	BACE1	beta-site APP-cleaving enzyme 1
TRCN0000000277	TRPS0000329859	GAGGGCTTCTACGTTGTCTTT	NM_012104.x-1644s1c1	CDS	NM_012104	23621	BACE1	beta-site APP-cleaving enzyme 1
TRCN0000000278	TRPS0000291860	GCACTGTTATGGGAGCTGTTA	NM_012104.x-1618s1c1	CDS	NM_012104	23621	BACE1	beta-site APP-cleaving enzyme 1
TRCN0000000279	TRPS0000049352	CACTGTTATGGGAGCTGTTAT	NM_012104.x-1619s1c1	CDS	NM_012104	23621	BACE1	beta-site APP-cleaving enzyme 1
TRCN0000000280	TRPS0000007130	AGTTTGCCATCTCACAGTCAT	NM_012104.x-1591s1c1	CDS	NM_012104	23621	BACE1	beta-site APP-cleaving enzyme 1
TRCN0000000281	TRPS0000189948	CGTGAACATAACTGAGGGCAT	NM_013988.x-2399s1c1	3UTR	NM_013988	5071	PARK2	Parkinson disease (autosomal recessive, juvenile) 2, parkin
TRCN0000000282	TRPS0000221740	CGCAACAAATAGTCGGAACAT	NM_013988.x-341s1c1	CDS	NM_013988	5071	PARK2	Parkinson disease (autosomal recessive, juvenile) 2, parkin
TRCN0000000283	TRPS0000093371	CGTGATTTGCTTAGACTGTTT	NM_013988.x-425s1c1	CDS	NM_013988	5071	PARK2	Parkinson disease (autosomal recessive, juvenile) 2, parkin
TRCN0000000284	TRPS0000109418	CTCCAAAGAAACCATCAAGAA	NM_013988.x-872s1c1	CDS	NM_013988	5071	PARK2	Parkinson disease (autosomal recessive, juvenile) 2, parkin
TRCN0000000285	TRPS0000140734	CTTAGACTGTTTCCACTTATA	NM_013988.x-434s1c1	CDS	NM_013988	5071	PARK2	Parkinson disease (autosomal recessive, juvenile) 2, parkin
TRCN0000000286	TRPS0000317374	GTTTCCCATTCATACACCTAT	NM_014220.x-1156s1c1	3UTR	NM_014220	4071	TM4SF1	transmembrane 4 L six family member 1
TRCN0000000287	TRPS0000312627	GAATGGAATGTATCTCTGTTT	NM_014220.x-570s1c1	CDS	NM_014220	4071	TM4SF1	transmembrane 4 L six family member 1
TRCN0000000288	TRPS0000254648	GTGCGATGCTTTCTTCTGTAT	NM_014220.x-364s1c1	CDS	NM_014220	4071	TM4SF1	transmembrane 4 L six family member 1
TRCN0000000289	TRPS0000035756	TGGCTCTTGGTGGAATTGAAT	NM_014220.x-601s1c1	CDS	NM_014220	4071	TM4SF1	transmembrane 4 L six family member 1
TRCN0000000290	TRPS0000030762	TCAAGTAATAAATGGAGTGCT	NM_014220.x-638s1c1	CDS	NM_014220	4071	TM4SF1	transmembrane 4 L six family member 1
TRCN0000000291	TRPS0000294675	GATGTGTTTCTGGGATTGTAT	NM_014606.x-3454s1c1	3UTR	NM_014606	8916	HERC3	hect domain and RLD 3
TRCN0000000292	TRPS0000016347	AGGGTGTTATTTGAGAAGTTA	NM_014606.x-1556s1c1	CDS	NM_014606	8916	HERC3	hect domain and RLD 3
TRCN0000000293	TRPS0000180644	CCAAGCACATTATACCAGTTT	NM_014606.x-1348s1c1	CDS	NM_014606	8916	HERC3	hect domain and RLD 3
TRCN0000000294	TRPS0000055173	CAAGGATAACAGGCAGGAATT	NM_014606.x-2812s1c1	CDS	NM_014606	8916	HERC3	hect domain and RLD 3
TRCN0000000295	TRPS0000160754	CGAGAAAGCTATGGAGTGATT	NM_014606.x-2747s1c1	CDS	NM_014606	8916	HERC3	hect domain and RLD 3
TRCN0000000296	TRPS0000131557	CAAAGGAGAAAGGACCACATT	NM_014668.x-6898s1c1	3UTR	NM_014668	9687	UNK	GREB1 protein
TRCN0000000297	TRPS0000384711	GTCACGAACATGGGCTCTTTA	NM_014668.x-4958s1c1	CDS	NM_014668	9687	UNK	GREB1 protein
TRCN0000000298	TRPS0000338499	GAAGTCAATTACGAGCTGGTT	NM_014668.x-2056s1c1	CDS	NM_014668	9687	UNK	GREB1 protein
TRCN0000000299	TRPS0000011488	ACTGGCAAAGAATAACCTGTT	NM_014668.x-1155s1c1	CDS	NM_014668	9687	UNK	GREB1 protein
TRCN0000000300	TRPS0000318048	GCCTTCTCTTACTCCATGCTA	NM_014668.x-4777s1c1	CDS	NM_014668	9687	UNK	GREB1 protein
TRCN0000000301	TRPS0000192602	CTGCAACAAATAAACCTTCTA	NM_016447.x-1968s1c1	3UTR	NM_016447	51678	MPP6	membrane protein, palmitoylated 6 (MAGUK p55 subfamily member 6)
TRCN0000000302	TRPS0000350475	GTGGCAGAATTGGTTGGTATA	NM_016447.x-528s1c1	CDS	NM_016447	51678	MPP6	membrane protein, palmitoylated 6 (MAGUK p55 subfamily member 6)
TRCN0000000303	TRPS0000015551	ACCTCCATCAAGCCCAGAAAT	NM_016447.x-617s1c1	CDS	NM_016447	51678	MPP6	membrane protein, palmitoylated 6 (MAGUK p55 subfamily member 6)
TRCN0000000304	TRPS0000037308	TGTGGCAGAATTGGTTGGTAT	NM_016447.x-527s1c1	CDS	NM_016447	51678	MPP6	membrane protein, palmitoylated 6 (MAGUK p55 subfamily member 6)
TRCN0000000305	TRPS0000280737	GTTAGAAGAGACTGGGACAAT	NM_016447.x-1158s1c1	CDS	NM_016447	51678	MPP6	membrane protein, palmitoylated 6 (MAGUK p55 subfamily member 6)
TRCN0000000306	TRPS0000315463	GAAGTGAATATCCCTGTAGAA	NM_018063.x-1744s1c1	CDS	NM_018063	3070	HELLS	helicase, lymphoid-specific
TRCN0000000307	TRPS0000273056	GCCAGATGTATTTGATGACTT	NM_018063.x-1308s1c1	CDS	NM_018063	3070	HELLS	helicase, lymphoid-specific
TRCN0000000308	TRPS0000388620	GTTGTTGTTTATCGCCTTGTT	NM_018063.x-2254s1c1	CDS	NM_018063	3070	HELLS	helicase, lymphoid-specific
TRCN0000000309	TRPS0000032356	TCCAGTGAGAAAGAAACAATT	NM_018063.x-1585s1c1	CDS	NM_018063	3070	HELLS	helicase, lymphoid-specific
TRCN0000000310	TRPS0000352791	GAATATGAAGTGCCGTCTAAT	NM_018063.x-1185s1c1	CDS	NM_018063	3070	HELLS	helicase, lymphoid-specific
TRCN0000000311	TRPS0000022134	TGCCTCGATTTCTCAGTGGTT	NM_018081.x-630s1c1	CDS	NM_018081	55135	WRAP53	WD repeat containing, antisense to TP53
TRCN0000000312	TRPS0000332796	GTTCCTGCATCTTGACCAATA	NM_018081.x-714s1c1	CDS	NM_018081	55135	WRAP53	WD repeat containing, antisense to TP53
TRCN0000000313	TRPS0000170953	CACCAATCAGCGCATCTACTT	NM_018081.x-1408s1c1	CDS	NM_018081	55135	WRAP53	WD repeat containing, antisense to TP53
TRCN0000000314	TRPS0000147178	CACCCAACCTGAGAACTTCTT	NM_018081.x-667s1c1	CDS	NM_018081	55135	WRAP53	WD repeat containing, antisense to TP53
TRCN0000000315	TRPS0000173192	CATATCTGGGACGCATTCACT	NM_018081.x-935s1c1	CDS	NM_018081	55135	WRAP53	WD repeat containing, antisense to TP53
TRCN0000000316	TRPS0000313312	GACCGCTTTCTTACCTGTTTA	NM_018371.x-2980s1c1	3UTR	NM_018371	55790	CSGALNACT1	chondroitin sulfate N-acetylgalactosaminyltransferase 1
TRCN0000000317	TRPS0000272916	GCTCATCTTATTTCGACCATT	NM_018371.x-1056s1c1	CDS	NM_018371	55790	CSGALNACT1	chondroitin sulfate N-acetylgalactosaminyltransferase 1
TRCN0000000318	TRPS0000012169	AGCTGGTCATAAAGAAGGAAA	NM_018371.x-1565s1c1	CDS	NM_018371	55790	CSGALNACT1	chondroitin sulfate N-acetylgalactosaminyltransferase 1
TRCN0000000319	TRPS0000166710	CTGTGCTATCTCTGTCCTGTA	NM_018371.x-411s1c1	CDS	NM_018371	55790	CSGALNACT1	chondroitin sulfate N-acetylgalactosaminyltransferase 1
TRCN0000000320	TRPS0000148105	CTTCATCAATATAGGTGGGTT	NM_018371.x-1638s1c1	CDS	NM_018371	55790	CSGALNACT1	chondroitin sulfate N-acetylgalactosaminyltransferase 1
TRCN0000000321	TRPS0000036308	TGAACTGACAACAATCCTGAA	NM_018455.x-802s1c1	CDS	NM_018455	55839	CENPN	centromere protein N
TRCN0000000322	TRPS0000015556	ATGAGTAAAGGACCAGGTGAA	NM_018455.x-1007s1c1	CDS	NM_018455	55839	CENPN	centromere protein N
TRCN0000000323	TRPS0000011770	ACAGTACACAAAGCCAAACCA	NM_018455.x-1162s1c1	CDS	NM_018455	55839	CENPN	centromere protein N
TRCN0000000324	TRPS0000006585	AGAGAAACTGAGGAGAATGCA	NM_018455.x-1115s1c1	CDS	NM_018455	55839	CENPN	centromere protein N
TRCN0000000325	TRPS0000332797	GATGAGTAAAGGACCAGGTGA	NM_018455.x-1006s1c1	CDS	NM_018455	55839	CENPN	centromere protein N
TRCN0000000326	TRPS0000059989	CAGACGGAAGGGTAAACAATA	NM_018960.x-1031s1c1	3UTR	NM_018960	27232	GNMT	glycine N-methyltransferase
TRCN0000000327	TRPS0000230269	CCAAACCTACATTCCCTGCTA	NM_018960.x-847s1c1	CDS	NM_018960	27232	GNMT	glycine N-methyltransferase
TRCN0000000328	TRPS0000325103	GATAGTGAACAACAAGGCCCA	NM_018960.x-640s1c1	CDS	NM_018960	27232	GNMT	glycine N-methyltransferase
TRCN0000000329	TRPS0000198048	CATTCCCTGCTACTTCATCCA	NM_018960.x-856s1c1	CDS	NM_018960	27232	GNMT	glycine N-methyltransferase
TRCN0000000330	TRPS0000127316	CCTACATTCCCTGCTACTTCA	NM_018960.x-852s1c1	CDS	NM_018960	27232	GNMT	glycine N-methyltransferase
TRCN0000000331	TRPS0000336259	GTCCCTATGAATTGTACGTTT	NM_020182.x-4368s1c1	3UTR	NM_020182	56937	PMEPA1	prostate transmembrane protein, androgen induced 1
TRCN0000000332	TRPS0000000651	ATCACGGAGCTGGAGTTTGTT	NM_020182.x-426s1c1	CDS	NM_020182	56937	PMEPA1	prostate transmembrane protein, androgen induced 1
TRCN0000000333	TRPS0000251831	GATAAACAGAAAGGACACCCT	NM_020182.x-1158s1c1	CDS	NM_020182	56937	PMEPA1	prostate transmembrane protein, androgen induced 1
TRCN0000000334	TRPS0000364828	GAGCAAAGAGAAGGATAAACA	NM_020182.x-1145s1c1	CDS	NM_020182	56937	PMEPA1	prostate transmembrane protein, androgen induced 1
TRCN0000000335	TRPS0000380472	GAGTTTGTTCAGATCATCATC	NM_020182.x-438s1c1	CDS	NM_020182	56937	PMEPA1	prostate transmembrane protein, androgen induced 1
TRCN0000000336	TRPS0000021291	TGAGGCCATGAACAGAACTTA	NM_023078.x-1183s1c1	3UTR	NM_023078	65263	PYCRL	pyrroline-5-carboxylate reductase-like
TRCN0000000337	TRPS0000155133	CACCAACAGACAGGAACCTAT	NM_023078.x-151s1c1	CDS	NM_023078	65263	PYCRL	pyrroline-5-carboxylate reductase-like
TRCN0000000338	TRPS0000143938	CATGAACAGAACTTACGGTAA	NM_023078.x-1189s1c1	3UTR	NM_023078	65263	PYCRL	pyrroline-5-carboxylate reductase-like
TRCN0000000339	TRPS0000153682	CCATGAACAGAACTTACGGTA	NM_023078.x-1188s1c1	3UTR	NM_023078	65263	PYCRL	pyrroline-5-carboxylate reductase-like
TRCN0000000340	TRPS0000031294	TGCTCTCTCTTACTCTCCTGA	NM_023078.x-2156s1c1	3UTR	NM_023078	65263	PYCRL	pyrroline-5-carboxylate reductase-like
TRCN0000000341	TRPS0000134303	CTAAGGAGATGGGAATAAAGA	NM_023078.x-2280s1c1	3UTR	NM_023078	65263	PYCRL	pyrroline-5-carboxylate reductase-like
TRCN0000000342	TRPS0000359919	GCCATGAACAGAACTTACGGT	NM_023078.x-1187s1c1	3UTR	NM_023078	65263	PYCRL	pyrroline-5-carboxylate reductase-like
TRCN0000000343	TRPS0000320175	GAGGCCATGAACAGAACTTAC	NM_023078.x-1184s1c1	3UTR	NM_023078	65263	PYCRL	pyrroline-5-carboxylate reductase-like
TRCN0000000344	TRPS0000014202	ATGAACAGAACTTACGGTAAC	NM_023078.x-1190s1c1	3UTR	NM_023078	65263	PYCRL	pyrroline-5-carboxylate reductase-like
TRCN0000000345	TRPS0000009103	AGGCCATGAACAGAACTTACG	NM_023078.x-1185s1c1	3UTR	NM_023078	65263	PYCRL	pyrroline-5-carboxylate reductase-like
TRCN0000000346	TRPS0000007769	ATCTGCTCTCTCTTACTCTCC	NM_023078.x-2153s1c1	3UTR	NM_023078	65263	PYCRL	pyrroline-5-carboxylate reductase-like
TRCN0000000347	TRPS0000023864	TAAGGAGATGGGAATAAAGAG	NM_023078.x-2281s1c1	3UTR	NM_023078	65263	PYCRL	pyrroline-5-carboxylate reductase-like
TRCN0000000348	TRPS0000002014	ATCCTAAGCTCCTGACAAGTG	NM_023078.x-1629s1c1	3UTR	NM_023078	65263	PYCRL	pyrroline-5-carboxylate reductase-like
TRCN0000000349	TRPS0000006980	AGTAGTTATGTTGCTGTGAAA	NM_023929.x-3246s1c1	3UTR	NM_023929	65986	ZBTB10	zinc finger and BTB domain containing 10
TRCN0000000350	TRPS0000207502	CTTTGCTGAATTTGGAACGCT	NM_005782.x-402s1c1	CDS	NM_005782	10189	THOC4	THO complex 4
TRCN0000000351	TRPS0000028787	TCAGACGCCGATATTCAGGAA	NM_005782.x-379s1c1	CDS	NM_005782	10189	THOC4	THO complex 4
TRCN0000000352	TRPS0000347587	GAACTCTTTGCTGAATTTGGA	NM_005782.x-397s1c1	CDS	NM_005782	10189	THOC4	THO complex 4
TRCN0000000353	TRPS0000008928	ACTATGATCGCTCTGGTCGCA	NM_005782.x-440s1c1	CDS	NM_005782	10189	THOC4	THO complex 4
TRCN0000000354	TRPS0000217137	CTGCGGATCAAGAAGACACTA	NM_000020.x-1729s1c1	CDS	NM_000020	94	ACVRL1	activin A receptor type II-like 1
TRCN0000000355	TRPS0000027995	TCCAGAGAAGCCTAAAGTGAT	NM_000020.x-1767s1c1	CDS	NM_000020	94	ACVRL1	activin A receptor type II-like 1
TRCN0000000356	TRPS0000074570	CAGTCCAGAGAAGCCTAAAGT	NM_000020.x-1764s1c1	CDS	NM_000020	94	ACVRL1	activin A receptor type II-like 1
TRCN0000000357	TRPS0000014201	ATTACCTGGACATCGGCAACA	NM_000020.x-1361s1c1	CDS	NM_000020	94	ACVRL1	activin A receptor type II-like 1
TRCN0000000358	TRPS0000384140	GTGGACCGAATTTGGCAAGAA	NM_000061.x-2490s1c1	3UTR	NM_000061	695	BTK	Bruton agammaglobulinemia tyrosine kinase
TRCN0000000359	TRPS0000047212	CCCAACTGAAGAACTAAGGAA	NM_000061.x-508s1c1	CDS	NM_000061	695	BTK	Bruton agammaglobulinemia tyrosine kinase
TRCN0000000360	TRPS0000228978	CCAATGAATGCAAATGATCTA	NM_000061.x-842s1c1	CDS	NM_000061	695	BTK	Bruton agammaglobulinemia tyrosine kinase
TRCN0000000361	TRPS0000258213	GAAGCAGAAGACTCCATAGAA	NM_000061.x-974s1c1	CDS	NM_000061	695	BTK	Bruton agammaglobulinemia tyrosine kinase
TRCN0000000362	TRPS0000233528	CCTTCCCATTTCTCTACACTA	NM_000075.x-1320s1c1	3UTR	NM_000075	1019	CDK4	cyclin-dependent kinase 4
TRCN0000000363	TRPS0000076341	CCTAGATTTCCTTCATGCCAA	NM_000075.x-608s1c1	CDS	NM_000075	1019	CDK4	cyclin-dependent kinase 4
TRCN0000000364	TRPS0000250763	GAAATTGGTGTCGGTGCCTAT	NM_000075.x-258s1c1	CDS	NM_000075	1019	CDK4	cyclin-dependent kinase 4
TRCN0000000365	TRPS0000006502	AGGACATATCTGGACAAGGCA	NM_000075.x-528s1c1	CDS	NM_000075	1019	CDK4	cyclin-dependent kinase 4
TRCN0000000366	TRPS0000373754	GCACACACTTACAGAGCACAA	NM_000141.x-3402s1c1	3UTR	NM_000141	2263	FGFR2	fibroblast growth factor receptor 2
TRCN0000000367	TRPS0000362362	GCCACCAACCAAATACCAAAT	NM_000141.x-703s1c1	CDS	NM_000141	2263	FGFR2	fibroblast growth factor receptor 2
TRCN0000000368	TRPS0000044607	CCGAATGAAGAACACGACCAA	NM_000141.x-1786s1c1	CDS	NM_000141	2263	FGFR2	fibroblast growth factor receptor 2
TRCN0000000369	TRPS0000109431	CCCAACAATAGGACAGTGCTT	NM_000141.x-833s1c1	CDS	NM_000141	2263	FGFR2	fibroblast growth factor receptor 2
TRCN0000000370	TRPS0000257893	GCCAACCTCTCGAACAGTATT	NM_000141.x-2910s1c1	CDS	NM_000141	2263	FGFR2	fibroblast growth factor receptor 2
TRCN0000000371	TRPS0000382624	GTTCCGATGTTATTAGATGTT	NM_000142.x-3699s1c1	3UTR	NM_000142	2261	FGFR3	fibroblast growth factor receptor 3
TRCN0000000372	TRPS0000025253	TGCGTCGTGGAGAACAAGTTT	NM_000142.x-721s1c1	CDS	NM_000142	2261	FGFR3	fibroblast growth factor receptor 3
TRCN0000000373	TRPS0000176687	CTCGACTACTACAAGAAGACA	NM_000142.x-1972s1c1	CDS	NM_000142	2261	FGFR3	fibroblast growth factor receptor 3
TRCN0000000374	TRPS0000269765	GCACAACCTCGACTACTACAA	NM_000142.x-1965s1c1	CDS	NM_000142	2261	FGFR3	fibroblast growth factor receptor 3
TRCN0000000375	TRPS0000278150	GGTGGGTGAAATAAAGGCATA	NM_000180.x-3594s1c1	3UTR	NM_000180	3000	GUCY2D	guanylate cyclase 2D, membrane (retina-specific)
TRCN0000000376	TRPS0000103669	CGTCTTTAGCTTGGCCATCAT	NM_000180.x-2257s1c1	CDS	NM_000180	3000	GUCY2D	guanylate cyclase 2D, membrane (retina-specific)
TRCN0000000377	TRPS0000050100	CAACGATCTCTACACACTCTT	NM_000180.x-2788s1c1	CDS	NM_000180	3000	GUCY2D	guanylate cyclase 2D, membrane (retina-specific)
TRCN0000000378	TRPS0000070862	CCGGAAGACGAACATCATTGA	NM_000180.x-2506s1c1	CDS	NM_000180	3000	GUCY2D	guanylate cyclase 2D, membrane (retina-specific)
TRCN0000000379	TRPS0000387683	GCTCTGTTACTTGGCCACTAT	NM_000208.x-559s1c1	CDS	NM_000208	3643	INSR	insulin receptor
TRCN0000000380	TRPS0000346466	GTGCTGTATGAAGTGAGTTAT	NM_000208.x-2750s1c1	CDS	NM_000208	3643	INSR	insulin receptor
TRCN0000000381	TRPS0000157228	CACTGATTACTTGCTGCTCTT	NM_000208.x-358s1c1	CDS	NM_000208	3643	INSR	insulin receptor
TRCN0000000382	TRPS0000075458	CAGTGTTGTGATTGGAAGTAT	NM_000208.x-3010s1c1	CDS	NM_000208	3643	INSR	insulin receptor
TRCN0000000383	TRPS0000150742	CAAAGAAGCAAGGAACCAAAT	NM_000215.x-3709s1c1	3UTR	NM_000215	3718	JAK3	Janus kinase 3
TRCN0000000384	TRPS0000188139	CCAGGACAGACAACCAGATTT	NM_000215.x-1057s1c1	CDS	NM_000215	3718	JAK3	Janus kinase 3
TRCN0000000385	TRPS0000033281	TCCTGCTAAGAAACTCCAATT	NM_000215.x-2285s1c1	CDS	NM_000215	3718	JAK3	Janus kinase 3
TRCN0000000386	TRPS0000211980	CTCTTCACCTACTGCGACAAA	NM_000215.x-3153s1c1	CDS	NM_000215	3718	JAK3	Janus kinase 3
TRCN0000000387	TRPS0000048909	CAGCGCCTATCTTTCTCCTTT	NM_000215.x-210s1c1	CDS	NM_000215	3718	JAK3	Janus kinase 3
TRCN0000000388	TRPS0000094528	CCATAAGGTTTCGTTTCTGTA	NM_000222.x-3671s1c1	3UTR	NM_000222	3815	KIT	v-kit Hardy-Zuckerman 4 feline sarcoma viral oncogene homolog
TRCN0000000389	TRPS0000242259	GCGACGAGATTAGGCTGTTAT	NM_000222.x-173s1c1	CDS	NM_000222	3815	KIT	v-kit Hardy-Zuckerman 4 feline sarcoma viral oncogene homolog
TRCN0000000390	TRPS0000347080	GCACCAACAAACACGGCTTAA	NM_000222.x-311s1c1	CDS	NM_000222	3815	KIT	v-kit Hardy-Zuckerman 4 feline sarcoma viral oncogene homolog
TRCN0000000391	TRPS0000319480	GCCGGTCGATTCTAAGTTCTA	NM_000222.x-2640s1c1	CDS	NM_000222	3815	KIT	v-kit Hardy-Zuckerman 4 feline sarcoma viral oncogene homolog
TRCN0000000392	TRPS0000310197	GCACGGTTGAATGTAAGGCTT	NM_000222.x-1481s1c1	CDS	NM_000222	3815	KIT	v-kit Hardy-Zuckerman 4 feline sarcoma viral oncogene homolog
TRCN0000000393	TRPS0000034495	TCGATATTCTTTGCTCCTTGC	NM_000245.x-4490s1c1	3UTR	NM_000245	4233	MET	met proto-oncogene (hepatocyte growth factor receptor)
TRCN0000000394	TRPS0000209234	CCAATTTATCAGGAGGTGTTT	NM_000245.x-502s1c1	CDS	NM_000245	4233	MET	met proto-oncogene (hepatocyte growth factor receptor)
TRCN0000000395	TRPS0000167477	CAGAAGTGATTGTGGAGCATA	NM_000245.x-1651s1c1	CDS	NM_000245	4233	MET	met proto-oncogene (hepatocyte growth factor receptor)
TRCN0000000396	TRPS0000089404	CTGTTATTACTACTTGGGTTT	NM_000245.x-3075s1c1	CDS	NM_000245	4233	MET	met proto-oncogene (hepatocyte growth factor receptor)
TRCN0000000397	TRPS0000067945	CACTGCTTTAATAGGACACTT	NM_000245.x-1374s1c1	CDS	NM_000245	4233	MET	met proto-oncogene (hepatocyte growth factor receptor)
TRCN0000000398	TRPS0000107294	CTAATGATCCTGCTACCCTCT	NM_000294.x-1406s1c1	3UTR	NM_000294	5261	PHKG2	phosphorylase kinase, gamma 2 (testis)
TRCN0000000399	TRPS0000022352	TCTGCTGCTATAACTGAGGAT	NM_000294.x-1270s1c1	CDS	NM_000294	5261	PHKG2	phosphorylase kinase, gamma 2 (testis)
TRCN0000000400	TRPS0000188831	CGTTGTGTTCATCGAGCTACT	NM_000294.x-211s1c1	CDS	NM_000294	5261	PHKG2	phosphorylase kinase, gamma 2 (testis)
TRCN0000000401	TRPS0000049405	CGCCAGAGATCCTTAAATGCT	NM_000294.x-677s1c1	CDS	NM_000294	5261	PHKG2	phosphorylase kinase, gamma 2 (testis)
TRCN0000000402	TRPS0000029963	TGGCTCTAATTTGGGCTGTTT	NM_000323.x-3874s1c1	3UTR	NM_000323	5979	RET	ret proto-oncogene
TRCN0000000403	TRPS0000234962	CGAGATGTTTATGAAGAGGAT	NM_000323.x-2884s1c1	CDS	NM_000323	5979	RET	ret proto-oncogene
TRCN0000000404	TRPS0000077186	CCGCTGGTGGACTGTAATAAT	NM_000323.x-3310s1c1	CDS	NM_000323	5979	RET	ret proto-oncogene
TRCN0000000405	TRPS0000299370	GCTGCATGAGAACAACTGGAT	NM_000323.x-432s1c1	CDS	NM_000323	5979	RET	ret proto-oncogene
TRCN0000000406	TRPS0000364165	GAGACCCAAGACATCAACATT	NM_000323.x-1915s1c1	CDS	NM_000323	5979	RET	ret proto-oncogene
TRCN0000000407	TRPS0000277587	GAGTGTGCGGTCAATATTTAT	NM_000455.x-2281s1c1	3UTR	NM_000455	6794	STK11	serine/threonine kinase 11
TRCN0000000408	TRPS0000364848	GCCAACGTGAAGAAGGAAATT	NM_000455.x-548s1c1	CDS	NM_000455	6794	STK11	serine/threonine kinase 11
TRCN0000000409	TRPS0000244162	GATCCTCAAGAAGAAGAAGTT	NM_000455.x-505s1c1	CDS	NM_000455	6794	STK11	serine/threonine kinase 11
TRCN0000000410	TRPS0000323591	GAAGAAGAAGTTGCGAAGGAT	NM_000455.x-514s1c1	CDS	NM_000455	6794	STK11	serine/threonine kinase 11
TRCN0000000411	TRPS0000069528	CATCTACACTCAGGACTTCAC	NM_000455.x-1351s1c1	CDS	NM_000455	6794	STK11	serine/threonine kinase 11
TRCN0000000412	TRPS0000028713	TGGGTGACATTTGGGAGACAT	NM_000459.x-3961s1c1	3UTR	NM_000459	7010	TEK	TEK tyrosine kinase, endothelial
TRCN0000000413	TRPS0000365663	GCTACCTACTAATGAAGAAAT	NM_000459.x-1276s1c1	CDS	NM_000459	7010	TEK	TEK tyrosine kinase, endothelial
TRCN0000000414	TRPS0000172824	CGCTACCTACTAATGAAGAAA	NM_000459.x-1275s1c1	CDS	NM_000459	7010	TEK	TEK tyrosine kinase, endothelial
TRCN0000000415	TRPS0000382819	GCTTCTATACAAACCCGTTAA	NM_000459.x-1588s1c1	CDS	NM_000459	7010	TEK	TEK tyrosine kinase, endothelial
TRCN0000000416	TRPS0000098370	CCTACCAGCTACTTTAACTAT	NM_000459.x-520s1c1	CDS	NM_000459	7010	TEK	TEK tyrosine kinase, endothelial
TRCN0000000417	TRPS0000078646	CGTTACCAGAGATTTACCCAT	NM_000604.x-3887s1c1	3UTR	NM_000604	2260	FGFR1	fibroblast growth factor receptor 1
TRCN0000000418	TRPS0000091903	CGAGGCATTATTTGACCGGAT	NM_000604.x-2733s1c1	CDS	NM_000604	2260	FGFR1	fibroblast growth factor receptor 1
TRCN0000000419	TRPS0000059395	CAGAGGAGAAAGAAACAGATA	NM_000604.x-1133s1c1	CDS	NM_000604	2260	FGFR1	fibroblast growth factor receptor 1
TRCN0000000420	TRPS0000219739	CGTCAATGTTTCAGATGCTCT	NM_000604.x-1071s1c1	CDS	NM_000604	2260	FGFR1	fibroblast growth factor receptor 1
TRCN0000000421	TRPS0000006539	AGGGCTGGAATACTGCTACAA	NM_000604.x-2463s1c1	CDS	NM_000604	2260	FGFR1	fibroblast growth factor receptor 1
TRCN0000000422	TRPS0000152233	CCTTAACTGACATGGGCCTTT	NM_000875.x-4369s1c1	3UTR	NM_000875	3480	IGF1R	insulin-like growth factor 1 receptor
TRCN0000000423	TRPS0000360586	GCTACCTTTACCGGCACAATT	NM_000875.x-2009s1c1	CDS	NM_000875	3480	IGF1R	insulin-like growth factor 1 receptor
TRCN0000000424	TRPS0000287421	GCTGATGTGTACGTTCCTGAT	NM_000875.x-2995s1c1	CDS	NM_000875	3480	IGF1R	insulin-like growth factor 1 receptor
TRCN0000000425	TRPS0000100002	CCTTGGACGTTCTTTCAGCAT	NM_000875.x-1886s1c1	CDS	NM_000875	3480	IGF1R	insulin-like growth factor 1 receptor
TRCN0000000426	TRPS0000135759	CCAAGCCTGAGCAAGATGATT	NM_000875.x-3364s1c1	CDS	NM_000875	3480	IGF1R	insulin-like growth factor 1 receptor
TRCN0000000427	TRPS0000055380	CGAATGGAGTCTAATGGTCAA	NM_000907.x-3036s1c1	3UTR	NM_000907	4882	NPR2	natriuretic peptide receptor B/guanylate cyclase B (atrionatriuretic peptide receptor B)
TRCN0000000428	TRPS0000193961	CGTGGGAGTTTACAGGATATT	NM_000907.x-1801s1c1	CDS	NM_000907	4882	NPR2	natriuretic peptide receptor B/guanylate cyclase B (atrionatriuretic peptide receptor B)
TRCN0000000429	TRPS0000332848	GCTCTGCTCTACCAAATCCTA	NM_000907.x-2494s1c1	CDS	NM_000907	4882	NPR2	natriuretic peptide receptor B/guanylate cyclase B (atrionatriuretic peptide receptor B)
TRCN0000000430	TRPS0000224232	CACTTCTTAATGACCTGTATA	NM_000907.x-2651s1c1	CDS	NM_000907	4882	NPR2	natriuretic peptide receptor B/guanylate cyclase B (atrionatriuretic peptide receptor B)
TRCN0000000431	TRPS0000084662	CTTCATCAACTCCTCGCATAA	NM_000932.x-978s1c1	CDS	NM_000932	5331	PLCB3	phospholipase C, beta 3 (phosphatidylinositol-specific)
TRCN0000000432	TRPS0000006506	AGAGATGAACGAGAGGGAGAA	NM_000932.x-3252s1c1	CDS	NM_000932	5331	PLCB3	phospholipase C, beta 3 (phosphatidylinositol-specific)
TRCN0000000433	TRPS0000103671	CTATGTTCTTGGACCTGCTGA	NM_000932.x-1641s1c1	CDS	NM_000932	5331	PLCB3	phospholipase C, beta 3 (phosphatidylinositol-specific)
TRCN0000000434	TRPS0000283251	GATGTCCACGCTTGTCAACTA	NM_000932.x-1767s1c1	CDS	NM_000932	5331	PLCB3	phospholipase C, beta 3 (phosphatidylinositol-specific)
TRCN0000000435	TRPS0000038473	TGTTTGGCCTCCCTGTTGATA	NM_000932.x-2252s1c1	CDS	NM_000932	5331	PLCB3	phospholipase C, beta 3 (phosphatidylinositol-specific)
TRCN0000000436	TRPS0000183227	CAGGCGTAGATCACCAGAATA	NM_001079.x-2393s1c1	3UTR	NM_001079	7535	ZAP70	zeta-chain (TCR) associated protein kinase 70kDa
TRCN0000000437	TRPS0000247306	GAAGCCCTACAAGAAGATGAA	NM_001079.x-1820s1c1	CDS	NM_001079	7535	ZAP70	zeta-chain (TCR) associated protein kinase 70kDa
TRCN0000000438	TRPS0000156884	CCCTCAACTCAGATGGATACA	NM_001079.x-1066s1c1	CDS	NM_001079	7535	ZAP70	zeta-chain (TCR) associated protein kinase 70kDa
TRCN0000000439	TRPS0000036526	TACCACTACCTCATCAGCCAA	NM_001079.x-834s1c1	CDS	NM_001079	7535	ZAP70	zeta-chain (TCR) associated protein kinase 70kDa
TRCN0000000440	TRPS0000150961	CGATAACCTCCTCATAGCTGA	NM_001079.x-1211s1c1	CDS	NM_001079	7535	ZAP70	zeta-chain (TCR) associated protein kinase 70kDa
TRCN0000000441	TRPS0000245570	GCAGAACGTATTTAGCCATTA	NM_001105.x-2723s1c1	3UTR	NM_001105	90	ACVR1	activin A receptor, type I
TRCN0000000442	TRPS0000057288	CGGATGGTGAGCAATGGTATA	NM_001105.x-1589s1c1	CDS	NM_001105	90	ACVR1	activin A receptor, type I
TRCN0000000443	TRPS0000342511	GACAGCACTTTAGCAGATTTA	NM_001105.x-869s1c1	CDS	NM_001105	90	ACVR1	activin A receptor, type I
TRCN0000000444	TRPS0000174719	CTAATGAAAGAATGCTGGTAT	NM_001105.x-1757s1c1	CDS	NM_001105	90	ACVR1	activin A receptor, type I
TRCN0000000445	TRPS0000281885	GTGGATTGTTTCGATTCTTAT	NM_001105.x-1517s1c1	CDS	NM_001105	90	ACVR1	activin A receptor, type I
TRCN0000000446	TRPS0000027420	TGGAACGAACTGTGTCATGTA	NM_001106.x-854s1c1	CDS	NM_001106	93	ACVR2B	activin A receptor, type IIB
TRCN0000000447	TRPS0000211628	CTTTGGCTTGGCTGTTCGATT	NM_001106.x-1021s1c1	CDS	NM_001106	93	ACVR2B	activin A receptor, type IIB
TRCN0000000448	TRPS0000132675	CTGCTGGCTAGATGACTTCAA	NM_001106.x-232s1c1	CDS	NM_001106	93	ACVR2B	activin A receptor, type IIB
TRCN0000000449	TRPS0000233193	CAACTTCCAGAGAGATGCCTT	NM_001106.x-1126s1c1	CDS	NM_001106	93	ACVR2B	activin A receptor, type IIB
TRCN0000000450	TRPS0000286590	GAGGCCCACCATTAAAGATCA	NM_001106.x-1312s1c1	CDS	NM_001106	93	ACVR2B	activin A receptor, type IIB
TRCN0000000451	TRPS0000287820	GACATCAAATAAGCATCCACA	NM_001203.x-1852s1c1	3UTR	NM_001203	658	BMPR1B	bone morphogenetic protein receptor, type IB
TRCN0000000452	TRPS0000227219	CGGATATTGTTTCACGATGAT	NM_001203.x-423s1c1	CDS	NM_001203	658	BMPR1B	bone morphogenetic protein receptor, type IB
TRCN0000000453	TRPS0000082503	CCTCGATACAGCATTGGGTTA	NM_001203.x-742s1c1	CDS	NM_001203	658	BMPR1B	bone morphogenetic protein receptor, type IB
TRCN0000000454	TRPS0000292461	GACGAGAGCTTGAACAGAAAT	NM_001203.x-1423s1c1	CDS	NM_001203	658	BMPR1B	bone morphogenetic protein receptor, type IB
TRCN0000000455	TRPS0000023991	TCAGGAGGTATAGTGGAAGAA	NM_001203.x-1519s1c1	CDS	NM_001203	658	BMPR1B	bone morphogenetic protein receptor, type IB
TRCN0000000456	TRPS0000270826	GCCTATGGAGTGAAATTATTT	NM_001204.x-3537s1c1	3UTR	NM_001204	659	BMPR2	bone morphogenetic protein receptor, type II (serine/threonine kinase)
TRCN0000000457	TRPS0000383177	GCCCGCTTTATAGTTGGAGAT	NM_001204.x-1180s1c1	CDS	NM_001204	659	BMPR2	bone morphogenetic protein receptor, type II (serine/threonine kinase)
TRCN0000000458	TRPS0000190810	CGCAGAATCAAGAACGGCTAT	NM_001204.x-488s1c1	CDS	NM_001204	659	BMPR2	bone morphogenetic protein receptor, type II (serine/threonine kinase)
TRCN0000000459	TRPS0000355577	GCCGTCTTGCTCATTCTGTTA	NM_001204.x-1313s1c1	CDS	NM_001204	659	BMPR2	bone morphogenetic protein receptor, type II (serine/threonine kinase)
TRCN0000000460	TRPS0000080399	CAATCCAATGTCTACTGCTAT	NM_001204.x-1962s1c1	CDS	NM_001204	659	BMPR2	bone morphogenetic protein receptor, type II (serine/threonine kinase)
TRCN0000000461	TRPS0000055568	CTGAAACTGTATGTGCTGTAA	NM_001211.x-3346s1c1	3UTR	NM_001211	701	BUB1B	budding uninhibited by benzimidazoles 1 homolog beta (yeast)
TRCN0000000462	TRPS0000381859	GCGTTTATGCAATGAGCCTTT	NM_001211.x-521s1c1	CDS	NM_001211	701	BUB1B	budding uninhibited by benzimidazoles 1 homolog beta (yeast)
TRCN0000000463	TRPS0000077356	CCAGTGTACCTTTCTCCATTT	NM_001211.x-1705s1c1	CDS	NM_001211	701	BUB1B	budding uninhibited by benzimidazoles 1 homolog beta (yeast)
TRCN0000000464	TRPS0000271910	GAGACAACTAAACTGCAAATT	NM_001211.x-1560s1c1	CDS	NM_001211	701	BUB1B	budding uninhibited by benzimidazoles 1 homolog beta (yeast)
TRCN0000000465	TRPS0000149917	CCTCAGAAAGCATCACCTCAA	NM_001211.x-1822s1c1	CDS	NM_001211	701	BUB1B	budding uninhibited by benzimidazoles 1 homolog beta (yeast)
TRCN0000000466	TRPS0000275979	GACCAGATGTGATTTGTTAAA	NM_001220.x-2338s1c1	3UTR	NM_001220	816	CAMK2B	calcium/calmodulin-dependent protein kinase II beta
TRCN0000000467	TRPS0000363932	GATCATTAAGACCACGGAGCA	NM_001220.x-1815s1c1	CDS	NM_001220	816	CAMK2B	calcium/calmodulin-dependent protein kinase II beta
TRCN0000000468	TRPS0000082132	CTCAAACCACCGTCATCCATA	NM_001220.x-1340s1c1	CDS	NM_001220	816	CAMK2B	calcium/calmodulin-dependent protein kinase II beta
TRCN0000000469	TRPS0000004395	ACAAGAAAGCAGATGGAGTCA	NM_001220.x-1241s1c1	CDS	NM_001220	816	CAMK2B	calcium/calmodulin-dependent protein kinase II beta
TRCN0000000470	TRPS0000002375	ATCTCTGACATCCTGAACTCT	NM_001220.x-1681s1c1	CDS	NM_001220	816	CAMK2B	calcium/calmodulin-dependent protein kinase II beta
TRCN0000000471	TRPS0000064612	CTTCTGCATTCTCTGTTCTCA	NM_001221.x-2053s1c1	3UTR	NM_001221	817	CAMK2D	calcium/calmodulin-dependent protein kinase II delta
TRCN0000000472	TRPS0000327953	GCAATAAACCAATCCACACTA	NM_001221.x-1721s1c1	CDS	NM_001221	817	CAMK2D	calcium/calmodulin-dependent protein kinase II delta
TRCN0000000473	TRPS0000077305	CTTACTATCAACCCTGCCAAA	NM_001221.x-1261s1c1	CDS	NM_001221	817	CAMK2D	calcium/calmodulin-dependent protein kinase II delta
TRCN0000000474	TRPS0000054088	CAGATGGAGTAAAGGAGTCAA	NM_001221.x-1475s1c1	CDS	NM_001221	817	CAMK2D	calcium/calmodulin-dependent protein kinase II delta
TRCN0000000475	TRPS0000023361	TGTGGTGTCATTCTCTATATT	NM_001221.x-1102s1c1	CDS	NM_001221	817	CAMK2D	calcium/calmodulin-dependent protein kinase II delta
TRCN0000000476	TRPS0000076015	CGTTGCTGTACTGTCTTGTTT	NM_001222.x-2251s1c1	3UTR	NM_001222	818	CAMK2G	calcium/calmodulin-dependent protein kinase II gamma
TRCN0000000477	TRPS0000002625	ACCTCGTGTTTGACCTTGTTA	NM_001222.x-379s1c1	CDS	NM_001222	818	CAMK2G	calcium/calmodulin-dependent protein kinase II gamma
TRCN0000000478	TRPS0000017831	AGAACAGCAAGCCTATCCATA	NM_001222.x-1384s1c1	CDS	NM_001222	818	CAMK2G	calcium/calmodulin-dependent protein kinase II gamma
TRCN0000000479	TRPS0000015721	ACACAACGCTACAGATGGGAT	NM_001222.x-1130s1c1	CDS	NM_001222	818	CAMK2G	calcium/calmodulin-dependent protein kinase II gamma
TRCN0000000480	TRPS0000341852	GATCACCAGAAACTAGAACGT	NM_001222.x-279s1c1	CDS	NM_001222	818	CAMK2G	calcium/calmodulin-dependent protein kinase II gamma
TRCN0000000481	TRPS0000305737	GAGAGCAAAGCACTAAGGAAT	NM_001258.x-1097s1c1	3UTR	NM_001258	1018	CDK3	cyclin-dependent kinase 3
TRCN0000000482	TRPS0000326084	GCTCTTTCGTATCTTTCGTAT	NM_001258.x-721s1c1	CDS	NM_001258	1018	CDK3	cyclin-dependent kinase 3
TRCN0000000483	TRPS0000015217	AGCTCTTTCGTATCTTTCGTA	NM_001258.x-720s1c1	CDS	NM_001258	1018	CDK3	cyclin-dependent kinase 3
TRCN0000000484	TRPS0000383426	GCAAGTTCTATACCACAGCTG	NM_001258.x-618s1c1	CDS	NM_001258	1018	CDK3	cyclin-dependent kinase 3
TRCN0000000485	TRPS0000087841	CCACTGAAACCATAAAGGATA	NM_001259.x-468s1c1	CDS	NM_001259	1021	CDK6	cyclin-dependent kinase 6
TRCN0000000486	TRPS0000131356	CGAACAGACAGAGAAACCAAA	NM_001259.x-374s1c1	CDS	NM_001259	1021	CDK6	cyclin-dependent kinase 6
TRCN0000000487	TRPS0000364256	GAAGAAGACTGGCCTAGAGAT	NM_001259.x-833s1c1	CDS	NM_001259	1021	CDK6	cyclin-dependent kinase 6
TRCN0000000488	TRPS0000118599	CAGACAGAGAAACCAAACTAA	NM_001259.x-378s1c1	CDS	NM_001259	1021	CDK6	cyclin-dependent kinase 6
TRCN0000000489	TRPS0000002116	ATGTCCAGTAGCCAAGTTCCA	NM_001260.x-1537s1c1	3UTR	NM_001260	1024	CDK8	cyclin-dependent kinase 8
TRCN0000000490	TRPS0000300849	GCAGGGCAATAACCACACTAA	NM_001260.x-1154s1c1	CDS	NM_001260	1024	CDK8	cyclin-dependent kinase 8
TRCN0000000491	TRPS0000171992	CCTCTGGCATATAATCAAGTT	NM_001260.x-335s1c1	CDS	NM_001260	1024	CDK8	cyclin-dependent kinase 8
TRCN0000000492	TRPS0000088901	CAAGGCATTATACCAAAGCTA	NM_001260.x-649s1c1	CDS	NM_001260	1024	CDK8	cyclin-dependent kinase 8
TRCN0000000493	TRPS0000110273	CACTTCCTACATCAGACGTTT	NM_001260.x-1042s1c1	CDS	NM_001260	1024	CDK8	cyclin-dependent kinase 8
TRCN0000000494	TRPS0000352104	GCACAGTTTGGTCCGTTAGAA	NM_001261.x-1712s1c1	3UTR	NM_001261	1025	CDK9	cyclin-dependent kinase 9
TRCN0000000495	TRPS0000014292	AGGGACATGAAGGCTGCTAAT	NM_001261.x-540s1c1	CDS	NM_001261	1025	CDK9	cyclin-dependent kinase 9
TRCN0000000496	TRPS0000104127	CCGCTGCAAGGGTAGTATATA	NM_001261.x-377s1c1	CDS	NM_001261	1025	CDK9	cyclin-dependent kinase 9
TRCN0000000497	TRPS0000072422	CTACTACATCCACAGAAACAA	NM_001261.x-509s1c1	CDS	NM_001261	1025	CDK9	cyclin-dependent kinase 9
TRCN0000000498	TRPS0000027243	TGATTGAGATTTGTCGAACCA	NM_001261.x-340s1c1	CDS	NM_001261	1025	CDK9	cyclin-dependent kinase 9
TRCN0000000499	TRPS0000131326	CTGCAAATAGTAGTTCCTGAA	NM_001274.x-1679s1c1	3UTR	NM_001274	1111	CHEK1	CHK1 checkpoint homolog (S. pombe)
TRCN0000000500	TRPS0000138937	CGCAGTGAAGATTGTAGATAT	NM_001274.x-263s1c1	CDS	NM_001274	1111	CHEK1	CHK1 checkpoint homolog (S. pombe)
TRCN0000000501	TRPS0000361778	GCTGTGAATAGAGTAACTGAA	NM_001274.x-234s1c1	CDS	NM_001274	1111	CHEK1	CHK1 checkpoint homolog (S. pombe)
TRCN0000000502	TRPS0000320625	GTGGTTTATCTGCATGGTATT	NM_001274.x-510s1c1	CDS	NM_001274	1111	CHEK1	CHK1 checkpoint homolog (S. pombe)
TRCN0000000503	TRPS0000336693	GAAGATTAAAGGGAAGCTGAT	NM_001274.x-1526s1c1	CDS	NM_001274	1111	CHEK1	CHK1 checkpoint homolog (S. pombe)
TRCN0000000504	TRPS0000274628	GCATCATAAGGAGTTGGTGTA	NM_001278.x-2866s1c1	3UTR	NM_001278	1147	CHUK	conserved helix-loop-helix ubiquitous kinase
TRCN0000000505	TRPS0000171206	CCAGATTATGAAGAAGTTGAA	NM_001278.x-281s1c1	CDS	NM_001278	1147	CHUK	conserved helix-loop-helix ubiquitous kinase
TRCN0000000506	TRPS0000123169	CCAGCCTCTCAATGTGTTCTA	NM_001278.x-1194s1c1	CDS	NM_001278	1147	CHUK	conserved helix-loop-helix ubiquitous kinase
TRCN0000000507	TRPS0000382557	GCAAATGAGGAACAGGGCAAT	NM_001278.x-2274s1c1	CDS	NM_001278	1147	CHUK	conserved helix-loop-helix ubiquitous kinase
TRCN0000000508	TRPS0000282953	GCGTGCCATTGATCTATATAA	NM_001278.x-1781s1c1	CDS	NM_001278	1147	CHUK	conserved helix-loop-helix ubiquitous kinase
TRCN0000000509	TRPS0000383260	GCCGTATAGGATGTCAGACAA	NM_001315.x-3701s1c1	3UTR	NM_001315	1432	MAPK14	mitogen-activated protein kinase 14
TRCN0000000510	TRPS0000193948	CCATGTTCAGTTCCTTATCTA	NM_001315.x-737s1c1	CDS	NM_001315	1432	MAPK14	mitogen-activated protein kinase 14
TRCN0000000511	TRPS0000093379	CCATGAGGCAAGAAACTATAT	NM_001315.x-1118s1c1	CDS	NM_001315	1432	MAPK14	mitogen-activated protein kinase 14
TRCN0000000512	TRPS0000085461	CGAGGTCTAAAGTATATACAT	NM_001315.x-768s1c1	CDS	NM_001315	1432	MAPK14	mitogen-activated protein kinase 14
TRCN0000000513	TRPS0000081886	CCATTTCAGTCCATCATTCAT	NM_001315.x-534s1c1	CDS	NM_001315	1432	MAPK14	mitogen-activated protein kinase 14
TRCN0000000514	TRPS0000190669	CCAGCTAAACCAAGAGAGAAA	NM_001346.x-2908s1c1	3UTR	NM_001346	1608	DGKG	diacylglycerol kinase, gamma 90kDa
TRCN0000000515	TRPS0000129157	CTGAGCAACATCTTCCTGGAA	NM_001346.x-2455s1c1	CDS	NM_001346	1608	DGKG	diacylglycerol kinase, gamma 90kDa
TRCN0000000516	TRPS0000307215	GAAACCAACCTACTGCAACTT	NM_001346.x-1356s1c1	CDS	NM_001346	1608	DGKG	diacylglycerol kinase, gamma 90kDa
TRCN0000000517	TRPS0000086850	CAGCCATGTTGCACGATTAAA	NM_001346.x-2779s1c1	CDS	NM_001346	1608	DGKG	diacylglycerol kinase, gamma 90kDa
TRCN0000000518	TRPS0000271918	GATACTCCAGACTTCCGTGTT	NM_001346.x-1957s1c1	CDS	NM_001346	1608	DGKG	diacylglycerol kinase, gamma 90kDa
TRCN0000000519	TRPS0000233354	CAACCCACGAATCAAGCTCAT	NM_001348.x-552s1c1	CDS	NM_001348	1613	DAPK3	death-associated protein kinase 3
TRCN0000000520	TRPS0000052570	CATCGCACACTTTGACCTGAA	NM_001348.x-495s1c1	CDS	NM_001348	1613	DAPK3	death-associated protein kinase 3
TRCN0000000521	TRPS0000037030	TGTCATCACCTATATCCTCCT	NM_001348.x-705s1c1	CDS	NM_001348	1613	DAPK3	death-associated protein kinase 3
TRCN0000000522	TRPS0000371522	GAAGGAGTACACCATCAAGTC	NM_001348.x-999s1c1	CDS	NM_001348	1613	DAPK3	death-associated protein kinase 3
TRCN0000000523	TRPS0000097929	CCAGCAGTTGATTCTTGTATT	NM_001396.x-3947s1c1	3UTR	NM_001396	1859	DYRK1A	dual-specificity tyrosine-(Y)-phosphorylation regulated kinase 1A
TRCN0000000524	TRPS0000353603	GCTGCTAATACCTTGGACTTT	NM_001396.x-2131s1c1	CDS	NM_001396	1859	DYRK1A	dual-specificity tyrosine-(Y)-phosphorylation regulated kinase 1A
TRCN0000000525	TRPS0000182257	CAGTATATTCAGAGTCGCTTT	NM_001396.x-1033s1c1	CDS	NM_001396	1859	DYRK1A	dual-specificity tyrosine-(Y)-phosphorylation regulated kinase 1A
TRCN0000000526	TRPS0000048318	CGGAAGGTTTACAATGATGGT	NM_001396.x-472s1c1	CDS	NM_001396	1859	DYRK1A	dual-specificity tyrosine-(Y)-phosphorylation regulated kinase 1A
TRCN0000000527	TRPS0000233241	CTTTGGACAGAATGGAGCTAT	NM_001396.x-2148s1c1	CDS	NM_001396	1859	DYRK1A	dual-specificity tyrosine-(Y)-phosphorylation regulated kinase 1A
TRCN0000000528	TRPS0000078179	CTACTGGATAAACTTGCTTCA	NM_001433.x-3319s1c1	3UTR	NM_001433	2081	ERN1	endoplasmic reticulum to nucleus signaling 1
TRCN0000000529	TRPS0000130130	CCCATCAACCTCTCTTCTGTA	NM_001433.x-540s1c1	CDS	NM_001433	2081	ERN1	endoplasmic reticulum to nucleus signaling 1
TRCN0000000530	TRPS0000333420	GAGAAGATGATTGCGATGGAT	NM_001433.x-2524s1c1	CDS	NM_001433	2081	ERN1	endoplasmic reticulum to nucleus signaling 1
TRCN0000000531	TRPS0000105475	CTGGAACAAGACGATGGAGAT	NM_001433.x-1750s1c1	CDS	NM_001433	2081	ERN1	endoplasmic reticulum to nucleus signaling 1
TRCN0000000532	TRPS0000249814	GAAATACTCTACCAGCCTCTA	NM_001433.x-957s1c1	CDS	NM_001433	2081	ERN1	endoplasmic reticulum to nucleus signaling 1
TRCN0000000533	TRPS0000005816	AGGCAATGGGAAAGCTCACTT	NM_001522.x-3665s1c1	3UTR	NM_001522	2986	GUCY2F	guanylate cyclase 2F, retinal
TRCN0000000534	TRPS0000091081	CCTAGAAGACATACTGACAAA	NM_001522.x-2189s1c1	CDS	NM_001522	2986	GUCY2F	guanylate cyclase 2F, retinal
TRCN0000000535	TRPS0000011142	AGTTTGTTCATGGGAGGCTAA	NM_001522.x-2293s1c1	CDS	NM_001522	2986	GUCY2F	guanylate cyclase 2F, retinal
TRCN0000000536	TRPS0000281006	GTACACACTCTTTGATGCAAT	NM_001522.x-3035s1c1	CDS	NM_001522	2986	GUCY2F	guanylate cyclase 2F, retinal
TRCN0000000537	TRPS0000003348	ACCTACGTCTTTGTTCCTTAT	NM_001522.x-1122s1c1	CDS	NM_001522	2986	GUCY2F	guanylate cyclase 2F, retinal
TRCN0000000538	TRPS0000143137	CCAGACCATCATCCTCACATA	NM_001566.x-1188s1c1	CDS	NM_001566	3631	INPP4A	inositol polyphosphate-4-phosphatase, type I, 107kDa
TRCN0000000539	TRPS0000236895	CTCTCCGTGTATGATGTCAAA	NM_001566.x-643s1c1	CDS	NM_001566	3631	INPP4A	inositol polyphosphate-4-phosphatase, type I, 107kDa
TRCN0000000540	TRPS0000095111	CTCTTCAACGTGGGCATCAAT	NM_001566.x-2569s1c1	CDS	NM_001566	3631	INPP4A	inositol polyphosphate-4-phosphatase, type I, 107kDa
TRCN0000000541	TRPS0000127113	CTCTGTTCCATCCCTTTATTA	NM_001566.x-3061s1c1	CDS	NM_001566	3631	INPP4A	inositol polyphosphate-4-phosphatase, type I, 107kDa
TRCN0000000542	TRPS0000069111	CCGGAAGAATAAGAACGTCGA	NM_001566.x-2781s1c1	CDS	NM_001566	3631	INPP4A	inositol polyphosphate-4-phosphatase, type I, 107kDa
TRCN0000000543	TRPS0000143996	CCCTCCTACCTGCTTACAATT	NM_001569.x-2656s1c1	3UTR	NM_001569	3654	IRAK1	interleukin-1 receptor-associated kinase 1
TRCN0000000544	TRPS0000253746	GCCCGAAGAAAGTGATGAATT	NM_001569.x-2188s1c1	CDS	NM_001569	3654	IRAK1	interleukin-1 receptor-associated kinase 1
TRCN0000000545	TRPS0000084054	CGGGCAATTCAGTTTCTACAT	NM_001569.x-1049s1c1	CDS	NM_001569	3654	IRAK1	interleukin-1 receptor-associated kinase 1
TRCN0000000546	TRPS0000088433	CATTGTGGACTTTGCTGGCTA	NM_001569.x-889s1c1	CDS	NM_001569	3654	IRAK1	interleukin-1 receptor-associated kinase 1
TRCN0000000547	TRPS0000013727	AGGAGTACATCAAGACGGGAA	NM_001569.x-1257s1c1	CDS	NM_001569	3654	IRAK1	interleukin-1 receptor-associated kinase 1
TRCN0000000548	TRPS0000162833	CTGCAATGGATAACAACCGAA	NM_001570.x-1247s1c1	CDS	NM_001570	3656	IRAK2	interleukin-1 receptor-associated kinase 2
TRCN0000000549	TRPS0000015334	ACAGTTTCACAGCTTCATCTA	NM_001570.x-846s1c1	CDS	NM_001570	3656	IRAK2	interleukin-1 receptor-associated kinase 2
TRCN0000000550	TRPS0000032306	TGACAAAGCGAGTGGACATCT	NM_001570.x-1184s1c1	CDS	NM_001570	3656	IRAK2	interleukin-1 receptor-associated kinase 2
TRCN0000000551	TRPS0000022438	TACAGGCTCTTCTTCCAACAC	NM_001570.x-1563s1c1	CDS	NM_001570	3656	IRAK2	interleukin-1 receptor-associated kinase 2
TRCN0000000552	TRPS0000069903	CCTTAAATGAACTACTGCTAT	NM_001616.x-2060s1c1	3UTR	NM_001616	92	ACVR2A	activin A receptor, type IIA
TRCN0000000553	TRPS0000152873	CCAGATGCAGAGACTAACAAA	NM_001616.x-1603s1c1	CDS	NM_001616	92	ACVR2A	activin A receptor, type IIA
TRCN0000000554	TRPS0000333068	GCTAATGTGGTCTCTTGGAAT	NM_001616.x-1004s1c1	CDS	NM_001616	92	ACVR2A	activin A receptor, type IIA
TRCN0000000555	TRPS0000191341	CTATTACAACATCCTGCTCTA	NM_001616.x-568s1c1	CDS	NM_001616	92	ACVR2A	activin A receptor, type IIA
TRCN0000000556	TRPS0000195076	CAGGAAGTTGTTGTGCATAAA	NM_001616.x-1448s1c1	CDS	NM_001616	92	ACVR2A	activin A receptor, type IIA
TRCN0000000557	TRPS0000004288	ATTATTGTGATTTCCCGTGGC	NM_001619.x-2246s1c1	3UTR	NM_001619	156	ADRBK1	adrenergic, beta, receptor kinase 1
TRCN0000000558	TRPS0000013167	AGCGATAAGTTCACACGGTTT	NM_001619.x-587s1c1	CDS	NM_001619	156	ADRBK1	adrenergic, beta, receptor kinase 1
TRCN0000000559	TRPS0000328916	GATCAAGAAGTACGAGAAGCT	NM_001619.x-349s1c1	CDS	NM_001619	156	ADRBK1	adrenergic, beta, receptor kinase 1
TRCN0000000560	TRPS0000106574	CTTCGATGAGGAGGACACAAA	NM_001619.x-1546s1c1	CDS	NM_001619	156	ADRBK1	adrenergic, beta, receptor kinase 1
TRCN0000000561	TRPS0000281009	GAGCGATAAGTTCACACGGTT	NM_001619.x-586s1c1	CDS	NM_001619	156	ADRBK1	adrenergic, beta, receptor kinase 1
TRCN0000000562	TRPS0000178880	CGGGCTAAAGTGACCATGAAT	NM_001626.x-633s1c1	CDS	NM_001626	208	AKT2	v-akt murine thymoma viral oncogene homolog 2
TRCN0000000563	TRPS0000133574	CCCTTAAACAACTTCTCCGTA	NM_001626.x-354s1c1	CDS	NM_001626	208	AKT2	v-akt murine thymoma viral oncogene homolog 2
TRCN0000000564	TRPS0000073909	CTTCGACTATCTCAAACTCCT	NM_001626.x-656s1c1	CDS	NM_001626	208	AKT2	v-akt murine thymoma viral oncogene homolog 2
TRCN0000000565	TRPS0000004903	ACGGGCTAAAGTGACCATGAA	NM_001626.x-632s1c1	CDS	NM_001626	208	AKT2	v-akt murine thymoma viral oncogene homolog 2
TRCN0000000566	TRPS0000170311	CCTTAAACAACTTCTCCGTAG	NM_001626.x-355s1c1	CDS	NM_001626	208	AKT2	v-akt murine thymoma viral oncogene homolog 2
TRCN0000000567	TRPS0000050139	CCAGCCAATCAATGTTCGTCT	NM_001654.x-2083s1c1	3UTR	NM_001654	369	ARAF	v-raf murine sarcoma 3611 viral oncogene homolog
TRCN0000000568	TRPS0000375930	GTAGAGGAGGTAGTGATGGAA	NM_001654.x-939s1c1	CDS	NM_001654	369	ARAF	v-raf murine sarcoma 3611 viral oncogene homolog
TRCN0000000569	TRPS0000374653	GTCTAACAACATCTTCCTACA	NM_001654.x-1495s1c1	CDS	NM_001654	369	ARAF	v-raf murine sarcoma 3611 viral oncogene homolog
TRCN0000000570	TRPS0000025535	TCTTGCTGTTTATGGGCTTCA	NM_001654.x-1299s1c1	CDS	NM_001654	369	ARAF	v-raf murine sarcoma 3611 viral oncogene homolog
TRCN0000000571	TRPS0000272733	GACTCATCAAGGGACGAAAGA	NM_001654.x-390s1c1	CDS	NM_001654	369	ARAF	v-raf murine sarcoma 3611 viral oncogene homolog
TRCN0000000572	TRPS0000183181	CTTTAGGTTCTTTGCTGCATT	NM_001699.x-4548s1c1	3UTR	NM_001699	558	AXL	AXL receptor tyrosine kinase
TRCN0000000573	TRPS0000283857	GCGGTCTGCATGAAGGAATTT	NM_001699.x-2187s1c1	CDS	NM_001699	558	AXL	AXL receptor tyrosine kinase
TRCN0000000574	TRPS0000047942	CGAAAGAAGGAGACCCGTTAT	NM_001699.x-1854s1c1	CDS	NM_001699	558	AXL	AXL receptor tyrosine kinase
TRCN0000000575	TRPS0000216922	CGAAATCCTCTATGTCAACAT	NM_001699.x-2882s1c1	CDS	NM_001699	558	AXL	AXL receptor tyrosine kinase
TRCN0000000576	TRPS0000314075	GCTGTGAAGACGATGAAGATT	NM_001699.x-2124s1c1	CDS	NM_001699	558	AXL	AXL receptor tyrosine kinase
TRCN0000000577	TRPS0000347302	GATACCTAATACCGATGAGTT	NM_001744.x-1726s1c1	3UTR	NM_001744	814	CAMK4	calcium/calmodulin-dependent protein kinase IV
TRCN0000000578	TRPS0000274889	GCCTCTCACATCCAAACATTA	NM_001744.x-384s1c1	CDS	NM_001744	814	CAMK4	calcium/calmodulin-dependent protein kinase IV
TRCN0000000579	TRPS0000002095	AGAAAGTTAAAGGTGCAGATA	NM_001744.x-1302s1c1	CDS	NM_001744	814	CAMK4	calcium/calmodulin-dependent protein kinase IV
TRCN0000000580	TRPS0000381027	GTCACAGGTAAAGCAGCCAAT	NM_001744.x-998s1c1	CDS	NM_001744	814	CAMK4	calcium/calmodulin-dependent protein kinase IV
TRCN0000000581	TRPS0000086161	CAACGAGGACATGAAAGCTAT	NM_001744.x-1195s1c1	CDS	NM_001744	814	CAMK4	calcium/calmodulin-dependent protein kinase IV
TRCN0000000582	TRPS0000367017	GCTGTACTTCGTCTTCTAATT	NM_001786.x-1131s1c1	3UTR	NM_001786	983	CDC2	cell division cycle 2, G1 to S and G2 to M
TRCN0000000583	TRPS0000261171	GTGGAATCTTTACAGGACTAT	NM_001786.x-820s1c1	CDS	NM_001786	983	CDC2	cell division cycle 2, G1 to S and G2 to M
TRCN0000000584	TRPS0000038629	TCCAGGTTATATCTCATCTTT	NM_001786.x-349s1c1	CDS	NM_001786	983	CDC2	cell division cycle 2, G1 to S and G2 to M
TRCN0000000585	TRPS0000021220	TGGCTTGGATTTGCTCTCGAA	NM_001786.x-906s1c1	CDS	NM_001786	983	CDC2	cell division cycle 2, G1 to S and G2 to M
TRCN0000000586	TRPS0000007880	AGGAACAATTAAACTGGCTGA	NM_001786.x-546s1c1	CDS	NM_001786	983	CDC2	cell division cycle 2, G1 to S and G2 to M
TRCN0000000587	TRPS0000316570	GCCCTCTGAACTTGCCTTAAA	NM_001798.x-1222s1c1	3UTR	NM_001798	1017	CDK2	cyclin-dependent kinase 2
TRCN0000000588	TRPS0000309102	GCCTGATTACAAGCCAAGTTT	NM_001798.x-932s1c1	CDS	NM_001798	1017	CDK2	cyclin-dependent kinase 2
TRCN0000000589	TRPS0000006158	ACGACCCTAACAAGCGGATTT	NM_001798.x-1039s1c1	CDS	NM_001798	1017	CDK2	cyclin-dependent kinase 2
TRCN0000000590	TRPS0000187922	CTATGCCTGATTACAAGCCAA	NM_001798.x-928s1c1	CDS	NM_001798	1017	CDK2	cyclin-dependent kinase 2
TRCN0000000591	TRPS0000182668	CTCCTGGGCTGCAAATATTAT	NM_001798.x-753s1c1	CDS	NM_001798	1017	CDK2	cyclin-dependent kinase 2
TRCN0000000592	TRPS0000370367	GCTGTAGAAGTGAGTTTGTAA	NM_001799.x-1212s1c1	3UTR	NM_001799	1022	CDK7	cyclin-dependent kinase 7
TRCN0000000593	TRPS0000322200	GCAGGAGACGACTTACTAGAT	NM_001799.x-878s1c1	CDS	NM_001799	1022	CDK7	cyclin-dependent kinase 7
TRCN0000000594	TRPS0000033086	TCAGAAGCTAAAGATGGTATA	NM_001799.x-233s1c1	CDS	NM_001799	1022	CDK7	cyclin-dependent kinase 7
TRCN0000000595	TRPS0000251732	GTGGGCTGTTGGCTGTATATT	NM_001799.x-676s1c1	CDS	NM_001799	1022	CDK7	cyclin-dependent kinase 7
TRCN0000000596	TRPS0000058020	CATTTAAGAGTTTCCCTGGAA	NM_001799.x-831s1c1	CDS	NM_001799	1022	CDK7	cyclin-dependent kinase 7
TRCN0000000597	TRPS0000059090	CCCATCGAAGTGTTGTGTAAA	NM_001893.x-1022s1c1	CDS	NM_001893	1453	CSNK1D	casein kinase 1, delta
TRCN0000000598	TRPS0000166349	CGAAAGGATTAGCGAGAAGAA	NM_001893.x-991s1c1	CDS	NM_001893	1453	CSNK1D	casein kinase 1, delta
TRCN0000000599	TRPS0000044365	CCAAGAGACAGAAATACGAAA	NM_001893.x-975s1c1	CDS	NM_001893	1453	CSNK1D	casein kinase 1, delta
TRCN0000000600	TRPS0000118606	CGAAGTGTTGTGTAAAGGCTA	NM_001893.x-1027s1c1	CDS	NM_001893	1453	CSNK1D	casein kinase 1, delta
TRCN0000000601	TRPS0000112581	CGAATTTGCCACATACCTGAA	NM_001893.x-1054s1c1	CDS	NM_001893	1453	CSNK1D	casein kinase 1, delta
TRCN0000000602	TRPS0000117415	CCAGTGTTTGCTTAGTGTCTT	NM_001894.x-1380s1c1	3UTR	NM_001894	1454	CSNK1E	casein kinase 1, epsilon
TRCN0000000603	TRPS0000063622	CTCTTACCTACGTCAGCTCTT	NM_001894.x-909s1c1	CDS	NM_001894	1454	CSNK1E	casein kinase 1, epsilon
TRCN0000000604	TRPS0000024563	TCAGCGAGAAGAAGATGTCAA	NM_001894.x-794s1c1	CDS	NM_001894	1454	CSNK1E	casein kinase 1, epsilon
TRCN0000000605	TRPS0000199653	CATTTGACCATCTCGGGAAGT	NM_001894.x-1340s1c1	CDS	NM_001894	1454	CSNK1E	casein kinase 1, epsilon
TRCN0000000606	TRPS0000303971	GCTGCATTTAGGTGGAGACTT	NM_001895.x-1789s1c1	3UTR	NM_001895	1457	CSNK2A1	casein kinase 2, alpha 1 polypeptide
TRCN0000000607	TRPS0000196084	CGTAAACAACACAGACTTCAA	NM_001895.x-621s1c1	CDS	NM_001895	1457	CSNK2A1	casein kinase 2, alpha 1 polypeptide
TRCN0000000608	TRPS0000069848	CAAGAATATAATGTCCGAGTT	NM_001895.x-832s1c1	CDS	NM_001895	1457	CSNK2A1	casein kinase 2, alpha 1 polypeptide
TRCN0000000609	TRPS0000007413	AGAATTTGAGAGGAGGTCCCA	NM_001895.x-533s1c1	CDS	NM_001895	1457	CSNK2A1	casein kinase 2, alpha 1 polypeptide
TRCN0000000610	TRPS0000097019	CCAAGAATATAATGTCCGAGT	NM_001895.x-831s1c1	CDS	NM_001895	1457	CSNK2A1	casein kinase 2, alpha 1 polypeptide
TRCN0000000611	TRPS0000320893	GCGGCAGTTACATATTATTAT	NM_001896.x-1619s1c1	3UTR	NM_001896	1459	CSNK2A2	casein kinase 2, alpha prime polypeptide
TRCN0000000612	TRPS0000139734	CCTCGTGGACTATCAGATGTA	NM_001896.x-772s1c1	CDS	NM_001896	1459	CSNK2A2	casein kinase 2, alpha prime polypeptide
TRCN0000000613	TRPS0000100568	CGTGGTGGAACAAATATCATT	NM_001896.x-431s1c1	CDS	NM_001896	1459	CSNK2A2	casein kinase 2, alpha prime polypeptide
TRCN0000000614	TRPS0000103362	CTGGGACAACATTCACGGAAA	NM_001896.x-983s1c1	CDS	NM_001896	1459	CSNK2A2	casein kinase 2, alpha prime polypeptide
TRCN0000000615	TRPS0000003750	AGACCTAGATCCACACTTCAA	NM_001896.x-955s1c1	CDS	NM_001896	1459	CSNK2A2	casein kinase 2, alpha prime polypeptide
TRCN0000000616	TRPS0000343090	GCAGGTAATAATAAAGGTTGA	NM_001954.x-3795s1c1	3UTR	NM_001954	780	DDR1	discoidin domain receptor tyrosine kinase 1
TRCN0000000617	TRPS0000322575	GTATTTATCTGAGGCCGTGTA	NM_001954.x-942s1c1	CDS	NM_001954	780	DDR1	discoidin domain receptor tyrosine kinase 1
TRCN0000000618	TRPS0000046217	CTGGTAGCTGTCAAGATCTTA	NM_001954.x-2173s1c1	CDS	NM_001954	780	DDR1	discoidin domain receptor tyrosine kinase 1
TRCN0000000619	TRPS0000288346	GCTCTTATGTGTGCCTTTGTT	NM_001982.x-4570s1c1	3UTR	NM_001982	2065	ERBB3	v-erb-b2 erythroblastic leukemia viral oncogene homolog 3 (avian)
TRCN0000000620	TRPS0000114659	CCCAGTGAGAAGGCTAACAAA	NM_001982.x-2272s1c1	CDS	NM_001982	2065	ERBB3	v-erb-b2 erythroblastic leukemia viral oncogene homolog 3 (avian)
TRCN0000000621	TRPS0000116172	CCTGACAAGATGGAAGTAGAT	NM_001982.x-1117s1c1	CDS	NM_001982	2065	ERBB3	v-erb-b2 erythroblastic leukemia viral oncogene homolog 3 (avian)
TRCN0000000622	TRPS0000234967	CGACTAGACATCAAGCATAAT	NM_001982.x-1639s1c1	CDS	NM_001982	2065	ERBB3	v-erb-b2 erythroblastic leukemia viral oncogene homolog 3 (avian)
TRCN0000000623	TRPS0000123879	CTGCCTTTGATAACCCTGATT	NM_001982.x-4160s1c1	CDS	NM_001982	2065	ERBB3	v-erb-b2 erythroblastic leukemia viral oncogene homolog 3 (avian)
TRCN0000000624	TRPS0000204867	CAAGGCCAAGTTTCTACAGGA	NM_002005.x-1875s1c1	CDS	NM_002005	2242	FES	feline sarcoma oncogene
TRCN0000000625	TRPS0000149150	CATTCCTTTGCTCATCGACCA	NM_002005.x-1641s1c1	CDS	NM_002005	2242	FES	feline sarcoma oncogene
TRCN0000000626	TRPS0000151926	CTTGGATAACCTGTACCGACT	NM_002005.x-1599s1c1	CDS	NM_002005	2242	FES	feline sarcoma oncogene
TRCN0000000627	TRPS0000310060	GAGAAGAATGTCCTGAAGATC	NM_002005.x-2152s1c1	CDS	NM_002005	2242	FES	feline sarcoma oncogene
TRCN0000000628	TRPS0000256384	GCCGACACAAGAACATCATCA	NM_002011.x-1739s1c1	CDS	NM_002011	2264	FGFR4	fibroblast growth factor receptor 4
TRCN0000000629	TRPS0000068846	CCTATGTGCAAGTCCTAAAGA	NM_002011.x-1055s1c1	CDS	NM_002011	2264	FGFR4	fibroblast growth factor receptor 4
TRCN0000000630	TRPS0000009895	AGACATCAATAGCTCAGAGGT	NM_002011.x-1080s1c1	CDS	NM_002011	2264	FGFR4	fibroblast growth factor receptor 4
TRCN0000000631	TRPS0000209758	CCCGTCTCTATACCAACCAAA	NM_002019.x-5356s1c1	3UTR	NM_002019	2321	FLT1	fms-related tyrosine kinase 1 (vascular endothelial growth factor/vascular permeability factor receptor)
TRCN0000000632	TRPS0000097018	CCCGAATCTATCTTTGACAAA	NM_002019.x-3451s1c1	CDS	NM_002019	2321	FLT1	fms-related tyrosine kinase 1 (vascular endothelial growth factor/vascular permeability factor receptor)
TRCN0000000633	TRPS0000051545	CGCCGGAAGTTGTATGGTTAA	NM_002019.x-1340s1c1	CDS	NM_002019	2321	FLT1	fms-related tyrosine kinase 1 (vascular endothelial growth factor/vascular permeability factor receptor)
TRCN0000000634	TRPS0000262818	GAGAGACTTAAACTGGGCAAA	NM_002019.x-2722s1c1	CDS	NM_002019	2321	FLT1	fms-related tyrosine kinase 1 (vascular endothelial growth factor/vascular permeability factor receptor)
TRCN0000000635	TRPS0000114600	CTTGACACTTTGATCCCTGAT	NM_002019.x-769s1c1	CDS	NM_002019	2321	FLT1	fms-related tyrosine kinase 1 (vascular endothelial growth factor/vascular permeability factor receptor)
TRCN0000000636	TRPS0000247220	GAGAGACTTTGAGCAGCCATT	NM_002020.x-417s1c1	CDS	NM_002020	2324	FLT4	fms-related tyrosine kinase 4
TRCN0000000637	TRPS0000375975	GATCGTGGAGTTCTGCAAGTA	NM_002020.x-2796s1c1	CDS	NM_002020	2324	FLT4	fms-related tyrosine kinase 4
TRCN0000000638	TRPS0000001188	AGCAGATAGAGAGCAGGCATA	NM_002020.x-3875s1c1	CDS	NM_002020	2324	FLT4	fms-related tyrosine kinase 4
TRCN0000000639	TRPS0000025097	TCACCATCGAATCCAAGCCAT	NM_002020.x-1694s1c1	CDS	NM_002020	2324	FLT4	fms-related tyrosine kinase 4
TRCN0000000640	TRPS0000023305	TGCGAATACCTGTCCTACGAT	NM_002020.x-2503s1c1	CDS	NM_002020	2324	FLT4	fms-related tyrosine kinase 4
TRCN0000000641	TRPS0000284096	GCAGGGTTTGTCATTAATAAT	NM_003576.x-2107s1c1	3UTR	NM_003576	8428	STK24	serine/threonine kinase 24 (STE20 homolog, yeast)
TRCN0000000642	TRPS0000010551	ACAGAGACATTAAAGCGGCCA	NM_003576.x-606s1c1	CDS	NM_003576	8428	STK24	serine/threonine kinase 24 (STE20 homolog, yeast)
TRCN0000000643	TRPS0000285905	GACAGGTACAAGAGATGGAAG	NM_003576.x-1046s1c1	CDS	NM_003576	8428	STK24	serine/threonine kinase 24 (STE20 homolog, yeast)
TRCN0000000644	TRPS0000026960	TGGACAGAAATAAGATGAAAG	NM_003576.x-1221s1c1	CDS	NM_003576	8428	STK24	serine/threonine kinase 24 (STE20 homolog, yeast)
TRCN0000000645	TRPS0000037424	TGCAGAGTTGAAGGAGAAGAG	NM_003576.x-1297s1c1	CDS	NM_003576	8428	STK24	serine/threonine kinase 24 (STE20 homolog, yeast)
TRCN0000000646	TRPS0000009299	ATGATCTTACAAACCTGCAAA	NM_003582.x-1956s1c1	3UTR	NM_003582	8444	DYRK3	dual-specificity tyrosine-(Y)-phosphorylation regulated kinase 3
TRCN0000000647	TRPS0000295386	GCCAGGGTCTATGATCACAAA	NM_003582.x-817s1c1	CDS	NM_003582	8444	DYRK3	dual-specificity tyrosine-(Y)-phosphorylation regulated kinase 3
TRCN0000000648	TRPS0000034644	TGTTCAAATGTACTCTGCAAT	NM_003582.x-283s1c1	CDS	NM_003582	8444	DYRK3	dual-specificity tyrosine-(Y)-phosphorylation regulated kinase 3
TRCN0000000649	TRPS0000301428	GTAGGTCCAAATGCCAAGAAA	NM_003582.x-658s1c1	CDS	NM_003582	8444	DYRK3	dual-specificity tyrosine-(Y)-phosphorylation regulated kinase 3
TRCN0000000650	TRPS0000080757	CCTGGGAAACTATCAACTCTT	NM_003583.x-2863s1c1	3UTR	NM_003583	8445	DYRK2	dual-specificity tyrosine-(Y)-phosphorylation regulated kinase 2
TRCN0000000651	TRPS0000272116	GCAGGGTAGAAGCGGTATTAA	NM_003583.x-1085s1c1	CDS	NM_003583	8445	DYRK2	dual-specificity tyrosine-(Y)-phosphorylation regulated kinase 2
TRCN0000000652	TRPS0000332086	GAGGACTAATTTGGCGCAGAT	NM_003583.x-1739s1c1	CDS	NM_003583	8445	DYRK2	dual-specificity tyrosine-(Y)-phosphorylation regulated kinase 2
TRCN0000000653	TRPS0000284996	GCAGGACAAGGATAACACAAT	NM_003583.x-836s1c1	CDS	NM_003583	8445	DYRK2	dual-specificity tyrosine-(Y)-phosphorylation regulated kinase 2
TRCN0000000654	TRPS0000213974	CTGAACAAGCAATGAAGCAAT	NM_003583.x-478s1c1	CDS	NM_003583	8445	DYRK2	dual-specificity tyrosine-(Y)-phosphorylation regulated kinase 2
TRCN0000000655	TRPS0000009891	ACGAGAATTGTGCTACTTATA	NM_003600.x-1676s1c1	3UTR	NM_003600	6790	AURKA	aurora kinase A
TRCN0000000656	TRPS0000146948	CCTGTCTTACTGTCATTCGAA	NM_003600.x-985s1c1	CDS	NM_003600	6790	AURKA	aurora kinase A
TRCN0000000657	TRPS0000347533	GAGTCTACCTAATTCTGGAAT	NM_003600.x-870s1c1	CDS	NM_003600	6790	AURKA	aurora kinase A
TRCN0000000658	TRPS0000012877	AGGCCACTGAATAACACCCAA	NM_003600.x-524s1c1	CDS	NM_003600	6790	AURKA	aurora kinase A
TRCN0000000659	TRPS0000186378	CCGCAGATAAATGTAGAAATA	NM_003607.x-7066s1c1	3UTR	NM_003607	8476	CDC42BPA	CDC42 binding protein kinase alpha (DMPK-like)
TRCN0000000660	TRPS0000322378	GCGATTACATAGAGAAGACTT	NM_003607.x-1153s1c1	CDS	NM_003607	8476	CDC42BPA	CDC42 binding protein kinase alpha (DMPK-like)
TRCN0000000661	TRPS0000212879	CGCTCAGTCTATGTTCCCAAA	NM_003607.x-4535s1c1	CDS	NM_003607	8476	CDC42BPA	CDC42 binding protein kinase alpha (DMPK-like)
TRCN0000000662	TRPS0000245878	GCAAGAGATAACCAAACTAAA	NM_003607.x-2992s1c1	CDS	NM_003607	8476	CDC42BPA	CDC42 binding protein kinase alpha (DMPK-like)
TRCN0000000663	TRPS0000366762	GCTCAGTCAGTATTCCATCTA	NM_003607.x-5733s1c1	CDS	NM_003607	8476	CDC42BPA	CDC42 binding protein kinase alpha (DMPK-like)
TRCN0000000664	TRPS0000083325	CTGAAGACATACACTAAGAAT	NM_003618.x-3038s1c1	3UTR	NM_003618	8491	MAP4K3	mitogen-activated protein kinase kinase kinase kinase 3
TRCN0000000665	TRPS0000260678	GTGCCGAAGAAGGGATTTATA	NM_003618.x-1824s1c1	CDS	NM_003618	8491	MAP4K3	mitogen-activated protein kinase kinase kinase kinase 3
TRCN0000000666	TRPS0000379078	GTCCACTTAGAATGTTTGAAA	NM_003618.x-2250s1c1	CDS	NM_003618	8491	MAP4K3	mitogen-activated protein kinase kinase kinase kinase 3
TRCN0000000667	TRPS0000202062	CCAGATCATTCCACTTACCAT	NM_003618.x-965s1c1	CDS	NM_003618	8491	MAP4K3	mitogen-activated protein kinase kinase kinase kinase 3
TRCN0000000668	TRPS0000022710	TCGCACAGGATGAGATTTATA	NM_003646.x-2313s1c1	CDS	NM_003646	8525	DGKZ	diacylglycerol kinase, zeta 104kDa
TRCN0000000669	TRPS0000033056	TGTGATGGAATGGACTTGACT	NM_003646.x-1610s1c1	CDS	NM_003646	8525	DGKZ	diacylglycerol kinase, zeta 104kDa
TRCN0000000670	TRPS0000015927	ACAGGAAAGCCATCACCAAGT	NM_003646.x-246s1c1	CDS	NM_003646	8525	DGKZ	diacylglycerol kinase, zeta 104kDa
TRCN0000000671	TRPS0000139357	CCAGTCTTGTTGATTGTAATT	NM_003648.x-4146s1c1	3UTR	NM_003648	8527	DGKD	diacylglycerol kinase, delta 130kDa
TRCN0000000672	TRPS0000258882	GACAGCCTCAACCTTCATAAA	NM_003648.x-1118s1c1	CDS	NM_003648	8527	DGKD	diacylglycerol kinase, delta 130kDa
TRCN0000000673	TRPS0000008240	AGATCATAGAACACACAGAAA	NM_003648.x-1812s1c1	CDS	NM_003648	8527	DGKD	diacylglycerol kinase, delta 130kDa
TRCN0000000674	TRPS0000188645	CGCCTCGTGACCAAGTTTAAA	NM_003648.x-3299s1c1	CDS	NM_003648	8527	DGKD	diacylglycerol kinase, delta 130kDa
TRCN0000000675	TRPS0000243021	GAAGATTGGATTGCAGCATTA	NM_003648.x-350s1c1	CDS	NM_003648	8527	DGKD	diacylglycerol kinase, delta 130kDa
TRCN0000000676	TRPS0000122685	CTACCACTCCTCACTGCATTT	NM_003656.x-1405s1c1	3UTR	NM_003656	8536	CAMK1	calcium/calmodulin-dependent protein kinase I
TRCN0000000677	TRPS0000173923	CGGAGGACATTAGAGACATCT	NM_003656.x-216s1c1	CDS	NM_003656	8536	CAMK1	calcium/calmodulin-dependent protein kinase I
TRCN0000000678	TRPS0000316422	GCTCTTTGACCGTATTGTGGA	NM_003656.x-484s1c1	CDS	NM_003656	8536	CAMK1	calcium/calmodulin-dependent protein kinase I
TRCN0000000679	TRPS0000337296	GCTGGATGCTGTGAAATACCT	NM_003656.x-553s1c1	CDS	NM_003656	8536	CAMK1	calcium/calmodulin-dependent protein kinase I
TRCN0000000680	TRPS0000377502	GCTGTATAGATTTAGGGTGCA	NM_003668.x-1788s1c1	3UTR	NM_003668	8550	MAPKAPK5	mitogen-activated protein kinase-activated protein kinase 5
TRCN0000000681	TRPS0000308383	GCGGCACTGTCACTTGTTAAA	NM_003668.x-667s1c1	CDS	NM_003668	8550	MAPKAPK5	mitogen-activated protein kinase-activated protein kinase 5
TRCN0000000682	TRPS0000320254	GAAATTGTGAAGCAGGTGATA	NM_003668.x-1622s1c1	CDS	NM_003668	8550	MAPKAPK5	mitogen-activated protein kinase-activated protein kinase 5
TRCN0000000683	TRPS0000363362	GACGCCCTACACTTACAACAA	NM_003668.x-898s1c1	CDS	NM_003668	8550	MAPKAPK5	mitogen-activated protein kinase-activated protein kinase 5
TRCN0000000684	TRPS0000389626	GAAGGCATCAGAAGGAGAAAT	NM_003668.x-855s1c1	CDS	NM_003668	8550	MAPKAPK5	mitogen-activated protein kinase-activated protein kinase 5
TRCN0000000685	TRPS0000077644	CTGTCTTTGAGTTGTGGTGGA	NM_003674.x-1571s1c1	3UTR	NM_003674	8558	CDK10	cyclin-dependent kinase 10
TRCN0000000686	TRPS0000049504	CCTGTTCATGTACGACCCTAA	NM_003674.x-1055s1c1	CDS	NM_003674	8558	CDK10	cyclin-dependent kinase 10
TRCN0000000687	TRPS0000341783	GCTGCACTTCCTGTTCATGTA	NM_003674.x-1046s1c1	CDS	NM_003674	8558	CDK10	cyclin-dependent kinase 10
TRCN0000000688	TRPS0000000524	AGATGAGATTGTCGCACTGAA	NM_003674.x-332s1c1	CDS	NM_003674	8558	CDK10	cyclin-dependent kinase 10
TRCN0000000689	TRPS0000130147	CTACAACAACCTGAAGCACAA	NM_003674.x-992s1c1	CDS	NM_003674	8558	CDK10	cyclin-dependent kinase 10
TRCN0000000690	TRPS0000007184	ATCTGAGCATAACTGGGAGCA	NM_003688.x-2808s1c1	3UTR	NM_003688	8573	CASK	calcium/calmodulin-dependent serine protein kinase (MAGUK family)
TRCN0000000691	TRPS0000126818	CCCTGTAAAGAAGCTGGCATT	NM_003688.x-1921s1c1	CDS	NM_003688	8573	CASK	calcium/calmodulin-dependent serine protein kinase (MAGUK family)
TRCN0000000692	TRPS0000173089	CCCTGAGAATAACGACGCAAA	NM_003688.x-1284s1c1	CDS	NM_003688	8573	CASK	calcium/calmodulin-dependent serine protein kinase (MAGUK family)
TRCN0000000693	TRPS0000323724	GCCATCAACTACCCAACCAAA	NM_003688.x-1839s1c1	CDS	NM_003688	8573	CASK	calcium/calmodulin-dependent serine protein kinase (MAGUK family)
TRCN0000000694	TRPS0000291864	GCAAAGGAACTAAAGCGTATT	NM_003688.x-1300s1c1	CDS	NM_003688	8573	CASK	calcium/calmodulin-dependent serine protein kinase (MAGUK family)
TRCN0000000695	TRPS0000294209	GAGCAGGAGAATGTGTAACAA	NM_003691.x-1331s1c1	3UTR	NM_003691	8576	STK16	serine/threonine kinase 16
TRCN0000000696	TRPS0000384380	GCTGCTGCTACCATTCTTCAA	NM_003691.x-403s1c1	CDS	NM_003691	8576	STK16	serine/threonine kinase 16
TRCN0000000697	TRPS0000098835	CTGCGTGCTATATGCCATGAT	NM_003691.x-784s1c1	CDS	NM_003691	8576	STK16	serine/threonine kinase 16
TRCN0000000698	TRPS0000211432	CTAGTGGAAGGGTTACATGAT	NM_003691.x-224s1c1	CDS	NM_003691	8576	STK16	serine/threonine kinase 16
TRCN0000000699	TRPS0000012782	AGGTACGCTGTGGAATGAGAT	NM_003691.x-427s1c1	CDS	NM_003691	8576	STK16	serine/threonine kinase 16
TRCN0000000700	TRPS0000000964	AGTGTTATTGTGAAAGGTGTA	NM_003718.x-5160s1c1	3UTR	NM_003718	8621	CDC2L5	cell division cycle 2-like 5 (cholinesterase-related cell division controller)
TRCN0000000701	TRPS0000216526	CCTGAAGATAAAGAAGCTGAT	NM_003718.x-1981s1c1	CDS	NM_003718	8621	CDC2L5	cell division cycle 2-like 5 (cholinesterase-related cell division controller)
TRCN0000000702	TRPS0000328314	GCTGCGCTAGACTTATTTGAT	NM_003718.x-3040s1c1	CDS	NM_003718	8621	CDC2L5	cell division cycle 2-like 5 (cholinesterase-related cell division controller)
TRCN0000000703	TRPS0000353321	GCAATTCTACTAAACCTACTA	NM_003718.x-3409s1c1	CDS	NM_003718	8621	CDC2L5	cell division cycle 2-like 5 (cholinesterase-related cell division controller)
TRCN0000000704	TRPS0000234446	CGATGTCTTCTTGCTGATTTA	NM_003718.x-2059s1c1	CDS	NM_003718	8621	CDC2L5	cell division cycle 2-like 5 (cholinesterase-related cell division controller)
TRCN0000000705	TRPS0000017704	AGGTCATGTTCTTTCAGCTTA	NM_003804.x-2413s1c1	3UTR	NM_003804	8737	RIPK1	receptor (TNFRSF)-interacting serine-threonine kinase 1
TRCN0000000706	TRPS0000149600	CAGCACAAATACGAACTTCAA	NM_003804.x-1674s1c1	CDS	NM_003804	8737	RIPK1	receptor (TNFRSF)-interacting serine-threonine kinase 1
TRCN0000000707	TRPS0000162676	CAGGCCAATTCCAAGTCATAT	NM_003804.x-1470s1c1	CDS	NM_003804	8737	RIPK1	receptor (TNFRSF)-interacting serine-threonine kinase 1
TRCN0000000708	TRPS0000118423	CCTTGTTGATAATGACTTCCA	NM_003804.x-432s1c1	CDS	NM_003804	8737	RIPK1	receptor (TNFRSF)-interacting serine-threonine kinase 1
TRCN0000000709	TRPS0000120258	CTTACAACAGAGAGGAGGAAA	NM_003804.x-1211s1c1	CDS	NM_003804	8737	RIPK1	receptor (TNFRSF)-interacting serine-threonine kinase 1
TRCN0000000710	TRPS0000002453	ACCAGTGATTTGTATTAAGAC	NM_003845.x-1755s1c1	3UTR	NM_003845	8798	DYRK4	dual-specificity tyrosine-(Y)-phosphorylation regulated kinase 4
TRCN0000000711	TRPS0000269606	GACAAAGACAACACCTACAAT	NM_003845.x-635s1c1	CDS	NM_003845	8798	DYRK4	dual-specificity tyrosine-(Y)-phosphorylation regulated kinase 4
TRCN0000000712	TRPS0000353936	GTACATCCAAAGCCGGTTCTA	NM_003845.x-949s1c1	CDS	NM_003845	8798	DYRK4	dual-specificity tyrosine-(Y)-phosphorylation regulated kinase 4
TRCN0000000713	TRPS0000058726	CAAGCCTCTGTTAAAGTCATT	NM_003845.x-887s1c1	CDS	NM_003845	8798	DYRK4	dual-specificity tyrosine-(Y)-phosphorylation regulated kinase 4
TRCN0000000714	TRPS0000198226	CCATTCATTTAAGTGCTGTTT	NM_003909.x-4148s1c1	3UTR	NM_003909	8895	CPNE3	copine III
TRCN0000000715	TRPS0000100658	CCCTACTGCAATGGAATCCAA	NM_003909.x-1228s1c1	CDS	NM_003909	8895	CPNE3	copine III
TRCN0000000716	TRPS0000349862	GCACAGAAAGGATTAAGAATT	NM_003909.x-260s1c1	CDS	NM_003909	8895	CPNE3	copine III
TRCN0000000717	TRPS0000389728	GACCCTTTATGTGTGTTGTTT	NM_003909.x-202s1c1	CDS	NM_003909	8895	CPNE3	copine III
TRCN0000000718	TRPS0000166344	CCACGAAACAACAGAAGCAGT	NM_003909.x-1712s1c1	CDS	NM_003909	8895	CPNE3	copine III
TRCN0000000719	TRPS0000073006	CCCTATCAACTGTCTTATGTA	NM_003913.x-5387s1c1	3UTR	NM_003913	8899	PRPF4B	PRP4 pre-mRNA processing factor 4 homolog B (yeast)
TRCN0000000720	TRPS0000345140	GCTGCTGATGTTAAAGAGTAT	NM_003913.x-1829s1c1	CDS	NM_003913	8899	PRPF4B	PRP4 pre-mRNA processing factor 4 homolog B (yeast)
TRCN0000000721	TRPS0000061064	CTCAAGATCAAGCAAGGAAAT	NM_003913.x-759s1c1	CDS	NM_003913	8899	PRPF4B	PRP4 pre-mRNA processing factor 4 homolog B (yeast)
TRCN0000000722	TRPS0000373387	GAATGAAAGTTGAGCAGGAAT	NM_003913.x-1596s1c1	CDS	NM_003913	8899	PRPF4B	PRP4 pre-mRNA processing factor 4 homolog B (yeast)
TRCN0000000723	TRPS0000001207	AGCAAGTCAAAGGAGAGGAAA	NM_003913.x-707s1c1	CDS	NM_003913	8899	PRPF4B	PRP4 pre-mRNA processing factor 4 homolog B (yeast)
TRCN0000000724	TRPS0000332560	GAACTGGATGATGCTCTTGCA	NM_003948.x-1874s1c1	3UTR	NM_003948	8999	CDKL2	cyclin-dependent kinase-like 2 (CDC2-related kinase)
TRCN0000000725	TRPS0000223779	CAGTAGGACAAGCCACAACAA	NM_003948.x-1515s1c1	CDS	NM_003948	8999	CDKL2	cyclin-dependent kinase-like 2 (CDC2-related kinase)
TRCN0000000726	TRPS0000286116	GAGTTATGGAATGGTGATGAA	NM_003948.x-414s1c1	CDS	NM_003948	8999	CDKL2	cyclin-dependent kinase-like 2 (CDC2-related kinase)
TRCN0000000727	TRPS0000069321	CCATCAGGCATTTATAACATT	NM_003948.x-1756s1c1	CDS	NM_003948	8999	CDKL2	cyclin-dependent kinase-like 2 (CDC2-related kinase)
TRCN0000000728	TRPS0000025143	TGCGAGAAATCAAGTTACTAA	NM_003948.x-521s1c1	CDS	NM_003948	8999	CDKL2	cyclin-dependent kinase-like 2 (CDC2-related kinase)
TRCN0000000729	TRPS0000033437	TGCGTATGAAAGTGTGTGTCT	NM_003952.x-1618s1c1	3UTR	NM_003952	6199	RPS6KB2	ribosomal protein S6 kinase, 70kDa, polypeptide 2
TRCN0000000730	TRPS0000093103	CCTTTATTGTGGAACTGGCCT	NM_003952.x-440s1c1	CDS	NM_003952	6199	RPS6KB2	ribosomal protein S6 kinase, 70kDa, polypeptide 2
TRCN0000000731	TRPS0000106572	CCCAGAATTGTCCCTTTGTAT	NM_003954.x-1580s1c1	CDS	NM_003954	9020	MAP3K14	mitogen-activated protein kinase kinase kinase 14
TRCN0000000732	TRPS0000099513	CCTCGATCAGAACTCCACAAA	NM_003954.x-896s1c1	CDS	NM_003954	9020	MAP3K14	mitogen-activated protein kinase kinase kinase 14
TRCN0000000733	TRPS0000323722	GCTGTGTGTCTTCAACCTGAT	NM_003954.x-1844s1c1	CDS	NM_003954	9020	MAP3K14	mitogen-activated protein kinase kinase kinase 14
TRCN0000000734	TRPS0000376387	GTGTGAGAATAGCCAAGAGTT	NM_003954.x-487s1c1	CDS	NM_003954	9020	MAP3K14	mitogen-activated protein kinase kinase kinase 14
TRCN0000000735	TRPS0000195986	CAGTGTTATTTATTTGCCGTT	NM_003957.x-2938s1c1	3UTR	NM_003957	9024	BRSK2	BR serine/threonine kinase 2
TRCN0000000736	TRPS0000221476	CACTAACTGTATGGAAATGAT	NM_003957.x-2330s1c1	CDS	NM_003957	9024	BRSK2	BR serine/threonine kinase 2
TRCN0000000737	TRPS0000325177	GAACCAGGAGAAGATGATTTA	NM_003957.x-1367s1c1	CDS	NM_003957	9024	BRSK2	BR serine/threonine kinase 2
TRCN0000000738	TRPS0000280231	GCTCAACTCCATCAAGAACAG	NM_003957.x-1820s1c1	CDS	NM_003957	9024	BRSK2	BR serine/threonine kinase 2
TRCN0000000739	TRPS0000214646	CTGGACGAGAAGAACAACATC	NM_003957.x-831s1c1	CDS	NM_003957	9024	BRSK2	BR serine/threonine kinase 2
TRCN0000000740	TRPS0000363087	GCCCACTACATTCTCAAACAA	NM_003985.x-2368s1c1	3UTR	NM_003985	8711	TNK1	tyrosine kinase, non-receptor, 1
TRCN0000000741	TRPS0000188971	CAGGGCACTTCGACTTTGTAA	NM_003985.x-220s1c1	CDS	NM_003985	8711	TNK1	tyrosine kinase, non-receptor, 1
TRCN0000000742	TRPS0000073912	CCACCTTTATCCTCTAGCTCT	NM_003985.x-1734s1c1	CDS	NM_003985	8711	TNK1	tyrosine kinase, non-receptor, 1
TRCN0000000743	TRPS0000295091	GAAGCATGTTGTGTGAGGGAT	NM_003985.x-1266s1c1	CDS	NM_003985	8711	TNK1	tyrosine kinase, non-receptor, 1
TRCN0000000744	TRPS0000366388	GATCAACACCCAGGAAGCATA	NM_003985.x-1503s1c1	CDS	NM_003985	8711	TNK1	tyrosine kinase, non-receptor, 1
TRCN0000000745	TRPS0000352472	GCTAGAAATCAACGTGCTCAA	NM_003992.x-653s1c1	CDS	NM_003992	1198	CLK3	CDC-like kinase 3
TRCN0000000746	TRPS0000156325	CCGTACCAGGAAGCAGAAATA	NM_003992.x-1253s1c1	CDS	NM_003992	1198	CLK3	CDC-like kinase 3
TRCN0000000747	TRPS0000171402	CCTGTGTGTCTTGATGTCTGA	NM_003992.x-707s1c1	CDS	NM_003992	1198	CLK3	CDC-like kinase 3
TRCN0000000748	TRPS0000010416	ACTACTATGGACCTTCACGTT	NM_003992.x-301s1c1	CDS	NM_003992	1198	CLK3	CDC-like kinase 3
TRCN0000000749	TRPS0000197576	CATTGGCTGCATTCTCTTTGA	NM_003992.x-1133s1c1	CDS	NM_003992	1198	CLK3	CDC-like kinase 3
TRCN0000000750	TRPS0000057337	CTTCCTCCTGGCTCTCTATAT	NM_003993.x-1729s1c1	3UTR	NM_003993	1196	CLK2	CDC-like kinase 2
TRCN0000000751	TRPS0000381883	GAGATCAACGTGCTAGAGAAA	NM_003993.x-751s1c1	CDS	NM_003993	1196	CLK2	CDC-like kinase 2
TRCN0000000752	TRPS0000327373	GAAAGCATAAGCGACGAAGAA	NM_003993.x-203s1c1	CDS	NM_003993	1196	CLK2	CDC-like kinase 2
TRCN0000000753	TRPS0000256938	GAAGCAGTTATGATGATCGTT	NM_003993.x-296s1c1	CDS	NM_003993	1196	CLK2	CDC-like kinase 2
TRCN0000000754	TRPS0000029820	TGGTTCATTAAGTACATAGCT	NM_004071.x-1746s1c1	3UTR	NM_004071	1195	CLK1	CDC-like kinase 1
TRCN0000000755	TRPS0000290109	GCTGCAAATACAATCACTCTA	NM_004071.x-283s1c1	CDS	NM_004071	1195	CLK1	CDC-like kinase 1
TRCN0000000756	TRPS0000385778	GCTCGCTCAGAAATACAAGTT	NM_004071.x-762s1c1	CDS	NM_004071	1195	CLK1	CDC-like kinase 1
TRCN0000000757	TRPS0000294210	GATATGTTTCAAGAGCCTGTA	NM_004071.x-1435s1c1	CDS	NM_004071	1195	CLK1	CDC-like kinase 1
TRCN0000000758	TRPS0000283178	GATATGCAAGTCTGTGAATTT	NM_004071.x-968s1c1	CDS	NM_004071	1195	CLK1	CDC-like kinase 1
TRCN0000000759	TRPS0000313714	GGCGTTATTTATGGACCACTT	NM_004073.x-2072s1c1	3UTR	NM_004073	1263	PLK3	polo-like kinase 3 (Drosophila)
TRCN0000000760	TRPS0000309696	GACGCTGACAACATCTACATT	NM_004073.x-310s1c1	CDS	NM_004073	1263	PLK3	polo-like kinase 3 (Drosophila)
TRCN0000000761	TRPS0000155244	CAGCGCGAGAAGATCCTAAAT	NM_004073.x-226s1c1	CDS	NM_004073	1263	PLK3	polo-like kinase 3 (Drosophila)
TRCN0000000762	TRPS0000016249	AGTGTGGAAGAGGTAGAGGTA	NM_004073.x-1570s1c1	CDS	NM_004073	1263	PLK3	polo-like kinase 3 (Drosophila)
TRCN0000000763	TRPS0000247305	GAAGAGTAAGAATCATGCCCA	NM_004073.x-987s1c1	CDS	NM_004073	1263	PLK3	polo-like kinase 3 (Drosophila)
TRCN0000000764	TRPS0000050098	CCTGAACTGCATGATTTATTA	NM_004080.x-3870s1c1	3UTR	NM_004080	1607	DGKB	diacylglycerol kinase, beta 90kDa
TRCN0000000765	TRPS0000056979	CCTAATGACAAAGATGAGAAA	NM_004080.x-1702s1c1	CDS	NM_004080	1607	DGKB	diacylglycerol kinase, beta 90kDa
TRCN0000000766	TRPS0000236550	CCTGCAAGAAGCTACATGAAT	NM_004080.x-1895s1c1	CDS	NM_004080	1607	DGKB	diacylglycerol kinase, beta 90kDa
TRCN0000000767	TRPS0000187610	CCTTTATGACACGGATGGGAA	NM_004080.x-477s1c1	CDS	NM_004080	1607	DGKB	diacylglycerol kinase, beta 90kDa
TRCN0000000768	TRPS0000287480	GCAAATATACACAGGCCTGAA	NM_004080.x-2181s1c1	CDS	NM_004080	1607	DGKB	diacylglycerol kinase, beta 90kDa
TRCN0000000769	TRPS0000084664	CGTGAAGATGTGGTCCTGAAT	NM_004103.x-1912s1c1	CDS	NM_004103	2185	PTK2B	PTK2B protein tyrosine kinase 2 beta
TRCN0000000770	TRPS0000111439	CTTTGGTCTTTCCCGGTACAT	NM_004103.x-2349s1c1	CDS	NM_004103	2185	PTK2B	PTK2B protein tyrosine kinase 2 beta
TRCN0000000771	TRPS0000071293	CAAGGCTCTCTCATCATCCAT	NM_004103.x-1723s1c1	CDS	NM_004103	2185	PTK2B	PTK2B protein tyrosine kinase 2 beta
TRCN0000000772	TRPS0000079283	CGTCTGCGTTTACTCTTGTTT	NM_004119.x-3176s1c1	3UTR	NM_004119	2322	FLT3	fms-related tyrosine kinase 3
TRCN0000000773	TRPS0000350050	GCTAACTTCTACAAACTGATT	NM_004119.x-2743s1c1	CDS	NM_004119	2322	FLT3	fms-related tyrosine kinase 3
TRCN0000000774	TRPS0000127027	CCACTTTCCAATCACATCCAA	NM_004119.x-2237s1c1	CDS	NM_004119	2322	FLT3	fms-related tyrosine kinase 3
TRCN0000000775	TRPS0000051024	CTGGAATTTAAGTCGTGTGTT	NM_004119.x-2461s1c1	CDS	NM_004119	2322	FLT3	fms-related tyrosine kinase 3
TRCN0000000776	TRPS0000064299	CTACCTCCTCCTTTGTTTAAT	NM_004217.x-1185s1c1	3UTR	NM_004217	9212	AURKB	aurora kinase B
TRCN0000000777	TRPS0000204028	CCTGCGTCTCTACAACTATTT	NM_004217.x-468s1c1	CDS	NM_004217	9212	AURKB	aurora kinase B
TRCN0000000778	TRPS0000032375	TGATGGAGAATAGCAGTGGGA	NM_004217.x-227s1c1	CDS	NM_004217	9212	AURKB	aurora kinase B
TRCN0000000779	TRPS0000252088	GAAGAGCTGCACATTTGACGA	NM_004217.x-558s1c1	CDS	NM_004217	9212	AURKB	aurora kinase B
TRCN0000000780	TRPS0000065298	CCAGTGAGATTATGATTTGTA	NM_004226.x-1433s1c1	3UTR	NM_004226	9262	STK17B	serine/threonine kinase 17b
TRCN0000000781	TRPS0000324433	GATAGAGAAGACAAAGAGAAT	NM_004226.x-1269s1c1	CDS	NM_004226	9262	STK17B	serine/threonine kinase 17b
TRCN0000000782	TRPS0000012375	ACTTCTAAATCCTCCTGTAAT	NM_004226.x-1236s1c1	CDS	NM_004226	9262	STK17B	serine/threonine kinase 17b
TRCN0000000783	TRPS0000065161	CAGAGGATAGCAGCATGGTTT	NM_004226.x-1294s1c1	CDS	NM_004226	9262	STK17B	serine/threonine kinase 17b
TRCN0000000784	TRPS0000390661	GTGATAAATACAAGGCCCAGA	NM_004304.x-5992s1c1	3UTR	NM_004304	238	ALK	anaplastic lymphoma receptor tyrosine kinase
TRCN0000000785	TRPS0000383129	GAGCTGGTCATTACGAGGATA	NM_004304.x-5706s1c1	CDS	NM_004304	238	ALK	anaplastic lymphoma receptor tyrosine kinase
TRCN0000000786	TRPS0000005572	ACCCAAATCAAGAAACCTGTT	NM_004304.x-2854s1c1	CDS	NM_004304	238	ALK	anaplastic lymphoma receptor tyrosine kinase
TRCN0000000787	TRPS0000013796	AGAAGAAGAAATCCGTGTGAA	NM_004304.x-3310s1c1	CDS	NM_004304	238	ALK	anaplastic lymphoma receptor tyrosine kinase
TRCN0000000788	TRPS0000109107	CTGGTCATAGCTCCTTGGAAT	NM_004304.x-1572s1c1	CDS	NM_004304	238	ALK	anaplastic lymphoma receptor tyrosine kinase
TRCN0000000789	TRPS0000078803	CAAGAGTTACACGTTCCTGAT	NM_004327.x-3011s1c1	CDS	NM_004327	613	BCR	breakpoint cluster region
TRCN0000000790	TRPS0000177076	CTGACCAACTCGTGTGTGAAA	NM_004327.x-3132s1c1	CDS	NM_004327	613	BCR	breakpoint cluster region
TRCN0000000791	TRPS0000234088	CGAGGAATTTGAGATAGAGCT	NM_004327.x-3365s1c1	CDS	NM_004327	613	BCR	breakpoint cluster region
TRCN0000000792	TRPS0000324763	GTTCCTGATCTCCTCTGACTA	NM_004327.x-3023s1c1	CDS	NM_004327	613	BCR	breakpoint cluster region
TRCN0000000793	TRPS0000011273	AGAGCCAGAAGCAACAAAGAT	NM_004327.x-2355s1c1	CDS	NM_004327	613	BCR	breakpoint cluster region
TRCN0000000794	TRPS0000195247	CGCCAATCTCATACAAGCCAT	NM_004329.x-2565s1c1	3UTR	NM_004329	657	BMPR1A	bone morphogenetic protein receptor, type IA
TRCN0000000795	TRPS0000211031	CGTGATTTGGAACAGGATGAA	NM_004329.x-880s1c1	CDS	NM_004329	657	BMPR1A	bone morphogenetic protein receptor, type IA
TRCN0000000796	TRPS0000035275	TCTCTCTATGACTTCCTGAAA	NM_004329.x-1255s1c1	CDS	NM_004329	657	BMPR1A	bone morphogenetic protein receptor, type IA
TRCN0000000797	TRPS0000315026	GATGAATGTCTACGAGCAGTT	NM_004329.x-1777s1c1	CDS	NM_004329	657	BMPR1A	bone morphogenetic protein receptor, type IA
TRCN0000000798	TRPS0000314560	GTCCAGATGATGCTATTAATA	NM_004329.x-509s1c1	CDS	NM_004329	657	BMPR1A	bone morphogenetic protein receptor, type IA
TRCN0000000799	TRPS0000200517	CACTGTAAATATGAATCTGCT	NM_004336.x-3338s1c1	3UTR	NM_004336	699	BUB1	budding uninhibited by benzimidazoles 1 homolog (yeast)
TRCN0000000800	TRPS0000167452	CGAGGTTAATCCAGCACGTAT	NM_004336.x-1003s1c1	CDS	NM_004336	699	BUB1	budding uninhibited by benzimidazoles 1 homolog (yeast)
TRCN0000000801	TRPS0000000047	ACCAGTGAGTTCCTATCCAAA	NM_004336.x-2317s1c1	CDS	NM_004336	699	BUB1	budding uninhibited by benzimidazoles 1 homolog (yeast)
TRCN0000000802	TRPS0000003356	AGAAATACAATCAACGGAGAA	NM_004336.x-819s1c1	CDS	NM_004336	699	BUB1	budding uninhibited by benzimidazoles 1 homolog (yeast)
TRCN0000000803	TRPS0000012867	AGAAAGAAAGTACCCAGCAAA	NM_004383.x-2117s1c1	3UTR	NM_004383	1445	CSK	c-src tyrosine kinase
TRCN0000000804	TRPS0000211778	CGAGGAGGTGTACTTTGAGAA	NM_004383.x-835s1c1	CDS	NM_004383	1445	CSK	c-src tyrosine kinase
TRCN0000000805	TRPS0000024857	TGTCTCCTCAAGTTCTCGCTA	NM_004383.x-1280s1c1	CDS	NM_004383	1445	CSK	c-src tyrosine kinase
TRCN0000000806	TRPS0000264759	GAGAAGGGCTACAAGATGGAT	NM_004383.x-1610s1c1	CDS	NM_004383	1445	CSK	c-src tyrosine kinase
TRCN0000000807	TRPS0000034036	TGCATTAAGAACGACGCCACT	NM_004383.x-1079s1c1	CDS	NM_004383	1445	CSK	c-src tyrosine kinase
TRCN0000000808	TRPS0000160014	CACCGAAACTTACTGCTGAAT	NM_004384.x-2281s1c1	3UTR	NM_004384	1456	CSNK1G3	casein kinase 1, gamma 3
TRCN0000000809	TRPS0000108957	CCGGAGACAAAGAAACACATA	NM_004384.x-613s1c1	CDS	NM_004384	1456	CSNK1G3	casein kinase 1, gamma 3
TRCN0000000810	TRPS0000015413	AGGACGTTCAAATGCACCCAT	NM_004384.x-1260s1c1	CDS	NM_004384	1456	CSNK1G3	casein kinase 1, gamma 3
TRCN0000000811	TRPS0000001664	ACTTCTTAATAGGACGACCAA	NM_004384.x-530s1c1	CDS	NM_004384	1456	CSNK1G3	casein kinase 1, gamma 3
TRCN0000000812	TRPS0000351236	GCCTGCTTACTCGGGAAATTT	NM_004409.x-3120s1c1	3UTR	NM_004409	1760	DMPK	dystrophia myotonica-protein kinase
TRCN0000000813	TRPS0000024645	TCGAGACTTCATTCAGCGGTT	NM_004409.x-1706s1c1	CDS	NM_004409	1760	DMPK	dystrophia myotonica-protein kinase
TRCN0000000814	TRPS0000182721	CCTGGTCATGGAGTATTACGT	NM_004409.x-1211s1c1	CDS	NM_004409	1760	DMPK	dystrophia myotonica-protein kinase
TRCN0000000815	TRPS0000147859	CCCTTTACACCGGATTTCGAA	NM_004409.x-1833s1c1	CDS	NM_004409	1760	DMPK	dystrophia myotonica-protein kinase
TRCN0000000816	TRPS0000011705	AGCGGTAGTGAAGATGAAGCA	NM_004409.x-1031s1c1	CDS	NM_004409	1760	DMPK	dystrophia myotonica-protein kinase
TRCN0000000817	TRPS0000157458	CACTCGTTTCCCTTTGCTCAT	NM_004441.x-3623s1c1	3UTR	NM_004441	2047	EPHB1	EPH receptor B1
TRCN0000000818	TRPS0000377222	GCCTCTTACTCGGAATGGTTT	NM_004441.x-712s1c1	CDS	NM_004441	2047	EPHB1	EPH receptor B1
TRCN0000000819	TRPS0000379601	GCTGCGATGGAAGAAACGTTA	NM_004441.x-260s1c1	CDS	NM_004441	2047	EPHB1	EPH receptor B1
TRCN0000000820	TRPS0000347433	GACTATGAGATCCGGTACTAT	NM_004441.x-1610s1c1	CDS	NM_004441	2047	EPHB1	EPH receptor B1
TRCN0000000821	TRPS0000170414	CCTGGCTGAGATGAATTATGT	NM_004441.x-2416s1c1	CDS	NM_004441	2047	EPHB1	EPH receptor B1
TRCN0000000822	TRPS0000233172	CCCAAATGTCAAACTACCAAA	NM_002093.x-1306s1c1	CDS	NM_002093	2932	GSK3B	glycogen synthase kinase 3 beta
TRCN0000000823	TRPS0000083164	CCGATTGCGTTATTTCTTCTA	NM_002093.x-562s1c1	CDS	NM_002093	2932	GSK3B	glycogen synthase kinase 3 beta
TRCN0000000824	TRPS0000047329	CCAATGTTTCGTATATCTGTT	NM_002093.x-867s1c1	CDS	NM_002093	2932	GSK3B	glycogen synthase kinase 3 beta
TRCN0000000825	TRPS0000123942	CAGTTGAGCATCTAGGAAGTA	NM_002314.x-3140s1c1	3UTR	NM_002314	3984	LIMK1	LIM domain kinase 1
TRCN0000000826	TRPS0000304503	GACGAGATTGACCTGCTGATT	NM_002314.x-874s1c1	CDS	NM_002314	3984	LIMK1	LIM domain kinase 1
TRCN0000000827	TRPS0000062523	CCGTTTGATGATTCCTTAGAA	NM_002754.x-1065s1c1	CDS	NM_002754	5603	MAPK13	mitogen-activated protein kinase 13
TRCN0000000828	TRPS0000036373	TGAACGACAAAGCGGCCAAAT	NM_002754.x-847s1c1	CDS	NM_002754	5603	MAPK13	mitogen-activated protein kinase 13
TRCN0000000829	TRPS0000387245	GCAGCCGTTTGATGATTCCTT	NM_002754.x-1061s1c1	CDS	NM_002754	5603	MAPK13	mitogen-activated protein kinase 13
TRCN0000000830	TRPS0000357103	GCTCCCTAAACACTACCAAAT	NM_003242.x-2017s1c1	CDS	NM_003242	7048	TGFBR2	transforming growth factor, beta receptor II (70/80kDa)
TRCN0000000831	TRPS0000245898	GAAGAATATAACACCAGCAAT	NM_003242.x-786s1c1	CDS	NM_003242	7048	TGFBR2	transforming growth factor, beta receptor II (70/80kDa)
TRCN0000000832	TRPS0000029671	TGTGGCTGTATGGAGAAAGAA	NM_003242.x-587s1c1	CDS	NM_003242	7048	TGFBR2	transforming growth factor, beta receptor II (70/80kDa)
TRCN0000000833	TRPS0000334700	GTCGCTTTGCTGAGGTCTATA	NM_003242.x-1093s1c1	CDS	NM_003242	7048	TGFBR2	transforming growth factor, beta receptor II (70/80kDa)
TRCN0000000834	TRPS0000177653	CTTCTACTGCTACCGCGTTAA	NM_003242.x-890s1c1	CDS	NM_003242	7048	TGFBR2	transforming growth factor, beta receptor II (70/80kDa)
TRCN0000000835	TRPS0000298477	GCCCTTTGCGTTATATTGTAT	NM_003565.x-5154s1c1	3UTR	NM_003565	8408	ULK1	unc-51-like kinase 1 (C. elegans)
TRCN0000000836	TRPS0000114603	CAAGTGCATTAACAAGAAGAA	NM_003565.x-403s1c1	CDS	NM_003565	8408	ULK1	unc-51-like kinase 1 (C. elegans)
TRCN0000000837	TRPS0000194894	CCTGGTTATGGAGTACTGCAA	NM_003565.x-535s1c1	CDS	NM_003565	8408	ULK1	unc-51-like kinase 1 (C. elegans)
TRCN0000000838	TRPS0000004491	ACATCGAGAACGTCACCAAGT	NM_003565.x-3345s1c1	CDS	NM_003565	8408	ULK1	unc-51-like kinase 1 (C. elegans)
TRCN0000000839	TRPS0000026037	TACACGCCATCTCCTCAAGTT	NM_003565.x-1772s1c1	CDS	NM_003565	8408	ULK1	unc-51-like kinase 1 (C. elegans)
TRCN0000000840	TRPS0000071667	CGAAGGACCATAGACAGAGAT	NM_005308.x-356s1c1	CDS	NM_005308	2869	GRK5	G protein-coupled receptor kinase 5
TRCN0000000841	TRPS0000370103	GAAGGAAATTATGACCAAGTA	NM_005308.x-526s1c1	CDS	NM_005308	2869	GRK5	G protein-coupled receptor kinase 5
TRCN0000000842	TRPS0000009820	ACGAGATGATAGAAACAGAAT	NM_005308.x-1758s1c1	CDS	NM_005308	2869	GRK5	G protein-coupled receptor kinase 5
TRCN0000000843	TRPS0000219787	CCACCACATAAACTCAAACCA	NM_005308.x-1942s1c1	CDS	NM_005308	2869	GRK5	G protein-coupled receptor kinase 5
TRCN0000000844	TRPS0000359168	GCAGAACTCAAGGGCAAAGAT	NM_005400.x-1288s1c1	CDS	NM_005400	5581	PRKCE	protein kinase C, epsilon
TRCN0000000845	TRPS0000182072	CCCTTCAAACCACGCATTAAA	NM_005400.x-2065s1c1	CDS	NM_005400	5581	PRKCE	protein kinase C, epsilon
TRCN0000000846	TRPS0000106041	CCACAAGTTCGGTATCCACAA	NM_005400.x-741s1c1	CDS	NM_005400	5581	PRKCE	protein kinase C, epsilon
TRCN0000000847	TRPS0000036374	TGTCATAGGAAAGCAGGGATA	NM_005400.x-591s1c1	CDS	NM_005400	5581	PRKCE	protein kinase C, epsilon
TRCN0000000848	TRPS0000297101	GCCAGAAGGAAGAGTGTATGT	NM_005400.x-375s1c1	CDS	NM_005400	5581	PRKCE	protein kinase C, epsilon
TRCN0000000849	TRPS0000233138	CCGTGACATTAAAGGTGCCAA	NM_005922.x-4522s1c1	CDS	NM_005922	4216	MAP3K4	mitogen-activated protein kinase kinase kinase 4
TRCN0000000850	TRPS0000382360	GCTTCGCCTTTGTTAGAGATA	NM_005922.x-1062s1c1	CDS	NM_005922	4216	MAP3K4	mitogen-activated protein kinase kinase kinase 4
TRCN0000000851	TRPS0000270036	GCCCGGAAGTGGATGAATTAT	NM_005922.x-3350s1c1	CDS	NM_005922	4216	MAP3K4	mitogen-activated protein kinase kinase kinase 4
TRCN0000000852	TRPS0000227187	CAACCAAACATCAGAGGAATA	NM_005922.x-429s1c1	CDS	NM_005922	4216	MAP3K4	mitogen-activated protein kinase kinase kinase 4
TRCN0000000853	TRPS0000022793	TCACCCTTTGTACCAGATGTT	NM_006035.x-6389s1c1	3UTR	NM_006035	9578	CDC42BPB	CDC42 binding protein kinase beta (DMPK-like)
TRCN0000000854	TRPS0000307290	GCAGTCCAACACATTAACCAA	NM_006035.x-1546s1c1	CDS	NM_006035	9578	CDC42BPB	CDC42 binding protein kinase beta (DMPK-like)
TRCN0000000855	TRPS0000118183	CAGCAATTCAAACCGAGATAA	NM_006035.x-1723s1c1	CDS	NM_006035	9578	CDC42BPB	CDC42 binding protein kinase beta (DMPK-like)
TRCN0000000856	TRPS0000191805	CCACCAAACACTCAACTCCAT	NM_006035.x-5307s1c1	CDS	NM_006035	9578	CDC42BPB	CDC42 binding protein kinase beta (DMPK-like)
TRCN0000000857	TRPS0000328131	GCATAATAAGTCACAGCCAAA	NM_006251.x-1716s1c1	3UTR	NM_006251	5562	PRKAA1	protein kinase, AMP-activated, alpha 1 catalytic subunit
TRCN0000000858	TRPS0000082267	CCATCCTGAAAGAGTACCATT	NM_006251.x-1106s1c1	CDS	NM_006251	5562	PRKAA1	protein kinase, AMP-activated, alpha 1 catalytic subunit
TRCN0000000859	TRPS0000167357	CCTGGAAGTCACACAATAGAA	NM_006251.x-1611s1c1	CDS	NM_006251	5562	PRKAA1	protein kinase, AMP-activated, alpha 1 catalytic subunit
TRCN0000000860	TRPS0000024576	TGATTGATGATGAAGCCTTAA	NM_006251.x-889s1c1	CDS	NM_006251	5562	PRKAA1	protein kinase, AMP-activated, alpha 1 catalytic subunit
TRCN0000000861	TRPS0000363449	GTTGCCTACCATCTCATAATA	NM_006251.x-993s1c1	CDS	NM_006251	5562	PRKAA1	protein kinase, AMP-activated, alpha 1 catalytic subunit
TRCN0000000862	TRPS0000305016	GCTTCTGGTCTTGATGTATTT	NM_006343.x-3535s1c1	3UTR	NM_006343	10461	MERTK	c-mer proto-oncogene tyrosine kinase
TRCN0000000863	TRPS0000277541	GCTCAATCAATGTACCTAATA	NM_006343.x-481s1c1	CDS	NM_006343	10461	MERTK	c-mer proto-oncogene tyrosine kinase
TRCN0000000864	TRPS0000113831	CGAGCCATTGAACTTACCTTA	NM_006343.x-1809s1c1	CDS	NM_006343	10461	MERTK	c-mer proto-oncogene tyrosine kinase
TRCN0000000865	TRPS0000225038	CCTGCATACTTACTTACTTTA	NM_006343.x-2171s1c1	CDS	NM_006343	10461	MERTK	c-mer proto-oncogene tyrosine kinase
TRCN0000000866	TRPS0000351041	GAAGATTTACAGTGGCGATTA	NM_006343.x-2375s1c1	CDS	NM_006343	10461	MERTK	c-mer proto-oncogene tyrosine kinase
TRCN0000000867	TRPS0000352839	GCCCTGAACATGCTCTTACAA	NM_006622.x-2326s1c1	CDS	NM_006622	10769	PLK2	polo-like kinase 2 (Drosophila)
TRCN0000000868	TRPS0000388005	GTAGAAGGTCAATGGCTCATA	NM_006622.x-788s1c1	CDS	NM_006622	10769	PLK2	polo-like kinase 2 (Drosophila)
TRCN0000000869	TRPS0000319373	GTGACGGTGCTGAAATACTTT	NM_006622.x-2005s1c1	CDS	NM_006622	10769	PLK2	polo-like kinase 2 (Drosophila)
TRCN0000000870	TRPS0000293660	GAACACAGAAGGAGAACGATA	NM_006622.x-1000s1c1	CDS	NM_006622	10769	PLK2	polo-like kinase 2 (Drosophila)
TRCN0000000871	TRPS0000120283	CAAGCAAACATAACTGATCAG	NM_007118.x-8724s1c1	3UTR	NM_007118	7204	TRIO	triple functional domain (PTPRF interacting)
TRCN0000000872	TRPS0000384961	GCACAGAACACATACACCAAT	NM_007118.x-1738s1c1	CDS	NM_007118	7204	TRIO	triple functional domain (PTPRF interacting)
TRCN0000000873	TRPS0000324924	GCAACGTGGATTCATGGTGTA	NM_007118.x-1265s1c1	CDS	NM_007118	7204	TRIO	triple functional domain (PTPRF interacting)
TRCN0000000874	TRPS0000311444	GCTTCTCAATCCCAACTACAT	NM_007118.x-7377s1c1	CDS	NM_007118	7204	TRIO	triple functional domain (PTPRF interacting)
TRCN0000000875	TRPS0000030211	TGGGTGATGCAGATAAACAAT	NM_007199.x-1971s1c1	3UTR	NM_007199	11213	IRAK3	interleukin-1 receptor-associated kinase 3
TRCN0000000876	TRPS0000291866	GCAGTGTAAGAAGCATTGGAA	NM_007199.x-663s1c1	CDS	NM_007199	11213	IRAK3	interleukin-1 receptor-associated kinase 3
TRCN0000000877	TRPS0000373167	GAAGATGATGAAAGCCAGAAT	NM_007199.x-1501s1c1	CDS	NM_007199	11213	IRAK3	interleukin-1 receptor-associated kinase 3
TRCN0000000878	TRPS0000214925	CGGGCAAAGTTAAGACCATCA	NM_007199.x-1348s1c1	CDS	NM_007199	11213	IRAK3	interleukin-1 receptor-associated kinase 3
TRCN0000000879	TRPS0000184180	CATCAGAGTTGTACCATAAAT	NM_007199.x-1030s1c1	CDS	NM_007199	11213	IRAK3	interleukin-1 receptor-associated kinase 3
TRCN0000000880	TRPS0000206677	CCGTCGATTACTTCACTTGAA	NM_014572.x-3750s1c1	3UTR	NM_014572	26524	LATS2	LATS, large tumor suppressor, homolog 2 (Drosophila)
TRCN0000000881	TRPS0000321146	GCCATGAAGACCCTAAGGAAA	NM_014572.x-2457s1c1	CDS	NM_014572	26524	LATS2	LATS, large tumor suppressor, homolog 2 (Drosophila)
TRCN0000000882	TRPS0000129605	CCTCTGGGATGATGTGTCTAA	NM_014572.x-2894s1c1	CDS	NM_014572	26524	LATS2	LATS, large tumor suppressor, homolog 2 (Drosophila)
TRCN0000000883	TRPS0000210273	CAGGACCAAACAGTGACACTT	NM_014572.x-490s1c1	CDS	NM_014572	26524	LATS2	LATS, large tumor suppressor, homolog 2 (Drosophila)
TRCN0000000884	TRPS0000186273	CTACTCGCCATACGCCTTTAA	NM_014572.x-2162s1c1	CDS	NM_014572	26524	LATS2	LATS, large tumor suppressor, homolog 2 (Drosophila)
TRCN0000000885	TRPS0000258711	GTCTCCATATTACTGTTTCAT	NM_014602.x-4724s1c1	3UTR	NM_014602	30849	PIK3R4	phosphoinositide-3-kinase, regulatory subunit 4
TRCN0000000886	TRPS0000220820	CCCTGAACAAGTGCTAAATAA	NM_014602.x-1361s1c1	CDS	NM_014602	30849	PIK3R4	phosphoinositide-3-kinase, regulatory subunit 4
TRCN0000000887	TRPS0000169280	CCTTCCTGTGTCATCCCAATT	NM_014602.x-2527s1c1	CDS	NM_014602	30849	PIK3R4	phosphoinositide-3-kinase, regulatory subunit 4
TRCN0000000888	TRPS0000305326	GCACCACCACTTTCTGAATTA	NM_014602.x-4227s1c1	CDS	NM_014602	30849	PIK3R4	phosphoinositide-3-kinase, regulatory subunit 4
TRCN0000000889	TRPS0000313642	GCAGTTTGATATTTGGAGTAA	NM_014683.x-4036s1c1	3UTR	NM_014683	9706	ULK2	unc-51-like kinase 2 (C. elegans)
TRCN0000000890	TRPS0000216380	CTCATCTATAATTGTGCTGTA	NM_014683.x-3390s1c1	CDS	NM_014683	9706	ULK2	unc-51-like kinase 2 (C. elegans)
TRCN0000000891	TRPS0000382139	GTCAGTGGTATTCGCATCAAA	NM_014683.x-945s1c1	CDS	NM_014683	9706	ULK2	unc-51-like kinase 2 (C. elegans)
TRCN0000000892	TRPS0000250143	GCAGACCGAAGATATTGTTTA	NM_014683.x-3449s1c1	CDS	NM_014683	9706	ULK2	unc-51-like kinase 2 (C. elegans)
TRCN0000000893	TRPS0000036470	TCCCAGAGAAACATCACCTTA	NM_014683.x-1208s1c1	CDS	NM_014683	9706	ULK2	unc-51-like kinase 2 (C. elegans)
TRCN0000000894	TRPS0000034054	TGGCTCTTTCAGTATGTCATT	NM_014720.x-4152s1c1	3UTR	NM_014720	9748	SLK	STE20-like kinase (yeast)
TRCN0000000895	TRPS0000172758	CCACCACTGATGAACCTGAAA	NM_014720.x-1665s1c1	CDS	NM_014720	9748	SLK	STE20-like kinase (yeast)
TRCN0000000896	TRPS0000061709	CGAGAAGGAAACAGAGCAAAT	NM_014720.x-3544s1c1	CDS	NM_014720	9748	SLK	STE20-like kinase (yeast)
TRCN0000000897	TRPS0000180735	CCATGACAGAACAGCAGTAAT	NM_014720.x-1747s1c1	CDS	NM_014720	9748	SLK	STE20-like kinase (yeast)
TRCN0000000898	TRPS0000254655	GCGTTACAATCAAAGACTTAT	NM_014720.x-3568s1c1	CDS	NM_014720	9748	SLK	STE20-like kinase (yeast)
TRCN0000000899	TRPS0000270624	GCACCGTCTTAGTTTACACAT	NM_014840.x-6133s1c1	3UTR	NM_014840	9891	NUAK1	NUAK family, SNF1-like kinase, 1
TRCN0000000900	TRPS0000321998	GCAGAGAGAATCAGGTTACTA	NM_014840.x-2796s1c1	CDS	NM_014840	9891	NUAK1	NUAK family, SNF1-like kinase, 1
TRCN0000000901	TRPS0000303914	GCTCGATGACAACTGCAATAT	NM_014840.x-1935s1c1	CDS	NM_014840	9891	NUAK1	NUAK family, SNF1-like kinase, 1
TRCN0000000902	TRPS0000336398	GATCCTGAAGAAGCGAAGCAA	NM_014840.x-2577s1c1	CDS	NM_014840	9891	NUAK1	NUAK family, SNF1-like kinase, 1
TRCN0000000903	TRPS0000017199	ACCATCCTCATATCATCAGTA	NM_014840.x-1712s1c1	CDS	NM_014840	9891	NUAK1	NUAK family, SNF1-like kinase, 1
TRCN0000000904	TRPS0000165813	CCTGTTTGTATGCGTTTGCTA	NM_015277.x-3959s1c1	3UTR	NM_015277	23327	NEDD4L	neural precursor cell expressed, developmentally down-regulated 4-like
TRCN0000000905	TRPS0000235164	CGCCTTGACTTACCTCCATAT	NM_015277.x-2887s1c1	CDS	NM_015277	23327	NEDD4L	neural precursor cell expressed, developmentally down-regulated 4-like
TRCN0000000906	TRPS0000262689	GCGGATGAGAATAGAGAACTT	NM_015277.x-268s1c1	CDS	NM_015277	23327	NEDD4L	neural precursor cell expressed, developmentally down-regulated 4-like
TRCN0000000907	TRPS0000255633	GCGAGTACCTATGAATGGATT	NM_015277.x-2772s1c1	CDS	NM_015277	23327	NEDD4L	neural precursor cell expressed, developmentally down-regulated 4-like
TRCN0000000908	TRPS0000283151	GTCAGAAATAATGGTCACAAA	NM_015277.x-2436s1c1	CDS	NM_015277	23327	NEDD4L	neural precursor cell expressed, developmentally down-regulated 4-like
TRCN0000000909	TRPS0000309618	GATCTGCGTGTGTCTCCATAT	NM_016440.x-1553s1c1	CDS	NM_016440	51231	VRK3	vaccinia related kinase 3
TRCN0000000910	TRPS0000180939	CTCACTCAAACTGGATGCCAA	NM_016440.x-778s1c1	CDS	NM_016440	51231	VRK3	vaccinia related kinase 3
TRCN0000000911	TRPS0000011875	AGTATCCAAGCGGCATTCAAA	NM_016440.x-209s1c1	CDS	NM_016440	51231	VRK3	vaccinia related kinase 3
TRCN0000000912	TRPS0000218897	CTCCTAAGAAAGTGAAATGGT	NM_016440.x-354s1c1	CDS	NM_016440	51231	VRK3	vaccinia related kinase 3
TRCN0000000913	TRPS0000260720	GCTGCTTTGTTGTCCTGATAT	NM_017593.x-2687s1c1	3UTR	NM_017593	55589	BMP2K	BMP2 inducible kinase
TRCN0000000914	TRPS0000381455	GCACTGGGATGTCTACTCTAT	NM_017593.x-953s1c1	CDS	NM_017593	55589	BMP2K	BMP2 inducible kinase
TRCN0000000915	TRPS0000301646	GACTGTGCTGTTAATTCAATT	NM_017593.x-539s1c1	CDS	NM_017593	55589	BMP2K	BMP2 inducible kinase
TRCN0000000916	TRPS0000283595	GATGGTGGGAACTATGTACTT	NM_017593.x-770s1c1	CDS	NM_017593	55589	BMP2K	BMP2 inducible kinase
TRCN0000000917	TRPS0000032482	TCTTCTATTCCTTCAGCTCTT	NM_017593.x-1237s1c1	CDS	NM_017593	55589	BMP2K	BMP2 inducible kinase
TRCN0000000918	TRPS0000064061	CCGAGGAGATAGCAACAATTA	NM_018979.x-3467s1c1	CDS	NM_018979	65125	WNK1	WNK lysine deficient protein kinase 1
TRCN0000000919	TRPS0000085355	CCGCGATCTTAAATGTGACAA	NM_018979.x-1041s1c1	CDS	NM_018979	65125	WNK1	WNK lysine deficient protein kinase 1
TRCN0000000920	TRPS0000371714	GCGTAGTTTCAAGTATCACAA	NM_018979.x-4232s1c1	CDS	NM_018979	65125	WNK1	WNK lysine deficient protein kinase 1
TRCN0000000921	TRPS0000270461	GCATCCATTCTACAGTCCTAT	NM_018979.x-2909s1c1	CDS	NM_018979	65125	WNK1	WNK lysine deficient protein kinase 1
TRCN0000000922	TRPS0000059986	CGGGTAGAATTAGCAGAGGAA	NM_018979.x-1456s1c1	CDS	NM_018979	65125	WNK1	WNK lysine deficient protein kinase 1
TRCN0000000923	TRPS0000083275	CCTCTCATTTGGGCACCTTAA	NM_021133.x-2844s1c1	3UTR	NM_021133	6041	RNASEL	ribonuclease L (2',5'-oligoisoadenylate synthetase-dependent)
TRCN0000000924	TRPS0000155816	CCGGAATTTGGGAGAACACAT	NM_021133.x-2165s1c1	CDS	NM_021133	6041	RNASEL	ribonuclease L (2',5'-oligoisoadenylate synthetase-dependent)
TRCN0000000925	TRPS0000341930	GCTGGTCCTCTATGTGGTAAA	NM_021133.x-1745s1c1	CDS	NM_021133	6041	RNASEL	ribonuclease L (2',5'-oligoisoadenylate synthetase-dependent)
TRCN0000000926	TRPS0000210047	CAAGAGCACATAGAGATTAAT	NM_021133.x-948s1c1	CDS	NM_021133	6041	RNASEL	ribonuclease L (2',5'-oligoisoadenylate synthetase-dependent)
TRCN0000000927	TRPS0000038300	TCCACAGAATATACCGCCCTA	NM_021133.x-1216s1c1	CDS	NM_021133	6041	RNASEL	ribonuclease L (2',5'-oligoisoadenylate synthetase-dependent)
TRCN0000000928	TRPS0000376560	GCCTTGATTATTGTTGCAGTT	NM_033116.x-1603s1c1	CDS	NM_033116	91754	NEK9	NIMA (never in mitosis gene a)- related kinase 9
TRCN0000000929	TRPS0000157709	CCGAGGAATGGAAGGTTTAAT	NM_033116.x-2367s1c1	CDS	NM_033116	91754	NEK9	NIMA (never in mitosis gene a)- related kinase 9
TRCN0000000930	TRPS0000081747	CCAAAGGAACTCAGACAGCAA	NM_033116.x-2843s1c1	CDS	NM_033116	91754	NEK9	NIMA (never in mitosis gene a)- related kinase 9
TRCN0000000931	TRPS0000329079	GTGAAGATCGTGCAAGGAATT	NM_033116.x-793s1c1	CDS	NM_033116	91754	NEK9	NIMA (never in mitosis gene a)- related kinase 9
TRCN0000000932	TRPS0000283960	GCTTGTGCCTTGTAAATAAAT	NM_033118.x-2646s1c1	3UTR	NM_033118	85366	MYLK2	myosin light chain kinase 2
TRCN0000000933	TRPS0000064701	CGGGCATTTGGTGAAGATCAT	NM_033118.x-1254s1c1	CDS	NM_033118	85366	MYLK2	myosin light chain kinase 2
TRCN0000000934	TRPS0000096767	CTATCTGGCAACTGGTACTTT	NM_033118.x-1483s1c1	CDS	NM_033118	85366	MYLK2	myosin light chain kinase 2
TRCN0000000935	TRPS0000337629	GACGGGAACTGCTCTTTAATT	NM_053028.x-5343s1c1	CDS	NM_053028	4638	MYLK	myosin light chain kinase
TRCN0000000936	TRPS0000000212	ACTGTCCTCTATGGCAATGAT	NM_053028.x-5030s1c1	CDS	NM_053028	4638	MYLK	myosin light chain kinase
TRCN0000000937	TRPS0000151016	CTGAAGGACTGCGCTGTTATT	NM_053028.x-1470s1c1	CDS	NM_053028	4638	MYLK	myosin light chain kinase
TRCN0000000938	TRPS0000131359	CGGCCAATTATCGTGTCTTCT	NM_080823.x-1231s1c1	CDS	NM_080823	6725	SRMS	src-related kinase lacking C-terminal regulatory tyrosine and N-terminal myristylation sites
TRCN0000000939	TRPS0000051319	CTACTACAAGGCCAACTGGAA	NM_080823.x-626s1c1	CDS	NM_080823	6725	SRMS	src-related kinase lacking C-terminal regulatory tyrosine and N-terminal myristylation sites
TRCN0000000940	TRPS0000017817	AGGTCATCAAGTCAGCCAACA	NM_080823.x-814s1c1	CDS	NM_080823	6725	SRMS	src-related kinase lacking C-terminal regulatory tyrosine and N-terminal myristylation sites
TRCN0000000941	TRPS0000069112	CTATGAAGGGATGACCAACCA	NM_080823.x-1319s1c1	CDS	NM_080823	6725	SRMS	src-related kinase lacking C-terminal regulatory tyrosine and N-terminal myristylation sites
TRCN0000000942	TRPS0000106693	CAATTATCGTGTCTTCTCCCA	NM_080823.x-1235s1c1	CDS	NM_080823	6725	SRMS	src-related kinase lacking C-terminal regulatory tyrosine and N-terminal myristylation sites
TRCN0000000943	TRPS0000352211	GCTGTCGATGATAGGTTAGAA	NM_139069.x-1319s1c1	3UTR	NM_139069	5601	MAPK9	mitogen-activated protein kinase 9
TRCN0000000944	TRPS0000294060	GATGTGTATTTGGTTATGGAA	NM_139069.x-356s1c1	CDS	NM_139069	5601	MAPK9	mitogen-activated protein kinase 9
TRCN0000000945	TRPS0000232471	CTGTGAGGAATTATGTCGAAA	NM_139069.x-813s1c1	CDS	NM_139069	5601	MAPK9	mitogen-activated protein kinase 9
TRCN0000000946	TRPS0000015994	AGGGATTGTTTGTGCTGCATT	NM_139069.x-160s1c1	CDS	NM_139069	5601	MAPK9	mitogen-activated protein kinase 9
TRCN0000000947	TRPS0000337820	GTTATTCACATGGAGCTGGAT	NM_139069.x-401s1c1	CDS	NM_139069	5601	MAPK9	mitogen-activated protein kinase 9
TRCN0000000948	TRPS0000358598	GCCATGCCTTTCTGTATAGTA	NM_002497.x-1571s1c1	3UTR	NM_002497	4751	NEK2	NIMA (never in mitosis gene a)-related kinase 2
TRCN0000000949	TRPS0000043534	CGTTCGTTACTATGATCGGAT	NM_002497.x-335s1c1	CDS	NM_002497	4751	NEK2	NIMA (never in mitosis gene a)-related kinase 2
TRCN0000000950	TRPS0000129178	CGTTACTCTGATGAATTGAAT	NM_002497.x-849s1c1	CDS	NM_002497	4751	NEK2	NIMA (never in mitosis gene a)-related kinase 2
TRCN0000000951	TRPS0000299154	GCAGACGAGCAAAGAAGAAAT	NM_002497.x-960s1c1	CDS	NM_002497	4751	NEK2	NIMA (never in mitosis gene a)-related kinase 2
TRCN0000000952	TRPS0000099542	CCTGTATTGAGTGAGCTGAAA	NM_002497.x-1035s1c1	CDS	NM_002497	4751	NEK2	NIMA (never in mitosis gene a)-related kinase 2
TRCN0000000953	TRPS0000031451	TGGGAAATAGAGAGTTGAGAT	NM_002944.x-7254s1c1	3UTR	NM_002944	6098	ROS1	c-ros oncogene 1 , receptor tyrosine kinase
TRCN0000000954	TRPS0000268255	GCTGCCTAAAGTCGTGTGTAA	NM_002944.x-294s1c1	CDS	NM_002944	6098	ROS1	c-ros oncogene 1 , receptor tyrosine kinase
TRCN0000000955	TRPS0000296001	GCTTGGAGTTTGTCTGCTGAA	NM_002944.x-6235s1c1	CDS	NM_002944	6098	ROS1	c-ros oncogene 1 , receptor tyrosine kinase
TRCN0000000956	TRPS0000233418	CCACAGCTACAAACCAACAAA	NM_002944.x-4143s1c1	CDS	NM_002944	6098	ROS1	c-ros oncogene 1 , receptor tyrosine kinase
TRCN0000000957	TRPS0000098472	CCTCACCTCATAACTCTTCTT	NM_002944.x-3659s1c1	CDS	NM_002944	6098	ROS1	c-ros oncogene 1 , receptor tyrosine kinase
TRCN0000000958	TRPS0000034756	TCACGACAACTTTCCAGCACA	NM_003180.x-1844s1c1	3UTR	NM_003180	6861	SYT5	synaptotagmin V
TRCN0000000959	TRPS0000092762	CCAGAGTTACATAGACAAGGT	NM_003180.x-742s1c1	CDS	NM_003180	6861	SYT5	synaptotagmin V
TRCN0000000960	TRPS0000236067	CTGAAGAAGATGGACGTAGGA	NM_003180.x-1304s1c1	CDS	NM_003180	6861	SYT5	synaptotagmin V
TRCN0000000961	TRPS0000086742	CCTATTACAACGAAGCTTTCA	NM_003180.x-1419s1c1	CDS	NM_003180	6861	SYT5	synaptotagmin V
TRCN0000000962	TRPS0000017636	AGATCCATACGTCAAGGTCCA	NM_003180.x-1333s1c1	CDS	NM_003180	6861	SYT5	synaptotagmin V
TRCN0000000963	TRPS0000391295	GATCAGCTCAGACATATTTCA	NM_003494.x-6841s1c1	3UTR	NM_003494	8291	DYSF	dysferlin, limb girdle muscular dystrophy 2B (autosomal recessive)
TRCN0000000964	TRPS0000056200	CCGTGTAATGTTTCAGGATAA	NM_003494.x-5526s1c1	CDS	NM_003494	8291	DYSF	dysferlin, limb girdle muscular dystrophy 2B (autosomal recessive)
TRCN0000000965	TRPS0000271136	GCTGGAAATGACCTTGGAGAT	NM_003494.x-6321s1c1	CDS	NM_003494	8291	DYSF	dysferlin, limb girdle muscular dystrophy 2B (autosomal recessive)
TRCN0000000966	TRPS0000230155	CCCTGCTGAGAAGATGTACTA	NM_003494.x-3453s1c1	CDS	NM_003494	8291	DYSF	dysferlin, limb girdle muscular dystrophy 2B (autosomal recessive)
TRCN0000000967	TRPS0000127884	CCTGCGTTGTATTATCTGGAA	NM_003494.x-5805s1c1	CDS	NM_003494	8291	DYSF	dysferlin, limb girdle muscular dystrophy 2B (autosomal recessive)
TRCN0000000968	TRPS0000038559	TCAGAGCTTTGTCACTTGCCA	NM_004517.x-1688s1c1	3UTR	NM_004517	3611	ILK	integrin-linked kinase
TRCN0000000969	TRPS0000228249	CCGAAATGGAACCCTGAACAA	NM_004517.x-687s1c1	CDS	NM_004517	3611	ILK	integrin-linked kinase
TRCN0000000970	TRPS0000377240	GCAGTACAAGGCAGACATCAA	NM_004517.x-417s1c1	CDS	NM_004517	3611	ILK	integrin-linked kinase
TRCN0000000971	TRPS0000084995	CTGAACAAACACTCTGGCATT	NM_004517.x-700s1c1	CDS	NM_004517	3611	ILK	integrin-linked kinase
TRCN0000000972	TRPS0000025474	TCCCACGACATGCACTCAATA	NM_004517.x-1100s1c1	CDS	NM_004517	3611	ILK	integrin-linked kinase
TRCN0000000973	TRPS0000231883	CTAGTAAGAGAGGTGGTAATT	NM_004760.x-1998s1c1	3UTR	NM_004760	9263	STK17A	serine/threonine kinase 17a
TRCN0000000974	TRPS0000048337	CCTATAAGCATGGCAACAGAT	NM_004760.x-832s1c1	CDS	NM_004760	9263	STK17A	serine/threonine kinase 17a
TRCN0000000975	TRPS0000254449	GAGATTGCTGTACTTGAACTA	NM_004760.x-439s1c1	CDS	NM_004760	9263	STK17A	serine/threonine kinase 17a
TRCN0000000976	TRPS0000052063	CAGAGCAGTATTCAAGAGCCT	NM_004760.x-1084s1c1	CDS	NM_004760	9263	STK17A	serine/threonine kinase 17a
TRCN0000000977	TRPS0000055384	CCTGTGTACCTGATGGAAGTT	NM_004850.x-5239s1c1	3UTR	NM_004850	9475	ROCK2	Rho-associated, coiled-coil containing protein kinase 2
TRCN0000000978	TRPS0000296353	GCACAGTTTGAGAAGCAGCTA	NM_004850.x-3506s1c1	CDS	NM_004850	9475	ROCK2	Rho-associated, coiled-coil containing protein kinase 2
TRCN0000000979	TRPS0000313396	GCCTTGCATATTGGTCTGGAT	NM_004850.x-3827s1c1	CDS	NM_004850	9475	ROCK2	Rho-associated, coiled-coil containing protein kinase 2
TRCN0000000980	TRPS0000158147	CGTTGCCATATTAAGTGTCAT	NM_004850.x-4337s1c1	CDS	NM_004850	9475	ROCK2	Rho-associated, coiled-coil containing protein kinase 2
TRCN0000000981	TRPS0000218997	CCTCAAACAGTCACAGCAGAA	NM_004850.x-2755s1c1	CDS	NM_004850	9475	ROCK2	Rho-associated, coiled-coil containing protein kinase 2
TRCN0000000982	TRPS0000206051	CTGTCCTGAGAAGCATGTAAT	NM_004938.x-5734s1c1	3UTR	NM_004938	1612	DAPK1	death-associated protein kinase 1
TRCN0000000983	TRPS0000097348	CCACGTCGATACCTTGAAATT	NM_004938.x-1605s1c1	CDS	NM_004938	1612	DAPK1	death-associated protein kinase 1
TRCN0000000984	TRPS0000147384	CGGCACCTCTTACAATTCCAT	NM_004938.x-4590s1c1	CDS	NM_004938	1612	DAPK1	death-associated protein kinase 1
TRCN0000000985	TRPS0000113940	CGACATCCAGAACGCTTATTT	NM_004938.x-2727s1c1	CDS	NM_004938	1612	DAPK1	death-associated protein kinase 1
TRCN0000000986	TRPS0000287704	GCCTACGCTTATGAAACCAAA	NM_005307.x-753s1c1	CDS	NM_005307	2868	GRK4	G protein-coupled receptor kinase 4
TRCN0000000987	TRPS0000005292	AGGATGTTACTCACCAAGAAT	NM_005307.x-1266s1c1	CDS	NM_005307	2868	GRK4	G protein-coupled receptor kinase 4
TRCN0000000988	TRPS0000005152	ACCCGTAACAAAGAACACATT	NM_005307.x-542s1c1	CDS	NM_005307	2868	GRK4	G protein-coupled receptor kinase 4
TRCN0000000989	TRPS0000250116	GAATATGAAGTTGCCGATGAT	NM_005307.x-267s1c1	CDS	NM_005307	2868	GRK4	G protein-coupled receptor kinase 4
TRCN0000000990	TRPS0000048117	CTTGGCTGTCTGATCTATGAA	NM_005307.x-1116s1c1	CDS	NM_005307	2868	GRK4	G protein-coupled receptor kinase 4
TRCN0000000991	TRPS0000029579	TGTTTAGGCTTCTGTGTGTTT	NM_005923.x-4884s1c1	3UTR	NM_005923	4217	MAP3K5	mitogen-activated protein kinase kinase kinase 5
TRCN0000000992	TRPS0000122932	CGGGACATAAAGGGTGACAAT	NM_005923.x-2765s1c1	CDS	NM_005923	4217	MAP3K5	mitogen-activated protein kinase kinase kinase 5
TRCN0000000993	TRPS0000307281	GCTTACCTCTTGTGGATCGTT	NM_005923.x-1110s1c1	CDS	NM_005923	4217	MAP3K5	mitogen-activated protein kinase kinase kinase 5
TRCN0000000994	TRPS0000381962	GAAGACACTATAAGCCGGTTT	NM_005923.x-4331s1c1	CDS	NM_005923	4217	MAP3K5	mitogen-activated protein kinase kinase kinase 5
TRCN0000000995	TRPS0000142381	CTGCGGAGAAAGAGATGTCAA	NM_005923.x-3373s1c1	CDS	NM_005923	4217	MAP3K5	mitogen-activated protein kinase kinase kinase 5
TRCN0000000996	TRPS0000255459	GTCCATATACTTGTCTAACTA	NM_006258.x-3498s1c1	3UTR	NM_006258	5592	PRKG1	protein kinase, cGMP-dependent, type I
TRCN0000000997	TRPS0000357039	GCTGGATGATGTTTCTAATAA	NM_006258.x-1084s1c1	CDS	NM_006258	5592	PRKG1	protein kinase, cGMP-dependent, type I
TRCN0000000998	TRPS0000153343	CAGAACATTTAAGGACAGCAA	NM_006258.x-1378s1c1	CDS	NM_006258	5592	PRKG1	protein kinase, cGMP-dependent, type I
TRCN0000000999	TRPS0000295023	GCGCCACATAATCAACAGAAA	NM_006301.x-2752s1c1	3UTR	NM_006301	7786	MAP3K12	mitogen-activated protein kinase kinase kinase 12
TRCN0000001000	TRPS0000178637	CCTCAAAGAAACCGACATCAA	NM_006301.x-566s1c1	CDS	NM_006301	7786	MAP3K12	mitogen-activated protein kinase kinase kinase 12
TRCN0000001001	TRPS0000173090	CAGGGAGCACTATGAAAGGAA	NM_006301.x-1373s1c1	CDS	NM_006301	7786	MAP3K12	mitogen-activated protein kinase kinase kinase 12
TRCN0000001002	TRPS0000210607	CTACGACGATGTGGTGAAGAT	NM_006301.x-833s1c1	CDS	NM_006301	7786	MAP3K12	mitogen-activated protein kinase kinase kinase 12
TRCN0000001003	TRPS0000001189	AGAAACCGACATCAAGCACTT	NM_006301.x-572s1c1	CDS	NM_006301	7786	MAP3K12	mitogen-activated protein kinase kinase kinase 12
TRCN0000001004	TRPS0000043685	CCCTGCTTGACTGTATATTAT	NM_013233.x-2964s1c1	3UTR	NM_013233	27347	STK39	serine threonine kinase 39 (STE20/SPS1 homolog, yeast)
TRCN0000001005	TRPS0000165816	CCTGATGAAGTGAAGCTGATT	NM_013233.x-1770s1c1	CDS	NM_013233	27347	STK39	serine threonine kinase 39 (STE20/SPS1 homolog, yeast)
TRCN0000001006	TRPS0000145825	CGGTCAGATTCACAGGGATTT	NM_013233.x-737s1c1	CDS	NM_013233	27347	STK39	serine threonine kinase 39 (STE20/SPS1 homolog, yeast)
TRCN0000001007	TRPS0000003011	AGAGGCAATAATAGCAACAAT	NM_013233.x-674s1c1	CDS	NM_013233	27347	STK39	serine threonine kinase 39 (STE20/SPS1 homolog, yeast)
TRCN0000001008	TRPS0000180326	CTACACAGAAACGGTCAGATT	NM_013233.x-726s1c1	CDS	NM_013233	27347	STK39	serine threonine kinase 39 (STE20/SPS1 homolog, yeast)
TRCN0000001009	TRPS0000291694	GCAAGTTAAGAGGAAATTCAA	NM_002662.x-437s1c1	CDS	NM_002662	5337	PLD1	phospholipase D1, phosphatidylcholine-specific
TRCN0000001010	TRPS0000273671	GCAATGGAAGAGGCAAATGAA	NM_002662.x-1197s1c1	CDS	NM_002662	5337	PLD1	phospholipase D1, phosphatidylcholine-specific
TRCN0000001011	TRPS0000304504	GCGTCTACATCCCAACATAAA	NM_002662.x-1412s1c1	CDS	NM_002662	5337	PLD1	phospholipase D1, phosphatidylcholine-specific
TRCN0000001012	TRPS0000292117	GAGCAGTTAGAGTAGGTGAAT	NM_002752.x-1567s1c1	3UTR	NM_002752	5601	MAPK9	mitogen-activated protein kinase 9
TRCN0000001013	TRPS0000294060	GATGTGTATTTGGTTATGGAA	NM_002752.x-356s1c1	CDS	NM_002752	5601	MAPK9	mitogen-activated protein kinase 9
TRCN0000001014	TRPS0000232471	CTGTGAGGAATTATGTCGAAA	NM_002752.x-813s1c1	CDS	NM_002752	5601	MAPK9	mitogen-activated protein kinase 9
TRCN0000001015	TRPS0000015994	AGGGATTGTTTGTGCTGCATT	NM_002752.x-160s1c1	CDS	NM_002752	5601	MAPK9	mitogen-activated protein kinase 9
TRCN0000001016	TRPS0000337820	GTTATTCACATGGAGCTGGAT	NM_002752.x-401s1c1	CDS	NM_002752	5601	MAPK9	mitogen-activated protein kinase 9
TRCN0000001017	TRPS0000141463	CCAATGATGCTTACTACAGAA	NM_002753.x-1861s1c1	3UTR	NM_002753	5602	MAPK10	mitogen-activated protein kinase 10
TRCN0000001018	TRPS0000311175	GTAAGAAACTATGTGGAGAAT	NM_002753.x-1103s1c1	CDS	NM_002753	5602	MAPK10	mitogen-activated protein kinase 10
TRCN0000001019	TRPS0000326599	GCCGCGTATGATGCTGTCCTT	NM_002753.x-461s1c1	CDS	NM_002753	5602	MAPK10	mitogen-activated protein kinase 10
TRCN0000001020	TRPS0000284259	GCCATTAAGAAGCTCAGCAGA	NM_002753.x-494s1c1	CDS	NM_002753	5602	MAPK10	mitogen-activated protein kinase 10
TRCN0000001021	TRPS0000182063	CGACGCCTTACAGCATCCCTA	NM_002753.x-1276s1c1	CDS	NM_002753	5602	MAPK10	mitogen-activated protein kinase 10
TRCN0000001022	TRPS0000049943	CTGGGTACATTTGATCTGACT	NM_005347.x-1639s1c1	CDS	NM_005347	3309	HSPA5	heat shock 70kDa protein 5 (glucose-regulated protein, 78kDa)
TRCN0000001023	TRPS0000074679	CAAGGTCTATGAAGGTGAAAG	NM_005347.x-1593s1c1	CDS	NM_005347	3309	HSPA5	heat shock 70kDa protein 5 (glucose-regulated protein, 78kDa)
TRCN0000001024	TRPS0000215742	CTTGTTGGTGGCTCGACTCGA	NM_005347.x-1285s1c1	CDS	NM_005347	3309	HSPA5	heat shock 70kDa protein 5 (glucose-regulated protein, 78kDa)
TRCN0000001025	TRPS0000339238	GTTATCCTACACCTGAAAGAA	NM_005348.x-616s1c1	CDS	NM_005348	3320	HSP90AA1	heat shock protein 90kDa alpha (cytosolic), class A member 1
TRCN0000001026	TRPS0000101978	CCAGAATGAAGGAGAACCAGA	NM_005348.x-1505s1c1	CDS	NM_005348	3320	HSP90AA1	heat shock protein 90kDa alpha (cytosolic), class A member 1
TRCN0000001027	TRPS0000030458	TCATCAATACTTTCTACTCGA	NM_005348.x-158s1c1	CDS	NM_005348	3320	HSP90AA1	heat shock protein 90kDa alpha (cytosolic), class A member 1
TRCN0000001028	TRPS0000306596	GAAGGATGGTGACAAGAAGAA	NM_005348.x-867s1c1	CDS	NM_005348	3320	HSP90AA1	heat shock protein 90kDa alpha (cytosolic), class A member 1
TRCN0000001029	TRPS0000090774	CGGGCTGTTCTCCTGCATCAT	NM_005456.x-1601s1c1	CDS	NM_005456	9479	MAPK8IP1	mitogen-activated protein kinase 8 interacting protein 1
TRCN0000001030	TRPS0000055517	CCCAATTTCAGGCTCACCCAT	NM_005456.x-261s1c1	CDS	NM_005456	9479	MAPK8IP1	mitogen-activated protein kinase 8 interacting protein 1
TRCN0000001031	TRPS0000353938	GTCGGCCATCGGAGAGGAATA	NM_005456.x-1442s1c1	CDS	NM_005456	9479	MAPK8IP1	mitogen-activated protein kinase 8 interacting protein 1
TRCN0000001032	TRPS0000071626	CTTTCCTGCCTATTACGCCAT	NM_005456.x-1784s1c1	CDS	NM_005456	9479	MAPK8IP1	mitogen-activated protein kinase 8 interacting protein 1
TRCN0000001033	TRPS0000072861	CCACCGTCACACAGTATTTAT	NM_006221.x-616s1c1	3UTR	NM_006221	5300	PIN1	peptidylprolyl cis/trans isomerase, NIMA-interacting 1
TRCN0000001034	TRPS0000093110	CCAGAAGATCAAGTCGGGAGA	NM_006221.x-303s1c1	CDS	NM_006221	5300	PIN1	peptidylprolyl cis/trans isomerase, NIMA-interacting 1
TRCN0000001035	TRPS0000010538	AGAAGCCATTTGAAGACGCCT	NM_006221.x-416s1c1	CDS	NM_006221	5300	PIN1	peptidylprolyl cis/trans isomerase, NIMA-interacting 1
TRCN0000001036	TRPS0000010146	AGGAGAAGATCACCCGGACCA	NM_006221.x-248s1c1	CDS	NM_006221	5300	PIN1	peptidylprolyl cis/trans isomerase, NIMA-interacting 1
TRCN0000001037	TRPS0000183181	CTTTAGGTTCTTTGCTGCATT	NM_021913.x-4575s1c1	3UTR	NM_021913	558	AXL	AXL receptor tyrosine kinase
TRCN0000001038	TRPS0000283857	GCGGTCTGCATGAAGGAATTT	NM_021913.x-2214s1c1	CDS	NM_021913	558	AXL	AXL receptor tyrosine kinase
TRCN0000001039	TRPS0000047942	CGAAAGAAGGAGACCCGTTAT	NM_021913.x-1881s1c1	CDS	NM_021913	558	AXL	AXL receptor tyrosine kinase
TRCN0000001040	TRPS0000216922	CGAAATCCTCTATGTCAACAT	NM_021913.x-2909s1c1	CDS	NM_021913	558	AXL	AXL receptor tyrosine kinase
TRCN0000001041	TRPS0000314075	GCTGTGAAGACGATGAAGATT	NM_021913.x-2151s1c1	CDS	NM_021913	558	AXL	AXL receptor tyrosine kinase
TRCN0000001042	TRPS0000067993	CTGTTATCTAGCTGAGTTCAT	NM_022051.x-4747s1c1	3UTR	NM_022051	54583	EGLN1	egl nine homolog 1 (C. elegans)
TRCN0000001043	TRPS0000361333	GACGACCTGATACGCCACTGT	NM_022051.x-3985s1c1	CDS	NM_022051	54583	EGLN1	egl nine homolog 1 (C. elegans)
TRCN0000001044	TRPS0000004287	ACGCCACTGTAACGGGAAGCT	NM_022051.x-3996s1c1	CDS	NM_022051	54583	EGLN1	egl nine homolog 1 (C. elegans)
TRCN0000001045	TRPS0000024446	TGGAGATGGAAGATGTGTGAC	NM_022051.x-4110s1c1	CDS	NM_022051	54583	EGLN1	egl nine homolog 1 (C. elegans)
TRCN0000001046	TRPS0000057082	CTTGGTATTGAGCACGTATTT	NM_022073.x-2244s1c1	3UTR	NM_022073	112399	EGLN3	egl nine homolog 3 (C. elegans)
TRCN0000001047	TRPS0000251766	GCTGGGCAAATACTACGTCAA	NM_022073.x-652s1c1	CDS	NM_022073	112399	EGLN3	egl nine homolog 3 (C. elegans)
TRCN0000001048	TRPS0000079132	CACCTGCATCTACTATCTGAA	NM_022073.x-766s1c1	CDS	NM_022073	112399	EGLN3	egl nine homolog 3 (C. elegans)
TRCN0000001049	TRPS0000142876	CTACGTCAAGGAGAGGTCTAA	NM_022073.x-664s1c1	CDS	NM_022073	112399	EGLN3	egl nine homolog 3 (C. elegans)
TRCN0000001050	TRPS0000311344	GTGGCTTGCTATCCGGGAAAT	NM_022073.x-692s1c1	CDS	NM_022073	112399	EGLN3	egl nine homolog 3 (C. elegans)
TRCN0000001051	TRPS0000003171	ATGGTTATCTTACGACTGTTA	NM_138621.x-541s1c1	CDS	NM_138621	10018	BCL2L11	BCL2-like 11 (apoptosis facilitator)
TRCN0000001052	TRPS0000288832	GTCTCGATCCTCCAGTGGGTA	NM_138621.x-267s1c1	CDS	NM_138621	10018	BCL2L11	BCL2-like 11 (apoptosis facilitator)
TRCN0000001053	TRPS0000012467	ACGAATGGTTATCTTACGACT	NM_138621.x-537s1c1	CDS	NM_138621	10018	BCL2L11	BCL2-like 11 (apoptosis facilitator)
TRCN0000001054	TRPS0000004597	AGCCGAAGACCACCCACGAAT	NM_138621.x-522s1c1	CDS	NM_138621	10018	BCL2L11	BCL2-like 11 (apoptosis facilitator)
TRCN0000001055	TRPS0000304429	GAGTCGGTTAGTCATTGATAG	NM_139049.x-1335s1c1	3UTR	NM_139049	5599	MAPK8	mitogen-activated protein kinase 8
TRCN0000001056	TRPS0000282375	GCCCAGTAATATAGTAGTAAA	NM_139049.x-476s1c1	CDS	NM_139049	5599	MAPK8	mitogen-activated protein kinase 8
TRCN0000001057	TRPS0000386909	GTCTGGTATGATCCTTCTGAA	NM_139049.x-984s1c1	CDS	NM_139049	5599	MAPK8	mitogen-activated protein kinase 8
TRCN0000001058	TRPS0000334230	GCTTCTTCCTATTTGCCATGG	NM_002137.x-1196s1c1	3UTR	NM_002137	3181	HNRNPA2B1	heterogeneous nuclear ribonucleoprotein A2/B1
TRCN0000001059	TRPS0000122586	CAGAAATACCATACCATCAAT	NM_002137.x-647s1c1	CDS	NM_002137	3181	HNRNPA2B1	heterogeneous nuclear ribonucleoprotein A2/B1
TRCN0000001060	TRPS0000001238	AGACAAGAAATGCAGGAAGTT	NM_002137.x-701s1c1	CDS	NM_002137	3181	HNRNPA2B1	heterogeneous nuclear ribonucleoprotein A2/B1
TRCN0000001061	TRPS0000038299	TGACAACTATGGAGGAGGAAA	NM_002137.x-994s1c1	CDS	NM_002137	3181	HNRNPA2B1	heterogeneous nuclear ribonucleoprotein A2/B1
TRCN0000001062	TRPS0000150601	CTCAACGTCAAGTACAACAAT	NM_002819.x-874s1c1	CDS	NM_002819	5725	PTBP1	polypyrimidine tract binding protein 1
TRCN0000001063	TRPS0000004359	AGCAAACGGAAATGACAGCAA	NM_002819.x-201s1c1	CDS	NM_002819	5725	PTBP1	polypyrimidine tract binding protein 1
TRCN0000001064	TRPS0000092682	CATGAGTATTTAGAGGAAGTA	NM_002880.x-2399s1c1	3UTR	NM_002880	5894	RAF1	v-raf-1 murine leukemia viral oncogene homolog 1
TRCN0000001065	TRPS0000351061	GCTTCCTTATTCTCACATCAA	NM_002880.x-1764s1c1	CDS	NM_002880	5894	RAF1	v-raf-1 murine leukemia viral oncogene homolog 1
TRCN0000001066	TRPS0000129186	CGGAGATGTTGCAGTAAAGAT	NM_002880.x-1236s1c1	CDS	NM_002880	5894	RAF1	v-raf-1 murine leukemia viral oncogene homolog 1
TRCN0000001067	TRPS0000191587	CAAGCAAAGAACAGTGGTCAA	NM_002880.x-321s1c1	CDS	NM_002880	5894	RAF1	v-raf-1 murine leukemia viral oncogene homolog 1
TRCN0000001068	TRPS0000344822	GAGACATGAAATCCAACAATA	NM_002880.x-1529s1c1	CDS	NM_002880	5894	RAF1	v-raf-1 murine leukemia viral oncogene homolog 1
TRCN0000001069	TRPS0000289689	GCGTTCTCTTCACTGGTTTAT	NM_004630.x-3014s1c1	3UTR	NM_004630	7536	SF1	splicing factor 1
TRCN0000001070	TRPS0000098776	CCACAAGATGAGTACCCAGAA	NM_004630.x-809s1c1	CDS	NM_004630	7536	SF1	splicing factor 1
TRCN0000001071	TRPS0000114609	CGTAGCATCGAGTGTCTTCTT	NM_004630.x-2141s1c1	CDS	NM_004630	7536	SF1	splicing factor 1
TRCN0000001072	TRPS0000363360	GCTCGCTTAAATGGGACCCTT	NM_004630.x-1124s1c1	CDS	NM_004630	7536	SF1	splicing factor 1
TRCN0000001073	TRPS0000013594	AGGATAAAGCACGGATGGATA	NM_004630.x-1293s1c1	CDS	NM_004630	7536	SF1	splicing factor 1
TRCN0000001074	TRPS0000342702	GCTTCAATACTTCTGCCGCTT	NM_004906.x-1593s1c1	3UTR	NM_004906	9589	WTAP	Wilms tumor 1 associated protein
TRCN0000001075	TRPS0000354524	GAGAAAGCAGTGAGTGGGAAA	NM_004906.x-1315s1c1	CDS	NM_004906	9589	WTAP	Wilms tumor 1 associated protein
TRCN0000001076	TRPS0000024082	TCGAATGCTTATCCAGGAGAA	NM_004906.x-705s1c1	CDS	NM_004906	9589	WTAP	Wilms tumor 1 associated protein
TRCN0000001077	TRPS0000281772	GTTATGGCAAGAGATGAGTTA	NM_004906.x-280s1c1	CDS	NM_004906	9589	WTAP	Wilms tumor 1 associated protein
TRCN0000001078	TRPS0000022678	TCTCTCACACACCAATCAAAT	NM_004906.x-1264s1c1	CDS	NM_004906	9589	WTAP	Wilms tumor 1 associated protein
TRCN0000001079	TRPS0000170554	CACAGGAAGAGACCAAAGTAT	NM_005043.x-1287s1c1	CDS	NM_005043	5609	MAP2K7	mitogen-activated protein kinase kinase 7
TRCN0000001080	TRPS0000087280	CTACAAGAACTGCAAGACGGA	NM_005043.x-1157s1c1	CDS	NM_005043	5609	MAP2K7	mitogen-activated protein kinase kinase 7
TRCN0000001081	TRPS0000310742	GACCAACAAATCTCAAGCCCT	NM_005066.x-2993s1c1	3UTR	NM_005066	6421	SFPQ	splicing factor proline/glutamine-rich (polypyrimidine tract binding protein associated)
TRCN0000001082	TRPSC000345166	GCCCAGAAGAATCCAATGTAT	NM_005066.x-1475s1c1	CDS	NM_005066	6421	SFPQ	splicing factor proline/glutamine-rich (polypyrimidine tract binding protein associated)
TRCN0000001083	TRPS0000126811	CCCTTTCTGTTCGTAATCTTT	NM_005066.x-1200s1c1	CDS	NM_005066	6421	SFPQ	splicing factor proline/glutamine-rich (polypyrimidine tract binding protein associated)
TRCN0000001084	TRPSC000354582	GCGCCAAAGAGAGGAAAGTTA	NM_005066.x-1855s1c1	CDS	NM_005066	6421	SFPQ	splicing factor proline/glutamine-rich (polypyrimidine tract binding protein associated)
TRCN0000001085	TRPS0000033078	TGCCTCAACCTTCATATTAAA	NM_005146.x-2468s1c1	3UTR	NM_005146	9092	SART1	squamous cell carcinoma antigen recognized by T cells
TRCN0000001086	TRPS0000277545	GACTAACAAACTCCGGGCAAA	NM_005146.x-408s1c1	CDS	NM_005146	9092	SART1	squamous cell carcinoma antigen recognized by T cells
TRCN0000001087	TRPS0000369445	GCGGAAGAAGAAGCCTGACTA	NM_005146.x-960s1c1	CDS	NM_005146	9092	SART1	squamous cell carcinoma antigen recognized by T cells
TRCN0000001088	TRPS0000274547	GCCGTGTACTGCATCGAGGAT	NM_005146.x-2053s1c1	CDS	NM_005146	9092	SART1	squamous cell carcinoma antigen recognized by T cells
TRCN0000001089	TRPS0000125946	CAGACCACCGTTAATCCAGAT	NM_006491.x-475s1c1	CDS	NM_006491	4857	NOVA1	neuro-oncological ventral antigen 1
TRCN0000001090	TRPS0000035287	TACCTAGTTATGCTGCTGGAT	NM_006491.x-227s1c1	CDS	NM_006491	4857	NOVA1	neuro-oncological ventral antigen 1
TRCN0000001091	TRPS0000013380	ACCAAGTCCTCTCCATCTGAT	NM_006491.x-532s1c1	CDS	NM_006491	4857	NOVA1	neuro-oncological ventral antigen 1
TRCN0000001092	TRPS0000027385	TCTATAATTGGGAAGGGAGGA	NM_006491.x-247s1c1	CDS	NM_006491	4857	NOVA1	neuro-oncological ventral antigen 1
TRCN0000001093	TRPS0000324807	GCAACCACGAAACCTGTAATA	NM_006924.x-1965s1c1	3UTR	NM_006924	6426	SFRS1	splicing factor, arginine/serine-rich 1
TRCN0000001094	TRPS0000009268	ACTGCCTACATCCGGGTTAAA	NM_006924.x-649s1c1	CDS	NM_006924	6426	SFRS1	splicing factor, arginine/serine-rich 1
TRCN0000001095	TRPS0000346968	GAAGCAGGTGATGTATGTTAT	NM_006924.x-517s1c1	CDS	NM_006924	6426	SFRS1	splicing factor, arginine/serine-rich 1
TRCN0000001096	TRPS0000014276	ACTTACCTCCAGACATCCGAA	NM_006924.x-155s1c1	CDS	NM_006924	6426	SFRS1	splicing factor, arginine/serine-rich 1
TRCN0000001097	TRPS0000383769	GCTACTTTACTCCAACTTATT	NM_012062.x-1063s1c1	CDS	NM_012062	10059	DNM1L	dynamin 1-like
TRCN0000001098	TRPS0000200887	CGGTTCATCAGTAATCCTAAT	NM_012062.x-586s1c1	CDS	NM_012062	10059	DNM1L	dynamin 1-like
TRCN0000001099	TRPS0000097332	CGAGATTGTGAGGTTATTGAA	NM_012062.x-1996s1c1	CDS	NM_012062	10059	DNM1L	dynamin 1-like
TRCN0000001100	TRPS0000296746	GCTGTTGAGGAAGAAGACGCT	NM_012181.x-199s1c1	CDS	NM_012181	23770	FKBP8	FK506 binding protein 8, 38kDa
TRCN0000001101	TRPS0000031202	TGAAGGTGAAGTGTCTGAACA	NM_012181.x-711s1c1	CDS	NM_012181	23770	FKBP8	FK506 binding protein 8, 38kDa
TRCN0000001102	TRPS0000192874	CAACAAGACGATCCACGCAGA	NM_012181.x-916s1c1	CDS	NM_012181	23770	FKBP8	FK506 binding protein 8, 38kDa
TRCN0000001103	TRPS0000017439	ACGTCGCTGGAGAATGGCACA	NM_012181.x-284s1c1	CDS	NM_012181	23770	FKBP8	FK506 binding protein 8, 38kDa
TRCN0000001104	TRPS0000014063	ACAGGTCTCTCCAAAGTGAAT	NM_012245.x-1641s1c1	3UTR	NM_012245	22938	SNW1	SNW domain containing 1
TRCN0000001105	TRPS0000203752	CCAGAATAAAGACCAACAGAT	NM_012245.x-1421s1c1	CDS	NM_012245	22938	SNW1	SNW domain containing 1
TRCN0000001106	TRPS0000173096	CCTAGCCGAAAGATGACTGTA	NM_012245.x-724s1c1	CDS	NM_012245	22938	SNW1	SNW domain containing 1
TRCN0000001107	TRPS0000247857	GAACAACAAGAGTGGAAGATT	NM_012245.x-748s1c1	CDS	NM_012245	22938	SNW1	SNW domain containing 1
TRCN0000001108	TRPS0000056201	CCCAAGGAACACGAGCATGAA	NM_012245.x-1594s1c1	CDS	NM_012245	22938	SNW1	SNW domain containing 1
TRCN0000001109	TRPS0000156428	CTGTTATCATTCCTTGGTTAT	NM_021190.x-1782s1c1	3UTR	NM_021190	58155	PTBP2	polypyrimidine tract binding protein 2
TRCN0000001110	TRPS0000363363	GCCACCCTTCACCTATCTAAT	NM_021190.x-1415s1c1	CDS	NM_021190	58155	PTBP2	polypyrimidine tract binding protein 2
TRCN0000001111	TRPS0000160340	CCCTAGATGGTCAGAATATTT	NM_021190.x-762s1c1	CDS	NM_021190	58155	PTBP2	polypyrimidine tract binding protein 2
TRCN0000001112	TRPS0000118601	CATCTTCGTAACCAACCAATA	NM_021190.x-410s1c1	CDS	NM_021190	58155	PTBP2	polypyrimidine tract binding protein 2
TRCN0000001113	TRPS0000118602	CTCCTTCTCGTGTACTTCATA	NM_021190.x-219s1c1	CDS	NM_021190	58155	PTBP2	polypyrimidine tract binding protein 2
TRCN0000001114	TRPS0000298612	GTGTCTGCTAATGTAAACTTT	NM_024424.x-2140s1c1	3UTR	NM_024424	7490	WT1	Wilms tumor 1
TRCN0000001115	TRPS0000135270	CCCAACCACTCATTCAAGCAT	NM_024424.x-904s1c1	CDS	NM_024424	7490	WT1	Wilms tumor 1
TRCN0000001116	TRPS0000253703	GCCGCCTCACTCCTTCATCAA	NM_024424.x-588s1c1	CDS	NM_024424	7490	WT1	Wilms tumor 1
TRCN0000001117	TRPS0000383386	GAAACCATACCAGTGTGACTT	NM_024424.x-1440s1c1	CDS	NM_024424	7490	WT1	Wilms tumor 1
TRCN0000001118	TRPS0000232055	CCGTTTGATGAGAGGCTGTTT	NM_178001.x-1441s1c1	3UTR	NM_178001	5524	PPP2R4	protein phosphatase 2A activator, regulatory subunit 4
TRCN0000001119	TRPS0000389031	GATCCACACAGTTCCAGACAT	NM_178001.x-354s1c1	CDS	NM_178001	5524	PPP2R4	protein phosphatase 2A activator, regulatory subunit 4
TRCN0000001120	TRPS0000375503	GCCATTGAGAAACTAGTCGCT	NM_178001.x-589s1c1	CDS	NM_178001	5524	PPP2R4	protein phosphatase 2A activator, regulatory subunit 4
TRCN0000001121	TRPS0000090091	CATACGCTGACTACATCGGAT	NM_178001.x-398s1c1	CDS	NM_178001	5524	PPP2R4	protein phosphatase 2A activator, regulatory subunit 4
TRCN0000001122	TRPS0000128989	CGATCTTATAGGTTACTGGAA	NM_003587.x-422s1c1	CDS	NM_003587	8449	DHX16	DEAH (Asp-Glu-Ala-His) box polypeptide 16
TRCN0000001123	TRPS0000088899	CGAGACACTGATACCTTGGAT	NM_003587.x-281s1c1	CDS	NM_003587	8449	DHX16	DEAH (Asp-Glu-Ala-His) box polypeptide 16
TRCN0000001124	TRPS0000162163	CGCTACCACATGCCCAAGGAA	NM_003587.x-1028s1c1	CDS	NM_003587	8449	DHX16	DEAH (Asp-Glu-Ala-His) box polypeptide 16
TRCN0000001125	TRPS0000059369	CCTGGTTCTGCTAAATGTTTA	NM_003587.x-2773s1c1	CDS	NM_003587	8449	DHX16	DEAH (Asp-Glu-Ala-His) box polypeptide 16
TRCN0000001126	TRPS0000011405	AGCCTCCAGAAGAAACGTAAA	NM_003587.x-488s1c1	CDS	NM_003587	8449	DHX16	DEAH (Asp-Glu-Ala-His) box polypeptide 16
TRCN0000001127	TRPS0000033508	TACAATAATGAAGGCAATGCA	NM_004396.x-2264s1c1	3UTR	NM_004396	1655	DDX5	DEAD (Asp-Glu-Ala-Asp) box polypeptide 5
TRCN0000001128	TRPS0000012706	AGGTGGAAACATACAGAAGAA	NM_004396.x-385s1c1	CDS	NM_004396	1655	DDX5	DEAD (Asp-Glu-Ala-Asp) box polypeptide 5
TRCN0000001129	TRPS0000146212	CTTATCTCTGTGCTTCGTGAA	NM_004396.x-1536s1c1	CDS	NM_004396	1655	DDX5	DEAD (Asp-Glu-Ala-Asp) box polypeptide 5
TRCN0000001130	TRPS0000271888	GCTCCTATTCTGATTGCTACA	NM_004396.x-1344s1c1	CDS	NM_004396	1655	DDX5	DEAD (Asp-Glu-Ala-Asp) box polypeptide 5
TRCN0000001131	TRPS0000032066	TCCACATCAATCATCAGCCAT	NM_004396.x-631s1c1	CDS	NM_004396	1655	DDX5	DEAD (Asp-Glu-Ala-Asp) box polypeptide 5
TRCN0000001132	TRPS0000112282	CGGACTATGTAATTGTAACTA	NM_004960.x-1768s1c1	3UTR	NM_004960	2521	FUS	fusion (involved in t(12;16) in malignant liposarcoma)
TRCN0000001133	TRPS0000353433	GCCTGGGTGAGAATGTTACAA	NM_004960.x-950s1c1	CDS	NM_004960	2521	FUS	fusion (involved in t(12;16) in malignant liposarcoma)
TRCN0000001134	TRPS0000235798	CGTGGTGGCTTCAATAAATTT	NM_004960.x-853s1c1	CDS	NM_004960	2521	FUS	fusion (involved in t(12;16) in malignant liposarcoma)
TRCN0000001135	TRPS0000017695	ACAGGATAATTCAGACAACAA	NM_004960.x-912s1c1	CDS	NM_004960	2521	FUS	fusion (involved in t(12;16) in malignant liposarcoma)
TRCN0000001136	TRPS0000275291	GCTTCTACTCAACCTACTCAT	NM_005871.x-385s1c1	CDS	NM_005871	10285	SMNDC1	survival motor neuron domain containing 1
TRCN0000001137	TRPS0000215825	CAGTGTTATGAAGCGGAGATT	NM_005871.x-454s1c1	CDS	NM_005871	10285	SMNDC1	survival motor neuron domain containing 1
TRCN0000001138	TRPS0000048191	CTGGTAAAGTTGGAGTAGGAA	NM_005871.x-809s1c1	CDS	NM_005871	10285	SMNDC1	survival motor neuron domain containing 1
TRCN0000001139	TRPS0000359873	GAAGCGGAGATTGAGGAGATA	NM_005871.x-463s1c1	CDS	NM_005871	10285	SMNDC1	survival motor neuron domain containing 1
TRCN0000001140	TRPS0000221193	CGCTAGTATGTTGGAAGTTAT	NM_006276.x-2572s1c1	3UTR	NM_006276	6432	SFRS7	splicing factor, arginine/serine-rich 7, 35kDa
TRCN0000001141	TRPS0000288194	GATGCTATGAGTGTGGCGAAA	NM_006276.x-367s1c1	CDS	NM_006276	6432	SFRS7	splicing factor, arginine/serine-rich 7, 35kDa
TRCN0000001142	TRPS0000361719	GAACTGTATGGATTGCGAGAA	NM_006276.x-166s1c1	CDS	NM_006276	6432	SFRS7	splicing factor, arginine/serine-rich 7, 35kDa
TRCN0000001143	TRPS0000013928	AGGACTGGATGGAAAGGTGAT	NM_006276.x-248s1c1	CDS	NM_006276	6432	SFRS7	splicing factor, arginine/serine-rich 7, 35kDa
TRCN0000001144	TRPS0000000906	AGCAGGTTTCTTCGTTTGAGT	NM_006276.x-435s1c1	CDS	NM_006276	6432	SFRS7	splicing factor, arginine/serine-rich 7, 35kDa
TRCN0000001145	TRPS0000152682	CCAAGATAGATGCAGCTGATA	NM_006425.x-1862s1c1	3UTR	NM_006425	10569	SLU7	SLU7 splicing factor homolog (S. cerevisiae)
TRCN0000001146	TRPS0000231104	CGAACATTGAAAGCCCAGAAA	NM_006425.x-658s1c1	CDS	NM_006425	10569	SLU7	SLU7 splicing factor homolog (S. cerevisiae)
TRCN0000001147	TRPS0000131896	CACAGGAGATACCATTTCAAT	NM_006425.x-1032s1c1	CDS	NM_006425	10569	SLU7	SLU7 splicing factor homolog (S. cerevisiae)
TRCN0000001148	TRPS0000201967	CAGAAGTTGATGAAGAAGGAA	NM_006425.x-230s1c1	CDS	NM_006425	10569	SLU7	SLU7 splicing factor homolog (S. cerevisiae)
TRCN0000001149	TRPS0000347858	GATCCAAATTCTGCCTACTAT	NM_006425.x-916s1c1	CDS	NM_006425	10569	SLU7	SLU7 splicing factor homolog (S. cerevisiae)
TRCN0000001150	TRPS0000251211	GATTTGGAAGAGGCGAGATAA	NM_006590.x-1651s1c1	3UTR	NM_006590	10713	USP39	ubiquitin specific peptidase 39
TRCN0000001151	TRPS0000131691	CCTTCCAGACAACTATGAGAT	NM_006590.x-530s1c1	CDS	NM_006590	10713	USP39	ubiquitin specific peptidase 39
TRCN0000001152	TRPS0000125842	CTGAATAACATAAAGGCCAAT	NM_006590.x-688s1c1	CDS	NM_006590	10713	USP39	ubiquitin specific peptidase 39
TRCN0000001153	TRPS0000292517	GTTGCCTCCATATCTAATCTT	NM_006590.x-1344s1c1	CDS	NM_006590	10713	USP39	ubiquitin specific peptidase 39
TRCN0000001154	TRPS0000285442	GCCGGGTATTGTGGGACTGAA	NM_006590.x-672s1c1	CDS	NM_006590	10713	USP39	ubiquitin specific peptidase 39
TRCN0000001155	TRPS0000264634	GAAAGTGTTGTAGTTGATTGA	NM_006758.x-791s1c1	3UTR	NM_006758	7307	U2AF1	U2 small nuclear RNA auxiliary factor 1
TRCN0000001156	TRPS0000174328	CCGACGTTTAGCCAGACCATT	NM_006758.x-156s1c1	CDS	NM_006758	7307	U2AF1	U2 small nuclear RNA auxiliary factor 1
TRCN0000001157	TRPS0000080647	CGTCGCAAGAAGCATAGATCA	NM_006758.x-603s1c1	CDS	NM_006758	7307	U2AF1	U2 small nuclear RNA auxiliary factor 1
TRCN0000001158	TRPS0000370642	GAGATGCAGGAACACTATGAT	NM_006758.x-255s1c1	CDS	NM_006758	7307	U2AF1	U2 small nuclear RNA auxiliary factor 1
TRCN0000001159	TRPS0000273600	GTTGGTTTAATGGACAGCCGA	NM_006758.x-436s1c1	CDS	NM_006758	7307	U2AF1	U2 small nuclear RNA auxiliary factor 1
TRCN0000001160	TRPS0000258154	GAAGACGATGGGCAGAGGAGT	NM_007279.x-1545s1c1	3UTR	NM_007279	11338	U2AF2	U2 small nuclear RNA auxiliary factor 2
TRCN0000001161	TRPS0000247741	GAAGAAGAAGAAGGTCCGTAA	NM_007279.x-289s1c1	CDS	NM_007279	11338	U2AF2	U2 small nuclear RNA auxiliary factor 2
TRCN0000001162	TRPS0000109905	CGACGAGGAGTATGAGGAGAT	NM_007279.x-1213s1c1	CDS	NM_007279	11338	U2AF2	U2 small nuclear RNA auxiliary factor 2
TRCN0000001163	TRPS0000038484	TGCAGATTAACCAGGACAAGA	NM_007279.x-606s1c1	CDS	NM_007279	11338	U2AF2	U2 small nuclear RNA auxiliary factor 2
TRCN0000001164	TRPS0000100784	CGCCTTCTGTGAGTACGTGGA	NM_007279.x-946s1c1	CDS	NM_007279	11338	U2AF2	U2 small nuclear RNA auxiliary factor 2
TRCN0000001165	TRPS0000380666	GCAGAGTATGACGATGGTATT	NM_013261.x-4291s1c1	3UTR	NM_013261	10891	PPARGC1A	peroxisome proliferator-activated receptor gamma, coactivator 1 alpha
TRCN0000001166	TRPS0000233718	CCGTTATACCTGTGATGCTTT	NM_013261.x-2286s1c1	CDS	NM_013261	10891	PPARGC1A	peroxisome proliferator-activated receptor gamma, coactivator 1 alpha
TRCN0000001167	TRPS0000158099	CCTCCTCATAAAGCCAACCAA	NM_013261.x-1018s1c1	CDS	NM_013261	10891	PPARGC1A	peroxisome proliferator-activated receptor gamma, coactivator 1 alpha
TRCN0000001168	TRPS0000109954	CGACTTGGATACAGACAGCTT	NM_013261.x-252s1c1	CDS	NM_013261	10891	PPARGC1A	peroxisome proliferator-activated receptor gamma, coactivator 1 alpha
TRCN0000001169	TRPS0000368143	GACAGCGAAGATGAAAGTGAT	NM_013261.x-1657s1c1	CDS	NM_013261	10891	PPARGC1A	peroxisome proliferator-activated receptor gamma, coactivator 1 alpha
TRCN0000001170	TRPS0000341542	GAGGACTTTCATCTGTGCATA	NM_014003.x-3913s1c1	3UTR	NM_014003	9785	DHX38	DEAH (Asp-Glu-Ala-His) box polypeptide 38
TRCN0000001171	TRPS0000282435	GCAGTGGAAGAACAATAATTA	NM_014003.x-3184s1c1	CDS	NM_014003	9785	DHX38	DEAH (Asp-Glu-Ala-His) box polypeptide 38
TRCN0000001172	TRPS0000270538	GAAGATGGTTACACGGACTAT	NM_014003.x-1847s1c1	CDS	NM_014003	9785	DHX38	DEAH (Asp-Glu-Ala-His) box polypeptide 38
TRCN0000001173	TRPS0000249427	GTCAGGTTGGTGGTCTTATTT	NM_014003.x-195s1c1	CDS	NM_014003	9785	DHX38	DEAH (Asp-Glu-Ala-His) box polypeptide 38
TRCN0000001174	TRPS0000208873	CAGAGACAACAGCATCGTGAT	NM_014003.x-1771s1c1	CDS	NM_014003	9785	DHX38	DEAH (Asp-Glu-Ala-His) box polypeptide 38
TRCN0000001175	TRPS0000051976	CCTGTGCTGGTCTATGATGTA	NM_014829.x-3266s1c1	3UTR	NM_014829	9879	DDX46	DEAD (Asp-Glu-Ala-Asp) box polypeptide 46
TRCN0000001176	TRPS0000187611	CCCATCCAAACCCAAGCTATT	NM_014829.x-1333s1c1	CDS	NM_014829	9879	DDX46	DEAD (Asp-Glu-Ala-Asp) box polypeptide 46
TRCN0000001177	TRPS0000380450	GCAGAAATCACCAGGCTCATA	NM_014829.x-3154s1c1	CDS	NM_014829	9879	DDX46	DEAD (Asp-Glu-Ala-Asp) box polypeptide 46
TRCN0000001178	TRPS0000362966	GTGATTGTGATTGAAGAAGAA	NM_014829.x-1933s1c1	CDS	NM_014829	9879	DDX46	DEAD (Asp-Glu-Ala-Asp) box polypeptide 46
TRCN0000001179	TRPS0000312646	GAAGAAGTGAAAGAGGAAGTA	NM_014829.x-841s1c1	CDS	NM_014829	9879	DDX46	DEAD (Asp-Glu-Ala-Asp) box polypeptide 46
TRCN0000001180	TRPS0000011847	ACCGAGATCACCGCCCAGTAT	NM_015629.x-1705s1c1	3UTR	NM_015629	26121	PRPF31	PRP31 pre-mRNA processing factor 31 homolog (S. cerevisiae)
TRCN0000001181	TRPS0000030097	TGATGAAGATTGAGGAGTATA	NM_015629.x-226s1c1	CDS	NM_015629	26121	PRPF31	PRP31 pre-mRNA processing factor 31 homolog (S. cerevisiae)
TRCN0000001182	TRPS0000179544	CAAGTGCAAGAACAATGAGAA	NM_015629.x-476s1c1	CDS	NM_015629	26121	PRPF31	PRP31 pre-mRNA processing factor 31 homolog (S. cerevisiae)
TRCN0000001183	TRPS0000236546	CTACGAACTGAAGGATGAGAT	NM_015629.x-986s1c1	CDS	NM_015629	26121	PRPF31	PRP31 pre-mRNA processing factor 31 homolog (S. cerevisiae)
TRCN0000001184	TRPS0000302963	GCACCCAACCTGTCCATCATT	NM_015629.x-681s1c1	CDS	NM_015629	26121	PRPF31	PRP31 pre-mRNA processing factor 31 homolog (S. cerevisiae)
TRCN0000001185	TRPS0000329810	GAACATTTATTGGTCACAGTA	NM_015891.x-1001s1c1	CDS	NM_015891	51362	CDC40	cell division cycle 40 homolog (S. cerevisiae)
TRCN0000001186	TRPS0000313774	GAAGATTTGGAGACTGGAGTT	NM_015891.x-214s1c1	CDS	NM_015891	51362	CDC40	cell division cycle 40 homolog (S. cerevisiae)
TRCN0000001187	TRPS0000002323	AGCACAGAACAGATTTAGATT	NM_015891.x-1491s1c1	CDS	NM_015891	51362	CDC40	cell division cycle 40 homolog (S. cerevisiae)
TRCN0000001188	TRPS0000122152	CCTAAGAGTTTGGGAATGGGA	NM_015891.x-1347s1c1	CDS	NM_015891	51362	CDC40	cell division cycle 40 homolog (S. cerevisiae)
TRCN0000001189	TRPS0000348887	GACCATGTTTGCTCCTGAGTT	NM_015891.x-282s1c1	CDS	NM_015891	51362	CDC40	cell division cycle 40 homolog (S. cerevisiae)
TRCN0000001190	TRPS0000357146	GCTGTGGGCATTTCCTCTATT	NM_016019.x-2046s1c1	3UTR	NM_016019	51631	LUC7L2	LUC7-like 2 (S. cerevisiae)
TRCN0000001191	TRPS0000223784	CGGTCCTATGAGAGTGCTAAT	NM_016019.x-1105s1c1	CDS	NM_016019	51631	LUC7L2	LUC7-like 2 (S. cerevisiae)
TRCN0000001192	TRPS0000274347	GCAGAGGAAGTTTATCGGAAT	NM_016019.x-505s1c1	CDS	NM_016019	51631	LUC7L2	LUC7-like 2 (S. cerevisiae)
TRCN0000001193	TRPS0000290209	GTAATGGATGAAGTAGAGAAA	NM_016019.x-463s1c1	CDS	NM_016019	51631	LUC7L2	LUC7-like 2 (S. cerevisiae)
TRCN0000001194	TRPS0000372320	GAACGGCTGAAACGAAGAGAA	NM_016019.x-724s1c1	CDS	NM_016019	51631	LUC7L2	LUC7-like 2 (S. cerevisiae)
TRCN0000001195	TRPS0000113348	CGTAGTGTCATGTTCTGTGCA	NM_018032.x-1411s1c1	3UTR	NM_018032	55692	LUC7L	LUC7-like (S. cerevisiae)
TRCN0000001196	TRPS0000202063	CCGAAGTGCGAAATACAAGTA	NM_018032.x-1045s1c1	CDS	NM_018032	55692	LUC7L	LUC7-like (S. cerevisiae)
TRCN0000001197	TRPS0000263970	GAGGAAATCAGTGCGGAAGTT	NM_018032.x-425s1c1	CDS	NM_018032	55692	LUC7L	LUC7-like (S. cerevisiae)
TRCN0000001198	TRPS0000264761	GCTGAATGTGATCGGAGAACT	NM_018032.x-371s1c1	CDS	NM_018032	55692	LUC7L	LUC7-like (S. cerevisiae)
TRCN0000001199	TRPS0000200514	CAGATTATGAGATTGCAAGTA	NM_018032.x-294s1c1	CDS	NM_018032	55692	LUC7L	LUC7-like (S. cerevisiae)
TRCN0000001200	TRPS0000013497	AGGCGTAAAGACAGACATGAA	NM_032905.x-1056s1c1	CDS	NM_032905	84991	RBM17	RNA binding motif protein 17
TRCN0000001201	TRPS0000245732	GATGAAGCAGTACGGATATTT	NM_032905.x-1695s1c1	CDS	NM_032905	84991	RBM17	RNA binding motif protein 17
TRCN0000001202	TRPS0000334292	GAGAAAGTAGTGAAGCGCCAA	NM_032905.x-972s1c1	CDS	NM_032905	84991	RBM17	RNA binding motif protein 17
TRCN0000001203	TRPS0000017347	AGATGAAGATTATGAGCGAGA	NM_032905.x-1118s1c1	CDS	NM_032905	84991	RBM17	RNA binding motif protein 17
TRCN0000001204	TRPS0000220580	CCTGCATCTTTATCTCTTCAT	NM_144723.x-914s1c1	3UTR	NM_144723	153527	ZMAT2	zinc finger, matrin type 2
TRCN0000001205	TRPS0000313200	GTCAACAAGAAGAAGATGGAA	NM_144723.x-396s1c1	CDS	NM_144723	153527	ZMAT2	zinc finger, matrin type 2
TRCN0000001206	TRPS0000280523	GAGAAGCAGAAGGATTATGAT	NM_144723.x-417s1c1	CDS	NM_144723	153527	ZMAT2	zinc finger, matrin type 2
TRCN0000001207	TRPS0000063084	CGTACAAGAAAGAGAAACAGA	NM_144723.x-487s1c1	CDS	NM_144723	153527	ZMAT2	zinc finger, matrin type 2
TRCN0000001208	TRPS0000292653	GGCTTTCGTTTAATACAATAG	NM_001357.x-4160s1c1	3UTR	NM_001357	1660	DHX9	DEAH (Asp-Glu-Ala-His) box polypeptide 9
TRCN0000001209	TRPS0000093279	CCAGAAGAATCAGTGCGGTTT	NM_001357.x-1414s1c1	CDS	NM_001357	1660	DHX9	DEAH (Asp-Glu-Ala-His) box polypeptide 9
TRCN0000001210	TRPS0000249301	GAAGGATTACTACTCAAGAAA	NM_001357.x-515s1c1	CDS	NM_001357	1660	DHX9	DEAH (Asp-Glu-Ala-His) box polypeptide 9
TRCN0000001211	TRPS0000007518	AGACTTAATATGGCTACACTA	NM_001357.x-2907s1c1	CDS	NM_001357	1660	DHX9	DEAH (Asp-Glu-Ala-His) box polypeptide 9
TRCN0000001212	TRPS0000037596	TCGAGGAATCAGTCATGTAAT	NM_001357.x-1586s1c1	CDS	NM_001357	1660	DHX9	DEAH (Asp-Glu-Ala-His) box polypeptide 9
TRCN0000001213	TRPS0000253435	GTACACTTTCAATCAACACTT	NM_002707.x-2103s1c1	3UTR	NM_002707	5496	PPM1G	protein phosphatase 1G (formerly 2C), magnesium-dependent, gamma isoform
TRCN0000001214	TRPS0000119788	CCAGAGGATGAAGTAGAACTA	NM_002707.x-1209s1c1	CDS	NM_002707	5496	PPM1G	protein phosphatase 1G (formerly 2C), magnesium-dependent, gamma isoform
TRCN0000001215	TRPS0000250336	GCTTCGGTTATTGTCATCCAT	NM_002707.x-1511s1c1	CDS	NM_002707	5496	PPM1G	protein phosphatase 1G (formerly 2C), magnesium-dependent, gamma isoform
TRCN0000001216	TRPS0000323235	GAAGAGGCTACCATGACTATT	NM_002707.x-546s1c1	CDS	NM_002707	5496	PPM1G	protein phosphatase 1G (formerly 2C), magnesium-dependent, gamma isoform
TRCN0000001217	TRPS0000254759	GAAGTCATTAAAGAGCTGGCA	NM_002707.x-432s1c1	CDS	NM_002707	5496	PPM1G	protein phosphatase 1G (formerly 2C), magnesium-dependent, gamma isoform
TRCN0000001218	TRPS0000184854	CGCGTGATTGACCCTTTAACT	NM_002744.x-1806s1c1	3UTR	NM_002744	5590	PRKCZ	protein kinase C, zeta
TRCN0000001219	TRPS0000313882	GCCACAGATCACAGACGACTA	NM_002744.x-1608s1c1	CDS	NM_002744	5590	PRKCZ	protein kinase C, zeta
TRCN0000001220	TRPS0000145813	CTGGTGCGGTTGAAGAAGAAT	NM_002744.x-802s1c1	CDS	NM_002744	5590	PRKCZ	protein kinase C, zeta
TRCN0000001221	TRPS0000267813	GCCTCCAGTAGACGACAAGAA	NM_002744.x-576s1c1	CDS	NM_002744	5590	PRKCZ	protein kinase C, zeta
TRCN0000001222	TRPS0000135671	CCCGGACATGAACACAGAGGA	NM_002744.x-1371s1c1	CDS	NM_002744	5590	PRKCZ	protein kinase C, zeta
TRCN0000001223	TRPS0000139372	CACTGTTACCATTGTTCTTAT	NM_003017.x-1538s1c1	3UTR	NM_003017	6428	SFRS3	splicing factor, arginine/serine-rich 3
TRCN0000001224	TRPS0000203133	CGAGAGCTAGATGGAAGAACA	NM_003017.x-285s1c1	CDS	NM_003017	6428	SFRS3	splicing factor, arginine/serine-rich 3
TRCN0000001225	TRPS0000007482	ACAATGGCAACAAGACGGAAT	NM_003017.x-151s1c1	CDS	NM_003017	6428	SFRS3	splicing factor, arginine/serine-rich 3
TRCN0000001226	TRPS0000334291	GACGGAATTGGAACGGGCTTT	NM_003017.x-164s1c1	CDS	NM_003017	6428	SFRS3	splicing factor, arginine/serine-rich 3
TRCN0000001227	TRPS0000034071	TGGAACTGTCGAATGGTGAAA	NM_003017.x-328s1c1	CDS	NM_003017	6428	SFRS3	splicing factor, arginine/serine-rich 3
TRCN0000001228	TRPS0000140009	CCATAACTAAAGGATCAGGAT	NM_003137.x-2823s1c1	3UTR	NM_003137	6732	SRPK1	SFRS protein kinase 1
TRCN0000001229	TRPS0000137217	CCAGGCAGAATTACTAGAGAA	NM_003137.x-840s1c1	CDS	NM_003137	6732	SRPK1	SFRS protein kinase 1
TRCN0000001230	TRPS0000374966	GTGGCAATGAAAGTAGTTAAA	NM_003137.x-325s1c1	CDS	NM_003137	6732	SRPK1	SFRS protein kinase 1
TRCN0000001231	TRPS0000055306	CAGACCCTAATGATCCAAATA	NM_003137.x-410s1c1	CDS	NM_003137	6732	SRPK1	SFRS protein kinase 1
TRCN0000001232	TRPS0000268874	GAACAACACATTAGCCAACTT	NM_003137.x-1324s1c1	CDS	NM_003137	6732	SRPK1	SFRS protein kinase 1
TRCN0000001233	TRPS0000025164	TGGCACAGATTACTCAGCAAA	NM_004966.x-2191s1c1	3UTR	NM_004966	3185	HNRNPF	heterogeneous nuclear ribonucleoprotein F
TRCN0000001234	TRPS0000178123	CGAGAACGACATTTACAACTT	NM_004966.x-1226s1c1	CDS	NM_004966	3185	HNRNPF	heterogeneous nuclear ribonucleoprotein F
TRCN0000001235	TRPS0000351235	GAGGTACATTGGCATCGTGAA	NM_004966.x-974s1c1	CDS	NM_004966	3185	HNRNPF	heterogeneous nuclear ribonucleoprotein F
TRCN0000001236	TRPS0000323996	GAAGGCTCTAGGGAAACACAA	NM_004966.x-821s1c1	CDS	NM_004966	3185	HNRNPF	heterogeneous nuclear ribonucleoprotein F
TRCN0000001237	TRPS0000078513	CGCAGGTGTCCATTTCATCTA	NM_004966.x-443s1c1	CDS	NM_004966	3185	HNRNPF	heterogeneous nuclear ribonucleoprotein F
TRCN0000001238	TRPS0000198544	CTCTTGGACATTATTGGGCTT	NM_005826.x-2178s1c1	3UTR	NM_005826	10236	HNRNPR	heterogeneous nuclear ribonucleoprotein R
TRCN0000001239	TRPS0000190533	CCAAGGGATTTATATGAGGAT	NM_005826.x-607s1c1	CDS	NM_005826	10236	HNRNPR	heterogeneous nuclear ribonucleoprotein R
TRCN0000001240	TRPS0000335154	GAACACTACAAGACACTGATA	NM_005826.x-172s1c1	CDS	NM_005826	10236	HNRNPR	heterogeneous nuclear ribonucleoprotein R
TRCN0000001241	TRPS0000365757	GACGTTATTCTCTATCATCAA	NM_005826.x-913s1c1	CDS	NM_005826	10236	HNRNPR	heterogeneous nuclear ribonucleoprotein R
TRCN0000001242	TRPS0000295478	GTAGCTTATGTCGATCTTGAT	NM_005826.x-253s1c1	CDS	NM_005826	10236	HNRNPR	heterogeneous nuclear ribonucleoprotein R
TRCN0000001243	TRPS0000002706	AGAGCCTTCATTACAAACATA	NM_005968.x-444s1c1	CDS	NM_005968	4670	HNRNPM	heterogeneous nuclear ribonucleoprotein M
TRCN0000001244	TRPS0000010587	ACAAGCATAGTCTGAGCGGAA	NM_005968.x-628s1c1	CDS	NM_005968	4670	HNRNPM	heterogeneous nuclear ribonucleoprotein M
TRCN0000001245	TRPS0000246423	GAGAGGAGAGATCATTGCAAA	NM_005968.x-1373s1c1	CDS	NM_005968	4670	HNRNPM	heterogeneous nuclear ribonucleoprotein M
TRCN0000001246	TRPS0000198000	CTGTGCAAGCTATATCTATGT	NM_005968.x-1000s1c1	CDS	NM_005968	4670	HNRNPM	heterogeneous nuclear ribonucleoprotein M
TRCN0000001247	TRPS0000320367	GATGGCTACGACTGGTGGGAT	NM_005968.x-710s1c1	CDS	NM_005968	4670	HNRNPM	heterogeneous nuclear ribonucleoprotein M
TRCN0000001248	TRPS0000063484	CCCAATGTACCTATAAGAAAT	NM_006743.x-948s1c1	3UTR	NM_006743	5935	RBM3	RNA binding motif (RNP1, RRM) protein 3
TRCN0000001249	TRPS0000009357	AGTGGCAGGTATTATGACAGT	NM_006743.x-403s1c1	CDS	NM_006743	5935	RBM3	RNA binding motif (RNP1, RRM) protein 3
TRCN0000001250	TRPS0000022792	TGGTCGTCAGATCCGTGTGGA	NM_006743.x-282s1c1	CDS	NM_006743	5935	RBM3	RNA binding motif (RNP1, RRM) protein 3
TRCN0000001251	TRPS0000354190	GCAGGTATTATGACAGTCGAC	NM_006743.x-407s1c1	CDS	NM_006743	5935	RBM3	RNA binding motif (RNP1, RRM) protein 3
TRCN0000001252	TRPS0000031723	TCACCAACCCAGAGCATGCTT	NM_006743.x-224s1c1	CDS	NM_006743	5935	RBM3	RNA binding motif (RNP1, RRM) protein 3
TRCN0000001253	TRPS0000114720	CGGAATGTCAGTTAATGCTAT	NM_006756.x-242s1c1	CDS	NM_006756	6917	TCEA1	transcription elongation factor A (SII), 1
TRCN0000001254	TRPS0000010939	AGAAGAAAGAACCTGCAATTA	NM_006756.x-370s1c1	CDS	NM_006756	6917	TCEA1	transcription elongation factor A (SII), 1
TRCN0000001255	TRPS0000300340	GCGGTTGAAGTGTAGGGAGAT	NM_006756.x-524s1c1	CDS	NM_006756	6917	TCEA1	transcription elongation factor A (SII), 1
TRCN0000001256	TRPS0000006303	AGAATCGGAATGTCAGTTAAT	NM_006756.x-237s1c1	CDS	NM_006756	6917	TCEA1	transcription elongation factor A (SII), 1
TRCN0000001257	TRPS0000048951	CCTAGAATACCCTGATGAGAA	NM_007192.x-4315s1c1	3UTR	NM_007192	11198	SUPT16H	suppressor of Ty 16 homolog (S. cerevisiae)
TRCN0000001258	TRPS0000121241	CGCAAGTCTAATGTGTCCTAT	NM_007192.x-1855s1c1	CDS	NM_007192	11198	SUPT16H	suppressor of Ty 16 homolog (S. cerevisiae)
TRCN0000001259	TRPS0000162491	CGGGCAGCATTACTTACAGAA	NM_007192.x-1705s1c1	CDS	NM_007192	11198	SUPT16H	suppressor of Ty 16 homolog (S. cerevisiae)
TRCN0000001260	TRPS0000203263	CCTGCCATCACACTGCTAATA	NM_007192.x-640s1c1	CDS	NM_007192	11198	SUPT16H	suppressor of Ty 16 homolog (S. cerevisiae)
TRCN0000001261	TRPS0000091199	CCCTGTGATGGAGAAATGATT	NM_007192.x-2470s1c1	CDS	NM_007192	11198	SUPT16H	suppressor of Ty 16 homolog (S. cerevisiae)
TRCN0000001262	TRPS0000142313	CGTGTCAATTTCCCTCAGGTT	NM_012141.x-3415s1c1	3UTR	NM_012141	26512	INTS6	integrator complex subunit 6
TRCN0000001263	TRPS0000382120	GCCGTTCATATTCTGTGTGTT	NM_012141.x-1090s1c1	CDS	NM_012141	26512	INTS6	integrator complex subunit 6
TRCN0000001264	TRPS0000318483	GCCACGAAGGTTGCATACATT	NM_012141.x-2300s1c1	CDS	NM_012141	26512	INTS6	integrator complex subunit 6
TRCN0000001265	TRPS0000213027	CCTTACAATTATCCAGTCCTT	NM_012141.x-1623s1c1	CDS	NM_012141	26512	INTS6	integrator complex subunit 6
TRCN0000001266	TRPS0000127003	CCAGCATCTTCACTCAACAAA	NM_012141.x-2841s1c1	CDS	NM_012141	26512	INTS6	integrator complex subunit 6
TRCN0000001267	TRPS0000263968	GCCACTACCTTCATCAACAAA	NM_016222.x-1615s1c1	CDS	NM_016222	51428	DDX41	DEAD (Asp-Glu-Ala-Asp) box polypeptide 41
TRCN0000001268	TRPS0000291499	GAGGAGATTGAGAACTATGTA	NM_016222.x-1552s1c1	CDS	NM_016222	51428	DDX41	DEAD (Asp-Glu-Ala-Asp) box polypeptide 41
TRCN0000001269	TRPS0000084660	CCATCCAGCACGTCATCAATT	NM_016222.x-1520s1c1	CDS	NM_016222	51428	DDX41	DEAD (Asp-Glu-Ala-Asp) box polypeptide 41
TRCN0000001270	TRPS0000192362	CGCCACTACCTTCATCAACAA	NM_016222.x-1614s1c1	CDS	NM_016222	51428	DDX41	DEAD (Asp-Glu-Ala-Asp) box polypeptide 41
TRCN0000001271	TRPS0000001667	AGACCAGGAGGAACGGACTAA	NM_016222.x-1419s1c1	CDS	NM_016222	51428	DDX41	DEAD (Asp-Glu-Ala-Asp) box polypeptide 41
TRCN0000001272	TRPS0000365473	GATGGCAAGAAGAAGGGTGAT	NM_016732.x-956s1c1	CDS	NM_016732	22913	RALY	RNA binding protein, autoantigenic (hnRNP-associated with lethal yellow homolog (mouse))
TRCN0000001273	TRPS0000177237	CATATACAGTGGCTACATCTT	NM_016732.x-619s1c1	CDS	NM_016732	22913	RALY	RNA binding protein, autoantigenic (hnRNP-associated with lethal yellow homolog (mouse))
TRCN0000001274	TRPS0000111437	CGACTTCTACGACAGGCTCTT	NM_016732.x-661s1c1	CDS	NM_016732	22913	RALY	RNA binding protein, autoantigenic (hnRNP-associated with lethal yellow homolog (mouse))
TRCN0000001275	TRPS0000085603	CAGGACACAGACGCGGATGAT	NM_016732.x-1184s1c1	CDS	NM_016732	22913	RALY	RNA binding protein, autoantigenic (hnRNP-associated with lethal yellow homolog (mouse))
TRCN0000001276	TRPS0000100655	CTATGATTACTACCGGGACGA	NM_016732.x-643s1c1	CDS	NM_016732	22913	RALY	RNA binding protein, autoantigenic (hnRNP-associated with lethal yellow homolog (mouse))
TRCN0000001277	TRPS0000179350	CCCTTTAACGACATACGCATT	NM_018091.x-2101s1c1	3UTR	NM_018091	55140	ELP3	elongation protein 3 homolog (S. cerevisiae)
TRCN0000001278	TRPS0000259784	GCCAGATATGACCCTTTCCTA	NM_018091.x-424s1c1	CDS	NM_018091	55140	ELP3	elongation protein 3 homolog (S. cerevisiae)
TRCN0000001279	TRPS0000127030	CCTACAGACAAGACACCGAAT	NM_018091.x-441s1c1	CDS	NM_018091	55140	ELP3	elongation protein 3 homolog (S. cerevisiae)
TRCN0000001280	TRPS0000045090	CGTGGGACTAGAAAGAGACAT	NM_018091.x-879s1c1	CDS	NM_018091	55140	ELP3	elongation protein 3 homolog (S. cerevisiae)
TRCN0000001281	TRPS0000214660	CGATTACGCAAGTGTTCAGAA	NM_018091.x-1360s1c1	CDS	NM_018091	55140	ELP3	elongation protein 3 homolog (S. cerevisiae)
TRCN0000001282	TRPS0000058223	CAGAACTAGCACAGCAGAAAT	NM_019040.x-1869s1c1	3UTR	NM_019040	26610	ELP4	elongation protein 4 homolog (S. cerevisiae)
TRCN0000001283	TRPS0000331630	GCGTTACCAGTTATTACCCAA	NM_019040.x-493s1c1	CDS	NM_019040	26610	ELP4	elongation protein 4 homolog (S. cerevisiae)
TRCN0000001284	TRPS0000341266	GAGAGAAACTAACCCATTGTA	NM_019040.x-1009s1c1	CDS	NM_019040	26610	ELP4	elongation protein 4 homolog (S. cerevisiae)
TRCN0000001285	TRPS0000306350	GAGACAAGAGAGGAACATTTA	NM_019040.x-1460s1c1	CDS	NM_019040	26610	ELP4	elongation protein 4 homolog (S. cerevisiae)
TRCN0000001286	TRPS0000151447	CTCTATGTTCTCCGTGGTCTT	NM_019040.x-860s1c1	CDS	NM_019040	26610	ELP4	elongation protein 4 homolog (S. cerevisiae)
TRCN0000001287	TRPS0000111293	CGGCCTGTTCATTAGTCCTTT	NM_021931.x-2250s1c1	3UTR	NM_021931	60625	DHX35	DEAH (Asp-Glu-Ala-His) box polypeptide 35
TRCN0000001288	TRPS0000043414	CGCTGGGTCATCTATAACGAA	NM_021931.x-1962s1c1	CDS	NM_021931	60625	DHX35	DEAH (Asp-Glu-Ala-His) box polypeptide 35
TRCN0000001289	TRPS0000191546	CGAAGTTATACAGACCTCCAA	NM_021931.x-1979s1c1	CDS	NM_021931	60625	DHX35	DEAH (Asp-Glu-Ala-His) box polypeptide 35
TRCN0000001290	TRPS0000384957	GCGTAGTAATTTGGCACCTGT	NM_021931.x-1280s1c1	CDS	NM_021931	60625	DHX35	DEAH (Asp-Glu-Ala-His) box polypeptide 35
TRCN0000001291	TRPS0000254846	GTTTCATTCTACTGGAGCTTA	NM_021931.x-1871s1c1	CDS	NM_021931	60625	DHX35	DEAH (Asp-Glu-Ala-His) box polypeptide 35
TRCN0000001292	TRPS0000363090	GCGGCTAGTTCAGAGAGATTT	NM_031370.x-2119s1c1	3UTR	NM_031370	3184	HNRNPD	heterogeneous nuclear ribonucleoprotein D (AU-rich element RNA binding protein 1, 37kDa)
TRCN0000001293	TRPS0000011657	AGAGTGGTTATGGGAAGGTAT	NM_031370.x-1292s1c1	CDS	NM_031370	3184	HNRNPD	heterogeneous nuclear ribonucleoprotein D (AU-rich element RNA binding protein 1, 37kDa)
TRCN0000001294	TRPS0000015788	AGTAAGAACGAGGAGGATGAA	NM_031370.x-496s1c1	CDS	NM_031370	3184	HNRNPD	heterogeneous nuclear ribonucleoprotein D (AU-rich element RNA binding protein 1, 37kDa)
TRCN0000001295	TRPS0000010042	AGGATATGACTACACTGGTTA	NM_031370.x-1233s1c1	CDS	NM_031370	3184	HNRNPD	heterogeneous nuclear ribonucleoprotein D (AU-rich element RNA binding protein 1, 37kDa)
TRCN0000001296	TRPS0000023425	TCGAAGGAACAATATCAGCAA	NM_031370.x-1060s1c1	CDS	NM_031370	3184	HNRNPD	heterogeneous nuclear ribonucleoprotein D (AU-rich element RNA binding protein 1, 37kDa)
TRCN0000001297	TRPS0000067623	CGATAAGAGAATGTGTCAGTA	NM_031844.x-2910s1c1	3UTR	NM_031844	3192	HNRNPU	heterogeneous nuclear ribonucleoprotein U (scaffold attachment factor A)
TRCN0000001298	TRPS0000130076	CAGTGCTTCTTCCCTTACAAT	NM_031844.x-1132s1c1	CDS	NM_031844	3192	HNRNPU	heterogeneous nuclear ribonucleoprotein U (scaffold attachment factor A)
TRCN0000001299	TRPSC000278325	GCAACTGTGAGACTGAAGATT	NM_031844.x-1380s1c1	CDS	NM_031844	3192	HNRNPU	heterogeneous nuclear ribonucleoprotein U (scaffold attachment factor A)
TRCN0000001300	TRPSC000011557	AGGGAACTACAACCAGAACTT	NM_031844.x-2551s1c1	CDS	NM_031844	3192	HNRNPU	heterogeneous nuclear ribonucleoprotein U (scaffold attachment factor A)
TRCN0000001301	TRPS0000391021	GAACAAGTATAGCAGAGCCAA	NM_031844.x-1003s1c1	CDS	NM_031844	3192	HNRNPU	heterogeneous nuclear ribonucleoprotein U (scaffold attachment factor A)
TRCN0000001302	TRPS0000343447	GCAGTTCAAGTTCGAGGTCAA	NM_032361.x-606s1c1	CDS	NM_032361	84321	THOC3	THO complex 3
TRCN0000001303	TRPS0000355648	GTGATGACAAAGACGGCAAAT	NM_032361.x-1046s1c1	CDS	NM_032361	84321	THOC3	THO complex 3
TRCN0000001304	TRPS0000333757	GTGGATGAGTTAGTGTGTGTT	NM_032361.x-826s1c1	CDS	NM_032361	84321	THOC3	THO complex 3
TRCN0000001305	TRPS0000266024	GCATCCAAGTAATCCTGACCT	NM_032361.x-390s1c1	CDS	NM_032361	84321	THOC3	THO complex 3
TRCN0000001306	TRPS0000390472	GCCAAGACACACCGTTCCAAA	NM_032361.x-577s1c1	CDS	NM_032361	84321	THOC3	THO complex 3
TRCN0000001307	TRPS0000159773	CCATCATTCTTAGGCTCACTT	NM_139168.x-3184s1c1	3UTR	NM_139168	140890	SFRS12	splicing factor, arginine/serine-rich 12
TRCN0000001308	TRPS0000317326	GAAGAAGTAATGAAGCGAGTA	NM_139168.x-819s1c1	CDS	NM_139168	140890	SFRS12	splicing factor, arginine/serine-rich 12
TRCN0000001309	TRPS0000083773	CATGAGAAGGATCGAGACAAA	NM_139168.x-1314s1c1	CDS	NM_139168	140890	SFRS12	splicing factor, arginine/serine-rich 12
TRCN0000001310	TRPS0000390571	GATGAAATTAGGAGAACGGTT	NM_139168.x-525s1c1	CDS	NM_139168	140890	SFRS12	splicing factor, arginine/serine-rich 12
TRCN0000001311	TRPS0000232167	CTCCAACAATGCAATAGTAAA	NM_139168.x-758s1c1	CDS	NM_139168	140890	SFRS12	splicing factor, arginine/serine-rich 12
TRCN0000001312	TRPS0000193961	CGTGGGAGTTTACAGGATATT	NM_003995.x-1801s1c1	CDS	NM_003995	4882	NPR2	natriuretic peptide receptor B/guanylate cyclase B (atrionatriuretic peptide receptor B)
TRCN0000001313	TRPS0000332848	GCTCTGCTCTACCAAATCCTA	NM_003995.x-2494s1c1	CDS	NM_003995	4882	NPR2	natriuretic peptide receptor B/guanylate cyclase B (atrionatriuretic peptide receptor B)
TRCN0000001314	TRPS0000294622	GCCTTTCTCCACAACAGCATT	NM_003995.x-1894s1c1	CDS	NM_003995	4882	NPR2	natriuretic peptide receptor B/guanylate cyclase B (atrionatriuretic peptide receptor B)
TRCN0000001315	TRPS0000224232	CACTTCTTAATGACCTGTATA	NM_003995.x-2651s1c1	CDS	NM_003995	4882	NPR2	natriuretic peptide receptor B/guanylate cyclase B (atrionatriuretic peptide receptor B)
TRCN0000001316	TRPS0000143137	CCAGACCATCATCCTCACATA	NM_004027.x-1188s1c1	CDS	NM_004027	3631	INPP4A	inositol polyphosphate-4-phosphatase, type I, 107kDa
TRCN0000001317	TRPS0000236895	CTCTCCGTGTATGATGTCAAA	NM_004027.x-643s1c1	CDS	NM_004027	3631	INPP4A	inositol polyphosphate-4-phosphatase, type I, 107kDa
TRCN0000001318	TRPS0000095111	CTCTTCAACGTGGGCATCAAT	NM_004027.x-2569s1c1	CDS	NM_004027	3631	INPP4A	inositol polyphosphate-4-phosphatase, type I, 107kDa
TRCN0000001319	TRPS0000069111	CCGGAAGAATAAGAACGTCGA	NM_004027.x-2781s1c1	CDS	NM_004027	3631	INPP4A	inositol polyphosphate-4-phosphatase, type I, 107kDa
TRCN0000001320	TRPS0000254580	GATGAGTGACAAGGCCAAGAA	NM_004027.x-2106s1c1	CDS	NM_004027	3631	INPP4A	inositol polyphosphate-4-phosphatase, type I, 107kDa
TRCN0000001321	TRPS0000306995	GACAGGGAAATACTACGCCAT	NM_013355.x-1740s1c1	CDS	NM_013355	29941	PKN3	protein kinase N3
TRCN0000001322	TRPS0000221653	CATGTGGAGCTGAAGGTGAAA	NM_013355.x-343s1c1	CDS	NM_013355	29941	PKN3	protein kinase N3
TRCN0000001323	TRPS0000002936	ACACGAGAAGAAGATCATTTA	NM_013355.x-2025s1c1	CDS	NM_013355	29941	PKN3	protein kinase N3
TRCN0000001324	TRPS0000007280	ACCTTCTGCGATCCTGTCATT	NM_013355.x-1240s1c1	CDS	NM_013355	29941	PKN3	protein kinase N3
TRCN0000001325	TRPS0000233682	CCACCACCAAAGCCTCATAAA	NM_014677.x-1152s1c1	CDS	NM_014677	9699	RIMS2	regulating synaptic membrane exocytosis 2
TRCN0000001326	TRPS0000300877	GCTACCGAAGTGATCCGAATT	NM_014677.x-667s1c1	CDS	NM_014677	9699	RIMS2	regulating synaptic membrane exocytosis 2
TRCN0000001327	TRPS0000068520	CCAGGTGATGAAGTATTAGAA	NM_014677.x-1722s1c1	CDS	NM_014677	9699	RIMS2	regulating synaptic membrane exocytosis 2
TRCN0000001328	TRPS0000082139	CCACTGAACGTCCTGATACAA	NM_014677.x-2902s1c1	CDS	NM_014677	9699	RIMS2	regulating synaptic membrane exocytosis 2
TRCN0000001329	TRPS0000147206	CCACGCCTGAATATACAAGTT	NM_014677.x-1234s1c1	CDS	NM_014677	9699	RIMS2	regulating synaptic membrane exocytosis 2
TRCN0000001330	TRPS0000186378	CCGCAGATAAATGTAGAAATA	NM_014826.x-6823s1c1	3UTR	NM_014826	8476	CDC42BPA	CDC42 binding protein kinase alpha (DMPK-like)
TRCN0000001331	TRPS0000322378	GCGATTACATAGAGAAGACTT	NM_014826.x-1153s1c1	CDS	NM_014826	8476	CDC42BPA	CDC42 binding protein kinase alpha (DMPK-like)
TRCN0000001332	TRPS0000212879	CGCTCAGTCTATGTTCCCAAA	NM_014826.x-4292s1c1	CDS	NM_014826	8476	CDC42BPA	CDC42 binding protein kinase alpha (DMPK-like)
TRCN0000001333	TRPS0000245878	GCAAGAGATAACCAAACTAAA	NM_014826.x-2749s1c1	CDS	NM_014826	8476	CDC42BPA	CDC42 binding protein kinase alpha (DMPK-like)
TRCN0000001334	TRPS0000366762	GCTCAGTCAGTATTCCATCTA	NM_014826.x-5490s1c1	CDS	NM_014826	8476	CDC42BPA	CDC42 binding protein kinase alpha (DMPK-like)
TRCN0000001335	TRPS0000346879	GCTTAATACGTGTCGGTCATA	NM_015358.x-4012s1c1	3UTR	NM_015358	23515	MORC3	MORC family CW-type zinc finger 3
TRCN0000001336	TRPS0000092348	CCCGAGGATTTAGATGAGATA	NM_015358.x-721s1c1	CDS	NM_015358	23515	MORC3	MORC family CW-type zinc finger 3
TRCN0000001337	TRPS0000357838	GCCAATTACAAGAACTGAGAA	NM_015358.x-2138s1c1	CDS	NM_015358	23515	MORC3	MORC family CW-type zinc finger 3
TRCN0000001338	TRPS0000098475	CCTGTCTAAAGTGGCGGAAAT	NM_015358.x-1301s1c1	CDS	NM_015358	23515	MORC3	MORC family CW-type zinc finger 3
TRCN0000001339	TRPS0000302289	GTGAGGTTGAATTGCTGGAAA	NM_015358.x-2561s1c1	CDS	NM_015358	23515	MORC3	MORC family CW-type zinc finger 3
TRCN0000001340	TRPS0000104507	CGAACCAGACAAGCAGACAAT	NM_017721.x-3278s1c1	3UTR	NM_017721	54862	CC2D1A	coiled-coil and C2 domain containing 1A
TRCN0000001341	TRPS0000045413	CGCATCGTCAAGCAATACCAA	NM_017721.x-1490s1c1	CDS	NM_017721	54862	CC2D1A	coiled-coil and C2 domain containing 1A
TRCN0000001342	TRPS0000150560	CTGGATGTCTTTGTTCGGTTT	NM_017721.x-2384s1c1	CDS	NM_017721	54862	CC2D1A	coiled-coil and C2 domain containing 1A
TRCN0000001343	TRPS0000338664	GAGTTCAAGGAGCAGTTCAAA	NM_017721.x-2477s1c1	CDS	NM_017721	54862	CC2D1A	coiled-coil and C2 domain containing 1A
TRCN0000001344	TRPS0000045093	CCACTCAAACCAATTCACCCA	NM_017721.x-2128s1c1	CDS	NM_017721	54862	CC2D1A	coiled-coil and C2 domain containing 1A
TRCN0000001345	TRPS0000089691	CGAGCTGTTCTTCCTTCCTAT	NM_020526.x-4708s1c1	3UTR	NM_020526	2046	EPHA8	EPH receptor A8
TRCN0000001346	TRPS0000339178	GACGAGGAGAAGATGCACTAT	NM_020526.x-1844s1c1	CDS	NM_020526	2046	EPHA8	EPH receptor A8
TRCN0000001347	TRPS0000263443	GCGAAGTGAATTTGCTGGACA	NM_020526.x-201s1c1	CDS	NM_020526	2046	EPHA8	EPH receptor A8
TRCN0000001348	TRPS0000177590	CTATAAGAAGTGCCCTGCCAT	NM_020526.x-712s1c1	CDS	NM_020526	2046	EPHA8	EPH receptor A8
TRCN0000001349	TRPS0000215240	CAGATTGTCAGTGTCCTCGAT	NM_020526.x-2771s1c1	CDS	NM_020526	2046	EPHA8	EPH receptor A8
TRCN0000001350	TRPS0000367204	GTGTCCAGTGATAAATGTGAT	NM_020666.x-1698s1c1	3UTR	NM_020666	57396	CLK4	CDC-like kinase 4
TRCN0000001351	TRPS0000252697	GCATCCTTTCTTTGACTTATT	NM_020666.x-1413s1c1	CDS	NM_020666	57396	CLK4	CDC-like kinase 4
TRCN0000001352	TRPS0000049635	CTGGCAATGATGGAACGAATA	NM_020666.x-1156s1c1	CDS	NM_020666	57396	CLK4	CDC-like kinase 4
TRCN0000001353	TRPS0000160565	CGATGTGTCCAGATGCTAGAA	NM_020666.x-661s1c1	CDS	NM_020666	57396	CLK4	CDC-like kinase 4
TRCN0000001354	TRPS0000085383	CCCTAATGCTTTCGATGTGGT	NM_139034.x-312s1c1	CDS	NM_139034	5598	MAPK7	mitogen-activated protein kinase 7
TRCN0000001355	TRPS0000016516	AGACAATACTAAGGCTGCCCT	NM_139034.x-1470s1c1	CDS	NM_139034	5598	MAPK7	mitogen-activated protein kinase 7
TRCN0000001356	TRPS0000169076	CTTCGATGTGACCTTTGACGT	NM_139034.x-186s1c1	CDS	NM_139034	5598	MAPK7	mitogen-activated protein kinase 7
TRCN0000001357	TRPS0000149184	CAGTCGGAGGTGTAATCATAT	NM_152910.x-3539s1c1	3UTR	NM_152910	160851	DGKH	diacylglycerol kinase, eta
TRCN0000001358	TRPS0000149798	CCAGTAAATGTTCAGTCCTAA	NM_152910.x-1652s1c1	CDS	NM_152910	160851	DGKH	diacylglycerol kinase, eta
TRCN0000001359	TRPS0000234924	CCCTGAATAAAGCCAACCCAA	NM_152910.x-3110s1c1	CDS	NM_152910	160851	DGKH	diacylglycerol kinase, eta
TRCN0000001360	TRPS0000096770	CCGGACCAAGACCAGTATTAA	NM_152910.x-204s1c1	CDS	NM_152910	160851	DGKH	diacylglycerol kinase, eta
TRCN0000001361	TRPS0000134412	CCGTAGATGGATATTCAGAAA	NM_152910.x-2303s1c1	CDS	NM_152910	160851	DGKH	diacylglycerol kinase, eta
TRCN0000001362	TRPS0000378951	GAGAAATGTATGCCAAATGAT	NM_173354.x-4597s1c1	3UTR	NM_173354	150094	SIK1	salt-inducible kinase 1
TRCN0000001363	TRPS0000197281	CCATCCACACATCATAAAGCT	NM_173354.x-343s1c1	CDS	NM_173354	150094	SIK1	salt-inducible kinase 1
TRCN0000001364	TRPS0000148761	CATTTATTACCTCCTCCTTGA	NM_173354.x-1105s1c1	CDS	NM_173354	150094	SIK1	salt-inducible kinase 1
TRCN0000001365	TRPS0000199784	CATCCACACATCATAAAGCTT	NM_173354.x-344s1c1	CDS	NM_173354	150094	SIK1	salt-inducible kinase 1
TRCN0000001366	TRPS0000215739	CCATTTATTACCTCCTCCTTG	NM_173354.x-1104s1c1	CDS	NM_173354	150094	SIK1	salt-inducible kinase 1
TRCN0000001367	TRPS0000219196	CCTCGACAGCATCTACTTCAA	NM_002082.x-545s1c1	CDS	NM_002082	2870	GRK6	G protein-coupled receptor kinase 6
TRCN0000001368	TRPS0000052817	CAGCATCTACTTCAACCGTTT	NM_002082.x-551s1c1	CDS	NM_002082	2870	GRK6	G protein-coupled receptor kinase 6
TRCN0000001369	TRPS0000074896	CAGTAGGTTTGTAGTGAGCTT	NM_002082.x-788s1c1	CDS	NM_002082	2870	GRK6	G protein-coupled receptor kinase 6
TRCN0000001370	TRPS0000209294	CAGGAAGCCCAGATAATCAGA	NM_002730.x-1401s1c1	3UTR	NM_002730	5566	PRKACA	protein kinase, cAMP-dependent, catalytic, alpha
TRCN0000001371	TRPS0000017611	AGGTGGTGAAACTGAAACAGA	NM_002730.x-432s1c1	CDS	NM_002730	5566	PRKACA	protein kinase, cAMP-dependent, catalytic, alpha
TRCN0000001372	TRPS0000305925	GAAATCCGGGTCTCCATCAAT	NM_002730.x-1199s1c1	CDS	NM_002730	5566	PRKACA	protein kinase, cAMP-dependent, catalytic, alpha
TRCN0000001373	TRPS0000389954	GATCGAACACACCCTGAATGA	NM_002730.x-451s1c1	CDS	NM_002730	5566	PRKACA	protein kinase, cAMP-dependent, catalytic, alpha
TRCN0000001374	TRPS0000145124	CTCACACCACACGCCTTAAAT	NM_002747.x-3808s1c1	3UTR	NM_002747	5596	MAPK4	mitogen-activated protein kinase 4
TRCN0000001375	TRPS0000001843	ACTACACCAAAGCCATCGACA	NM_002747.x-1105s1c1	CDS	NM_002747	5596	MAPK4	mitogen-activated protein kinase 4
TRCN0000001376	TRPS0000341599	GAAGGTCGCTGTGAAGAAGAT	NM_002747.x-623s1c1	CDS	NM_002747	5596	MAPK4	mitogen-activated protein kinase 4
TRCN0000001377	TRPS0000011595	AGTGAACAGTGAAGCCATCGA	NM_002747.x-1331s1c1	CDS	NM_002747	5596	MAPK4	mitogen-activated protein kinase 4
TRCN0000001378	TRPS0000290139	GATCAGCATTACTCCCACAAG	NM_002747.x-1017s1c1	CDS	NM_002747	5596	MAPK4	mitogen-activated protein kinase 4
TRCN0000001379	TRPS0000027886	TCCTGGCTCATCTCTTTATTC	NM_002759.x-2288s1c1	3UTR	NM_002759	5610	EIF2AK2	eukaryotic translation initiation factor 2-alpha kinase 2
TRCN0000001380	TRPS0000364260	GCCGCTAAACTTGCATATCTT	NM_002759.x-904s1c1	CDS	NM_002759	5610	EIF2AK2	eukaryotic translation initiation factor 2-alpha kinase 2
TRCN0000001381	TRPS0000355539	GCTGTTGGGATGGATTTGATT	NM_002759.x-1409s1c1	CDS	NM_002759	5610	EIF2AK2	eukaryotic translation initiation factor 2-alpha kinase 2
TRCN0000001382	TRPS0000024946	TCGACCTAACACATCTGAAAT	NM_002759.x-2010s1c1	CDS	NM_002759	5610	EIF2AK2	eukaryotic translation initiation factor 2-alpha kinase 2
TRCN0000001383	TRPS0000016621	ACTTAATACATACCGTCAGAA	NM_002759.x-474s1c1	CDS	NM_002759	5610	EIF2AK2	eukaryotic translation initiation factor 2-alpha kinase 2
TRCN0000001384	TRPS0000014499	AGCGATTCACTGTATAAACTT	NM_002953.x-2576s1c1	3UTR	NM_002953	6195	RPS6KA1	ribosomal protein S6 kinase, 90kDa, polypeptide 1
TRCN0000001385	TRPS0000343001	GCTCTATCTCATTCTGGACTT	NM_002953.x-564s1c1	CDS	NM_002953	6195	RPS6KA1	ribosomal protein S6 kinase, 90kDa, polypeptide 1
TRCN0000001386	TRPS0000251880	GAAGGAGACCATGACACTGAT	NM_002953.x-957s1c1	CDS	NM_002953	6195	RPS6KA1	ribosomal protein S6 kinase, 90kDa, polypeptide 1
TRCN0000001387	TRPS0000003585	ACACAGTTTCAGAGACAGCCA	NM_002953.x-2081s1c1	CDS	NM_002953	6195	RPS6KA1	ribosomal protein S6 kinase, 90kDa, polypeptide 1
TRCN0000001388	TRPS0000391025	GACCATGACACTGATTCTGAA	NM_002953.x-963s1c1	CDS	NM_002953	6195	RPS6KA1	ribosomal protein S6 kinase, 90kDa, polypeptide 1
TRCN0000001389	TRPS0000195485	CCTGTGGTCTATTGTCGCTAT	NM_003010.x-2385s1c1	3UTR	NM_003010	6416	MAP2K4	mitogen-activated protein kinase kinase 4
TRCN0000001390	TRPS0000219103	CTTCTTATGGATTTGGATGTA	NM_003010.x-502s1c1	CDS	NM_003010	6416	MAP2K4	mitogen-activated protein kinase kinase 4
TRCN0000001391	TRPS0000257897	GATGTATGAAGAACGTGCCGT	NM_003010.x-1173s1c1	CDS	NM_003010	6416	MAP2K4	mitogen-activated protein kinase kinase 4
TRCN0000001392	TRPS0000007447	ACGAGGAGCTTATGGTTCTGT	NM_003010.x-396s1c1	CDS	NM_003010	6416	MAP2K4	mitogen-activated protein kinase kinase 4
TRCN0000001393	TRPS0000377133	GATATGATGTCCGCTCTGATG	NM_003010.x-917s1c1	CDS	NM_003010	6416	MAP2K4	mitogen-activated protein kinase kinase 4
TRCN0000001394	TRPS0000128451	CGGCCTAAGTAAAGAGTCTAT	NM_004586.x-636s1c1	CDS	NM_004586	6197	RPS6KA3	ribosomal protein S6 kinase, 90kDa, polypeptide 3
TRCN0000001395	TRPS0000133002	CATCCAAACATTATCACTCTA	NM_004586.x-1417s1c1	CDS	NM_004586	6197	RPS6KA3	ribosomal protein S6 kinase, 90kDa, polypeptide 3
TRCN0000001396	TRPS0000007196	ACTGCCACAATACCAACTAAA	NM_004586.x-2052s1c1	CDS	NM_004586	6197	RPS6KA3	ribosomal protein S6 kinase, 90kDa, polypeptide 3
TRCN0000001397	TRPS0000034915	TCAACGATAGACTGGAATAAA	NM_004586.x-982s1c1	CDS	NM_004586	6197	RPS6KA3	ribosomal protein S6 kinase, 90kDa, polypeptide 3
TRCN0000001398	TRPS0000024719	TCCTACTCTATACAATGCTTA	NM_004586.x-1817s1c1	CDS	NM_004586	6197	RPS6KA3	ribosomal protein S6 kinase, 90kDa, polypeptide 3
TRCN0000001399	TRPS0000159458	CCGTAGTAAGAAATGGATCAT	NM_004836.x-4333s1c1	3UTR	NM_004836	9451	EIF2AK3	eukaryotic translation initiation factor 2-alpha kinase 3
TRCN0000001400	TRPS0000311543	GCACACAGATTACAGTCAGAT	NM_004836.x-1777s1c1	CDS	NM_004836	9451	EIF2AK3	eukaryotic translation initiation factor 2-alpha kinase 3
TRCN0000001401	TRPS0000229954	CCTCAAGCCATCCAACATATT	NM_004836.x-3110s1c1	CDS	NM_004836	9451	EIF2AK3	eukaryotic translation initiation factor 2-alpha kinase 3
TRCN0000001402	TRPS0000265731	GCTTTGGAATCTGTCACTAAT	NM_004836.x-1536s1c1	CDS	NM_004836	9451	EIF2AK3	eukaryotic translation initiation factor 2-alpha kinase 3
TRCN0000001403	TRPS0000196898	CCTTGTGAGTACGTGATGGTT	NM_004836.x-3441s1c1	CDS	NM_004836	9451	EIF2AK3	eukaryotic translation initiation factor 2-alpha kinase 3
TRCN0000001404	TRPS0000101652	CCCTCGTGTTCTTGCTGATAT	NM_004841.x-1940s1c1	CDS	NM_004841	9462	RASAL2	RAS protein activator like 2
TRCN0000001405	TRPS0000333722	GCCTTCCACCTCTTCATAGTA	NM_004841.x-784s1c1	CDS	NM_004841	9462	RASAL2	RAS protein activator like 2
TRCN0000001406	TRPS0000081054	CCTACGCCAATACAACAGCAA	NM_004841.x-1980s1c1	CDS	NM_004841	9462	RASAL2	RAS protein activator like 2
TRCN0000001407	TRPS0000264581	GCTAAGATAAAGACTGTGGAA	NM_005235.x-5156s1c1	3UTR	NM_005235	2066	ERBB4	v-erb-a erythroblastic leukemia viral oncogene homolog 4 (avian)
TRCN0000001408	TRPS0000388830	GCCACCAAACATGACTGACTT	NM_005235.x-1254s1c1	CDS	NM_005235	2066	ERBB4	v-erb-a erythroblastic leukemia viral oncogene homolog 4 (avian)
TRCN0000001409	TRPS0000152906	CCCAAACAAGAATACCTGAAT	NM_005235.x-3505s1c1	CDS	NM_005235	2066	ERBB4	v-erb-a erythroblastic leukemia viral oncogene homolog 4 (avian)
TRCN0000001410	TRPS0000222226	CCTGTGGCTATTAAGATTCTT	NM_005235.x-2272s1c1	CDS	NM_005235	2066	ERBB4	v-erb-a erythroblastic leukemia viral oncogene homolog 4 (avian)
TRCN0000001411	TRPS0000280910	GCGCAGGAAACATCTATATTA	NM_005235.x-1394s1c1	CDS	NM_005235	2066	ERBB4	v-erb-a erythroblastic leukemia viral oncogene homolog 4 (avian)
TRCN0000001412	TRPS0000064758	CGGGAAACTGAATAATAAGAA	NM_005813.x-3393s1c1	3UTR	NM_005813	23683	PRKD3	protein kinase D3
TRCN0000001413	TRPS0000069852	CGAGTCTTTGTAGTAATGGAA	NM_005813.x-2494s1c1	CDS	NM_005813	23683	PRKD3	protein kinase D3
TRCN0000001414	TRPS0000226671	CGGGAGAGTGTTACCATTGAA	NM_005813.x-763s1c1	CDS	NM_005813	23683	PRKD3	protein kinase D3
TRCN0000001415	TRPS0000151630	CCAGGAACCAAGTAAGAGAAT	NM_005813.x-1284s1c1	CDS	NM_005813	23683	PRKD3	protein kinase D3
TRCN0000001416	TRPS0000078088	CAGGACTATCAGACTTGGCTT	NM_005813.x-3052s1c1	CDS	NM_005813	23683	PRKD3	protein kinase D3
TRCN0000001417	TRPS0000369770	GCCAACAAGAATGCCAGGAAT	NM_006182.x-2193s1c1	CDS	NM_006182	4921	DDR2	discoidin domain receptor tyrosine kinase 2
TRCN0000001418	TRPS0000324322	GCCAGATTTGTCCGGTTCATT	NM_006182.x-834s1c1	CDS	NM_006182	4921	DDR2	discoidin domain receptor tyrosine kinase 2
TRCN0000001419	TRPS0000353378	GCCAAGTGATTCTAGCATGTT	NM_006182.x-1694s1c1	CDS	NM_006182	4921	DDR2	discoidin domain receptor tyrosine kinase 2
TRCN0000001420	TRPS0000294477	GCTGACATAGTGAACCTCCAA	NM_006182.x-1923s1c1	CDS	NM_006182	4921	DDR2	discoidin domain receptor tyrosine kinase 2
TRCN0000001421	TRPS0000199701	CTCAGGTTAATCCAGCTATAT	NM_006182.x-421s1c1	CDS	NM_006182	4921	DDR2	discoidin domain receptor tyrosine kinase 2
TRCN0000001422	TRPS0000067539	CCCAACTTTCTTATCCAACTT	NM_006206.x-5736s1c1	3UTR	NM_006206	5156	PDGFRA	platelet-derived growth factor receptor, alpha polypeptide
TRCN0000001423	TRPS0000054961	CCAGCCTCATATAAGAAGAAA	NM_006206.x-2687s1c1	CDS	NM_006206	5156	PDGFRA	platelet-derived growth factor receptor, alpha polypeptide
TRCN0000001424	TRPS0000183822	CCAGCTTTCATTACCCTCTAT	NM_006206.x-463s1c1	CDS	NM_006206	5156	PDGFRA	platelet-derived growth factor receptor, alpha polypeptide
TRCN0000001425	TRPS0000195178	CGGTGAAAGACAGTGGAGATT	NM_006206.x-1236s1c1	CDS	NM_006206	5156	PDGFRA	platelet-derived growth factor receptor, alpha polypeptide
TRCN0000001426	TRPS0000120523	CAATGGACTTACCCTGGAGAA	NM_006206.x-1130s1c1	CDS	NM_006206	5156	PDGFRA	platelet-derived growth factor receptor, alpha polypeptide
TRCN0000001427	TRPS0000328625	GCACAATTAGATGACAAGTTT	NM_007064.x-4597s1c1	3UTR	NM_007064	11139	UNK	serine/threonine kinase with Dbl- and pleckstrin homology domains
TRCN0000001428	TRPS0000317686	GCAAAGATGTGGCTGTGAAAT	NM_007064.x-3146s1c1	CDS	NM_007064	11139	UNK	serine/threonine kinase with Dbl- and pleckstrin homology domains
TRCN0000001429	TRPS0000360157	GTGGAGTTAATGTGCCTTGTT	NM_007064.x-1297s1c1	CDS	NM_007064	11139	UNK	serine/threonine kinase with Dbl- and pleckstrin homology domains
TRCN0000001430	TRPS0000212991	CAAAGATTACTATGCACTGAA	NM_007064.x-2013s1c1	CDS	NM_007064	11139	UNK	serine/threonine kinase with Dbl- and pleckstrin homology domains
TRCN0000001431	TRPS0000048392	CAACGTATGCAGGGTGGATTT	NM_007064.x-3696s1c1	CDS	NM_007064	11139	UNK	serine/threonine kinase with Dbl- and pleckstrin homology domains
TRCN0000001432	TRPS0000316061	GCTAACCTATTCAAAGACCTT	NM_007170.x-2640s1c1	3UTR	NM_007170	10420	TESK2	testis-specific kinase 2
TRCN0000001433	TRPS0000207296	CCATCCCAACATCCTTAGGTA	NM_007170.x-722s1c1	CDS	NM_007170	10420	TESK2	testis-specific kinase 2
TRCN0000001434	TRPS0000090318	CCTCAGCTACCTTCACTTCAA	NM_007170.x-836s1c1	CDS	NM_007170	10420	TESK2	testis-specific kinase 2
TRCN0000001435	TRPS0000326337	GAGTTAAAGAGATCCCACCAT	NM_007170.x-1822s1c1	CDS	NM_007170	10420	TESK2	testis-specific kinase 2
TRCN0000001436	TRPS0000076894	CTGATAAAGAGGGATGAGAAT	NM_007170.x-894s1c1	CDS	NM_007170	10420	TESK2	testis-specific kinase 2
TRCN0000001437	TRPS0000107697	CCCTCTGCACTTTGTTTACTT	NM_013392.x-1901s1c1	3UTR	NM_013392	29959	NRBP1	nuclear receptor binding protein 1
TRCN0000001438	TRPS0000205587	CCAACACATGATCCCAGAGAA	NM_013392.x-1144s1c1	CDS	NM_013392	29959	NRBP1	nuclear receptor binding protein 1
TRCN0000001439	TRPS0000031897	TGTCGAGAAGAGCAGAAGAAT	NM_013392.x-809s1c1	CDS	NM_013392	29959	NRBP1	nuclear receptor binding protein 1
TRCN0000001440	TRPS0000002727	AGGCGAGAAGAGGTGAATCAA	NM_013392.x-311s1c1	CDS	NM_013392	29959	NRBP1	nuclear receptor binding protein 1
TRCN0000001441	TRPS0000179958	CATCTGGGAGTCTGAAGCAAT	NM_013392.x-573s1c1	CDS	NM_013392	29959	NRBP1	nuclear receptor binding protein 1
TRCN0000001442	TRPS0000089897	CTAGAGCATTGAGCACTTTAT	NM_016151.x-4493s1c1	3UTR	NM_016151	51677	UNK	prostate derived STE20-like kinase PSK
TRCN0000001443	TRPS0000226169	CCACCGCTCTTTAACATGAAT	NM_016151.x-1425s1c1	CDS	NM_016151	51677	UNK	prostate derived STE20-like kinase PSK
TRCN0000001444	TRPS0000329860	GCTTGGCTGGTAATGGAGTAT	NM_016151.x-1059s1c1	CDS	NM_016151	51677	UNK	prostate derived STE20-like kinase PSK
TRCN0000001445	TRPS0000146457	CACCTCTCACAGCTCCATTAT	NM_016151.x-1985s1c1	CDS	NM_016151	51677	UNK	prostate derived STE20-like kinase PSK
TRCN0000001446	TRPS0000016230	ACTCCCACAACATGATCCATA	NM_016151.x-1186s1c1	CDS	NM_016151	51677	UNK	prostate derived STE20-like kinase PSK
TRCN0000001447	TRPS0000015346	AGGCAGCTTTCATTTGTTTAA	NM_016524.x-1446s1c1	3UTR	NM_016524	51760	SYT17	synaptotagmin XVII
TRCN0000001448	TRPS0000293552	GCCAGACCAGAAGAACTCAAA	NM_016524.x-716s1c1	CDS	NM_016524	51760	SYT17	synaptotagmin XVII
TRCN0000001449	TRPS0000343035	GCTCTCCACTCATCGATATTA	NM_016524.x-361s1c1	CDS	NM_016524	51760	SYT17	synaptotagmin XVII
TRCN0000001450	TRPS0000121655	CCAAGTCTACATACAGCCTGA	NM_016524.x-304s1c1	CDS	NM_016524	51760	SYT17	synaptotagmin XVII
TRCN0000001451	TRPS0000051124	CTGGTGCATGGACTCAAACTT	NM_016524.x-1101s1c1	CDS	NM_016524	51760	SYT17	synaptotagmin XVII
TRCN0000001452	TRPS0000000600	ATATTCAACTCCTCTGCTCTT	NM_020439.x-1503s1c1	3UTR	NM_020439	57172	CAMK1G	calcium/calmodulin-dependent protein kinase IG
TRCN0000001453	TRPS0000198414	CCTCCAGATCCAGAAGAACTT	NM_020439.x-905s1c1	CDS	NM_020439	57172	CAMK1G	calcium/calmodulin-dependent protein kinase IG
TRCN0000001454	TRPS0000277766	GTGAAATACCTACATGAGAAT	NM_020439.x-420s1c1	CDS	NM_020439	57172	CAMK1G	calcium/calmodulin-dependent protein kinase IG
TRCN0000001455	TRPS0000302106	GACTTTATTTGCCACTTGCTT	NM_020439.x-783s1c1	CDS	NM_020439	57172	CAMK1G	calcium/calmodulin-dependent protein kinase IG
TRCN0000001456	TRPS0000364826	GAAGATCAAGGAGGGCTACTA	NM_020439.x-716s1c1	CDS	NM_020439	57172	CAMK1G	calcium/calmodulin-dependent protein kinase IG
TRCN0000001457	TRPS0000309673	GTAATGTAACTATCTCACCTA	NM_032552.x-4289s1c1	3UTR	NM_032552	153090	DAB2IP	DAB2 interacting protein
TRCN0000001458	TRPS0000261544	GACTCCAAACAGAAGATCATT	NM_032552.x-3099s1c1	CDS	NM_032552	153090	DAB2IP	DAB2 interacting protein
TRCN0000001459	TRPS0000272439	GAGTTCATCAAAGCGCTGTAT	NM_032552.x-1044s1c1	CDS	NM_032552	153090	DAB2IP	DAB2 interacting protein
TRCN0000001460	TRPS0000153344	CTGCAAGACTATCAACTCCTA	NM_032552.x-1163s1c1	CDS	NM_032552	153090	DAB2IP	DAB2 interacting protein
TRCN0000001461	TRPS0000266147	GCACATCACTAACCACTACCT	NM_032552.x-776s1c1	CDS	NM_032552	153090	DAB2IP	DAB2 interacting protein
TRCN0000001462	TRPS0000382130	GCCTATCAACTACCAGCCTTA	NM_138780.x-1145s1c1	CDS	NM_138780	94122	SYTL5	synaptotagmin-like 5
TRCN0000001463	TRPS0000136919	CACCAGAACAACTCCAAGGAA	NM_138780.x-1688s1c1	CDS	NM_138780	94122	SYTL5	synaptotagmin-like 5
TRCN0000001464	TRPS0000243193	GAGACTGAAGAAAGCATTGAT	NM_138780.x-1075s1c1	CDS	NM_138780	94122	SYTL5	synaptotagmin-like 5
TRCN0000001465	TRPS0000014710	AGTGTTCATCAAAGAGGCAAA	NM_138780.x-1770s1c1	CDS	NM_138780	94122	SYTL5	synaptotagmin-like 5
TRCN0000001466	TRPS0000001474	AGGACCAGTAACCAAGGAGAA	NM_145162.x-1154s1c1	3UTR	NM_145162	5607	MAP2K5	mitogen-activated protein kinase kinase 5
TRCN0000001467	TRPS0000244267	GCCCTCCAATATGCTAGTAAA	NM_145162.x-636s1c1	CDS	NM_145162	5607	MAP2K5	mitogen-activated protein kinase kinase 5
TRCN0000001468	TRPS0000061641	CCGTTCATCGTGCAGTTCAAT	NM_145162.x-1030s1c1	CDS	NM_145162	5607	MAP2K5	mitogen-activated protein kinase kinase 5
TRCN0000001469	TRPS0000181320	CCAATATGCTAGTAAACACAA	NM_145162.x-641s1c1	CDS	NM_145162	5607	MAP2K5	mitogen-activated protein kinase kinase 5
TRCN0000001470	TRPS0000129508	CTGATGTCTGGAGCTTAGGAA	NM_145162.x-791s1c1	CDS	NM_145162	5607	MAP2K5	mitogen-activated protein kinase kinase 5
TRCN0000001471	TRPS0000336257	GCAGTCCCATAGAACAGAAAT	NM_152720.x-1996s1c1	3UTR	NM_152720	4752	NEK3	NIMA (never in mitosis gene a)-related kinase 3
TRCN0000001472	TRPS0000146685	CCTTATTATGTGCCTCCAGAA	NM_152720.x-731s1c1	CDS	NM_152720	4752	NEK3	NIMA (never in mitosis gene a)-related kinase 3
TRCN0000001473	TRPS0000126221	CGAAGCATAACACACCAAGAA	NM_152720.x-1086s1c1	CDS	NM_152720	4752	NEK3	NIMA (never in mitosis gene a)-related kinase 3
TRCN0000001474	TRPS0000109673	CCAGTTCACCAAATCTTCATA	NM_152720.x-1293s1c1	CDS	NM_152720	4752	NEK3	NIMA (never in mitosis gene a)-related kinase 3
TRCN0000001475	TRPS0000062664	CCTAGTCAAGCAGATGTTTAA	NM_152720.x-931s1c1	CDS	NM_152720	4752	NEK3	NIMA (never in mitosis gene a)-related kinase 3
TRCN0000001476	TRPS0000259756	GCAGCAACATAGAGCAGTACA	NM_002613.x-1306s1c1	CDS	NM_002613	5170	PDPK1	3-phosphoinositide dependent protein kinase-1
TRCN0000001477	TRPS0000032420	TCACAGAAGGACCACATTTAT	NM_002613.x-1513s1c1	CDS	NM_002613	5170	PDPK1	3-phosphoinositide dependent protein kinase-1
TRCN0000001478	TRPS0000016146	AGTGGATAAGCGGAAGGGTTT	NM_002613.x-1466s1c1	CDS	NM_002613	5170	PDPK1	3-phosphoinositide dependent protein kinase-1
TRCN0000001479	TRPS0000109517	CGGAAGGGTTTATTTGCAAGA	NM_002613.x-1476s1c1	CDS	NM_002613	5170	PDPK1	3-phosphoinositide dependent protein kinase-1
TRCN0000001480	TRPS0000021267	TCGACCAGAGGCCAAGAATTT	NM_002613.x-1592s1c1	CDS	NM_002613	5170	PDPK1	3-phosphoinositide dependent protein kinase-1
TRCN0000001481	TRPS0000293019	GATGTGTGAGAAGCGGATATT	NM_002741.x-2064s1c1	CDS	NM_002741	5585	PKN1	protein kinase N1
TRCN0000001482	TRPS0000190761	CATGATCCAGACCTACAGCAA	NM_002741.x-525s1c1	CDS	NM_002741	5585	PKN1	protein kinase N1
TRCN0000001483	TRPS0000027356	TCAAAGCAGAAGCCGAGAACA	NM_002741.x-1226s1c1	CDS	NM_002741	5585	PKN1	protein kinase N1
TRCN0000001484	TRPS0000150516	CTGATGTGTGAGAAGCGGATA	NM_002741.x-2062s1c1	CDS	NM_002741	5585	PKN1	protein kinase N1
TRCN0000001485	TRPS0000013247	AGAACATGATCCAGACCTACA	NM_002741.x-521s1c1	CDS	NM_002741	5585	PKN1	protein kinase N1
TRCN0000001486	TRPS0000071668	CGTGAAGTACCCTGATAAGTT	NM_002929.x-1344s1c1	CDS	NM_002929	6011	GRK1	G protein-coupled receptor kinase 1
TRCN0000001487	TRPS0000174105	CTGGAAAGACATCGAGGACTA	NM_002929.x-372s1c1	CDS	NM_002929	6011	GRK1	G protein-coupled receptor kinase 1
TRCN0000001488	TRPS0000086198	CTACAACGTGAATGAGGAGAA	NM_002929.x-945s1c1	CDS	NM_002929	6011	GRK1	G protein-coupled receptor kinase 1
TRCN0000001489	TRPS0000276447	GACTATGACACGGCAGACAAT	NM_002929.x-388s1c1	CDS	NM_002929	6011	GRK1	G protein-coupled receptor kinase 1
TRCN0000001490	TRPS0000246223	GCAGCTTCACTCCATGTCATA	NM_004560.x-3357s1c1	3UTR	NM_004560	4920	ROR2	receptor tyrosine kinase-like orphan receptor 2
TRCN0000001491	TRPS0000044973	CCGCTACCATCAGTGCTATAA	NM_004560.x-1132s1c1	CDS	NM_004560	4920	ROR2	receptor tyrosine kinase-like orphan receptor 2
TRCN0000001492	TRPS0000146947	CGACAAGCTGAACGTGAAGAT	NM_004560.x-2071s1c1	CDS	NM_004560	4920	ROR2	receptor tyrosine kinase-like orphan receptor 2
TRCN0000001493	TRPS0000201243	CCTCATTAACCAGCACAAACA	NM_004560.x-1564s1c1	CDS	NM_004560	4920	ROR2	receptor tyrosine kinase-like orphan receptor 2
TRCN0000001494	TRPS0000004222	ACCTATGACTTGTTTGGAAAT	NM_004755.x-3685s1c1	3UTR	NM_004755	9252	RPS6KA5	ribosomal protein S6 kinase, 90kDa, polypeptide 5
TRCN0000001495	TRPS0000258794	GCACCATTTAAGCCAGTCATT	NM_004755.x-1212s1c1	CDS	NM_004755	9252	RPS6KA5	ribosomal protein S6 kinase, 90kDa, polypeptide 5
TRCN0000001496	TRPS0000360321	GCAGATTTATGTTGGAGAGAT	NM_004755.x-677s1c1	CDS	NM_004755	9252	RPS6KA5	ribosomal protein S6 kinase, 90kDa, polypeptide 5
TRCN0000001497	TRPS0000337340	GCTGAGAAGGTGGGAATAGAA	NM_004755.x-336s1c1	CDS	NM_004755	9252	RPS6KA5	ribosomal protein S6 kinase, 90kDa, polypeptide 5
TRCN0000001498	TRPS0000185595	CGCGGTGGAAATCATGAAGAA	NM_004755.x-2114s1c1	CDS	NM_004755	9252	RPS6KA5	ribosomal protein S6 kinase, 90kDa, polypeptide 5
TRCN0000001499	TRPS0000161397	CCAGCTCTACTACCTACGTTT	NM_005157.x-3910s1c1	3UTR	NM_005157	25	ABL1	c-abl oncogene 1, receptor tyrosine kinase
TRCN0000001500	TRPS0000380433	GAAAGAGATCAAACACCCTAA	NM_005157.x-1234s1c1	CDS	NM_005157	25	ABL1	c-abl oncogene 1, receptor tyrosine kinase
TRCN0000001501	TRPS0000229968	CCCGTTCTATATCATCACTGA	NM_005157.x-1291s1c1	CDS	NM_005157	25	ABL1	c-abl oncogene 1, receptor tyrosine kinase
TRCN0000001502	TRPS0000059157	CCTTCATCCCTCTCATATCAA	NM_005157.x-3369s1c1	CDS	NM_005157	25	ABL1	c-abl oncogene 1, receptor tyrosine kinase
TRCN0000001503	TRPS0000150373	CGACACGTTCACCCATCTTAT	NM_006226.x-3211s1c1	3UTR	NM_006226	5334	PLCL1	phospholipase C-like 1
TRCN0000001504	TRPS0000118597	CCAGCCATTATCTCACTACTA	NM_006226.x-1112s1c1	CDS	NM_006226	5334	PLCL1	phospholipase C-like 1
TRCN0000001505	TRPS0000270213	GCTCAGGAATATCGGTCTTAA	NM_006226.x-2531s1c1	CDS	NM_006226	5334	PLCL1	phospholipase C-like 1
TRCN0000001506	TRPS0000088999	CGAAGTGTCATAGAGGTAATA	NM_006226.x-1314s1c1	CDS	NM_006226	5334	PLCL1	phospholipase C-like 1
TRCN0000001507	TRPS0000184891	CCAATCATATCCTTCTCGTTT	NM_006259.x-2619s1c1	3UTR	NM_006259	5593	PRKG2	protein kinase, cGMP-dependent, type II
TRCN0000001508	TRPS0000354871	GCCTGGTTATAGATCGAGAAA	NM_006259.x-1150s1c1	CDS	NM_006259	5593	PRKG2	protein kinase, cGMP-dependent, type II
TRCN0000001509	TRPS0000109846	CCCAAGCTAGAGATGAACAAT	NM_006259.x-823s1c1	CDS	NM_006259	5593	PRKG2	protein kinase, cGMP-dependent, type II
TRCN0000001510	TRPS0000321544	GCAAACCTGAACCGTGATGAT	NM_006259.x-1230s1c1	CDS	NM_006259	5593	PRKG2	protein kinase, cGMP-dependent, type II
TRCN0000001511	TRPS0000276266	GACCAAATGATGACCTACAAT	NM_006259.x-1974s1c1	CDS	NM_006259	5593	PRKG2	protein kinase, cGMP-dependent, type II
TRCN0000001512	TRPS0000359222	GTTTGTTAGGTTTGCCAGGTT	NM_007014.x-3403s1c1	3UTR	NM_007014	11060	WWP2	WW domain containing E3 ubiquitin protein ligase 2
TRCN0000001513	TRPS0000159531	CGGCACAGAGTCATTTAGATT	NM_007014.x-315s1c1	CDS	NM_007014	11060	WWP2	WW domain containing E3 ubiquitin protein ligase 2
TRCN0000001514	TRPS0000152099	CCTCACCTACTTTCGCTTTAT	NM_007014.x-1891s1c1	CDS	NM_007014	11060	WWP2	WW domain containing E3 ubiquitin protein ligase 2
TRCN0000001515	TRPS0000221121	CCCAAGGTGCATAATCGTCAA	NM_007014.x-173s1c1	CDS	NM_007014	11060	WWP2	WW domain containing E3 ubiquitin protein ligase 2
TRCN0000001516	TRPS0000172223	CCAAAGATTCCTATACCAGTT	NM_007014.x-1249s1c1	CDS	NM_007014	11060	WWP2	WW domain containing E3 ubiquitin protein ligase 2
TRCN0000001517	TRPS0000294490	GCGAGACCCTAGTTAAGAGAA	NM_013257.x-3234s1c1	3UTR	NM_013257	23678	SGK3	serum/glucocorticoid regulated kinase family, member 3
TRCN0000001518	TRPS0000253887	GCAGGACTAAACGAATTCATT	NM_013257.x-488s1c1	CDS	NM_013257	23678	SGK3	serum/glucocorticoid regulated kinase family, member 3
TRCN0000001519	TRPS0000279024	GAACGTAATGTGCTCTTGAAA	NM_013257.x-842s1c1	CDS	NM_013257	23678	SGK3	serum/glucocorticoid regulated kinase family, member 3
TRCN0000001520	TRPS0000291329	GCATTCGTTGGTTTCTCTTAT	NM_013257.x-1655s1c1	CDS	NM_013257	23678	SGK3	serum/glucocorticoid regulated kinase family, member 3
TRCN0000001521	TRPS0000321877	GCCGAGATGTTGCTGAAATGT	NM_013257.x-1302s1c1	CDS	NM_013257	23678	SGK3	serum/glucocorticoid regulated kinase family, member 3
TRCN0000001522	TRPS0000252863	GAAAGAGCTGTGCATTATAAA	NM_013451.x-6666s1c1	3UTR	NM_013451	26509	MYOF	myoferlin
TRCN0000001523	TRPS0000288393	GACCTCACTTTCACTGTTAAT	NM_015052.x-4167s1c1	CDS	NM_015052	23072	HECW1	HECT, C2 and WW domain containing E3 ubiquitin protein ligase 1
TRCN0000001524	TRPS0000199918	CACCCAGATGATGAGGAGATT	NM_015052.x-996s1c1	CDS	NM_015052	23072	HECW1	HECT, C2 and WW domain containing E3 ubiquitin protein ligase 1
TRCN0000001525	TRPS0000198143	CCGTCTCTTCTATTCACAGTA	NM_016281.x-3210s1c1	3UTR	NM_016281	51347	TAOK3	TAO kinase 3
TRCN0000001526	TRPS0000280270	GCAGCAACCATTCCATTCCAA	NM_016281.x-1326s1c1	CDS	NM_016281	51347	TAOK3	TAO kinase 3
TRCN0000001527	TRPS0000334231	GAGTACAATAAGAGGCGAGAA	NM_016281.x-2354s1c1	CDS	NM_016281	51347	TAOK3	TAO kinase 3
TRCN0000001528	TRPS0000269787	GAAAGGCAAGAGCGAGAGATT	NM_016281.x-2888s1c1	CDS	NM_016281	51347	TAOK3	TAO kinase 3
TRCN0000001529	TRPS0000004209	AGCGAGAGAATAAAGAACCTA	NM_016281.x-2864s1c1	CDS	NM_016281	51347	TAOK3	TAO kinase 3
TRCN0000001530	TRPS0000227163	CGGTCAATTAAAGATAGCAAA	NM_020922.x-4699s1c1	CDS	NM_020922	65267	WNK3	WNK lysine deficient protein kinase 3
TRCN0000001531	TRPS0000120490	CGGGACACATTGCTCACTATA	NM_020922.x-2746s1c1	CDS	NM_020922	65267	WNK3	WNK lysine deficient protein kinase 3
TRCN0000001532	TRPS0000308411	GCAGCTCAAATATACCGGAAA	NM_020922.x-1060s1c1	CDS	NM_020922	65267	WNK3	WNK lysine deficient protein kinase 3
TRCN0000001533	TRPS0000365626	GCCTCACGTTTGTCAGTATAA	NM_020922.x-5208s1c1	CDS	NM_020922	65267	WNK3	WNK lysine deficient protein kinase 3
TRCN0000001534	TRPS0000313282	GCAGACTATATGGTTGAAGAT	NM_020922.x-2356s1c1	CDS	NM_020922	65267	WNK3	WNK lysine deficient protein kinase 3
TRCN0000001535	TRPS0000116002	CCGGTGGTCAAGTGTGTAATA	NM_025195.x-1691s1c1	3UTR	NM_025195	10221	TRIB1	tribbles homolog 1 (Drosophila)
TRCN0000001536	TRPS0000051696	CGGGTACATCGACTCAGAAAT	NM_025195.x-1305s1c1	CDS	NM_025195	10221	TRIB1	tribbles homolog 1 (Drosophila)
TRCN0000001537	TRPS0000054741	CAGTGACATTAGTTCCTTCTT	NM_025195.x-1365s1c1	CDS	NM_025195	10221	TRIB1	tribbles homolog 1 (Drosophila)
TRCN0000001538	TRPS0000011945	AGAACCCAGCTTAGACTAGAA	NM_025195.x-925s1c1	CDS	NM_025195	10221	TRIB1	tribbles homolog 1 (Drosophila)
TRCN0000001539	TRPS0000225150	CCATTAAACACTACCAGGACA	NM_025195.x-641s1c1	CDS	NM_025195	10221	TRIB1	tribbles homolog 1 (Drosophila)
TRCN0000001540	TRPS0000384469	GAAGGGCTGAATGGAAGTTAC	NM_032237.x-1338s1c1	3UTR	NM_032237	84197	UNK	protein kinase-like protein SgK196
TRCN0000001541	TRPS0000125095	CCTGATGAATACTCTACTCTA	NM_032237.x-339s1c1	CDS	NM_032237	84197	UNK	protein kinase-like protein SgK196
TRCN0000001542	TRPS0000351923	GACAACACTATGCTTACTGAA	NM_032237.x-685s1c1	CDS	NM_032237	84197	UNK	protein kinase-like protein SgK196
TRCN0000001543	TRPS0000293085	GTCCGATTCCATTTGTTTGAT	NM_032237.x-1159s1c1	CDS	NM_032237	84197	UNK	protein kinase-like protein SgK196
TRCN0000001544	TRPS0000003970	AGCCTGGAGATGAAAGATGAT	NM_032237.x-589s1c1	CDS	NM_032237	84197	UNK	protein kinase-like protein SgK196
TRCN0000001545	TRPS0000116535	CCTGCTTCACTGTTTGTTTAT	NM_033123.x-1980s1c1	CDS	NM_033123	89869	PLCZ1	phospholipase C, zeta 1
TRCN0000001546	TRPS0000122931	CCATAGAAGAATTTAGAGCAA	NM_033123.x-358s1c1	CDS	NM_033123	89869	PLCZ1	phospholipase C, zeta 1
TRCN0000001547	TRPS0000064380	CGTGAATGTCTACTGTTTAAA	NM_033123.x-612s1c1	CDS	NM_033123	89869	PLCZ1	phospholipase C, zeta 1
TRCN0000001548	TRPS0000368508	GTCAAGGTTTAATAGCAGGAA	NM_033123.x-1864s1c1	CDS	NM_033123	89869	PLCZ1	phospholipase C, zeta 1
TRCN0000001549	TRPS0000038003	TGCCTCTTACTCATTCATCAT	NM_033123.x-1672s1c1	CDS	NM_033123	89869	PLCZ1	phospholipase C, zeta 1
TRCN0000001550	TRPS0000059090	CCCATCGAAGTGTTGTGTAAA	NM_139062.x-1022s1c1	CDS	NM_139062	1453	CSNK1D	casein kinase 1, delta
TRCN0000001551	TRPS0000166349	CGAAAGGATTAGCGAGAAGAA	NM_139062.x-991s1c1	CDS	NM_139062	1453	CSNK1D	casein kinase 1, delta
TRCN0000001552	TRPS0000044365	CCAAGAGACAGAAATACGAAA	NM_139062.x-975s1c1	CDS	NM_139062	1453	CSNK1D	casein kinase 1, delta
TRCN0000001553	TRPS0000118606	CGAAGTGTTGTGTAAAGGCTA	NM_139062.x-1027s1c1	CDS	NM_139062	1453	CSNK1D	casein kinase 1, delta
TRCN0000001554	TRPS0000303155	GCAGTGATTCTTGGATTGTTT	NM_145332.x-2844s1c1	3UTR	NM_145332	6885	MAP3K7	mitogen-activated protein kinase kinase kinase 7
TRCN0000001555	TRPS0000220844	CCCGTGTGAACCATCCTAATA	NM_145332.x-550s1c1	CDS	NM_145332	6885	MAP3K7	mitogen-activated protein kinase kinase kinase 7
TRCN0000001556	TRPS0000164833	CAGTGTGTCTTGTGATGGAAT	NM_145332.x-601s1c1	CDS	NM_145332	6885	MAP3K7	mitogen-activated protein kinase kinase kinase 7
TRCN0000001557	TRPS0000371208	GACACACATGACCAATAACAA	NM_145332.x-854s1c1	CDS	NM_145332	6885	MAP3K7	mitogen-activated protein kinase kinase kinase 7
TRCN0000001558	TRPS0000037852	TCCTGCCACAAATGATACTAT	NM_145332.x-1319s1c1	CDS	NM_145332	6885	MAP3K7	mitogen-activated protein kinase kinase kinase 7
TRCN0000001559	TRPS0000377278	GCCTCTTATATCTCTGCTCTT	NM_152280.x-2390s1c1	3UTR	NM_152280	23208	SYT11	synaptotagmin XI
TRCN0000001560	TRPS0000247852	GCATCAGCATATACCCAGAGA	NM_152280.x-435s1c1	CDS	NM_152280	23208	SYT11	synaptotagmin XI
TRCN0000001561	TRPS0000012651	ATAGACCAATTACCCATCAAA	NM_152280.x-608s1c1	CDS	NM_152280	23208	SYT11	synaptotagmin XI
TRCN0000001562	TRPS0000096768	CATCAAAGTGCGGAGAGACAA	NM_152280.x-478s1c1	CDS	NM_152280	23208	SYT11	synaptotagmin XI
TRCN0000001563	TRPS0000013006	ATCCTTCCTGACAAACGGCAT	NM_152280.x-857s1c1	CDS	NM_152280	23208	SYT11	synaptotagmin XI
TRCN0000001564	TRPS0000034699	TGTGTGTGAAGTGGTGTATAT	NM_002376.x-2970s1c1	3UTR	NM_002376	4140	MARK3	MAP/microtubule affinity-regulating kinase 3
TRCN0000001565	TRPS0000156587	CATCCCAATATAGTGAAGTTA	NM_002376.x-823s1c1	CDS	NM_002376	4140	MARK3	MAP/microtubule affinity-regulating kinase 3
TRCN0000001566	TRPS0000091833	CCAATTAAACGCGGCACTCTA	NM_002376.x-1363s1c1	CDS	NM_002376	4140	MARK3	MAP/microtubule affinity-regulating kinase 3
TRCN0000001567	TRPS0000024404	TGAATGAACGAGACACTGAAA	NM_002376.x-518s1c1	CDS	NM_002376	4140	MARK3	MAP/microtubule affinity-regulating kinase 3
TRCN0000001568	TRPS0000322813	GCTGTCCACGTACTTAATTTA	NM_002748.x-3734s1c1	3UTR	NM_002748	5597	MAPK6	mitogen-activated protein kinase 6
TRCN0000001569	TRPS0000326338	GACATGACTGAGCCACACAAA	NM_002748.x-1564s1c1	CDS	NM_002748	5597	MAPK6	mitogen-activated protein kinase 6
TRCN0000001570	TRPS0000034055	TGATCTGGGTTCTAGGTATAT	NM_002748.x-798s1c1	CDS	NM_002748	5597	MAPK6	mitogen-activated protein kinase 6
TRCN0000001571	TRPS0000255793	GCTCTCTTACGGAACTGAACA	NM_002748.x-1043s1c1	CDS	NM_002748	5597	MAPK6	mitogen-activated protein kinase 6
TRCN0000001572	TRPS0000201565	CAACGCCAACAGAAGCACATT	NM_002958.x-2002s1c1	3UTR	NM_002958	6259	RYK	RYK receptor-like tyrosine kinase
TRCN0000001573	TRPS0000362116	GCAAGTTAGTAGAGGCCAATA	NM_002958.x-1371s1c1	CDS	NM_002958	6259	RYK	RYK receptor-like tyrosine kinase
TRCN0000001574	TRPS0000376015	GCCCAACAATGCAACTCCTAT	NM_002958.x-958s1c1	CDS	NM_002958	6259	RYK	RYK receptor-like tyrosine kinase
TRCN0000001575	TRPS0000372992	GCTCTATCCTTTAATCTGTTA	NM_002958.x-377s1c1	CDS	NM_002958	6259	RYK	RYK receptor-like tyrosine kinase
TRCN0000001576	TRPS0000064098	CAAGTTAAGATCACAGACAAT	NM_002958.x-1526s1c1	CDS	NM_002958	6259	RYK	RYK receptor-like tyrosine kinase
TRCN0000001577	TRPS0000242005	GAAACAGAATGCCAACCCAAA	NM_003328.x-1674s1c1	3UTR	NM_003328	7294	TXK	TXK tyrosine kinase
TRCN0000001578	TRPS0000330934	GCGACAAATGAGAACACAGAT	NM_003328.x-155s1c1	CDS	NM_003328	7294	TXK	TXK tyrosine kinase
TRCN0000001579	TRPS0000340401	GAATACCTGATACTGGAGAAA	NM_003328.x-408s1c1	CDS	NM_003328	7294	TXK	TXK tyrosine kinase
TRCN0000001580	TRPS0000242294	GCTGCCTGCTTAACTATCTCA	NM_003328.x-1132s1c1	CDS	NM_003328	7294	TXK	TXK tyrosine kinase
TRCN0000001581	TRPS0000029491	TGCACAGAGTATTTCGCCTAA	NM_004954.x-2736s1c1	3UTR	NM_004954	2011	MARK2	MAP/microtubule affinity-regulating kinase 2
TRCN0000001582	TRPS0000064036	CACCAGAAGTTTATTGTCCAT	NM_004954.x-807s1c1	CDS	NM_004954	2011	MARK2	MAP/microtubule affinity-regulating kinase 2
TRCN0000001583	TRPS0000334774	GTGGCGGAGAGGTATTTGATT	NM_004954.x-706s1c1	CDS	NM_004954	2011	MARK2	MAP/microtubule affinity-regulating kinase 2
TRCN0000001584	TRPS0000010315	AGATGATGAACTAAAGCCTTA	NM_004954.x-1235s1c1	CDS	NM_004954	2011	MARK2	MAP/microtubule affinity-regulating kinase 2
TRCN0000001585	TRPS0000029660	TGGGTTATACACGGGAAGAGA	NM_004954.x-1312s1c1	CDS	NM_004954	2011	MARK2	MAP/microtubule affinity-regulating kinase 2
TRCN0000001586	TRPS0000365672	GCGTATCTCTGTTGCTTCTAT	NM_005109.x-1969s1c1	3UTR	NM_005109	9943	OXSR1	oxidative-stress responsive 1
TRCN0000001587	TRPS0000333292	GCAGAACTATTAAGGCACAAA	NM_005109.x-1189s1c1	CDS	NM_005109	9943	OXSR1	oxidative-stress responsive 1
TRCN0000001588	TRPS0000328706	GCCATCATCCTAATATTGTAT	NM_005109.x-551s1c1	CDS	NM_005109	9943	OXSR1	oxidative-stress responsive 1
TRCN0000001589	TRPS0000207540	CCTGATGATGGTAAACTGATA	NM_005109.x-1879s1c1	CDS	NM_005109	9943	OXSR1	oxidative-stress responsive 1
TRCN0000001590	TRPS0000320324	GACTGACTTTATGCCTATGAA	NM_005211.x-3534s1c1	3UTR	NM_005211	1436	CSF1R	colony stimulating factor 1 receptor
TRCN0000001591	TRPS0000210407	CTGCTGACTGTTGAGACCTTA	NM_005211.x-1703s1c1	CDS	NM_005211	1436	CSF1R	colony stimulating factor 1 receptor
TRCN0000001592	TRPS0000127976	CGACTATAAGAACATCCACCT	NM_005211.x-2383s1c1	CDS	NM_005211	1436	CSF1R	colony stimulating factor 1 receptor
TRCN0000001593	TRPS0000045758	CCAGGTTTGAGGGAGAAGTTT	NM_005248.x-2247s1c1	3UTR	NM_005248	2268	FGR	Gardner-Rasheed feline sarcoma viral (v-fgr) oncogene homolog
TRCN0000001594	TRPS0000228571	CTTCCTTGATAGTGGCACCAT	NM_005248.x-339s1c1	CDS	NM_005248	2268	FGR	Gardner-Rasheed feline sarcoma viral (v-fgr) oncogene homolog
TRCN0000001595	TRPS0000371036	GCATGAATAAACGGGAAGTGT	NM_005248.x-1529s1c1	CDS	NM_005248	2268	FGR	Gardner-Rasheed feline sarcoma viral (v-fgr) oncogene homolog
TRCN0000001596	TRPS0000176885	CACATCCTGAACAATACTGAA	NM_005248.x-460s1c1	CDS	NM_005248	2268	FGR	Gardner-Rasheed feline sarcoma viral (v-fgr) oncogene homolog
TRCN0000001597	TRPS0000014711	ACCCTGTTCATTGCCCTGTAT	NM_005248.x-385s1c1	CDS	NM_005248	2268	FGR	Gardner-Rasheed feline sarcoma viral (v-fgr) oncogene homolog
TRCN0000001598	TRPS0000318467	GCACACATCAGGAGTTCAATA	NM_005356.x-1991s1c1	3UTR	NM_005356	3932	LCK	lymphocyte-specific protein tyrosine kinase
TRCN0000001599	TRPS0000006387	AGCCATTAACTACGGGACATT	NM_005356.x-1281s1c1	CDS	NM_005356	3932	LCK	lymphocyte-specific protein tyrosine kinase
TRCN0000001600	TRPS0000143139	CATCAACAAACTCCTGGACAT	NM_005356.x-1062s1c1	CDS	NM_005356	3932	LCK	lymphocyte-specific protein tyrosine kinase
TRCN0000001601	TRPS0000008038	AGCGCCAGAAGCCATTAACTA	NM_005356.x-1272s1c1	CDS	NM_005356	3932	LCK	lymphocyte-specific protein tyrosine kinase
TRCN0000001602	TRPS0000167294	CAGCACTCACACCACTAACAT	NM_005424.x-3795s1c1	3UTR	NM_005424	7075	TIE1	tyrosine kinase with immunoglobulin-like and EGF-like domains 1
TRCN0000001603	TRPS0000100964	CGATGAAGTGTACGAGCTGAT	NM_005424.x-3316s1c1	CDS	NM_005424	7075	TIE1	tyrosine kinase with immunoglobulin-like and EGF-like domains 1
TRCN0000001604	TRPS0000135520	CTTTGGGAGATAGTGAGCCTT	NM_005424.x-3206s1c1	CDS	NM_005424	7075	TIE1	tyrosine kinase with immunoglobulin-like and EGF-like domains 1
TRCN0000001605	TRPS0000016059	AGAGGAGGTTTATGTGAAGAA	NM_005424.x-3088s1c1	CDS	NM_005424	7075	TIE1	tyrosine kinase with immunoglobulin-like and EGF-like domains 1
TRCN0000001606	TRPS0000030989	TGAGGCCAAAGACAGGATACA	NM_005424.x-1605s1c1	CDS	NM_005424	7075	TIE1	tyrosine kinase with immunoglobulin-like and EGF-like domains 1
TRCN0000001607	TRPS0000139063	CCAGCCTACATTCACTTCTAA	NM_005433.x-3252s1c1	3UTR	NM_005433	7525	YES1	v-yes-1 Yamaguchi sarcoma viral oncogene homolog 1
TRCN0000001608	TRPS0000375995	GCAGTTAATTTCAGCAGTCTT	NM_005433.x-161s1c1	CDS	NM_005433	7525	YES1	v-yes-1 Yamaguchi sarcoma viral oncogene homolog 1
TRCN0000001609	TRPS0000192300	CTGCACTGTATGGTCGGTTTA	NM_005433.x-1338s1c1	CDS	NM_005433	7525	YES1	v-yes-1 Yamaguchi sarcoma viral oncogene homolog 1
TRCN0000001610	TRPS0000265544	GTTACTATATTTGTGGCCTTA	NM_005433.x-287s1c1	CDS	NM_005433	7525	YES1	v-yes-1 Yamaguchi sarcoma viral oncogene homolog 1
TRCN0000001611	TRPS0000004962	ACCACGAAAGTAGCAATCAAA	NM_005433.x-905s1c1	CDS	NM_005433	7525	YES1	v-yes-1 Yamaguchi sarcoma viral oncogene homolog 1
TRCN0000001612	TRPS0000390229	GCTGCTACTGTCTTACTATTA	NM_005465.x-1757s1c1	3UTR	NM_005465	10000	AKT3	v-akt murine thymoma viral oncogene homolog 3 (protein kinase B, gamma)
TRCN0000001613	TRPS0000300252	GCCTCTACAACCCATCATAAA	NM_005465.x-484s1c1	CDS	NM_005465	10000	AKT3	v-akt murine thymoma viral oncogene homolog 3 (protein kinase B, gamma)
TRCN0000001614	TRPS0000010027	ACTGGCAAGATGTATATGATA	NM_005465.x-1307s1c1	CDS	NM_005465	10000	AKT3	v-akt murine thymoma viral oncogene homolog 3 (protein kinase B, gamma)
TRCN0000001615	TRPS0000251231	GAAAGGGAAGAATGGACAGAA	NM_005465.x-361s1c1	CDS	NM_005465	10000	AKT3	v-akt murine thymoma viral oncogene homolog 3 (protein kinase B, gamma)
TRCN0000001616	TRPS0000009344	AGAAACCTCAAGATGTGGATT	NM_005465.x-200s1c1	CDS	NM_005465	10000	AKT3	v-akt murine thymoma viral oncogene homolog 3 (protein kinase B, gamma)
TRCN0000001617	TRPS0000323632	GAGAGCATGAAGCAAAGAATT	NM_005607.x-3763s1c1	3UTR	NM_005607	5747	PTK2	PTK2 protein tyrosine kinase 2
TRCN0000001618	TRPS0000163726	CGGAGAATATGGCTGACCTAA	NM_005607.x-1229s1c1	CDS	NM_005607	5747	PTK2	PTK2 protein tyrosine kinase 2
TRCN0000001619	TRPS0000383847	GCCTCCCAGAATATGACAGAT	NM_005607.x-179s1c1	CDS	NM_005607	5747	PTK2	PTK2 protein tyrosine kinase 2
TRCN0000001620	TRPS0000080069	CCGGTCGAATGATAAGGTGTA	NM_005607.x-2973s1c1	CDS	NM_005607	5747	PTK2	PTK2 protein tyrosine kinase 2
TRCN0000001621	TRPS0000158932	CGACAGCAACAGGAAATGGAA	NM_005607.x-2659s1c1	CDS	NM_005607	5747	PTK2	PTK2 protein tyrosine kinase 2
TRCN0000001622	TRPS0000002330	AGTTGAGTGATAGCTGGGAAA	NM_006282.x-1776s1c1	3UTR	NM_006282	6789	STK4	serine/threonine kinase 4
TRCN0000001623	TRPS0000211033	CCGGCCAGATTGTTGCTATTA	NM_006282.x-197s1c1	CDS	NM_006282	6789	STK4	serine/threonine kinase 4
TRCN0000001624	TRPS0000307807	GCCCTCATGTAGTCAAATATT	NM_006282.x-287s1c1	CDS	NM_006282	6789	STK4	serine/threonine kinase 4
TRCN0000001625	TRPS0000377192	GCCAAGCGGAATACAGTGATA	NM_006282.x-577s1c1	CDS	NM_006282	6789	STK4	serine/threonine kinase 4
TRCN0000001626	TRPS0000172306	CTAAGAAGAGACGGCAACAAA	NM_006282.x-1478s1c1	CDS	NM_006282	6789	STK4	serine/threonine kinase 4
TRCN0000001627	TRPS0000065985	CCAGTCATTAAAGTCCAGTAT	NM_006875.x-1226s1c1	3UTR	NM_006875	11040	PIM2	pim-2 oncogene
TRCN0000001628	TRPS0000299141	GCCCAGGATCTCTTTGACTAT	NM_006875.x-549s1c1	CDS	NM_006875	11040	PIM2	pim-2 oncogene
TRCN0000001629	TRPS0000311174	GATGAACCCTACACTGACTTT	NM_006875.x-756s1c1	CDS	NM_006875	11040	PIM2	pim-2 oncogene
TRCN0000001630	TRPS0000155134	CCAGGATCTCTTTGACTATAT	NM_006875.x-551s1c1	CDS	NM_006875	11040	PIM2	pim-2 oncogene
TRCN0000001631	TRPS0000265594	GCTTGACTGGTTTGAGACACA	NM_006875.x-491s1c1	CDS	NM_006875	11040	PIM2	pim-2 oncogene
TRCN0000001632	TRPS0000016756	ACATGACTTTAGCCTCTGCAA	NM_007181.x-2707s1c1	3UTR	NM_007181	11184	MAP4K1	mitogen-activated protein kinase kinase kinase kinase 1
TRCN0000001633	TRPS0000365771	GCCTTCCACAACTTCATCAAA	NM_007181.x-790s1c1	CDS	NM_007181	11184	MAP4K1	mitogen-activated protein kinase kinase kinase kinase 1
TRCN0000001634	TRPS0000294890	GTGAAGATGGAGCCTGATGAT	NM_007181.x-196s1c1	CDS	NM_007181	11184	MAP4K1	mitogen-activated protein kinase kinase kinase kinase 1
TRCN0000001635	TRPS0000242151	GAAGAAGATACACAGGGACAT	NM_007181.x-447s1c1	CDS	NM_007181	11184	MAP4K1	mitogen-activated protein kinase kinase kinase kinase 1
TRCN0000001636	TRPS0000031810	TGGCAAGGAAGAACATGGTTT	NM_007181.x-1826s1c1	CDS	NM_007181	11184	MAP4K1	mitogen-activated protein kinase kinase kinase kinase 1
TRCN0000001637	TRPS0000162170	CCAGTATAAGAGGGACAAGTT	NM_007368.x-2431s1c1	CDS	NM_007368	22821	RASA3	RAS p21 protein activator 3
TRCN0000001638	TRPS0000046508	CCAAGTCCAAATCTGCGAGTT	NM_007368.x-1623s1c1	CDS	NM_007368	22821	RASA3	RAS p21 protein activator 3
TRCN0000001639	TRPS0000012432	ACCTGAAGTTTGGAGATGAAT	NM_007368.x-750s1c1	CDS	NM_007368	22821	RASA3	RAS p21 protein activator 3
TRCN0000001640	TRPS0000004223	AGCAAAGAAGACGAAAGTGAA	NM_007368.x-583s1c1	CDS	NM_007368	22821	RASA3	RAS p21 protein activator 3
TRCN0000001641	TRPS0000384344	GACCTCCACTCATTCCATTTA	NM_007368.x-2530s1c1	CDS	NM_007368	22821	RASA3	RAS p21 protein activator 3
TRCN0000001642	TRPS0000197044	CTCTTAACTATGTCTCTTTGT	NM_014791.x-2409s1c1	3UTR	NM_014791	9833	MELK	maternal embryonic leucine zipper kinase
TRCN0000001643	TRPS0000362551	GCCTGAAAGAAACTCCAATTA	NM_014791.x-1591s1c1	CDS	NM_014791	9833	MELK	maternal embryonic leucine zipper kinase
TRCN0000001644	TRPS0000185366	CTGAGTTAATACAAGGCAAAT	NM_014791.x-700s1c1	CDS	NM_014791	9833	MELK	maternal embryonic leucine zipper kinase
TRCN0000001645	TRPS0000177098	CAGAAACAACAGGCAAACAAT	NM_014791.x-1052s1c1	CDS	NM_014791	9833	MELK	maternal embryonic leucine zipper kinase
TRCN0000001646	TRPS0000243614	GAACCAGCATAAGAGAGAAAT	NM_014791.x-1520s1c1	CDS	NM_014791	9833	MELK	maternal embryonic leucine zipper kinase
TRCN0000001733	TRPS0000088119	CCCAGGCACTAACAGCACTTT	NM_015112.x-5154s1c1	CDS	NM_015112	23139	MAST2	microtubule associated serine/threonine kinase 2
TRCN0000001734	TRPS0000009430	AGACCTGTGTAATATATGCTC	NM_015112.x-5705s1c1	3UTR	NM_015112	23139	MAST2	microtubule associated serine/threonine kinase 2
TRCN0000001735	TRPS0000181577	CCAGTATCCTTTGACAGTGAA	NM_015112.x-1199s1c1	CDS	NM_015112	23139	MAST2	microtubule associated serine/threonine kinase 2
TRCN0000001736	TRPS0000307811	GCACAAATGGAAGAGCGACTA	NM_015112.x-1268s1c1	CDS	NM_015112	23139	MAST2	microtubule associated serine/threonine kinase 2
TRCN0000001737	TRPS0000229128	CGGAGTGTTGAATTAGATGTA	NM_015184.x-1277s1c1	CDS	NM_015184	23228	PLCL2	phospholipase C-like 2
TRCN0000001738	TRPS0000012783	ACTGTGAATGTATGTAGCAAT	NM_015184.x-3402s1c1	3UTR	NM_015184	23228	PLCL2	phospholipase C-like 2
TRCN0000001739	TRPS0000333043	GCTCTATACAACATCACCCAA	NM_015184.x-1501s1c1	CDS	NM_015184	23228	PLCL2	phospholipase C-like 2
TRCN0000001740	TRPS0000226573	CAAACGATGAAACTGGAGAAT	NM_015184.x-3237s1c1	CDS	NM_015184	23228	PLCL2	phospholipase C-like 2
TRCN0000001741	TRPS0000224659	CCGAGGTCACAAAGGAAGAAT	NM_015184.x-846s1c1	CDS	NM_015184	23228	PLCL2	phospholipase C-like 2
TRCN0000001742	TRPS0000004678	AGTGTTATTCTCAAGGCTTTA	NM_018423.x-696s1c1	CDS	NM_018423	55359	STYK1	serine/threonine/tyrosine kinase 1
TRCN0000001743	TRPS0000374917	GTTGGTTACTATCTTCCTCAT	NM_018423.x-365s1c1	CDS	NM_018423	55359	STYK1	serine/threonine/tyrosine kinase 1
TRCN0000001744	TRPS0000147781	CGGGATGTGATGACTATGGAT	NM_018423.x-900s1c1	CDS	NM_018423	55359	STYK1	serine/threonine/tyrosine kinase 1
TRCN0000001745	TRPS0000085724	CAGGGACACAAAGGGAGAAAT	NM_018423.x-1619s1c1	3UTR	NM_018423	55359	STYK1	serine/threonine/tyrosine kinase 1
TRCN0000001746	TRPS0000075559	CGCCTAGAAGCTGCCATTAAA	NM_018423.x-1404s1c1	CDS	NM_018423	55359	STYK1	serine/threonine/tyrosine kinase 1
TRCN0000001747	TRPS0000084593	CATCCAGAAGTTGTCAGTCAT	NM_020168.x-684s1c1	CDS	NM_020168	56924	PAK6	p21 protein (Cdc42/Rac)-activated kinase 6
TRCN0000001748	TRPS0000003717	AGATCAGCAAAGACGTCCCTA	NM_020168.x-2069s1c1	CDS	NM_020168	56924	PAK6	p21 protein (Cdc42/Rac)-activated kinase 6
TRCN0000001749	TRPS0000363227	GCACAGGGATATTTCTAAGAA	NM_020168.x-2708s1c1	3UTR	NM_020168	56924	PAK6	p21 protein (Cdc42/Rac)-activated kinase 6
TRCN0000001750	TRPS0000117578	CGTCTCCCAAGTCAGGCTGAA	NM_020168.x-1896s1c1	CDS	NM_020168	56924	PAK6	p21 protein (Cdc42/Rac)-activated kinase 6
TRCN0000001751	TRPS0000010651	AGTGATCTCCAGGTCTTTGTA	NM_020168.x-2133s1c1	CDS	NM_020168	56924	PAK6	p21 protein (Cdc42/Rac)-activated kinase 6
TRCN0000001752	TRPS0000021232	TGCTGTGAAGTGTATCCCTAA	NM_020397.x-234s1c1	CDS	NM_020397	57118	CAMK1D	calcium/calmodulin-dependent protein kinase ID
TRCN0000001753	TRPS0000017287	AGAATGAGATAGCCGTCCTGA	NM_020397.x-287s1c1	CDS	NM_020397	57118	CAMK1D	calcium/calmodulin-dependent protein kinase ID
TRCN0000001754	TRPS0000000554	AGGCGGAATATGAGTTTGACT	NM_020397.x-791s1c1	CDS	NM_020397	57118	CAMK1D	calcium/calmodulin-dependent protein kinase ID
TRCN0000001755	TRPS0000014181	AGAGCTGTTTGACCGGATAGT	NM_020397.x-399s1c1	CDS	NM_020397	57118	CAMK1D	calcium/calmodulin-dependent protein kinase ID
TRCN0000001756	TRPS0000032232	TGATGGAGAAGGACCCGAATA	NM_020397.x-863s1c1	CDS	NM_020397	57118	CAMK1D	calcium/calmodulin-dependent protein kinase ID
TRCN0000001757	TRPS0000133698	CAGACAGGATTGGAGCAGAAA	NM_031914.x-652s1c1	CDS	NM_031914	83851	SYT16	synaptotagmin XVI
TRCN0000001758	TRPS0000297724	GAGGAGATGAAGGAAACCAAA	NM_031914.x-1816s1c1	CDS	NM_031914	83851	SYT16	synaptotagmin XVI
TRCN0000001759	TRPS0000293814	GAGAGAATGATGGGAGAGAAA	NM_031914.x-1276s1c1	CDS	NM_031914	83851	SYT16	synaptotagmin XVI
TRCN0000001760	TRPS0000156200	CGTTGATGATTTCCGTTTATA	NM_031914.x-1709s1c1	CDS	NM_031914	83851	SYT16	synaptotagmin XVI
TRCN0000001761	TRPS0000329020	GACAAACTAGATCAGGACTTA	NM_031914.x-151s1c1	CDS	NM_031914	83851	SYT16	synaptotagmin XVI
TRCN0000001762	TRPS0000291899	GTTAGCAGTGTTCCAAGCCTT	NM_144489.x-588s1c1	CDS	NM_144489	5998	RGS3	regulator of G-protein signaling 3
TRCN0000001763	TRPS0000188861	CCTCTACCTGGACCTTATTAA	NM_144489.x-888s1c1	CDS	NM_144489	5998	RGS3	regulator of G-protein signaling 3
TRCN0000001764	TRPS0000075959	CTTTCTCCGTTCTGACCTCTA	NM_144489.x-873s1c1	CDS	NM_144489	5998	RGS3	regulator of G-protein signaling 3
TRCN0000001765	TRPS0000062527	CTGGTTCACAAATACGGGTTA	NM_144489.x-571s1c1	CDS	NM_144489	5998	RGS3	regulator of G-protein signaling 3
TRCN0000001766	TRPS0000082336	CAGACGGATAGACATACGGAA	NM_144489.x-1054s1c1	3UTR	NM_144489	5998	RGS3	regulator of G-protein signaling 3
TRCN0000001767	TRPS0000073077	CTGACCTCTTCCAAACTCTAA	NM_173655.x-1301s1c1	CDS	NM_173655	285220	EPHA6	EPH receptor A6
TRCN0000001768	TRPS0000376592	GCTCGGAATATACTGGTCAAT	NM_173655.x-1201s1c1	CDS	NM_173655	285220	EPHA6	EPH receptor A6
TRCN0000001769	TRPS0000326497	GTTTGTGAATTGGCTTGACTT	NM_173655.x-1500s1c1	3UTR	NM_173655	285220	EPHA6	EPH receptor A6
TRCN0000001770	TRPS0000100541	CGTCATCCTCACTTTATTCTT	NM_173655.x-486s1c1	CDS	NM_173655	285220	EPHA6	EPH receptor A6
TRCN0000001771	TRPS0000318263	GCAGCAGAACAAGGACAGATT	NM_173655.x-424s1c1	CDS	NM_173655	285220	EPHA6	EPH receptor A6
TRCN0000001772	TRPS0000298047	GACTGTGAACCTGACTCGATT	NM_004444.x-975s1c1	CDS	NM_004444	2050	EPHB4	EPH receptor B4
TRCN0000001773	TRPS0000218031	CAATGGGAGAGAAGCAGAATA	NM_004444.x-2076s1c1	CDS	NM_004444	2050	EPHB4	EPH receptor B4
TRCN0000001774	TRPS0000027309	TGATCTGAAGTGGGTGACATT	NM_004444.x-459s1c1	CDS	NM_004444	2050	EPHB4	EPH receptor B4
TRCN0000001775	TRPS0000172000	CTACCGTCCTTGTCATAACTT	NM_004444.x-3921s1c1	3UTR	NM_004444	2050	EPHB4	EPH receptor B4
TRCN0000001776	TRPS0000262415	GAAGATAAAGACACTAGGAAT	NM_004690.x-2666s1c1	CDS	NM_004690	9113	LATS1	LATS, large tumor suppressor, homolog 1 (Drosophila)
TRCN0000001777	TRPS0000051523	CACGGCAAGATAGCATGGATT	NM_004690.x-3151s1c1	CDS	NM_004690	9113	LATS1	LATS, large tumor suppressor, homolog 1 (Drosophila)
TRCN0000001778	TRPS0000357964	GTCTGCTTCATACATTCCTAA	NM_004690.x-3614s1c1	CDS	NM_004690	9113	LATS1	LATS, large tumor suppressor, homolog 1 (Drosophila)
TRCN0000001779	TRPS0000095256	CAAGTCAGAAATCCACCCAAA	NM_004690.x-738s1c1	CDS	NM_004690	9113	LATS1	LATS, large tumor suppressor, homolog 1 (Drosophila)
TRCN0000001780	TRPS0000343809	GAGAAATTAAGCCATCGTGTT	NM_004690.x-4412s1c1	3UTR	NM_004690	9113	LATS1	LATS, large tumor suppressor, homolog 1 (Drosophila)
TRCN0000001781	TRPS0000148700	CAAGGCGATTAGGAAACATGA	NM_005044.x-1217s1c1	CDS	NM_005044	5613	PRKX	protein kinase, X-linked
TRCN0000001782	TRPS0000087272	CTAAAGCAGGAGCAACACGTA	NM_005044.x-628s1c1	CDS	NM_005044	5613	PRKX	protein kinase, X-linked
TRCN0000001783	TRPS0000285007	GCGATTAGGAAACATGAAGAA	NM_005044.x-1221s1c1	CDS	NM_005044	5613	PRKX	protein kinase, X-linked
TRCN0000001784	TRPS0000096400	CCTACTGTGATGTCTTGGTTT	NM_005044.x-1710s1c1	3UTR	NM_005044	5613	PRKX	protein kinase, X-linked
TRCN0000001785	TRPS0000311725	GCTGTGGTTCTTATTTGACTA	NM_005906.x-2562s1c1	3UTR	NM_005906	4117	MAK	male germ cell-associated kinase
TRCN0000001786	TRPS0000277214	GATCCACTTAGCACCTCTCAA	NM_005906.x-1912s1c1	CDS	NM_005906	4117	MAK	male germ cell-associated kinase
TRCN0000001787	TRPS0000103364	CTCTATATGTTAAGGCCACTT	NM_005906.x-806s1c1	CDS	NM_005906	4117	MAK	male germ cell-associated kinase
TRCN0000001788	TRPS0000079718	CGTCAAATCATCTGGAATCAA	NM_005906.x-1107s1c1	CDS	NM_005906	4117	MAK	male germ cell-associated kinase
TRCN0000001789	TRPS0000068118	CAATGCCAGTAATGAAGCTAT	NM_005906.x-982s1c1	CDS	NM_005906	4117	MAK	male germ cell-associated kinase
TRCN0000001790	TRPS0000235545	CGGGAGATCAACTGGGAGGAA	NM_006257.x-1924s1c1	CDS	NM_006257	5588	PRKCQ	protein kinase C, theta
TRCN0000001791	TRPS0000100569	CAAGGCCGAATGCTAATGAAT	NM_006257.x-355s1c1	CDS	NM_006257	5588	PRKCQ	protein kinase C, theta
TRCN0000001792	TRPS0000173833	CATCCAAAGCTGCCACAAGTT	NM_006257.x-1428s1c1	CDS	NM_006257	5588	PRKCQ	protein kinase C, theta
TRCN0000001793	TRPS0000151629	CAATAAAGACTGAGACCCGTT	NM_006257.x-2251s1c1	3UTR	NM_006257	5588	PRKCQ	protein kinase C, theta
TRCN0000001794	TRPS0000292938	GAACCTGAACTGAACAAAGAA	NM_006257.x-1102s1c1	CDS	NM_006257	5588	PRKCQ	protein kinase C, theta
TRCN0000001795	TRPS0000386924	GCTCGGCTCTATAACTCTGAA	NM_016507.x-2674s1c1	CDS	NM_016507	51755	CRKRS	Cdc2-related kinase, arginine/serine-rich
TRCN0000001796	TRPS0000317382	GCTGCTTAACATCCACTCCAA	NM_016507.x-3441s1c1	CDS	NM_016507	51755	CRKRS	Cdc2-related kinase, arginine/serine-rich
TRCN0000001797	TRPS0000374172	GCAGAACAGATGACCCTTGAA	NM_016507.x-3607s1c1	CDS	NM_016507	51755	CRKRS	Cdc2-related kinase, arginine/serine-rich
TRCN0000001798	TRPS0000361307	GCACTGAAAGAGGAGATTGTT	NM_016507.x-1552s1c1	CDS	NM_016507	51755	CRKRS	Cdc2-related kinase, arginine/serine-rich
TRCN0000001799	TRPS0000142500	CCATTGAGCATCTTGAACATA	NM_016507.x-5102s1c1	3UTR	NM_016507	51755	CRKRS	Cdc2-related kinase, arginine/serine-rich
TRCN0000001800	TRPS0000354704	GCCTTCCTTCTACCGATCTTA	NM_017771.x-1038s1c1	CDS	NM_017771	54899	PXK	PX domain containing serine/threonine kinase
TRCN0000001801	TRPS0000290964	GTCTAATCAAACTTCTGCCTT	NM_017771.x-686s1c1	CDS	NM_017771	54899	PXK	PX domain containing serine/threonine kinase
TRCN0000001802	TRPS0000000965	ACAGCCACAAACAGTACTATT	NM_017771.x-1937s1c1	3UTR	NM_017771	54899	PXK	PX domain containing serine/threonine kinase
TRCN0000001803	TRPS0000236066	CCACAGTTTAAGATCCCTACA	NM_017771.x-1318s1c1	CDS	NM_017771	54899	PXK	PX domain containing serine/threonine kinase
TRCN0000001804	TRPS0000035037	TCCGCAAACTATACTGAGATT	NM_017771.x-472s1c1	CDS	NM_017771	54899	PXK	PX domain containing serine/threonine kinase
TRCN0000001805	TRPS0000207996	CTCTTCTCTGTATGCACTAAT	NM_018492.x-1087s1c1	CDS	NM_018492	55872	PBK	PDZ binding kinase
TRCN0000001806	TRPS0000173752	CACCAAGCAAATTATCAGAAA	NM_018492.x-227s1c1	CDS	NM_018492	55872	PBK	PDZ binding kinase
TRCN0000001807	TRPS0000325678	GAATATGGCAAGAGGGTTAAA	NM_018492.x-645s1c1	CDS	NM_018492	55872	PBK	PDZ binding kinase
TRCN0000001808	TRPS0000335627	GTCTGTGTCTTGCTATGGAAT	NM_018492.x-530s1c1	CDS	NM_018492	55872	PBK	PDZ binding kinase
TRCN0000001809	TRPS0000003980	AGGACCATAGTTTCTTGTTAA	NM_018492.x-1274s1c1	3UTR	NM_018492	55872	PBK	PDZ binding kinase
TRCN0000001810	TRPS0000046430	CCACTGCTGCTACACTGACTA	NM_020328.x-321s1c1	CDS	NM_020328	91	ACVR1B	activin A receptor, type IB
TRCN0000001811	TRPS0000279187	GCTGTGGCTTGTTTCTGACTA	NM_020328.x-873s1c1	CDS	NM_020328	91	ACVR1B	activin A receptor, type IB
TRCN0000001812	TRPS0000004897	AGCAGAGATATACCAGACGGT	NM_020328.x-783s1c1	CDS	NM_020328	91	ACVR1B	activin A receptor, type IB
TRCN0000001813	TRPS0000197150	CCTTGTCATTAACTATCATCA	NM_020328.x-480s1c1	CDS	NM_020328	91	ACVR1B	activin A receptor, type IB
TRCN0000001814	TRPS0000215867	CGGGCTTGTATATTGGGAGAT	NM_020328.x-1260s1c1	CDS	NM_020328	91	ACVR1B	activin A receptor, type IB
TRCN0000001815	TRPS0000129082	CCTATTGTAAAGAAACGGAAA	NM_032017.x-3733s1c1	3UTR	NM_032017	83931	STK40	serine/threonine kinase 40
TRCN0000001816	TRPS0000093922	CCGGATGGTTAAGAAGATGAA	NM_032017.x-788s1c1	CDS	NM_032017	83931	STK40	serine/threonine kinase 40
TRCN0000001817	TRPS0000292468	GCGAGGAAAGATGGCACGGAT	NM_032017.x-567s1c1	CDS	NM_032017	83931	STK40	serine/threonine kinase 40
TRCN0000001818	TRPS0000352003	GAAATCGTTGAGGACACAGAA	NM_032017.x-762s1c1	CDS	NM_032017	83931	STK40	serine/threonine kinase 40
TRCN0000001819	TRPS0000292467	GCACTACGTCATCAAGGAGAA	NM_032017.x-887s1c1	CDS	NM_032017	83931	STK40	serine/threonine kinase 40
TRCN0000001820	TRPS0000280079	GCAGACCACCAGCATCGACAT	NM_052987.x-648s1c1	CDS	NM_052987	8558	CDK10	cyclin-dependent kinase 10
TRCN0000001821	TRPS0000049504	CCTGTTCATGTACGACCCTAA	NM_052987.x-909s1c1	CDS	NM_052987	8558	CDK10	cyclin-dependent kinase 10
TRCN0000001822	TRPS0000341783	GCTGCACTTCCTGTTCATGTA	NM_052987.x-900s1c1	CDS	NM_052987	8558	CDK10	cyclin-dependent kinase 10
TRCN0000001823	TRPS0000000524	AGATGAGATTGTCGCACTGAA	NM_052987.x-186s1c1	CDS	NM_052987	8558	CDK10	cyclin-dependent kinase 10
TRCN0000001824	TRPS0000316217	GCAACACCTCAACTCATCTTT	NM_145259.x-1945s1c1	3UTR	NM_145259	130399	ACVR1C	activin A receptor, type IC
TRCN0000001825	TRPS0000221993	CAATCTGGTAAATGCTGGAAA	NM_145259.x-717s1c1	CDS	NM_145259	130399	ACVR1C	activin A receptor, type IC
TRCN0000001826	TRPS0000048917	CGGAGGAATTGTTGAGGAGTA	NM_145259.x-1464s1c1	CDS	NM_145259	130399	ACVR1C	activin A receptor, type IC
TRCN0000001827	TRPS0000376792	GCTCCTGAAATGCTTGATGAT	NM_145259.x-1351s1c1	CDS	NM_145259	130399	ACVR1C	activin A receptor, type IC
TRCN0000001828	TRPS0000030893	TCATTATTACTGTGCCTGTTT	NM_145259.x-590s1c1	CDS	NM_145259	130399	ACVR1C	activin A receptor, type IC
TRCN0000001829	TRPS0000389911	GAGAAAGATGAAACTGAGTAT	NM_145687.x-998s1c1	CDS	NM_145687	9448	MAP4K4	mitogen-activated protein kinase kinase kinase kinase 4
TRCN0000001830	TRPS0000264697	GTCTACTATTTGTCCTGGTTA	NM_145687.x-2945s1c1	CDS	NM_145687	9448	MAP4K4	mitogen-activated protein kinase kinase kinase kinase 4
TRCN0000001831	TRPS0000095826	CGAGAGGTGGAAGATAGATTT	NM_145687.x-1661s1c1	CDS	NM_145687	9448	MAP4K4	mitogen-activated protein kinase kinase kinase kinase 4
TRCN0000001832	TRPS0000024759	TCCTTCCTGTTCCTCTTATAT	NM_145687.x-3839s1c1	3UTR	NM_145687	9448	MAP4K4	mitogen-activated protein kinase kinase kinase kinase 4
TRCN0000001834	TRPS0000024563	TCAGCGAGAAGAAGATGTCAA	NM_152221.x-915s1c1	CDS	NM_152221	1454	CSNK1E	casein kinase 1, epsilon
TRCN0000001835	TRPS0000117415	CCAGTGTTTGCTTAGTGTCTT	NM_152221.x-1501s1c1	3UTR	NM_152221	1454	CSNK1E	casein kinase 1, epsilon
TRCN0000001836	TRPS0000283608	GCGCCAGAAGTATGAACGGAT	NM_152221.x-895s1c1	CDS	NM_152221	1454	CSNK1E	casein kinase 1, epsilon
TRCN0000001837	TRPS0000244500	GTATATCCACTCCAAGAACTT	NM_152221.x-583s1c1	CDS	NM_152221	1454	CSNK1E	casein kinase 1, epsilon
TRCN0000001838	TRPS0000063622	CTCTTACCTACGTCAGCTCTT	NM_152221.x-1030s1c1	CDS	NM_152221	1454	CSNK1E	casein kinase 1, epsilon
TRCN0000001839	TRPS0000093380	CGGGAAGCTCACTGTCTGCAT	NM_177402.x-1029s1c1	CDS	NM_177402	127833	SYT2	synaptotagmin II
TRCN0000001840	TRPS0000359221	GAAGAAACAGAAGTCCCATTA	NM_177402.x-2350s1c1	3UTR	NM_177402	127833	SYT2	synaptotagmin II
TRCN0000001841	TRPS0000387443	GAAGAAGACCCTGAACCCATA	NM_177402.x-1164s1c1	CDS	NM_177402	127833	SYT2	synaptotagmin II
TRCN0000001842	TRPS0000031869	TCAATCAGACAGGACATCAAA	NM_182493.x-2050s1c1	CDS	NM_182493	91807	MYLK3	myosin light chain kinase 3
TRCN0000001843	TRPS0000028495	TGAGGAGAATAAAGAGCGAGT	NM_182493.x-587s1c1	CDS	NM_182493	91807	MYLK3	myosin light chain kinase 3
TRCN0000001844	TRPS0000024556	TGCAGAAATACATAGCTCAAA	NM_182493.x-2485s1c1	CDS	NM_182493	91807	MYLK3	myosin light chain kinase 3
TRCN0000001845	TRPS0000175992	CTTCAACTCTGCTGCTCCAAT	NM_182493.x-2578s1c1	3UTR	NM_182493	91807	MYLK3	myosin light chain kinase 3
TRCN0000001846	TRPS0000007253	ACTCGTCTCAAATCCCAACTA	NM_182493.x-2460s1c1	CDS	NM_182493	91807	MYLK3	myosin light chain kinase 3
TRCN0000001847	TRPS0000008582	ACGTGCTCTCTGAATGCCAAA	NM_005704.x-5598s1c1	3UTR	NM_005704	10076	PTPRU	protein tyrosine phosphatase, receptor type, U
TRCN0000001848	TRPS0000111436	CTGTGTGGAATATGACTGGAT	NM_005704.x-528s1c1	CDS	NM_005704	10076	PTPRU	protein tyrosine phosphatase, receptor type, U
TRCN0000001849	TRPS0000180160	CAGCTTTGATTATGCCGACAT	NM_005704.x-1906s1c1	CDS	NM_005704	10076	PTPRU	protein tyrosine phosphatase, receptor type, U
TRCN0000001850	TRPS0000100653	CCGGAACTACAAACCCAACAT	NM_005704.x-4381s1c1	CDS	NM_005704	10076	PTPRU	protein tyrosine phosphatase, receptor type, U
TRCN0000001851	TRPS0000362029	GAGGCAGGTATCACAAAGCAT	NM_005730.x-2662s1c1	3UTR	NM_005730	10106	CTDSP2	CTD (carboxy-terminal domain, RNA polymerase II, polypeptide A) small phosphatase 2
TRCN0000001852	TRPS0000134302	CTAAGAAGCCTCGTGGACGTA	NM_005730.x-391s1c1	CDS	NM_005730	10106	CTDSP2	CTD (carboxy-terminal domain, RNA polymerase II, polypeptide A) small phosphatase 2
TRCN0000001853	TRPS0000289684	GTGTCTCCAGTACCAGTTCTA	NM_005730.x-533s1c1	CDS	NM_005730	10106	CTDSP2	CTD (carboxy-terminal domain, RNA polymerase II, polypeptide A) small phosphatase 2
TRCN0000001854	TRPS0000037626	TGACGGTGCTTGACTATGGAA	NM_005808.x-635s1c1	CDS	NM_005808	10217	CTDSPL	CTD (carboxy-terminal domain, RNA polymerase II, polypeptide A) small phosphatase-like
TRCN0000001855	TRPS0000353760	GCACAGTTCGTTTAAGCCTAT	NM_005808.x-693s1c1	CDS	NM_005808	10217	CTDSPL	CTD (carboxy-terminal domain, RNA polymerase II, polypeptide A) small phosphatase-like
TRCN0000001856	TRPS0000191627	CCCTTGAATCTGCTTTATGTA	NM_005808.x-3551s1c1	3UTR	NM_005808	10217	CTDSPL	CTD (carboxy-terminal domain, RNA polymerase II, polypeptide A) small phosphatase-like
TRCN0000001857	TRPS0000163492	CCTGCCTCATACATCTTCCAT	NM_005808.x-1012s1c1	CDS	NM_005808	10217	CTDSPL	CTD (carboxy-terminal domain, RNA polymerase II, polypeptide A) small phosphatase-like
TRCN0000001858	TRPS0000195395	CCAGTGCAACGTCAGCTTAAA	NM_005808.x-456s1c1	CDS	NM_005808	10217	CTDSPL	CTD (carboxy-terminal domain, RNA polymerase II, polypeptide A) small phosphatase-like
TRCN0000001859	TRPS0000137380	CCTTTGAGACACAGTAACCCT	NM_006116.x-2506s1c1	3UTR	NM_006116	10454	MAP3K7IP1	mitogen-activated protein kinase kinase kinase 7 interacting protein 1
TRCN0000001860	TRPS0000081538	CGCTGCCAAGTCCAAACCAAT	NM_006116.x-797s1c1	CDS	NM_006116	10454	MAP3K7IP1	mitogen-activated protein kinase kinase kinase 7 interacting protein 1
TRCN0000001861	TRPS0000247700	GTTGAGCCCTATGTGGACTTT	NM_006116.x-1452s1c1	CDS	NM_006116	10454	MAP3K7IP1	mitogen-activated protein kinase kinase kinase 7 interacting protein 1
TRCN0000001862	TRPS0000246756	GCCTCCTCAGTATCAGAAGAT	NM_006116.x-452s1c1	CDS	NM_006116	10454	MAP3K7IP1	mitogen-activated protein kinase kinase kinase 7 interacting protein 1
TRCN0000001863	TRPS0000365977	GCGATGATTGACACTGAGTTT	NM_006116.x-951s1c1	CDS	NM_006116	10454	MAP3K7IP1	mitogen-activated protein kinase kinase kinase 7 interacting protein 1
TRCN0000001864	TRPS0000104128	CCCTCGTTGCAGCCACTTAGA	NM_006658.x-173s1c1	CDS	NM_006658	10842	C7orf16	chromosome 7 open reading frame 16
TRCN0000001865	TRPS0000390180	GCAGGACTTGACTTAGCATTA	NM_006658.x-944s1c1	3UTR	NM_006658	10842	C7orf16	chromosome 7 open reading frame 16
TRCN0000001866	TRPS0000034344	TGCAGCCACTTAGATGATCTT	NM_006658.x-180s1c1	CDS	NM_006658	10842	C7orf16	chromosome 7 open reading frame 16
TRCN0000001867	TRPS0000058543	CATTAAGGACTGTGATCTCAA	NM_006658.x-212s1c1	CDS	NM_006658	10842	C7orf16	chromosome 7 open reading frame 16
TRCN0000001868	TRPS0000271134	GAGAGACATCCAAAGGGCAAA	NM_006658.x-387s1c1	CDS	NM_006658	10842	C7orf16	chromosome 7 open reading frame 16
TRCN0000001869	TRPS0000388968	GTACAGACACCTTATGGCATA	NM_007026.x-753s1c1	CDS	NM_007026	11072	DUSP14	dual specificity phosphatase 14
TRCN0000001870	TRPS0000244437	GCTCAAATCACCTCCTCTCTA	NM_007026.x-315s1c1	CDS	NM_007026	11072	DUSP14	dual specificity phosphatase 14
TRCN0000001871	TRPS0000023863	TGCTACCATTGAGATCCCTAA	NM_007026.x-407s1c1	CDS	NM_007026	11072	DUSP14	dual specificity phosphatase 14
TRCN0000001872	TRPS0000259369	GCCCAGGATTATATTAGCATT	NM_007026.x-1409s1c1	3UTR	NM_007026	11072	DUSP14	dual specificity phosphatase 14
TRCN0000001873	TRPS0000129546	CGCGTACCTGATGAAATTCCA	NM_007026.x-602s1c1	CDS	NM_007026	11072	DUSP14	dual specificity phosphatase 14
TRCN0000001874	TRPS0000354947	GCGCTTGCCTAACTCATACTT	NM_007039.x-3915s1c1	3UTR	NM_007039	11099	PTPN21	protein tyrosine phosphatase, non-receptor type 21
TRCN0000001875	TRPS0000119055	CAGCACCAACTCCTTAAATAA	NM_007039.x-1526s1c1	CDS	NM_007039	11099	PTPN21	protein tyrosine phosphatase, non-receptor type 21
TRCN0000001876	TRPS0000386581	GACGCCATACAAATAGCACAA	NM_007039.x-3595s1c1	CDS	NM_007039	11099	PTPN21	protein tyrosine phosphatase, non-receptor type 21
TRCN0000001877	TRPS0000236940	CAACGAATGATGAAAGGTGTA	NM_007039.x-2965s1c1	CDS	NM_007039	11099	PTPN21	protein tyrosine phosphatase, non-receptor type 21
TRCN0000001878	TRPS0000350063	GTGGCCTTACTACATCAGAAA	NM_007039.x-894s1c1	CDS	NM_007039	11099	PTPN21	protein tyrosine phosphatase, non-receptor type 21
TRCN0000001879	TRPS0000162294	CCTCGATTCTCTACACTACTT	NM_007050.x-2155s1c1	CDS	NM_007050	11122	PTPRT	protein tyrosine phosphatase, receptor type, T
TRCN0000001880	TRPS0000147187	CCGTTCTCTCTACTACAATAT	NM_007050.x-3661s1c1	CDS	NM_007050	11122	PTPRT	protein tyrosine phosphatase, receptor type, T
TRCN0000001881	TRPS0000283961	GCAGATTAACACAACGGAGAA	NM_007050.x-349s1c1	CDS	NM_007050	11122	PTPRT	protein tyrosine phosphatase, receptor type, T
TRCN0000001882	TRPS0000043687	CCCACGATGAACTTGCTCTTT	NM_007050.x-7211s1c1	3UTR	NM_007050	11122	PTPRT	protein tyrosine phosphatase, receptor type, T
TRCN0000001883	TRPS0000054670	CTACAAACACATGCGCTTCCT	NM_007079.x-373s1c1	CDS	NM_007079	11156	PTP4A3	protein tyrosine phosphatase type IVA, member 3
TRCN0000001884	TRPS0000024276	TCTCGGCACCTTAAATTATTA	NM_007079.x-1181s1c1	3UTR	NM_007079	11156	PTP4A3	protein tyrosine phosphatase type IVA, member 3
TRCN0000001885	TRPS0000079046	CAATGAACCAAGCCGAGTGAT	NM_007207.x-902s1c1	CDS	NM_007207	11221	DUSP10	dual specificity phosphatase 10
TRCN0000001886	TRPS0000058946	CAAAGGCAAACGACCAATTAT	NM_007207.x-1496s1c1	CDS	NM_007207	11221	DUSP10	dual specificity phosphatase 10
TRCN0000001887	TRPS0000358615	GTGTTTCTGTTGATTGTGTAA	NM_007207.x-2568s1c1	3UTR	NM_007207	11221	DUSP10	dual specificity phosphatase 10
TRCN0000001888	TRPS0000066724	CAGGCTCTCTAAGTCCATCAA	NM_007207.x-553s1c1	CDS	NM_007207	11221	DUSP10	dual specificity phosphatase 10
TRCN0000001889	TRPS0000124505	CCACTATGAGAAAGGCCTGTT	NM_007207.x-1265s1c1	CDS	NM_007207	11221	DUSP10	dual specificity phosphatase 10
TRCN0000001890	TRPS0000254833	GTGATGGATGGACAGCTTCTT	NM_007240.x-858s1c1	CDS	NM_007240	11266	DUSP12	dual specificity phosphatase 12
TRCN0000001891	TRPS0000060515	CCTTTGCTTCTTATCATTCAT	NM_007240.x-1083s1c1	3UTR	NM_007240	11266	DUSP12	dual specificity phosphatase 12
TRCN0000001892	TRPS0000000652	AGTGGATACCTCTAGTGCAAT	NM_007240.x-524s1c1	CDS	NM_007240	11266	DUSP12	dual specificity phosphatase 12
TRCN0000001893	TRPS0000228206	CCCACAAGAGAATGACACCAT	NM_007240.x-751s1c1	CDS	NM_007240	11266	DUSP12	dual specificity phosphatase 12
TRCN0000001894	TRPS0000229290	CCACACACAGATTGATTACAT	NM_014011.x-1214s1c1	CDS	NM_014011	9655	SOCS5	suppressor of cytokine signaling 5
TRCN0000001895	TRPS0000232549	CGCCCAAACAAGTCAGATAAT	NM_014011.x-2602s1c1	3UTR	NM_014011	9655	SOCS5	suppressor of cytokine signaling 5
TRCN0000001896	TRPS0000361527	GATCCCAGTTCGTGCATGTTT	NM_014011.x-1518s1c1	CDS	NM_014011	9655	SOCS5	suppressor of cytokine signaling 5
TRCN0000001897	TRPS0000007560	AGAACCAGTCAAGGCAAAGTA	NM_014011.x-1727s1c1	CDS	NM_014011	9655	SOCS5	suppressor of cytokine signaling 5
TRCN0000001898	TRPS0000038437	TCCCATGAGAACTTACAGCAA	NM_014011.x-704s1c1	CDS	NM_014011	9655	SOCS5	suppressor of cytokine signaling 5
TRCN0000001899	TRPS0000163650	CCACAAACAATGACCAAGTAT	NM_014634.x-3589s1c1	3UTR	NM_014634	9647	PPM1F	protein phosphatase 1F (PP2C domain containing)
TRCN0000001900	TRPS0000166515	CGCGCCTACTTTGCTGTGTTT	NM_014634.x-685s1c1	CDS	NM_014634	9647	PPM1F	protein phosphatase 1F (PP2C domain containing)
TRCN0000001901	TRPS0000015829	ACAGACAGACCTTTCCGAATT	NM_014634.x-378s1c1	CDS	NM_014634	9647	PPM1F	protein phosphatase 1F (PP2C domain containing)
TRCN0000001902	TRPS0000148340	CGTGGGAAAGGATCAAGTAAT	NM_014787.x-2453s1c1	CDS	NM_014787	9829	DNAJC6	DnaJ (Hsp40) homolog, subfamily C, member 6
TRCN0000001903	TRPS0000316024	GCCTCTCACAATTAAGTCGAT	NM_014787.x-844s1c1	CDS	NM_014787	9829	DNAJC6	DnaJ (Hsp40) homolog, subfamily C, member 6
TRCN0000001904	TRPS0000059343	CCAGCTACACAAAGGGAGATT	NM_014787.x-327s1c1	CDS	NM_014787	9829	DNAJC6	DnaJ (Hsp40) homolog, subfamily C, member 6
TRCN0000001905	TRPS0000201735	CACTTATGTTACCTCCAGAAT	NM_014787.x-355s1c1	CDS	NM_014787	9829	DNAJC6	DnaJ (Hsp40) homolog, subfamily C, member 6
TRCN0000001906	TRPS0000377839	GTGGAGATTGAGACAGTGAAA	NM_014906.x-707s1c1	CDS	NM_014906	22843	PPM1E	protein phosphatase 1E (PP2C domain containing)
TRCN0000001907	TRPS0000203714	CCCAGCTTTATTATGAGACAT	NM_014906.x-804s1c1	CDS	NM_014906	22843	PPM1E	protein phosphatase 1E (PP2C domain containing)
TRCN0000001908	TRPS0000221132	CCCTCTAACTAATGGTATCTA	NM_014906.x-4902s1c1	3UTR	NM_014906	22843	PPM1E	protein phosphatase 1E (PP2C domain containing)
TRCN0000001909	TRPS0000150508	CCCAGGTTATGCTTGTGAGAA	NM_014906.x-1176s1c1	CDS	NM_014906	22843	PPM1E	protein phosphatase 1E (PP2C domain containing)
TRCN0000001910	TRPS0000366521	GTCTCATTTACGCCACCACTA	NM_014906.x-2128s1c1	CDS	NM_014906	22843	PPM1E	protein phosphatase 1E (PP2C domain containing)
TRCN0000001911	TRPS0000359604	GCCTCAACCATAAGCGACATT	NM_015316.x-3102s1c1	CDS	NM_015316	23368	PPP1R13B	protein phosphatase 1, regulatory (inhibitor) subunit 13B
TRCN0000001912	TRPS0000227068	CACTCATCCTTTCTCACACTT	NM_015316.x-3866s1c1	3UTR	NM_015316	23368	PPP1R13B	protein phosphatase 1, regulatory (inhibitor) subunit 13B
TRCN0000001913	TRPS0000227708	CCTGGAGATAAACGTACTGAA	NM_015316.x-486s1c1	CDS	NM_015316	23368	PPP1R13B	protein phosphatase 1, regulatory (inhibitor) subunit 13B
TRCN0000001914	TRPS0000198333	CCTGTCGAGATGTTGTAGAAT	NM_015316.x-238s1c1	CDS	NM_015316	23368	PPP1R13B	protein phosphatase 1, regulatory (inhibitor) subunit 13B
TRCN0000001915	TRPS0000259370	GTCTCTCAGTATTGCCTCAAA	NM_015316.x-1262s1c1	CDS	NM_015316	23368	PPP1R13B	protein phosphatase 1, regulatory (inhibitor) subunit 13B
TRCN0000001916	TRPS0000338019	GCTGAGAAGATAGTTGCTGAA	NM_016248.x-5126s1c1	CDS	NM_016248	11215	AKAP11	A kinase (PRKA) anchor protein 11
TRCN0000001917	TRPS0000171990	CCTGTGATGAAAGATGATATA	NM_016248.x-1190s1c1	CDS	NM_016248	11215	AKAP11	A kinase (PRKA) anchor protein 11
TRCN0000001918	TRPS0000286325	GTGGTAATAGTGAGTTGATAA	NM_016248.x-4245s1c1	CDS	NM_016248	11215	AKAP11	A kinase (PRKA) anchor protein 11
TRCN0000001919	TRPS0000289644	GTTGGTAGTTTGTCTGAGAAT	NM_016248.x-3611s1c1	CDS	NM_016248	11215	AKAP11	A kinase (PRKA) anchor protein 11
TRCN0000001920	TRPS0000355636	GCCTATAAAGATTGTGCAGTA	NM_016248.x-6706s1c1	3UTR	NM_016248	11215	AKAP11	A kinase (PRKA) anchor protein 11
TRCN0000001921	TRPS0000255747	GACATCATCCACAGACTCAGA	NM_017726.x-189s1c1	CDS	NM_017726	54866	PPP1R14D	protein phosphatase 1, regulatory (inhibitor) subunit 14D
TRCN0000001922	TRPS0000321482	GCATACTCCTACTGTCTGTGT	NM_017726.x-658s1c1	3UTR	NM_017726	54866	PPP1R14D	protein phosphatase 1, regulatory (inhibitor) subunit 14D
TRCN0000001923	TRPS0000070218	CCTGAGATTGACCTGGAAGCT	NM_017726.x-373s1c1	CDS	NM_017726	54866	PPP1R14D	protein phosphatase 1, regulatory (inhibitor) subunit 14D
TRCN0000001924	TRPS0000162487	CTGGAAGCTCTCATGGATCTA	NM_017726.x-385s1c1	CDS	NM_017726	54866	PPP1R14D	protein phosphatase 1, regulatory (inhibitor) subunit 14D
TRCN0000001926	TRPS0000088622	CCTCTCCTTCTAGCTGCCAAA	NM_018646.x-358s1c1	CDS	NM_018646	55503	TRPV6	transient receptor potential cation channel, subfamily V, member 6
TRCN0000001927	TRPS0000295095	GCCAACTCCATCTTCAATAAA	NM_018646.x-2856s1c1	3UTR	NM_018646	55503	TRPV6	transient receptor potential cation channel, subfamily V, member 6
TRCN0000001928	TRPS0000101489	CATGTATTTCACTCGAGGATT	NM_019841.x-1744s1c1	CDS	NM_019841	56302	TRPV5	transient receptor potential cation channel, subfamily V, member 5
TRCN0000001929	TRPS0000321134	GAGAACCACAATGATCAGAAT	NM_019841.x-2249s1c1	CDS	NM_019841	56302	TRPV5	transient receptor potential cation channel, subfamily V, member 5
TRCN0000001930	TRPS0000087454	CCTGCTCTACATGATCTGCTT	NM_019841.x-1357s1c1	CDS	NM_019841	56302	TRPV5	transient receptor potential cation channel, subfamily V, member 5
TRCN0000001931	TRPS0000391412	GCCTCCGCGTTCTATATCATT	NM_019841.x-1862s1c1	CDS	NM_019841	56302	TRPV5	transient receptor potential cation channel, subfamily V, member 5
TRCN0000001932	TRPS0000226169	CCACCGCTCTTTAACATGAAT	NM_004783.x-1070s1c1	CDS	NM_004783	9344	TAOK2	TAO kinase 2
TRCN0000001933	TRPS0000016230	ACTCCCACAACATGATCCATA	NM_004783.x-831s1c1	CDS	NM_004783	9344	TAOK2	TAO kinase 2
TRCN0000001934	TRPS0000146457	CACCTCTCACAGCTCCATTAT	NM_004783.x-1630s1c1	CDS	NM_004783	9344	TAOK2	TAO kinase 2
TRCN0000001935	TRPS0000030742	TACCACATTGCACAGAACGAA	NM_004783.x-1106s1c1	CDS	NM_004783	9344	TAOK2	TAO kinase 2
TRCN0000001936	TRPS0000329860	GCTTGGCTGGTAATGGAGTAT	NM_004783.x-704s1c1	CDS	NM_004783	9344	TAOK2	TAO kinase 2
TRCN0000001937	TRPS0000187717	CCTTACAGCATCCCTACATCA	NM_138982.x-1125s1c1	CDS	NM_138982	5602	MAPK10	mitogen-activated protein kinase 10
TRCN0000001938	TRPS0000284259	GCCATTAAGAAGCTCAGCAGA	NM_138982.x-338s1c1	CDS	NM_138982	5602	MAPK10	mitogen-activated protein kinase 10
TRCN0000001939	TRPS0000311175	GTAAGAAACTATGTGGAGAAT	NM_138982.x-947s1c1	CDS	NM_138982	5602	MAPK10	mitogen-activated protein kinase 10
TRCN0000001940	TRPS0000141463	CCAATGATGCTTACTACAGAA	NM_138982.x-1700s1c1	3UTR	NM_138982	5602	MAPK10	mitogen-activated protein kinase 10
TRCN0000001941	TRPS0000193933	CAATAAACTCAAAGCCAGCCA	NM_138982.x-1039s1c1	CDS	NM_138982	5602	MAPK10	mitogen-activated protein kinase 10
TRCN0000001942	TRPS0000072485	CCAGGCTTTCAATCAACCCAA	NM_014911.x-2586s1c1	CDS	NM_014911	22848	AAK1	AP2 associated kinase 1
TRCN0000001943	TRPS0000086743	CCAGGTGTGCAAGAGAGAAAT	NM_014911.x-629s1c1	CDS	NM_014911	22848	AAK1	AP2 associated kinase 1
TRCN0000001944	TRPS0000000259	AGACTACCTTTACTGAACTTA	NM_014911.x-3143s1c1	3UTR	NM_014911	22848	AAK1	AP2 associated kinase 1
TRCN0000001945	TRPS0000384444	GCCACCAACAAATTCCAGAAT	NM_014911.x-969s1c1	CDS	NM_014911	22848	AAK1	AP2 associated kinase 1
TRCN0000001946	TRPS0000140752	CCCAGTAAGACAACAGCCAAA	NM_014911.x-2162s1c1	CDS	NM_014911	22848	AAK1	AP2 associated kinase 1
TRCN0000001947	TRPS0000117154	CAGTTTGGAGTGGTCTATGGA	NM_016457.x-1720s1c1	CDS	NM_016457	25865	PRKD2	protein kinase D2
TRCN0000001948	TRPS0000215552	CTTCTACGGCCTTTACGACAA	NM_016457.x-294s1c1	CDS	NM_016457	25865	PRKD2	protein kinase D2
TRCN0000001949	TRPS0000135705	CGTGGCAGTTAAGGTCATTGA	NM_016457.x-1767s1c1	CDS	NM_016457	25865	PRKD2	protein kinase D2
TRCN0000001950	TRPS0000058931	CACGACCAACAGATACTATAA	NM_016457.x-1335s1c1	CDS	NM_016457	25865	PRKD2	protein kinase D2
TRCN0000001951	TRPS0000317083	GAGCAGGTTAAAGATGAATAT	NM_017719.x-1767s1c1	CDS	NM_017719	54861	SNRK	SNF related kinase
TRCN0000001952	TRPS0000268330	GCACTTAACCTAGAGAGAGAA	NM_017719.x-2849s1c1	3UTR	NM_017719	54861	SNRK	SNF related kinase
TRCN0000001953	TRPS0000077731	CACTGAATTGGAACGGATAAA	NM_017719.x-2385s1c1	CDS	NM_017719	54861	SNRK	SNF related kinase
TRCN0000001954	TRPS0000296732	GCAATATCAAGGCCCAGTTTA	NM_017719.x-1298s1c1	CDS	NM_017719	54861	SNRK	SNF related kinase
TRCN0000001955	TRPS0000169219	CTAAAGAGTGTAAAGACCTAA	NM_017719.x-956s1c1	CDS	NM_017719	54861	SNRK	SNF related kinase
TRCN0000001956	TRPS0000022759	TCCGACGAGCTGATATTTACT	NM_020547.x-1292s1c1	CDS	NM_020547	269	AMHR2	anti-Mullerian hormone receptor, type II
TRCN0000001957	TRPS0000010176	ACAGCGAAAGAACTACAGAGT	NM_020547.x-588s1c1	CDS	NM_020547	269	AMHR2	anti-Mullerian hormone receptor, type II
TRCN0000001958	TRPS0000208205	CTACAGCGAAAGAACTACAGA	NM_020547.x-586s1c1	CDS	NM_020547	269	AMHR2	anti-Mullerian hormone receptor, type II
TRCN0000001959	TRPS0000241793	GAGAGAGCATTGTACGAACTT	NM_020547.x-805s1c1	CDS	NM_020547	269	AMHR2	anti-Mullerian hormone receptor, type II
TRCN0000001960	TRPS0000200228	CTAGAAGACTGTTGGGATGCA	NM_020547.x-1528s1c1	CDS	NM_020547	269	AMHR2	anti-Mullerian hormone receptor, type II
TRCN0000001961	TRPS0000216906	CCAAACGAGGAGAGGAATTAA	NM_024800.x-445s1c1	CDS	NM_024800	79858	NEK11	NIMA (never in mitosis gene a)- related kinase 11
TRCN0000001962	TRPS0000081671	CCAGAGAAAGAAATCAGGAAT	NM_024800.x-1797s1c1	CDS	NM_024800	79858	NEK11	NIMA (never in mitosis gene a)- related kinase 11
TRCN0000001963	TRPS0000256824	GCGTTAGAAAGACCAGAGAAA	NM_024800.x-1785s1c1	CDS	NM_024800	79858	NEK11	NIMA (never in mitosis gene a)- related kinase 11
TRCN0000001964	TRPS0000197039	CCATGACTAATAAGGAAGATA	NM_024800.x-2736s1c1	3UTR	NM_024800	79858	NEK11	NIMA (never in mitosis gene a)- related kinase 11
TRCN0000001965	TRPS0000122730	CCTTACCTTGATGAGCAGCTA	NM_024800.x-1146s1c1	CDS	NM_024800	79858	NEK11	NIMA (never in mitosis gene a)- related kinase 11
TRCN0000001966	TRPS0000337508	GCGGACAATTTAGTGAAGTTT	NM_133494.x-171s1c1	CDS	NM_133494	140609	NEK7	NIMA (never in mitosis gene a)-related kinase 7
TRCN0000001967	TRPS0000078003	CTTTAGTTGGTACGCCTTATT	NM_133494.x-630s1c1	CDS	NM_133494	140609	NEK7	NIMA (never in mitosis gene a)-related kinase 7
TRCN0000001968	TRPS0000033580	TCAGATCACTATTCAGAAGAA	NM_133494.x-824s1c1	CDS	NM_133494	140609	NEK7	NIMA (never in mitosis gene a)-related kinase 7
TRCN0000001969	TRPS0000387679	GAAGAGTGTAACCAAAGTAAT	NM_133494.x-970s1c1	3UTR	NM_133494	140609	NEK7	NIMA (never in mitosis gene a)-related kinase 7
TRCN0000001970	TRPS0000316413	GCAGCCAACTTTCTACTCCTA	NM_152619.x-1024s1c1	CDS	NM_152619	166614	DCLK2	doublecortin-like kinase 2
TRCN0000001971	TRPS0000347341	GCCGAGTGAAACATCCCAATA	NM_152619.x-1378s1c1	CDS	NM_152619	166614	DCLK2	doublecortin-like kinase 2
TRCN0000001972	TRPS0000025549	TCAGTCAAATGCTTCAGGTAA	NM_152619.x-1927s1c1	CDS	NM_152619	166614	DCLK2	doublecortin-like kinase 2
TRCN0000001973	TRPS0000250993	GCAAATCACCAGCTTCAGTTA	NM_152619.x-991s1c1	CDS	NM_152619	166614	DCLK2	doublecortin-like kinase 2
TRCN0000001974	TRPS0000192454	CCAGGAGAATGTGCAACTTTA	NM_152619.x-2730s1c1	3UTR	NM_152619	166614	DCLK2	doublecortin-like kinase 2
TRCN0000001975	TRPS0000016089	ACTGACGGACAACCAAAGGAA	NM_170754.x-4107s1c1	CDS	NM_170754	23371	TENC1	tensin like C1 domain containing phosphatase (tensin 2)
TRCN0000001976	TRPS0000045168	CCACTCTTACCATGCGGAAAT	NM_170754.x-914s1c1	CDS	NM_170754	23371	TENC1	tensin like C1 domain containing phosphatase (tensin 2)
TRCN0000001977	TRPS0000002325	AGAGAGCCAAAGCAATGTCAA	NM_170754.x-3507s1c1	CDS	NM_170754	23371	TENC1	tensin like C1 domain containing phosphatase (tensin 2)
TRCN0000001978	TRPS0000051963	CCACCAAATCTCTGAACCACT	NM_170754.x-440s1c1	CDS	NM_170754	23371	TENC1	tensin like C1 domain containing phosphatase (tensin 2)
TRCN0000001979	TRPS0000002884	AGCAGAGATTCAGAGTAGGAT	NM_170754.x-4770s1c1	3UTR	NM_170754	23371	TENC1	tensin like C1 domain containing phosphatase (tensin 2)
TRCN0000001980	TRPS0000390478	GACAGACACTATGCAATGAAA	NM_172207.x-599s1c1	CDS	NM_172207	84254	CAMKK1	calcium/calmodulin-dependent protein kinase kinase 1, alpha
TRCN0000001981	TRPS0000223203	CTGGCCTACAACGAAAGTGAA	NM_172207.x-578s1c1	CDS	NM_172207	84254	CAMKK1	calcium/calmodulin-dependent protein kinase kinase 1, alpha
TRCN0000001982	TRPS0000016236	ACAAGAATCCCGAGACGAGAA	NM_172207.x-1434s1c1	CDS	NM_172207	84254	CAMKK1	calcium/calmodulin-dependent protein kinase kinase 1, alpha
TRCN0000001983	TRPS0000189634	CACGTTGTACTGCTTTGTCTA	NM_172207.x-1285s1c1	CDS	NM_172207	84254	CAMKK1	calcium/calmodulin-dependent protein kinase kinase 1, alpha
TRCN0000001984	TRPS0000015221	AGTGCCCATTCATCGACGATT	NM_172207.x-1311s1c1	CDS	NM_172207	84254	CAMKK1	calcium/calmodulin-dependent protein kinase kinase 1, alpha
TRCN0000001985	TRPS0000069848	CAAGAATATAATGTCCGAGTT	NM_177559.x-949s1c1	CDS	NM_177559	1457	CSNK2A1	casein kinase 2, alpha 1 polypeptide
TRCN0000001986	TRPS0000303971	GCTGCATTTAGGTGGAGACTT	NM_177559.x-1906s1c1	3UTR	NM_177559	1457	CSNK2A1	casein kinase 2, alpha 1 polypeptide
TRCN0000001987	TRPS0000097019	CCAAGAATATAATGTCCGAGT	NM_177559.x-948s1c1	CDS	NM_177559	1457	CSNK2A1	casein kinase 2, alpha 1 polypeptide
TRCN0000001988	TRPS0000017367	ATGAACTACCTACACAATGAT	NM_002446.x-907s1c1	CDS	NM_002446	4294	MAP3K10	mitogen-activated protein kinase kinase kinase 10
TRCN0000001989	TRPS0000366194	GAAGCAAACAGTGGTCATCAA	NM_002446.x-2033s1c1	CDS	NM_002446	4294	MAP3K10	mitogen-activated protein kinase kinase kinase 10
TRCN0000001990	TRPS0000132728	CCTCAAGTCCATCAACATCCT	NM_002446.x-954s1c1	CDS	NM_002446	4294	MAP3K10	mitogen-activated protein kinase kinase kinase 10
TRCN0000001991	TRPS0000245719	GAAGACTGGAAGCTGGAGATT	NM_002446.x-1420s1c1	CDS	NM_002446	4294	MAP3K10	mitogen-activated protein kinase kinase kinase 10
TRCN0000001992	TRPS0000038632	TATCTACAGCACCGACTATTA	NM_002529.x-2022s1c1	CDS	NM_002529	4914	NTRK1	neurotrophic tyrosine kinase, receptor, type 1
TRCN0000001993	TRPS0000038625	TGCCTTCATGGACAACCCTTT	NM_002529.x-1128s1c1	CDS	NM_002529	4914	NTRK1	neurotrophic tyrosine kinase, receptor, type 1
TRCN0000001994	TRPS0000036851	TGGCATGAGCAGGGATATCTA	NM_002529.x-2007s1c1	CDS	NM_002529	4914	NTRK1	neurotrophic tyrosine kinase, receptor, type 1
TRCN0000001995	TRPS0000167975	CATCGAGAACCCACAATACTT	NM_002529.x-1470s1c1	CDS	NM_002529	4914	NTRK1	neurotrophic tyrosine kinase, receptor, type 1
TRCN0000001996	TRPS0000021297	TACATCGAGAACCAGCAGCAT	NM_002529.x-214s1c1	CDS	NM_002529	4914	NTRK1	neurotrophic tyrosine kinase, receptor, type 1
TRCN0000001997	TRPS0000355728	GCTCACCATCATCTCCCTTAT	NM_002609.x-1985s1c1	CDS	NM_002609	5159	PDGFRB	platelet-derived growth factor receptor, beta polypeptide
TRCN0000001998	TRPS0000233436	CCAAAGGAGGACCCATCTATA	NM_002609.x-2371s1c1	CDS	NM_002609	5159	PDGFRB	platelet-derived growth factor receptor, beta polypeptide
TRCN0000001999	TRPS0000230487	CCCTCAGTCTTAATCCATCCA	NM_002609.x-4435s1c1	3UTR	NM_002609	5159	PDGFRB	platelet-derived growth factor receptor, beta polypeptide
TRCN0000002000	TRPS0000346236	GTGGATTCTGATGCCTACTAT	NM_002609.x-951s1c1	CDS	NM_002609	5159	PDGFRB	platelet-derived growth factor receptor, beta polypeptide
TRCN0000002001	TRPS0000357437	GACTCGAATTACATCTCCAAA	NM_002609.x-2916s1c1	CDS	NM_002609	5159	PDGFRB	platelet-derived growth factor receptor, beta polypeptide
TRCN0000002002	TRPS0000009868	AGGAGTGCTAATCTATGAAAT	NM_002731.x-722s1c1	CDS	NM_002731	5567	PRKACB	protein kinase, cAMP-dependent, catalytic, beta
TRCN0000002003	TRPS0000089627	CCTCCATTCACTAGACCTCAT	NM_002731.x-518s1c1	CDS	NM_002731	5567	PRKACB	protein kinase, cAMP-dependent, catalytic, beta
TRCN0000002004	TRPS0000354430	GCCAACTGACTTAACAACATT	NM_002731.x-2459s1c1	3UTR	NM_002731	5567	PRKACB	protein kinase, cAMP-dependent, catalytic, beta
TRCN0000002005	TRPS0000005371	ACTCAGAATAATGCCGGACTT	NM_002731.x-150s1c1	CDS	NM_002731	5567	PRKACB	protein kinase, cAMP-dependent, catalytic, beta
TRCN0000002006	TRPS0000078740	CACGACAGATTGGATTGCTAT	NM_002731.x-944s1c1	CDS	NM_002731	5567	PRKACB	protein kinase, cAMP-dependent, catalytic, beta
TRCN0000002007	TRPS0000202835	CGAGCATCAGAGACCAAGAAA	NM_003024.x-2110s1c1	CDS	NM_003024	6453	ITSN1	intersectin 1 (SH3 domain protein)
TRCN0000002008	TRPS0000299148	GCACGAATGAGAAACCAGAAA	NM_003024.x-2685s1c1	CDS	NM_003024	6453	ITSN1	intersectin 1 (SH3 domain protein)
TRCN0000002009	TRPS0000281829	GCACTAGCTGACATGAATAAT	NM_003024.x-293s1c1	CDS	NM_003024	6453	ITSN1	intersectin 1 (SH3 domain protein)
TRCN0000002010	TRPS0000253514	GCAGTTGTTTGATGAGCCGTA	NM_003024.x-5251s1c1	CDS	NM_003024	6453	ITSN1	intersectin 1 (SH3 domain protein)
TRCN0000002011	TRPS0000000993	ACATCTCTCTTCGGCCTCAAA	NM_003159.x-2750s1c1	CDS	NM_003159	6792	CDKL5	cyclin-dependent kinase-like 5
TRCN0000002012	TRPS0000363646	GTGGAGTTGAAGGAAGCATTT	NM_003159.x-438s1c1	CDS	NM_003159	6792	CDKL5	cyclin-dependent kinase-like 5
TRCN0000002013	TRPS0000145490	CTACATCTATCAGCTAATCAA	NM_003159.x-563s1c1	CDS	NM_003159	6792	CDKL5	cyclin-dependent kinase-like 5
TRCN0000002014	TRPS0000364186	GGAAGAACCAATTAACACCAA	NM_003159.x-3364s1c1	3UTR	NM_003159	6792	CDKL5	cyclin-dependent kinase-like 5
TRCN0000002015	TRPS0000150905	CGACAGAACAACAAGGAGAAT	NM_003159.x-3004s1c1	CDS	NM_003159	6792	CDKL5	cyclin-dependent kinase-like 5
TRCN0000002016	TRPS0000132043	CTTTGGGATACTCATGTGGGA	NM_004445.x-3291s1c1	CDS	NM_004445	2051	EPHB6	EPH receptor B6
TRCN0000002017	TRPS0000032944	TATTTCCAGACACTTCCTCAA	NM_004445.x-2479s1c1	CDS	NM_004445	2051	EPHB6	EPH receptor B6
TRCN0000002018	TRPS0000158389	CACATTCGACTCCACTTCTCT	NM_004445.x-1063s1c1	CDS	NM_004445	2051	EPHB6	EPH receptor B6
TRCN0000002019	TRPS0000016519	AGGTATAAGGACTCACACAAA	NM_004963.x-3280s1c1	3UTR	NM_004963	2984	GUCY2C	guanylate cyclase 2C (heat stable enterotoxin receptor)
TRCN0000002020	TRPS0000226865	CCTGGAGCACTTCGTATGTTT	NM_004963.x-605s1c1	CDS	NM_004963	2984	GUCY2C	guanylate cyclase 2C (heat stable enterotoxin receptor)
TRCN0000002021	TRPS0000210947	CCAGGAATCTATCACCAACAA	NM_004963.x-980s1c1	CDS	NM_004963	2984	GUCY2C	guanylate cyclase 2C (heat stable enterotoxin receptor)
TRCN0000002022	TRPS0000050097	CAGCAGGGATAAGAAGCCAAA	NM_004963.x-3164s1c1	CDS	NM_004963	2984	GUCY2C	guanylate cyclase 2C (heat stable enterotoxin receptor)
TRCN0000002023	TRPS0000145347	CGACAGTGCAAATACGACAAA	NM_004963.x-1558s1c1	CDS	NM_004963	2984	GUCY2C	guanylate cyclase 2C (heat stable enterotoxin receptor)
TRCN0000002024	TRPS0000138146	CTTTACTAGGAGACGCCAATA	NM_005012.x-3128s1c1	CDS	NM_005012	4919	ROR1	receptor tyrosine kinase-like orphan receptor 1
TRCN0000002025	TRPS0000093278	CTCATTTAGCAGACATCGCAA	NM_005012.x-3280s1c1	3UTR	NM_005012	4919	ROR1	receptor tyrosine kinase-like orphan receptor 1
TRCN0000002026	TRPS0000340704	GCACCGTCTATATGGAGTCTT	NM_005012.x-929s1c1	CDS	NM_005012	4919	ROR1	receptor tyrosine kinase-like orphan receptor 1
TRCN0000002027	TRPS0000112675	CATTGCTTTACTCTTCTTCTT	NM_005012.x-1626s1c1	CDS	NM_005012	4919	ROR1	receptor tyrosine kinase-like orphan receptor 1
TRCN0000002028	TRPS0000044182	CGGAGAGCAACTTCATGTAAA	NM_005012.x-2244s1c1	CDS	NM_005012	4919	ROR1	receptor tyrosine kinase-like orphan receptor 1
TRCN0000002029	TRPS0000165174	CCAGGCACTAAATGAGGCTAT	NM_005158.x-156s1c1	CDS	NM_005158	27	ABL2	v-abl Abelson murine leukemia viral oncogene homolog 2 (arg, Abelson-related gene)
TRCN0000002030	TRPS0000075471	CCTCGTCATCTGTTGTTCCAT	NM_005158.x-1580s1c1	CDS	NM_005158	27	ABL2	v-abl Abelson murine leukemia viral oncogene homolog 2 (arg, Abelson-related gene)
TRCN0000002031	TRPS0000364188	GCGAACAGATATTACCATGAA	NM_005158.x-750s1c1	CDS	NM_005158	27	ABL2	v-abl Abelson murine leukemia viral oncogene homolog 2 (arg, Abelson-related gene)
TRCN0000002032	TRPS0000085175	CGGTCAGTATGGAGAGGTTTA	NM_005158.x-786s1c1	CDS	NM_005158	27	ABL2	v-abl Abelson murine leukemia viral oncogene homolog 2 (arg, Abelson-related gene)
TRCN0000002033	TRPS0000069252	CCCTCAAACTCGCAACAAATT	NM_005158.x-3279s1c1	CDS	NM_005158	27	ABL2	v-abl Abelson murine leukemia viral oncogene homolog 2 (arg, Abelson-related gene)
TRCN0000002034	TRPS0000058971	CAGTAAATGCAGACACAGATA	NM_005160.x-1645s1c1	CDS	NM_005160	157	ADRBK2	adrenergic, beta, receptor kinase 2
TRCN0000002035	TRPS0000305196	GAGTTCAGTGTGCATAGGATT	NM_005160.x-630s1c1	CDS	NM_005160	157	ADRBK2	adrenergic, beta, receptor kinase 2
TRCN0000002036	TRPS0000033006	TGGAAGAAAGAGTTGAACGAA	NM_005160.x-1989s1c1	CDS	NM_005160	157	ADRBK2	adrenergic, beta, receptor kinase 2
TRCN0000002037	TRPS0000194879	CAGCCCTTTCAGACAACATAA	NM_005160.x-1226s1c1	CDS	NM_005160	157	ADRBK2	adrenergic, beta, receptor kinase 2
TRCN0000002038	TRPS0000262992	GTCGTGGATGAGTAAGGTGTT	NM_005781.x-837s1c1	CDS	NM_005781	10188	TNK2	tyrosine kinase, non-receptor, 2
TRCN0000002039	TRPS0000033353	TGCTTCCTCTTCCACCCAATT	NM_005781.x-4413s1c1	3UTR	NM_005781	10188	TNK2	tyrosine kinase, non-receptor, 2
TRCN0000002040	TRPS0000033583	TGACGAACTGTATCTGGGAAA	NM_005781.x-2064s1c1	CDS	NM_005781	10188	TNK2	tyrosine kinase, non-receptor, 2
TRCN0000002041	TRPS0000108067	CTGCATAAGATCGACAAGGAG	NM_005781.x-1636s1c1	CDS	NM_005781	10188	TNK2	tyrosine kinase, non-receptor, 2
TRCN0000002042	TRPS0000193456	CAACTTCTCCACCAACAACAG	NM_005781.x-3375s1c1	CDS	NM_005781	10188	TNK2	tyrosine kinase, non-receptor, 2
TRCN0000002043	TRPS0000296478	GCAACGTCAAACTAGGAGATT	NM_006609.x-1588s1c1	CDS	NM_006609	10746	MAP3K2	mitogen-activated protein kinase kinase kinase 2
TRCN0000002044	TRPS0000107299	CCAGATGAATTACACCAGGTT	NM_006609.x-612s1c1	CDS	NM_006609	10746	MAP3K2	mitogen-activated protein kinase kinase kinase 2
TRCN0000002045	TRPS0000227295	CCTTTGGATGGAGAGAGCTAT	NM_006609.x-768s1c1	CDS	NM_006609	10746	MAP3K2	mitogen-activated protein kinase kinase kinase 2
TRCN0000002046	TRPS0000067622	CATATCATCATCAAGAGGTAA	NM_006609.x-913s1c1	CDS	NM_006609	10746	MAP3K2	mitogen-activated protein kinase kinase kinase 2
TRCN0000002047	TRPS0000090448	CAGAATACTAAAGCACCTCAA	NM_006609.x-3032s1c1	3UTR	NM_006609	10746	MAP3K2	mitogen-activated protein kinase kinase kinase 2
TRCN0000002048	TRPS0000309347	GCCTCAATTTATACCAGTGGA	NM_014429.x-1766s1c1	CDS	NM_014429	27136	MORC1	MORC family CW-type zinc finger 1
TRCN0000002049	TRPS0000038439	TGTGGTACTTTGCTGGTTATT	NM_014429.x-642s1c1	CDS	NM_014429	27136	MORC1	MORC family CW-type zinc finger 1
TRCN0000002050	TRPS0000297697	GAATACTTACATGGTCCAATA	NM_014429.x-2672s1c1	CDS	NM_014429	27136	MORC1	MORC family CW-type zinc finger 1
TRCN0000002051	TRPS0000050607	CCCAGAGAAGTCAGATTGCTA	NM_014429.x-2071s1c1	CDS	NM_014429	27136	MORC1	MORC family CW-type zinc finger 1
TRCN0000002052	TRPS0000261621	GCGTGGTTGGAATTGTTAATA	NM_014429.x-1249s1c1	CDS	NM_014429	27136	MORC1	MORC family CW-type zinc finger 1
TRCN0000002053	TRPS0000242200	GAAGAAGGATTAGCAGATGAA	NM_015000.x-336s1c1	CDS	NM_015000	23012	STK38L	serine/threonine kinase 38 like
TRCN0000002054	TRPS0000008778	AGAAGAAAGATACAGGCCATA	NM_015000.x-496s1c1	CDS	NM_015000	23012	STK38L	serine/threonine kinase 38 like
TRCN0000002055	TRPS0000202698	CCAGCAGCAATCCCTATAGAA	NM_015000.x-1356s1c1	CDS	NM_015000	23012	STK38L	serine/threonine kinase 38 like
TRCN0000002056	TRPS0000036558	TGGGAGTGATTATGTATGAAA	NM_015000.x-1099s1c1	CDS	NM_015000	23012	STK38L	serine/threonine kinase 38 like
TRCN0000002057	TRPS0000147274	CCCTGGAGTTAATAGAGTGAT	NM_015000.x-3788s1c1	3UTR	NM_015000	23012	STK38L	serine/threonine kinase 38 like
TRCN0000002058	TRPS0000266531	GCGTCTCACCACAGTCTTAAA	NM_015292.x-2258s1c1	CDS	NM_015292	23344	ESYT1	extended synaptotagmin-like protein 1
TRCN0000002059	TRPS0000361083	GATGTCTCTGTCAAGTCTAAT	NM_015292.x-3216s1c1	CDS	NM_015292	23344	ESYT1	extended synaptotagmin-like protein 1
TRCN0000002060	TRPS0000166520	CCTTTACTGCACGGCCTTTAT	NM_015292.x-3544s1c1	3UTR	NM_015292	23344	ESYT1	extended synaptotagmin-like protein 1
TRCN0000002061	TRPS0000380769	GAGACTTATGAGGTGATGGTA	NM_015292.x-1200s1c1	CDS	NM_015292	23344	ESYT1	extended synaptotagmin-like protein 1
TRCN0000002062	TRPS0000309095	GCAGATTGATGTGGAAGTGAA	NM_015292.x-707s1c1	CDS	NM_015292	23344	ESYT1	extended synaptotagmin-like protein 1
TRCN0000002063	TRPS0000114597	CAGTTTCACATAAGGAGATTT	NM_016123.x-197s1c1	CDS	NM_016123	51135	IRAK4	interleukin-1 receptor-associated kinase 4
TRCN0000002064	TRPS0000158928	CCTCTGCTTAGTATATGTTTA	NM_016123.x-820s1c1	CDS	NM_016123	51135	IRAK4	interleukin-1 receptor-associated kinase 4
TRCN0000002065	TRPS0000229586	CCCAGACATTAAGAAGGTTCA	NM_016123.x-1381s1c1	CDS	NM_016123	51135	IRAK4	interleukin-1 receptor-associated kinase 4
TRCN0000002066	TRPS0000301185	GCCTGACCTAATCCAAGTGAA	NM_016123.x-2142s1c1	3UTR	NM_016123	51135	IRAK4	interleukin-1 receptor-associated kinase 4
TRCN0000002067	TRPS0000182958	CTTTGCAGGATGTTGGTCTTT	NM_016231.x-1422s1c1	CDS	NM_016231	51701	NLK	nemo-like kinase
TRCN0000002068	TRPS0000163027	CGGGAATTGAAGATGTTGTGT	NM_016231.x-762s1c1	CDS	NM_016231	51701	NLK	nemo-like kinase
TRCN0000002069	TRPS0000385893	GCTCAGATCATGTCAAAGTTT	NM_016231.x-922s1c1	CDS	NM_016231	51701	NLK	nemo-like kinase
TRCN0000002070	TRPS0000353014	GAAGGCGCTAAGGCACATATA	NM_016231.x-1320s1c1	CDS	NM_016231	51701	NLK	nemo-like kinase
TRCN0000002071	TRPS0000243050	GTGGGTAGAGAGAATGAGTTT	NM_016231.x-2413s1c1	3UTR	NM_016231	51701	NLK	nemo-like kinase
TRCN0000002072	TRPS0000035624	TGGGACAAAGATGCTGGGAAA	NM_024717.x-974s1c1	CDS	NM_024717	79772	MCTP1	multiple C2 domains, transmembrane 1
TRCN0000002073	TRPS0000059658	CTTTCCAGAGTCCCTTCAGAT	NM_024717.x-2141s1c1	CDS	NM_024717	79772	MCTP1	multiple C2 domains, transmembrane 1
TRCN0000002074	TRPS0000113807	CCTTTCTGGATCTGACACAAT	NM_024717.x-528s1c1	CDS	NM_024717	79772	MCTP1	multiple C2 domains, transmembrane 1
TRCN0000002075	TRPS0000071892	CAGAAGTACATTGAAGAGGAA	NM_024717.x-1640s1c1	CDS	NM_024717	79772	MCTP1	multiple C2 domains, transmembrane 1
TRCN0000002076	TRPS0000230814	CTCAGCAGCATTTCCTTTCTT	NM_024717.x-2305s1c1	3UTR	NM_024717	79772	MCTP1	multiple C2 domains, transmembrane 1
TRCN0000002077	TRPS0000093829	CCAAGGAACAGCAACCAAGTA	NM_030906.x-2398s1c1	CDS	NM_030906	65975	STK33	serine/threonine kinase 33
TRCN0000002078	TRPS0000268088	GCAGTTCAAGTTTCACATCTA	NM_030906.x-2319s1c1	CDS	NM_030906	65975	STK33	serine/threonine kinase 33
TRCN0000002079	TRPS0000263978	GAACACATCATACATCTGGAA	NM_030906.x-1436s1c1	CDS	NM_030906	65975	STK33	serine/threonine kinase 33
TRCN0000002080	TRPS0000196849	CCCTCAAGAACCTCAAATGTA	NM_030906.x-1145s1c1	CDS	NM_030906	65975	STK33	serine/threonine kinase 33
TRCN0000002081	TRPS0000045016	CTTGCCATTAACTTGCTGCTA	NM_030906.x-3035s1c1	3UTR	NM_030906	65975	STK33	serine/threonine kinase 33
TRCN0000002082	TRPS0000374525	GAGAATGAAACTGGAGAGGTA	NM_031437.x-1138s1c1	CDS	NM_031437	83593	RASSF5	Ras association (RalGDS/AF-6) domain family member 5
TRCN0000002083	TRPS0000308865	GCGCTGCACTAACTGTAAATT	NM_031437.x-504s1c1	CDS	NM_031437	83593	RASSF5	Ras association (RalGDS/AF-6) domain family member 5
TRCN0000002084	TRPS0000290942	GCAGAAGATCGACAGCTACAA	NM_031437.x-693s1c1	CDS	NM_031437	83593	RASSF5	Ras association (RalGDS/AF-6) domain family member 5
TRCN0000002085	TRPS0000116136	CTGGGCATGAAACTGAGTGAA	NM_031437.x-733s1c1	CDS	NM_031437	83593	RASSF5	Ras association (RalGDS/AF-6) domain family member 5
TRCN0000002086	TRPS0000335139	GCCACGTACAGGACCATTATT	NM_031437.x-1588s1c1	3UTR	NM_031437	83593	RASSF5	Ras association (RalGDS/AF-6) domain family member 5
[truncated: 63,535 more rows]
