# Supplementary material for: Essential Gene Profiles in Breast, Pancreatic, and Ovarian Cancer Cells
Source: Oxford University Press journal article supplement (doi:10.1158/2159-8290.cd-11-0224), 2011-12-29
Supplement: 21598290cd110224-sup-stab_3_xls_51k.xls [file 21598290cd110224-sup-stab_3_xls_51k.xls]

## Sheet: STable 3
Supplemental Table 3: shRNA class rules.
Class	S1	S2	Ratio	FC2	t0
Fast	s1 < q0.025	abs(s2) < q0.5			> 8
Continuous	s1 < q0.10		0.8 > r > 1.2	< -8	> 8
Slow	abs(s1) < q0.5	S2 < q0.05		< -4
Enhancers	s1 > q0.95	s2 > q0.95			> 6
s1 – slope of expression change from T0 to T1
s2 – slope of expression change from T1 to T2
Ratio – s1 / s2
FC2 – fold-change of expression intensity from T0 to T2
t0 – expression intensity at T0
