# Supplementary material for: Essential Gene Profiles in Breast, Pancreatic, and Ovarian Cancer Cells
Source: Oxford University Press journal article supplement (doi:10.1158/2159-8290.cd-11-0224), 2011-12-29
Supplement: 21598290cd110224-sup-stab_5b_xls_85kb.xls [file 21598290cd110224-sup-stab_5b_xls_85kb.xls]

## Sheet: STable 5b
Supplemental Table 5: Genes selected for the siRNA followup experiment and the results.
Genes Targetted by Classified Hairpins
			MDA-MB-231				MIA PaCa-2				KP-4			Primary Screen - Gene Ranks
Gene.name	MB231	MB231_sd	Mean (sd)	MB231_padj	MiaPaca	MiaPaca_sd	Mean (sd)	MiaPaca_padj	KP4	KP4_sd	Mean (sd)	KP4_padj	Class	MB231	MiaPaca	KP4	Cell Lines Hit
AQR	0.510131	0.0488481	0.51 (0.049)	0.0471371	0.700865	0.0568776	0.7 (0.057)	0.0489451	0.363636	0.00872281	0.36 (0.009)	0.0466199	Fast	13	31	8	70
ARCN1	0.668523	0.0326951	0.67 (0.033)	0.0471371	0.35786	0.109143	0.36 (0.109)	0.0489451	0.673678	0.0300452	0.67 (0.03)	0.0466199	Fast	18	660	30	67
COPZ1	0.526094	0.00758994	0.53 (0.008)	0.0471371	0.379842	0.039114	0.38 (0.039)	0.0489451	0.602678	0.0106612	0.6 (0.011)	0.0466199	Fast	3	13079	239	54
EIF3B	0.657376	0.186635	0.66 (0.187)	0.0471371	0.578881	0.182931	0.58 (0.183)	0.0489451	0.553198	0.132974	0.55 (0.133)	0.0466199	Fast	11	6	68	70
HNRNPC	0.547011	0.0387282	0.55 (0.039)	0.0471371	0.681179	0.00580732	0.68 (0.006)	0.0489451	0.467943	0.0174456	0.47 (0.017)	0.0466199	Fast	62	20	13	70
PABPN1	0.626138	0.0264675	0.63 (0.026)	0.0471371	0.935534	0.109314	0.94 (0.109)	0.473641	1.10831	0.0441956	1.11 (0.044)	0.0466199	Fast	58	688	88	64
POLR2D	0.663569	0.0622764	0.66 (0.062)	0.0471371	0.776471	0.00631973	0.78 (0.006)	0.0489451	0.865433	0.056989	0.87 (0.057)	0.0466199	Fast	252	38	56	71
POLR2E	0.736228	0.0408689	0.74 (0.041)	0.0471371	0.76391	0.0230585	0.76 (0.023)	0.0489451	0.744404	0.0420633	0.74 (0.042)	0.0466199	Fast	2161	2599	1028	27
PSMA1	0.827741	0.0118714	0.83 (0.012)	0.0471371	1.02225	0.00273286	1.02 (0.003)	0.331545	0.426138	0.023067	0.43 (0.023)	0.0466199	Fast	40	48	65	67
PSMB2	0.809438	0.0611088	0.81 (0.061)	0.0471371	0.747364	0.036552	0.75 (0.037)	0.0489451	0.480827	0.126772	0.48 (0.127)	0.0466199	Fast	42	4	14	68
RAN	0.631918	0.0202398	0.63 (0.02)	0.0471371	0.81524	0.00614893	0.82 (0.006)	0.0489451	0.444367	0.00930433	0.44 (0.009)	0.0466199	Fast	1	3	39	71
RPS17	0.639349	0.00817378	0.64 (0.008)	0.0471371	0.8214	0.00563652	0.82 (0.006)	0.0489451	0.676831	0.0992462	0.68 (0.099)	0.0466199	Fast	90	28	22	70
SF3B2	0.398939	0.0484589	0.4 (0.048)	0.0471371	0.793984	0.118538	0.79 (0.119)	0.0489451	0.834868	0.184342	0.83 (0.184)	0.0718455	Fast	48	71	23	70
SNRPD2	0.700311	0.0686987	0.7 (0.069)	0.0471371	0.722001	0.0126395	0.72 (0.013)	0.0489451	0.517697	0.166896	0.52 (0.167)	0.0466199	Fast	36	11	55	69
THOC1	0.912235	0.00214075	0.91 (0.002)	0.0986473	0.764635	0.0312571	0.76 (0.031)	0.0489451	0.90902	0.0628043	0.91 (0.063)	0.0545504	Fast	12847	6901	7812	1
UBA1	0.955996	0.0153745	0.96 (0.015)	0.266357	0.890605	0.0273286	0.89 (0.027)	0.0489451	0.996605	0.000581521	1 (0.001)	0.747426	Fast	1438	1284	5453	53
VCP	0.727421	0.0272459	0.73 (0.027)	0.0471371	1.03131	0.029549	1.03 (0.03)	0.252336	0.697528	0.142085	0.7 (0.142)	0.0466199	Fast	2	4152	59	63
MOCK TRANSFECTION	1	0.0622489	1 (0.062)	1	1	0.0311154	1 (0.031)	1	1	0.0332007	1 (0.033)	1	Mock
ACTL6B	0.846869	0.0151799	0.85 (0.015)	0.0471371	1.00812	0.040822	1.01 (0.041)	0.686423	0.930265	0.0339221	0.93 (0.034)	0.0592439	Slow	1897	1373	3001	9
ALDH1A3	0.893657	0.0116768	0.89 (0.012)	0.0813245	0.972854	0.0432133	0.97 (0.043)	0.338285	1.01346	0.0612535	1.01 (0.061)	0.763747	Slow	4975	2985	3562	0
ANKFY1	0.749164	0.0533242	0.75 (0.053)	0.0471371	0.894711	0.0109314	0.89 (0.011)	0.0489451	0.945206	0.102348	0.95 (0.102)	0.580541	Slow	562	872	1699	5
APOBEC4	0.923107	0.0758994	0.92 (0.076)	0.15466	0.97225	0.0102482	0.97 (0.01)	0.237895	0.90107	0.0108551	0.9 (0.011)	0.0466199	Slow	10083	10027	10927	0
BRIX1	0.86875	0.114238	0.87 (0.114)	0.0986473	0.977081	0.0160555	0.98 (0.016)	0.291587	0.738099	0.0633858	0.74 (0.063)	0.0466199	Slow	431	1600	258	15
CCDC135	0.806824	0.00291921	0.81 (0.003)	0.0471371	0.907755	0.0372352	0.91 (0.037)	0.0489451	1.01182	0.00852897	1.01 (0.009)	0.658415	Slow	5137	13308	6155	0
CCDC58	0.764714	0.019656	0.76 (0.02)	0.0471371	0.792897	0.0329651	0.79 (0.033)	0.0489451	0.907101	0.0124058	0.91 (0.012)	0.0466199	Slow	9618	976	2852	1
CSNK2B	0.716275	0.210767	0.72 (0.211)	0.0471371	1.14194	0.0203256	1.14 (0.02)	0.0489451	0.905868	0.0463278	0.91 (0.046)	0.0466199	Slow	3467	8828	9395	2
DEC1	0.999482	0.0309436	1 (0.031)	0.796749	0.851715	0.0618309	0.85 (0.062)	0.0489451	0.995646	0.00775361	1 (0.008)	0.755611	Slow	8736	10899	8839	0
EIF3F	0.747375	0.0430097	0.75 (0.043)	0.0471371	0.957032	0.0126395	0.96 (0.013)	0.082841	1.02484	0.00019384	1.02 (0)	0.311802	Slow	4664	3500	1418	21
EPGN	1.00416	0.0348359	1 (0.035)	0.917936	1.03083	0.0093942	1.03 (0.009)	0.174915	0.9548	0.0236485	0.95 (0.024)	0.0963518	Slow	10102	10766	6451	0
EXOSC6	0.857052	0.0910793	0.86 (0.091)	0.0795887	0.873092	0.0370644	0.87 (0.037)	0.0489451	0.768939	0.148094	0.77 (0.148)	0.0466199	Slow	11723	564	3147	15
GAR1	0.84453	0.0293867	0.84 (0.029)	0.0471371	1.02672	0.0138351	1.03 (0.014)	0.267345	0.861458	0.0366358	0.86 (0.037)	0.0466199	Slow	2496	361	142	17
HLA-DQA1	0.652973	0.00408689	0.65 (0.004)	0.0471371	0.931186	0.00375768	0.93 (0.004)	0.0496679	1.04143	0.037605	1.04 (0.038)	0.175733	Slow	15094	6752	7287	0
LCLAT1	1.05164	0.00311382	1.05 (0.003)	0.254712	1.00305	0.00597812	1 (0.006)	0.897729	1.00976	0.0122119	1.01 (0.012)	0.771848	Slow	13659	3532	2522	8
MMP2	1.03677	NA	1.04 (- - -)	NA	0.956549	0.0611477	0.96 (0.061)	0.291587	1.06774	0.0581521	1.07 (0.058)	0.0963518	Slow	4303	1599	1547	5
NDUFA1	0.912098	0.0669472	0.91 (0.067)	0.15466	1.01537	0.0169096	1.02 (0.017)	0.499665	0.85063	0.0259746	0.85 (0.026)	0.0466199	Slow	6817	4422	4618	2
NPIP	1.0654	0.0704502	1.07 (0.07)	0.328349	0.985052	0.0119562	0.99 (0.012)	0.499665	0.995509	0.0560198	1 (0.056)	0.933998	Slow	1664	5410	3273	5
NPM1	0.974161	0.00642226	0.97 (0.006)	0.423051	1.03191	0.0102482	1.03 (0.01)	0.166327	1.05568	0.0391557	1.06 (0.039)	0.0963518	Slow	7019	10628	8485	3
NUP35	0.914162	0.0142068	0.91 (0.014)	0.120796	1.04508	0.0404804	1.05 (0.04)	0.183173	1.12874	0.0102735	1.13 (0.01)	0.0466199	Slow	14693	9152	4886	4
PPP1R3B	0.892694	0.0130391	0.89 (0.013)	0.0813245	1.09375	0.0177636	1.09 (0.018)	0.0489451	0.937393	0.0226793	0.94 (0.023)	0.063198	Slow	10428	12337	11748	0
PTPRG	1.01751	0.0611088	1.02 (0.061)	0.796749	1.02455	0.0257913	1.02 (0.026)	0.279295	0.849945	0.0823821	0.85 (0.082)	0.0466199	Slow	15850	5971	11401	0
RAB11B	0.926547	0.110346	0.93 (0.11)	0.254712	0.862343	0.0129811	0.86 (0.013)	0.0489451	0.91464	0.0160887	0.91 (0.016)	0.0478351	Slow	2394	2832	3150	2
RNF128	1.00499	0.0375605	1 (0.038)	0.957855	1.05655	0.0047825	1.06 (0.005)	0.0530204	1.08926	0.078893	1.09 (0.079)	0.0718455	Slow	9907	5207	589	2
RNF152	0.791274	0.0159583	0.79 (0.016)	0.0471371	0.834927	0.00871098	0.83 (0.009)	0.0489451	0.862829	0.0393496	0.86 (0.039)	0.0466199	Slow	6136	7905	11740	0
SAMM50	0.749302	0.00953608	0.75 (0.01)	0.0471371	1.06621	0.00888178	1.07 (0.009)	0.0489451	1.09502	0.0191902	1.1 (0.019)	0.0466199	Slow	8643	1266	1801	9
SERPINA3	0.877006	0.135257	0.88 (0.135)	0.1488	0.971163	0.0128103	0.97 (0.013)	0.237895	0.988244	0.019384	0.99 (0.019)	0.543018	Slow	9212	1311	3112	3
ST3GAL3	0.92985	0.0184883	0.93 (0.018)	0.127704	0.982999	0.00290366	0.98 (0.003)	0.507617	0.994686	0.0292699	0.99 (0.029)	0.79609	Slow	598	1587	8947	6
SUPT16H	0.97939	0.0142068	0.98 (0.014)	0.517606	0.984448	0.0356979	0.98 (0.036)	0.510127	1.06377	0.00639673	1.06 (0.006)	0.0466199	Slow	1720	2518	1344	10
TMEM47	0.785494	0.039312	0.79 (0.039)	0.0471371	0.963312	0.0256205	0.96 (0.026)	0.18781	1.00209	0.0575706	1 (0.058)	0.941049	Slow	8737	2290	4498	1
TMF1	0.821135	0.0243267	0.82 (0.024)	0.0471371	1.10015	0.00597812	1.1 (0.006)	0.0489451	1.06048	0.0029076	1.06 (0.003)	0.0466199	Slow	7038	2501	11624	2
TNKS2	1.00347	0.0214075	1 (0.021)	0.820866	0.954979	0.00324527	0.95 (0.003)	0.061368	0.974812	0.0492354	0.97 (0.049)	0.498648	Slow	5998	5546	13848	6
UBOX5	0.949528	0.0116768	0.95 (0.012)	0.254712	0.947974	0.00153723	0.95 (0.002)	0.061368	0.977142	0.0195779	0.98 (0.02)	0.311802	Slow	4737	9084	9286	1
p<0.05
p<0.05
p<0.05
