# Supplementary material for: Essential Gene Profiles in Breast, Pancreatic, and Ovarian Cancer Cells
Source: Oxford University Press journal article supplement (doi:10.1158/2159-8290.cd-11-0224), 2011-12-29
Supplement: 21598290cd110224-sup-stab_8_xls_155kb.xls [file 21598290cd110224-sup-stab_8_xls_155kb.xls]

## Sheet: STable 8
Supplemental Table 8: Tissue-specific essentials with enrichment analyses.
Tissue Scored As Essential	RefSeq	Entrez Gene Symbol	Entrez Gene ID	UniProtID	Description	Family/Subfamily (PANTHER)	GO_MF	GO_BP	GO_CC	Protein Class (PANTHER)	Pathway (PANTHER)	Cancer	Proliferation	Amplification	Oncogene	Ovarian Cancer	Breast Cancer	Pancreatic Cancer
BREAST	NM_000075	CDK4	1019	P11802	Cell division protein kinase 4;CDK4	SUBFAMILY NOT NAMED (PTHR24056:SF82)	ATP binding;cyclin-dependent protein kinase activity;nucleotide binding;protein binding;	G1 phase of mitotic cell cycle;G1/S transition of mitotic cell cycle;S phase of mitotic cell cycle;cell cycle;cell division;mitotic cell cycle;positive regulation of cell proliferation;positive regulation of fibroblast proliferation;protein phosphorylation;regulation of cell cycle;regulation of gene expression;response to drug;signal transduction;	cyclin-dependent protein kinase holoenzyme complex;cytoplasm;cytosol;membrane;nucleoplasm;nucleus;transcription factor complex;	protein kinase		2487	884	269	1210	64	288	76
BREAST	NM_005163	AKT1	207	P31749	RAC-alpha serine/threonine-protein kinase;AKT1	SUBFAMILY NOT NAMED (PTHR24352:SF69)	ATP binding;enzyme binding;identical protein binding;kinase activity;nitric-oxide synthase regulator activity;nucleotide binding;phosphatidylinositol-3,4,5-trisphosphate binding;phosphatidylinositol-3,4-bisphosphate binding;protein binding;protein kinase activity;protein serine/threonine kinase activity;	G-protein coupled receptor protein signaling pathway;RNA metabolic process;T cell costimulation;activation of pro-apoptotic gene products;activation-induced cell death of T cells;anagen;anti-apoptosis;apoptosis;apoptotic mitochondrial changes;blood coagulation;carbohydrate metabolic process;carbohydrate transport;cell projection organization;cellular response to growth factor stimulus;cellular re…	cytoplasm;cytosol;lamellipodium;microtubule cytoskeleton;nucleoplasm;nucleus;plasma membrane;soluble fraction;spindle;	protein kinase	Ras Pathway->AKT;;Hypoxia response via HIF activation->v-akt murine thymoma viral oncogene homolog 1;;FAS signaling pathway->Apoptosis signal regulating kinase 1;;Huntington disease->Thymoma Viral Proto-Oncogene 1;;Endothelin signaling pathway->Thymoma viral proto-oncogene;;Interleukin signaling pathway->Protein kinase B;;T cell activation->Akt;;Insulin/IGF pathway-protein kinase B signaling casc…	2057	589	64	1918	121	359	76
BREAST	NM_004341	CAD	790	P27708	Dihydroorotase;CAD	ASPARTATE CARBAMOYLTRANSFERASE (PTHR11405:SF2)	ATP binding;aspartate binding;aspartate carbamoyltransferase activity;carbamoyl-phosphate synthase (glutamine-hydrolyzing) activity;dihydroorotase activity;enzyme binding;identical protein binding;ligase activity;metal ion binding;nucleotide binding;protein kinase activity;transferase activity;	'de novo' pyrimidine base biosynthetic process;cellular amino acid metabolic process;drug metabolic process;glutamine metabolic process;nitrogen compound metabolic process;nucleobase, nucleoside and nucleotide metabolic process;peptidyl-threonine phosphorylation;protein autophosphorylation;pyrimidine base metabolic process;pyrimidine nucleoside biosynthetic process;pyrimidine nucleotide biosynthe…	cell projection;cytoplasm;cytosol;neuronal cell body;nuclear matrix;nucleus;terminal button;	transferase	Arginine biosynthesis->Carbamoyl phosphate synthase;;De novo pyrmidine ribonucleotides biosythesis->Carbamoyl phosphate synthetase;;;	1486	44	42	45	15	512	8
BREAST	NM_000506	F2	2147	Q9UNY4	Transcription termination factor 2;TTF2	TRANSCRIPTION TERMINATION FACTOR 2 (RNA POLYMERASE II TERMINATION FACTOR) (PTHR10799:SF63)	calcium ion binding;growth factor activity;peptidase activity;protein binding;receptor binding;serine-type endopeptidase activity;thrombospondin receptor activity;	STAT protein import into nucleus;activation of caspase activity;acute-phase response;apoptosis;blood coagulation;blood coagulation, intrinsic pathway;cell surface receptor linked signaling pathway;cellular protein metabolic process;cytosolic calcium ion homeostasis;fibrinolysis;leukocyte migration;multicellular organismal development;negative regulation of astrocyte differentiation;negative regul…	Golgi lumen;cytosol;endoplasmic reticulum lumen;extracellular region;extracellular space;plasma membrane;soluble fraction;	DNA helicase		798	57	8	40	31	59	11
BREAST	NM_005983	SKP2	6502	Q13309	S-phase kinase-associated protein 2;SKP2	SKP2 (PTHR23125:SF34)	protein binding;ubiquitin-protein ligase activity;	G1/S transition of mitotic cell cycle;G2/M transition of mitotic cell cycle;S phase of mitotic cell cycle;anaphase-promoting complex-dependent proteasomal ubiquitin-dependent protein catabolic process;cell proliferation;mitotic cell cycle;negative regulation of survival gene product expression;positive regulation of estrogen receptor signaling pathway;protein polyubiquitination;regulation of cell…	SCF ubiquitin ligase complex;nucleoplasm;	damaged DNA-binding protein		486	186	33	122	20	58	7
BREAST	NM_003222	TFAP2C	7022	Q92754	Transcription factor AP-2 gamma;TFAP2C	TRANSCRIPTION FACTOR AP-2 GAMMA (PTHR10812:SF9)	DNA binding;protein binding;protein dimerization activity;sequence-specific DNA binding transcription factor activity;	cell-cell signaling;male gonad development;regulation of transcription from RNA polymerase II promoter;transcription, DNA-dependent;	nucleus;	transcription factor		481	50	25	164	12	86	6
BREAST	NM_000392	ABCC2	1244	Q92887	Canalicular multispecific organic anion transporter 1;ABCC2	SUBFAMILY NOT NAMED (PTHR24223:SF37)	ATP binding;ATPase activity;ATPase activity, coupled to transmembrane movement of substances;nucleotide binding;organic anion transmembrane transporter activity;transporter activity;	organic anion transport;transmembrane transport;transport;	apical plasma membrane;integral to plasma membrane;intercellular canaliculus;membrane;membrane fraction;	ATP-binding cassette (ABC) transporter		186	5	1	2	14	74	2
BREAST	NM_005387	NUP98	4928	P52948	Nuclear pore complex protein Nup96;NUP98	SUBFAMILY NOT NAMED (PTHR23198:SF0)	protein binding;structural constituent of nuclear pore;transporter activity;	DNA replication;M phase of mitotic cell cycle;carbohydrate metabolic process;glucose transport;hexose transport;interspecies interaction between organisms;mRNA transport;mitotic cell cycle;mitotic prometaphase;nuclear pore organization;nucleocytoplasmic transport;protein import into nucleus, docking;protein transport;regulation of glucose transport;transmembrane transport;viral reproduction;	Nup107-160 complex;cytosol;kinetochore;membrane;nuclear envelope;nuclear membrane;nuclear pore;nucleoplasm;nucleus;	transporter		177	20	6	96	1	1	1
BREAST	NM_001033	RRM1	6240	P23921	Ribonucleoside-diphosphate reductase large subunit;RRM1	RIBONUCLEOSIDE-DIPHOSPHATE REDUCTASE LARGE CHAIN (PTHR11573:SF6)	ATP binding;oxidoreductase activity;purine nucleotide binding;ribonucleoside-diphosphate reductase activity;	DNA replication;deoxyribonucleotide biosynthetic process;nucleobase, nucleoside and nucleotide interconversion;nucleobase, nucleoside and nucleotide metabolic process;protein heterotetramerization;protein oligomerization;	cytoplasm;cytosol;nucleoplasm;ribonucleoside-diphosphate reductase complex;	reductase	De novo purine biosynthesis->ADP reductase;;De novo pyrimidine deoxyribonucleotide biosynthesis->UDP reductase;;De novo purine biosynthesis->GDP reductase;;De novo pyrimidine deoxyribonucleotide biosynthesis->CDP Reductase;;;;;	174	21	8	11	3	20	19
BREAST	NM_004496	FOXA1	3169	P55317	Hepatocyte nuclear factor 3-alpha;FOXA1	SUBFAMILY NOT NAMED (PTHR11829:SF50)	DNA bending activity;DNA binding;RNA polymerase II core promoter proximal region sequence-specific DNA binding transcription factor activity involved in positive regulation of transcription;double-stranded DNA binding;protein domain specific binding;sequence-specific DNA binding;sequence-specific DNA binding transcription factor activity;sequence-specific enhancer binding RNA polymerase II transc…	chromatin remodeling;embryo development;epithelial cell maturation involved in prostate gland development;epithelial tube branching involved in lung morphogenesis;epithelial-mesenchymal signaling involved in prostate gland development;glucose homeostasis;hormone metabolic process;lung development;lung epithelial cell differentiation;negative regulation of survival gene product expression;negative…	nucleus;transcription factor complex;	transcription factor	Insulin/IGF pathway-protein kinase B signaling cascade->Forkhead transcription factor;;TGF-beta signaling pathway->Co-activators or corepressors;;PI3 kinase pathway->FOXO;;Interleukin signaling pathway->Forkhead in Rhabdomyosarcoma-like 1;;;;;	159	25	4	19	1	75	5
BREAST	NM_002358	MAD2L1	4085	Q13257	Mitotic spindle assembly checkpoint protein MAD2A;MAD2L1	MITOTIC SPINDLE ASSEMBLY CHECKPOINT PROTEIN MAD2A (PTHR11842:SF11)	protein binding;protein homodimerization activity;	M phase of mitotic cell cycle;anaphase-promoting complex-dependent proteasomal ubiquitin-dependent protein catabolic process;cell cycle checkpoint;cell division;mitotic cell cycle;mitotic cell cycle checkpoint;mitotic cell cycle spindle assembly checkpoint;mitotic prometaphase;mitotic sister chromatid segregation;negative regulation of apoptosis;negative regulation of mitotic anaphase-promoting c…	chromosome;condensed chromosome kinetochore;cytoplasm;cytosol;kinetochore;nuclear pore;nucleus;perinuclear region of cytoplasm;spindle pole;			139	18	2	18	5	18	2
BREAST	NM_005954	MT3	4504	P25713	Metallothionein-3;MT3	SUBFAMILY NOT NAMED (PTHR23299:SF0)	antioxidant activity;copper ion binding;metal ion binding;zinc ion binding;	cell proliferation;cellular metal ion homeostasis;negative regulation of neurogenesis;removal of superoxide radicals;response to hypoxia;	synaptic vesicle;			96	11	3	5	6	15	1
BREAST	NM_000209	PDX1	3651	O00330	Pyruvate dehydrogenase protein X component, mitochondrial;PDHX	DIHYDROLIPOAMIDE ACETYLTRANSFERASE COMPONENT OF PYRUVATE DEHYDROGENASE COMPLEX (PTHR23151:SF9)	chromatin binding;sequence-specific DNA binding;sequence-specific DNA binding transcription factor activity;	detection of glucose;endocrine pancreas development;exocrine pancreas development;generation of precursor metabolites and energy;glucose homeostasis;glucose metabolic process;insulin secretion;morphogenesis of embryonic epithelium;multicellular organismal development;negative regulation of cell proliferation;negative regulation of transcription from RNA polymerase II promoter;nitric oxide mediate…	intracellular part;nucleus;	acetyltransferase		85	20	2	17	0	2	79
BREAST	NM_004523	KIF11	3832	P52732	Kinesin-like protein KIF11;KIF11	SUBFAMILY NOT NAMED (PTHR24115:SF151)	ATP binding;microtubule motor activity;nucleotide binding;protein kinase binding;	blood coagulation;cell cycle;cell division;microtubule-based movement;mitosis;mitotic centrosome separation;mitotic spindle organization;spindle assembly involved in mitosis;spindle organization;	chromatin remodeling complex;cytoplasm;cytoskeleton;cytosol;kinesin complex;spindle;spindle microtubule;spindle pole;	microtubule binding motor protein		78	12	0	10	3	6	2
BREAST	NM_002087	GRN	2896	P28799	Granulin-7;GRN	SUBFAMILY NOT NAMED (PTHR12274:SF0)	cytokine activity;growth factor activity;	signal transduction;	extracellular region;extracellular space;	cytokine		73	20	0	7	15	15	0
BREAST	NM_030769	NPL	80896	Q9BXD5	N-acetylneuraminate lyase;NPL	SUBFAMILY NOT NAMED (PTHR12128:SF10)	N-acetylneuraminate lyase activity;lyase activity;	carbohydrate metabolic process;	cytoplasm;	lyase	Lysine biosynthesis->Dihydrodipicolinate synthase;;N-acetylglucosamine metabolism->N-acetylneuraminate lyase;;;	70	0	0	2	2	9	0
BREAST	NM_031443	CCM2	83605	Q9BSQ5	Malcavernin;CCM2	SUBFAMILY NOT NAMED (PTHR21642:SF1)	protein binding;	endothelial tube morphogenesis;integrin-mediated signaling pathway;stress-activated MAPK cascade;vasculogenesis;	cytoplasm;		EGF receptor signaling pathway->Mitogen-activated protein kinase kinase kinase;;	70	6	6	46	1	0	0
BREAST	NM_004529	MLLT3	4300	P42568	Protein AF-9;MLLT3	SUBFAMILY NOT NAMED (PTHR23195:SF19)	protein binding;	anterior/posterior pattern formation;regulation of transcription, DNA-dependent;segment specification;	nucleus;	transcription factor		57	4	1	40	0	2	0
BREAST	NM_001302	CORT	1325	O00230	cortistatin		G-protein-coupled receptor binding;neuropeptide hormone activity;	inhibition of adenylate cyclase activity by G-protein signaling pathway;synaptic transmission;	extracellular region;soluble fraction;			54	1	1	3	2	2	0
BREAST	NM_006144	GZMA	3001	P12544	Granzyme A;GZMA	SUBFAMILY NOT NAMED (PTHR24272:SF96)	identical protein binding;peptidase activity;protein binding;protein homodimerization activity;serine-type endopeptidase activity;	apoptosis;cleavage of lamin;cytolysis;immune response;negative regulation of DNA binding;negative regulation of endodeoxyribonuclease activity;negative regulation of oxidoreductase activity;positive regulation of apoptosis;proteolysis involved in cellular protein catabolic process;	extracellular region;immunological synapse;nucleus;	growth factor		52	3	0	2	0	1	0
BREAST	NM_145052	UPRT	139596	Q96BW1	Uracil phosphoribosyltransferase;UPRT	URACIL PHOSPHORIBOSYLTRANSFERASE (PTHR10285:SF1)	0	nucleoside metabolic process;	cytoplasm;nucleus;	glycosyltransferase	Salvage pyrimidine ribonucleotides->Uracil phosphoribosyltransferase;;	49	4	0	0	0	2	8
BREAST	NM_002048	GAS1	2619	P54826	Growth arrest-specific protein 1;GAS1	SUBFAMILY NOT NAMED (PTHR16840:SF0)	molecular_function;	axon guidance;camera-type eye development;cell cycle;cell cycle arrest;cell fate commitment;cerebellum morphogenesis;developmental growth;dorsal/ventral neural tube patterning;embryonic cranial skeleton morphogenesis;embryonic digit morphogenesis;embryonic skeletal system development;eye morphogenesis;middle ear morphogenesis;negative regulation of S phase of mitotic cell cycle;negative regulatio…	anchored to plasma membrane;plasma membrane;			47	17	1	12	1	1	0
BREAST	NM_001269	RCC1	1104	P18754	Regulator of chromosome condensation;RCC1	REGULATOR OF CHROMOSOME CONDENSATION 1 (PTHR22870:SF16)	DNA binding;Ran guanyl-nucleotide exchange factor activity;chromatin binding;guanyl-nucleotide exchange factor activity;histone binding;nucleosomal DNA binding;protein binding;	G1/S transition of mitotic cell cycle;cell cycle;cell division;chromosome segregation;mitotic spindle organization;regulation of S phase of mitotic cell cycle;regulation of mitosis;spindle assembly;viral reproduction;	condensed nuclear chromosome;cytoplasm;nuclear chromatin;nuclear membrane;nucleolus;nucleoplasm;nucleus;	chromatin/chromatin-binding protein		46	10	1	6	0	4	1
BREAST	NM_012391	SPDEF	25803	O95238	SAM pointed domain-containing Ets transcription factor;SPDEF	ETS-RELATED (PTHR11849:SF22)	sequence-specific DNA binding;sequence-specific DNA binding transcription factor activity;	intestinal epithelial cell development;lung goblet cell differentiation;multicellular organismal development;negative regulation of cell fate commitment;negative regulation of survival gene product expression;negative regulation of transcription from RNA polymerase II promoter;positive regulation of apoptosis;positive regulation of cell fate commitment;positive regulation of transcription from RN…	nucleus;	transcription factor	PDGF signaling pathway->Ets;;	43	10	0	36	3	26	0
BREAST	NM_002687	PNN	5411	Q9H307	Pinin;PNN	SUBFAMILY NOT NAMED (PTHR12707:SF0)	DNA binding;protein binding;structural molecule activity;	RNA splicing;cell adhesion;nuclear mRNA splicing, via spliceosome;regulation of transcription, DNA-dependent;	catalytic step 2 spliceosome;cell-cell junction;cytoplasm;desmosome;intermediate filament;nuclear speck;nucleolus;nucleus;plasma membrane;			36	1	1	3	0	5	2
BREAST	NM_015013	KDM1A	23028	O60341	lysine (K)-specific demethylase 1A		MyoD binding;androgen receptor binding;chromatin binding;demethylase activity;enzyme binding;flavin adenine dinucleotide binding;histone demethylase activity;histone demethylase activity (H3-K4 specific);histone demethylase activity (H3-K9 specific);histone demethylase activity (H3-dimethyl-K4 specific);ligand-dependent nuclear receptor transcription coactivator activity;oxidoreductase activity;p…	blood coagulation;cell proliferation;chromatin modification;histone H3-K4 demethylation;histone H3-K9 demethylation;in utero embryonic development;multicellular organismal development;muscle cell development;negative regulation of DNA binding;negative regulation of DNA damage response, signal transduction by p53 class mediator;negative regulation of apoptosis;negative regulation of protein bindin…	nuclear chromatin;nucleoplasm;nucleus;transcription factor complex;			34	8	0	3	0	4	1
BREAST	NM_020761	RPTOR	57521	Q6DKI0	regulatory associated protein of MTOR, complex 1		protein binding;protein complex binding;	TOR signaling cascade;cell cycle arrest;cell growth;cellular response to amino acid stimulus;cellular response to nutrient levels;insulin receptor signaling pathway;positive regulation of TOR signaling cascade;positive regulation of protein serine/threonine kinase activity;regulation of cell size;	TORC1 complex;cytoplasm;cytosol;lysosome;			34	12	0	16	0	2	0
BREAST	NM_030752	TCP1	6950	P17987	T-complex protein 1 subunit alpha;CCT1	CHAPERONIN CONTAINING T-COMPLEX PROTEIN 1, ALPHA SUBUNIT, TCPA (PTHR11353:SF20)	ATP binding;nucleotide binding;unfolded protein binding;	'de novo' posttranslational protein folding;cellular protein metabolic process;protein folding;tubulin complex assembly;	Golgi apparatus;cell junction;chaperonin-containing T-complex;cytoplasm;cytoskeleton;cytosol;microtubule organizing center;nuclear heterochromatin;nucleolus;nucleus;pericentriolar material;plasma membrane;	chaperonin		34	3	0	2	1	1	0
BREAST	NM_005809	PRDX2	7001	P32119	Peroxiredoxin-2;PRDX2	PEROXIREDOXIN-2 (PTHR10681:SF43)	antioxidant activity;oxidoreductase activity;thioredoxin peroxidase activity;	T cell proliferation;activation of MAPK activity;anti-apoptosis;cell redox homeostasis;cellular response to oxidative stress;homeostasis of number of cells;hydrogen peroxide catabolic process;negative regulation of NF-kappaB transcription factor activity;negative regulation of T cell differentiation;negative regulation of lipopolysaccharide-mediated signaling pathway;positive regulation of blood …	cytoplasm;mitochondrion;	peroxidase		32	7	0	2	1	3	0
BREAST	NM_001256	CDC27	996	P30260	Cell division cycle protein 27 homolog;CDC27	CELL DIVISION CYCLE 27 (PTHR12558:SF5)	protein binding;protein phosphatase binding;	anaphase-promoting complex-dependent proteasomal ubiquitin-dependent protein catabolic process;cell cycle checkpoint;cell proliferation;mitotic cell cycle;mitotic cell cycle spindle assembly checkpoint;mitotic metaphase/anaphase transition;negative regulation of ubiquitin-protein ligase activity involved in mitotic cell cycle;positive regulation of ubiquitin-protein ligase activity involved in mi…	anaphase-promoting complex;centrosome;cytoplasm;cytosol;nucleolus;nucleoplasm;nucleus;spindle;spindle microtubule;	ubiquitin-protein ligase		31	4	0	5	1	5	0
BREAST	NM_004134	HSPA9	3313	P38646	Stress-70 protein, mitochondrial;HSPA9	HEAT SHOCK PROTEIN 70 (HSP70) (PTHR19375:SF1)	ATP binding;enzyme binding;nucleotide binding;protein binding;unfolded protein binding;	anti-apoptosis;protein export from nucleus;protein folding;	cell surface;cytoplasm;mitochondrial nucleoid;mitochondrion;	Hsp70 family chaperone	Apoptosis signaling pathway->Heat shock protein 70;;Parkinson disease->Heat shock protein 70;;;	28	9	0	4	0	2	0
BREAST	NM_014706	SART3	9733	Q15020	Squamous cell carcinoma antigen recognized by T-cells 3;SART3	SUBFAMILY NOT NAMED (PTHR23269:SF0)	RNA binding;nucleotide binding;protein binding;	RNA processing;	cytoplasm;intracellular;nuclear speck;nucleus;	nuclease		28	1	1	3	1	2	3
BREAST	NM_000450	SELE	6401	P16581	E-selectin;SELE	E-SELECTIN (PTHR19325:SF17)	oligosaccharide binding;phospholipase binding;protein binding;sialic acid binding;sugar binding;transmembrane receptor activity;	actin filament-based process;activation of phospholipase C activity;calcium-mediated signaling;cell adhesion;heterophilic cell-cell adhesion;inflammatory response;leukocyte cell-cell adhesion;leukocyte migration involved in inflammatory response;leukocyte tethering or rolling;positive regulation of leukocyte migration;positive regulation of receptor internalization;regulation of inflammatory resp…	caveola;coated pit;cortical cytoskeleton;extracellular space;integral to membrane;membrane raft;perinuclear region of cytoplasm;plasma membrane;	apolipoprotein		26	2	0	0	4	7	2
BREAST	NM_015436	RCHY1	25898	Q96PM5	RING finger and CHY zinc finger domain-containing protein 1;RCHY1	SUBFAMILY NOT NAMED (PTHR21319:SF0)	electron carrier activity;ligase activity;metal ion binding;p53 binding;protein binding;protein homodimerization activity;receptor binding;ubiquitin-protein ligase activity;zinc ion binding;	positive regulation of proteasomal ubiquitin-dependent protein catabolic process;positive regulation of protein ubiquitination;protein autoubiquitination;protein ubiquitination;protein ubiquitination involved in ubiquitin-dependent protein catabolic process;	cytoplasm;nuclear speck;nucleolus;nucleus;ubiquitin ligase complex;	ubiquitin-protein ligase	P53 pathway feedback loops 1->Pirh-2;;P53 pathway feedback loops 1->Pirh-2;;;	26	4	0	10	0	2	1
BREAST	NM_003750	EIF3A	8661	Q14152	Eukaryotic translation initiation factor 3 subunit A;EIF3A	SUBFAMILY NOT NAMED (PTHR14005:SF0)	protein binding;structural molecule activity;translation initiation factor activity;	cellular protein metabolic process;formation of translation initiation complex;gene expression;translation;translational initiation;	cytoplasm;cytosol;eukaryotic translation initiation factor 3 complex;nucleus;	translation factor		25	4	0	2	0	5	1
BREAST	NM_002192	INHBA	3624	P08476	Inhibin beta A chain;INHBA	INHIBIN BETA A, INHBA (PTHR11848:SF28)	cytokine activity;follistatin binding;growth factor activity;hormone activity;identical protein binding;protein binding;protein heterodimerization activity;signal transducer activity;	G1/S transition of mitotic cell cycle;cell cycle arrest;cell differentiation;cell surface receptor linked signaling pathway;cell-cell signaling;cellular response to cholesterol;cellular response to follicle-stimulating hormone stimulus;defense response;erythrocyte differentiation;eyelid development in camera-type eye;growth;hair follicle development;hemoglobin biosynthetic process;hemopoietic pro…	activin A complex;extracellular region;inhibin A complex;	growth factor	TGF-beta signaling pathway->Transforming growth factor beta;;	24	5	0	2	2	1	2
BREAST	NM_004450	ERH	2079	P84090	Enhancer of rudimentary homolog;ERH	SUBFAMILY NOT NAMED (PTHR12373:SF0)	protein binding;	cell cycle;nucleobase, nucleoside, nucleotide and nucleic acid metabolic process;pyrimidine nucleoside metabolic process;	midbody;	transcription factor		22	3	1	3	1	3	0
BREAST	NM_020890	KIAA1524	57650	Q8TCG1	Protein CIP2A;KIAA1524	SUBFAMILY NOT NAMED (PTHR23161:SF2)	protein binding;	0	cytoplasm;integral to membrane;membrane;			21	11	1	13	1	3	0
BREAST	NM_012062	DNM1L	10059	O00429	Dynamin-1-like protein;DNM1L	DYNAMIN (PTHR11566:SF12)	GTP binding;GTPase activity;hydrolase activity;nucleotide binding;protein binding;ubiquitin protein ligase binding;	GTP catabolic process;apoptosis;cellular component disassembly involved in apoptosis;mitochondrial fragmentation involved in apoptosis;mitochondrial membrane organization;positive regulation of mitochondrial fission;	Golgi apparatus;cis-Golgi network;cytoplasm;cytosol;endomembrane system;endoplasmic reticulum;membrane;microsome;mitochondrial outer membrane;mitochondrion;peroxisome;	hydrolase		19	3	0	3	0	0	0
BREAST	NM_030956	TLR10	81793	Q9BXR5	Toll-like receptor 10;TLR10	SUBFAMILY NOT NAMED (PTHR24365:SF62)	transmembrane receptor activity;	MyD88-dependent toll-like receptor signaling pathway;immune response;inflammatory response;innate immune response;signal transduction;	integral to membrane;membrane;plasma membrane;	receptor	Toll receptor signaling pathway->Toll-like receptor 1, 2, 3, 4, 5, 6, 7, 8, 9, 10, 11, 12;;Toll receptor signaling pathway->Toll-like receptor 1, 2, 6;;;	18	5	0	0	0	1	0
BREAST	NM_003347	UBE2L3	7332	P68036	Ubiquitin-conjugating enzyme E2 L3;UBE2L3	SUBFAMILY NOT NAMED (PTHR24068:SF23)	ATP binding;acid-amino acid ligase activity;enzyme binding;ligase activity;nucleotide binding;protein binding;transcription coactivator activity;ubiquitin protein ligase binding;ubiquitin-protein ligase activity;	cell proliferation;cellular response to glucocorticoid stimulus;cellular response to steroid hormone stimulus;protein K11-linked ubiquitination;protein modification process;protein polyubiquitination;protein ubiquitination;regulation of S phase of mitotic cell cycle;regulation of transcription, DNA-dependent;ubiquitin-dependent protein catabolic process;	cytoplasm;nucleus;ubiquitin ligase complex;	ligase	Ubiquitin proteasome pathway->Ubiquitin-conjugating enzyme E2;;Parkinson disease->ubiquitin-conjugating enzyme E2E2;;Parkinson disease->ubiquitin-conjugating enzyme E2L3;;;;	17	1	1	6	0	1	1
BREAST	NM_133259	LRPPRC	10128	P42704	Leucine-rich PPR motif-containing protein, mitochondrial;LRPPRC	SUBFAMILY NOT NAMED (PTHR24015:SF3)	DNA binding;RNA binding;actin filament binding;beta-tubulin binding;microtubule binding;protein binding;single-stranded DNA binding;	mRNA transport;mitochondrion transport along microtubule;regulation of transcription, DNA-dependent;transport;	condensed nuclear chromosome;cytoplasm;cytoskeleton;membrane;mitochondrial nucleoid;mitochondrion;nuclear inner membrane;nuclear outer membrane;nucleoplasm;nucleus;perinuclear region of cytoplasm;	transporter		16	0	0	1	0	0	0
BREAST	NM_003410	ZFX	7543	P17010	Zinc finger X-chromosomal protein;ZFX	SUBFAMILY NOT NAMED (PTHR24387:SF86)	DNA binding;metal ion binding;transcription coactivator activity;zinc ion binding;	regulation of transcription, DNA-dependent;	intracellular;nucleolus;nucleus;	KRAB box transcription factor		15	1	1	0	0	0	0
BREAST	NM_031407	HUWE1	10075	Q7Z6Z7	E3 ubiquitin-protein ligase HUWE1;HUWE1	E3 UBIQUITIN PROTEIN LIGASE URE-B1 (PTHR11254:SF67)	DNA binding;acid-amino acid ligase activity;ligase activity;protein binding;ubiquitin-protein ligase activity;	base-excision repair;cell differentiation;histone ubiquitination;protein modification process;protein monoubiquitination;protein polyubiquitination;protein ubiquitination involved in ubiquitin-dependent protein catabolic process;	cytoplasm;intracellular;nucleolus;nucleus;	ubiquitin-protein ligase	Ubiquitin proteasome pathway->Ubiquitin protein ligase E3;;	15	5	1	8	0	3	0
BREAST	NM_006399	BATF	10538	Q16520	Basic leucine zipper transcriptional factor ATF-like;BATF	B-ATF (PTHR23351:SF14)	protein binding;protein dimerization activity;sequence-specific DNA binding;sequence-specific DNA binding transcription factor activity;	regulation of transcription, DNA-dependent;transcription, DNA-dependent;	nucleus;	CREB transcription factor		13	4	0	5	0	0	0
BREAST	NM_014006	SMG1	23049	Q96Q15	Serine/threonine-protein kinase SMG1;SMG1	SUBFAMILY NOT NAMED (PTHR11139:SF18)	ATP binding;metal ion binding;nucleotide binding;protein binding;protein kinase activity;protein serine/threonine kinase activity;	DNA repair;mRNA export from nucleus;nuclear-transcribed mRNA catabolic process, nonsense-mediated decay;peptidyl-serine phosphorylation;phosphatidylinositol phosphorylation;protein autophosphorylation;response to stress;	cytoplasm;nucleus;	nucleotide kinase		13	0	0	2	0	0	1
BREAST	NM_014372	RNF11	26994	Q9Y3C5	RING finger protein 11;RNF11	RING FINGER PROTEIN 11 (PTHR22764:SF6)	DNA binding;metal ion binding;protein binding;zinc ion binding;	protein ubiquitination involved in ubiquitin-dependent protein catabolic process;	cytoplasm;nucleus;ubiquitin ligase complex;	zinc finger transcription factor		13	1	1	5	0	10	0
BREAST	NM_000759	CSF3	1440	P09919	Granulocyte colony-stimulating factor;CSF3	GRANULOCYTE COLONY-STIMULATING FACTOR (PTHR10511:SF2)	cytokine activity;enzyme binding;granulocyte colony-stimulating factor receptor binding;growth factor activity;	cytokine-mediated signaling pathway;granulocyte differentiation;immune response;multicellular organismal development;positive regulation of cell proliferation;	extracellular region;extracellular space;	cytokine		12	2	0	0	0	1	0
BREAST	NM_002094	GSPT1	2935	P15170	Eukaryotic peptide chain release factor GTP-binding subunit ERF3A;GSPT1	EUKARYOTIC PEPTIDE CHAIN RELEASE FACTOR GTP-BINDING SUBUNIT (ERF2) (TRANSLATION RELEASE FACTOR 3) (ERF3) (ERF-3) (PTHR23115:SF36)	GTP binding;GTPase activity;nucleotide binding;protein binding;translation release factor activity;	G1/S transition of mitotic cell cycle;GTP catabolic process;activation of caspase activity;nuclear-transcribed mRNA catabolic process, nonsense-mediated decay;protein methylation;protein ubiquitination;regulation of apoptosis;translation;	intracellular;	nucleotidyltransferase		12	2	1	1	0	3	0
BREAST	NM_001001655	ALKBH2	121642	Q6NS38	Alpha-ketoglutarate-dependent dioxygenase alkB homolog 2;ALKBH2		2-oxoglutarate-dependent dioxygenase activity;DNA-N1-methyladenine dioxygenase activity;cytosine C-5 DNA demethylase activity;damaged DNA binding;ferrous iron binding;metal ion binding;oxidoreductase activity;oxidoreductase activity, acting on single donors with incorporation of molecular oxygen, incorporation of two atoms of oxygen;	DNA dealkylation involved in DNA repair;DNA demethylation;DNA repair;oxidative DNA demethylation;oxidative demethylation;	nucleoplasm;nucleus;			11	1	0	0	0	0	0
BREAST	NM_004747	DLG5	9231	Q8TDM6	Disks large homolog 5;DLG5	DISCS, LARGE HOMOLOG 5 (DLG5) (P-DLG) (PTHR13865:SF6)	beta-catenin binding;cytoskeletal protein binding;receptor signaling complex scaffold activity;	cell-cell adhesion;intracellular signal transduction;negative regulation of cell proliferation;regulation of apoptosis;signal transduction;	cell junction;cytoplasm;intracellular;plasma membrane;	tight junction		11	1	0	1	0	1	1
BREAST	NM_012433	SF3B1	23451	O75533	Splicing factor 3B subunit 1;SF3B1	SUBFAMILY NOT NAMED (PTHR12097:SF0)	chromatin binding;protein binding;	RNA splicing;RNA splicing, via transesterification reactions;anterior/posterior pattern formation;gene expression;nuclear mRNA splicing, via spliceosome;	U12-type spliceosomal complex;catalytic step 2 spliceosome;nuclear speck;nucleoplasm;nucleus;spliceosomal complex;	mRNA processing factor		11	1	0	0	0	0	0
BREAST	NM_022804	SNURF	8926	Q9Y675	SNRPN upstream reading frame protein;SNURF	SUBFAMILY NOT NAMED (PTHR14508:SF0)	molecular_function;	biological_process;	nucleus;	transcription cofactor		10	1	0	1	2	2	0
BREAST	NM_012245	SNW1	22938	Q13573	SNW domain-containing protein 1;SNW1	SUBFAMILY NOT NAMED (PTHR12096:SF0)	Notch binding;protein binding;	RNA splicing;gene expression;negative regulation of transcription, DNA-dependent;nuclear mRNA splicing, via spliceosome;regulation of transcription from RNA polymerase II promoter;	catalytic step 2 spliceosome;nuclear part;nucleolus;nucleoplasm;nucleus;spliceosomal complex;	transcription factor		9	2	0	3	0	2	0
BREAST	NM_016291	IP6K2	51447	Q9UHH9	inositol hexakisphosphate kinase 2		ATP binding;inositol hexakisphosphate 5-kinase activity;inositol or phosphatidylinositol kinase activity;inositol trisphosphate 3-kinase activity;nucleotide binding;transferase activity;	cytokine-mediated signaling pathway;negative regulation of cell growth;phosphatidylinositol phosphorylation;positive regulation of apoptosis;type I interferon-mediated signaling pathway;	intermediate filament cytoskeleton;intracellular membrane-bounded organelle;nucleus;			9	0	0	4	2	0	0
BREAST	NM_020886	USP28	57646	Q96RU2	Ubiquitin carboxyl-terminal hydrolase 28;USP28	SUBFAMILY NOT NAMED (PTHR24006:SF2)	cysteine-type peptidase activity;peptidase activity;protein binding;ubiquitin thiolesterase activity;ubiquitin-specific protease activity;	DNA damage checkpoint;DNA damage response, signal transduction by p53 class mediator resulting in induction of apoptosis;DNA repair;cell proliferation;protein deubiquitination;response to ionizing radiation;ubiquitin-dependent protein catabolic process;	nucleolus;nucleoplasm;nucleus;	cysteine protease		9	2	1	5	0	2	0
BREAST	NM_001088	AANAT	15	Q16613	Serotonin N-acetyltransferase;AANAT	SEROTONIN N-ACETYLTRANSFERASE (PTHR10908:SF0)	acyltransferase activity;aralkylamine N-acetyltransferase activity;arylamine N-acetyltransferase activity;transferase activity;	cellular nitrogen compound metabolic process;circadian rhythm;hormone biosynthetic process;melatonin biosynthetic process;metabolic process;response to cAMP;response to calcium ion;response to copper ion;response to corticosterone stimulus;response to cytokine stimulus;response to insulin stimulus;response to light stimulus;response to organic cyclic compound;response to prostaglandin E stimulus;…	cytoplasm;cytosol;	acetyltransferase		8	1	0	1	1	2	0
BREAST	NM_032353	VPS25	84313	Q9BRG1	Vacuolar protein-sorting-associated protein 25;VPS25	SUBFAMILY NOT NAMED (PTHR13149:SF0)	0	cellular membrane organization;endosome transport;protein transport;regulation of transcription, DNA-dependent;	cytoplasm;cytosol;endosome;endosome membrane;membrane;mitochondrion;nucleoplasm;nucleus;			8	4	0	0	0	0	0
BREAST	NM_016570	ERGIC2	51290	Q96RQ1	Endoplasmic reticulum-Golgi intermediate compartment protein 2;ERGIC2	ENDOPLASMIC RETICULUM-GOLGI INTERMEDIATE COMPARTMENT PROTEIN 2 (PTHR10984:SF5)	0	vesicle-mediated transport;	ER-Golgi intermediate compartment membrane;Golgi apparatus;cytoplasm;endoplasmic reticulum;endoplasmic reticulum membrane;integral to membrane;membrane;nucleus;			7	3	0	0	0	1	0
BREAST	NM_020865	DHX36	170506	Q9H2U1	Probable ATP-dependent RNA helicase DHX36;DHX36	SUBFAMILY NOT NAMED (PTHR18934:SF68)	ATP binding;ATP-dependent helicase activity;helicase activity;hydrolase activity;nucleic acid binding;nucleotide binding;protein binding;	0	cytoplasm;nucleus;	RNA helicase		7	0	0	1	0	0	0
BREAST	NM_001016	RPS12	6206	P25398	40S ribosomal protein S12;RPS12	SUBFAMILY NOT NAMED (PTHR11843:SF0)	molecular_function;structural constituent of ribosome;	cellular protein metabolic process;endocrine pancreas development;gene expression;translation;translational elongation;translational termination;viral infectious cycle;viral reproduction;viral transcription;	cytoplasm;cytosol;cytosolic small ribosomal subunit;intracellular;ribosome;	ribosomal protein		6	1	0	1	0	1	0
BREAST	NM_001666	ARHGAP4	393	P98171	Rho GTPase-activating protein 4;ARHGAP4	RHO GTPASE ACTIVATING PROTEIN 4 (PTHR14166:SF3)	GTPase activator activity;Rho GTPase activator activity;Rho guanyl-nucleotide exchange factor activity;SH3/SH2 adaptor activity;guanyl-nucleotide exchange factor activity;protein binding;	Rho protein signal transduction;apoptosis;cytoskeleton organization;induction of apoptosis by extracellular signals;nerve growth factor receptor signaling pathway;positive regulation of GTPase activity;positive regulation of Rho GTPase activity;regulation of small GTPase mediated signal transduction;signal transduction;small GTPase mediated signal transduction;	cytoplasm;cytosol;focal adhesion;intracellular;nucleolus;nucleus;	G-protein modulator	PDGF signaling pathway->GTPase-activating protein Rho;;	6	1	0	2	1	2	1
BREAST	NM_005460	SNCAIP	9627	Q9Y6H5	Synphilin-1;SNCAIP	SUBFAMILY NOT NAMED (PTHR22882:SF2)	protein binding;ubiquitin protein ligase binding;	cell death;dopamine metabolic process;regulation of inclusion body assembly;regulation of neurotransmitter secretion;	cytoplasm;neuronal cell body;nucleolus;nucleus;presynaptic membrane;		Parkinson disease->Synphilin;;	6	0	0	0	0	0	0
BREAST	NM_006444	SMC2	10592	O95347	Structural maintenance of chromosomes protein 2;SMC2	STRUCTURAL MAINTENANCE OF CHROMOSOMES SMC2 (PTHR18937:SF9)	ATP binding;nucleotide binding;protein binding;protein heterodimerization activity;	cell cycle;cell division;mitosis;mitotic chromosome condensation;symbiosis, encompassing mutualism through parasitism;	condensed chromosome;condensin complex;cytoplasm;nuclear chromosome;nucleus;	chromatin/chromatin-binding protein		6	0	0	0	0	1	0
BREAST	NM_173082	SHPRH	257218	Q149N8	E3 ubiquitin-protein ligase SHPRH;SHPRH	E3 UBIQUITIN-PROTEIN LIGASE SHPRH (SNF2, HISTONE-LINKER, PHD AND RING FINGER DOMAIN-CONTAINING HELICASE) (PTHR10799:SF59)	ATP binding;DNA binding;helicase activity;hydrolase activity;ligase activity;metal ion binding;nucleotide binding;zinc ion binding;	DNA repair;nucleosome assembly;	nucleosome;nucleus;	DNA helicase		6	0	0	0	1	0	0
BREAST	NM_003143	SSBP1	6742	Q04837	Single-stranded DNA-binding protein, mitochondrial;SSBP1	SINGLE-STRANDED DNA-BINDING PROTEIN (PTHR10302:SF0)	DNA binding;single-stranded DNA binding;	DNA replication;mitochondrion morphogenesis;positive regulation of helicase activity;	mitochondrial nucleoid;mitochondrion;	DNA binding protein		5	0	0	1	1	1	0
BREAST	NM_003754	EIF3F	8665	O00303	Eukaryotic translation initiation factor 3 subunit F;EIF3F	EUKARYOTIC TRANSLATION INITIATION FACTOR 3 SUBUNIT F (PTHR10540:SF6)	protein binding;translation initiation factor activity;	cellular protein metabolic process;gene expression;translation;translational initiation;	cytoplasm;cytosol;eukaryotic translation initiation factor 3 complex;	translation factor	Cell cycle->Proteasome;;Ubiquitin proteasome pathway->26S proteasome;;;	5	1	0	1	0	0	2
BREAST	NM_016352	CPA4	51200	Q9UI42	Carboxypeptidase A4;CPA4	CARBOXYPEPTIDASE A4 (PTHR11705:SF14)	metal ion binding;metallocarboxypeptidase activity;metallopeptidase activity;peptidase activity;zinc ion binding;	histone acetylation;proteolysis;	cellular_component;extracellular region;	metalloprotease		5	1	0	0	0	0	0
BREAST	XM_290809	TAF4B	6875	Q92750	Transcription initiation factor TFIID subunit 4B;TAF4B	SUBFAMILY NOT NAMED (PTHR15138:SF8)	DNA binding;NF-kappaB binding;sequence-specific DNA binding transcription factor activity;	gene expression;regulation of transcription, DNA-dependent;transcription elongation from RNA polymerase II promoter;transcription from RNA polymerase II promoter;transcription initiation from RNA polymerase II promoter;transcription initiation, DNA-dependent;viral reproduction;	cytoplasm;nucleolus;nucleoplasm;nucleus;transcription factor TFIID complex;			5	0	0	2	2	0	1
BREAST	NM_002380	MATN2	4147	O00339	Matrilin-2;MATN2	MATRILIN 2 (PTHR22992:SF17)	calcium ion binding;molecular_function;	biological_process;	extracellular matrix;extracellular region;proteinaceous extracellular matrix;	extracellular matrix glycoprotein		4	0	0	0	0	0	0
BREAST	NM_004210	NEURL	9148	O76050	Neuralized-like protein 1;NEURL	SUBFAMILY NOT NAMED (PTHR12429:SF0)	metal ion binding;zinc ion binding;	lactation;nervous system development;response to external stimulus;sperm axoneme assembly;sperm motility;	cytoplasm;perinuclear region of cytoplasm;plasma membrane;	ubiquitin-protein ligase	Notch signaling pathway->Neuralized;;	4	1	0	1	0	0	0
BREAST	NM_021134	MRPL23	6150	Q16540	39S ribosomal protein L23, mitochondrial;MRPL23	SUBFAMILY NOT NAMED (PTHR12059:SF4)	RNA binding;nucleotide binding;structural constituent of ribosome;	translation;	intracellular;mitochondrial large ribosomal subunit;mitochondrion;ribosome;	ribosomal protein		4	0	0	1	1	1	0
BREAST	NM_024918	DSN1	79980	Q9H410	Kinetochore-associated protein DSN1 homolog;DSN1	SUBFAMILY NOT NAMED (PTHR14778:SF0)	protein binding;	M phase of mitotic cell cycle;cell division;chromosome segregation;mitotic cell cycle;mitotic prometaphase;	MIS12/MIND type complex;chromosome;cytoplasm;cytosol;nucleus;			4	0	0	0	0	0	0
BREAST	NM_177989	ACTL6A	86	O96019	Actin-like protein 6A;ACTL6A	ACTIN-LIKE PROTEIN 6, ACL6 (PTHR11937:SF32)	ATP binding;chromatin binding;	DNA recombination;DNA repair;chromatin remodeling;histone H2A acetylation;histone H4 acetylation;nervous system development;regulation of growth;regulation of transcription, DNA-dependent;signal transduction;	Ino80 complex;NuA4 histone acetyltransferase complex;SWI/SNF complex;npBAF complex;nucleus;plasma membrane;	actin and actin related protein		4	1	0	3	0	0	0
BREAST	NM_003451	ZNF177	7730	Q13360	Zinc finger protein 177;ZNF177	SUBFAMILY NOT NAMED (PTHR24381:SF381)	0	0	0	KRAB box transcription factor		3	0	0	0	0	0	0
BREAST	NM_004255	COX5A	9377	P20674	Cytochrome c oxidase subunit 5A, mitochondrial;COX5A	CYTOCHROME C OXIDASE POLYPEPTIDE VA (PTHR14200:SF7)	cytochrome-c oxidase activity;electron carrier activity;metal ion binding;	respiratory electron transport chain;	membrane;mitochondrial inner membrane;mitochondrion;	oxidase		3	1	0	1	0	0	0
BREAST	NM_005870	SAP18	10284	O00422	Histone deacetylase complex subunit SAP18;SAP18	SUBFAMILY NOT NAMED (PTHR13082:SF0)	protein binding;transcription corepressor activity;	regulation of transcription from RNA polymerase II promoter;	cytoplasm;histone deacetylase complex;nucleolus;nucleus;plasma membrane;	chromatin/chromatin-binding protein	Hedgehog signaling pathway->Sap18;;	3	0	0	0	0	0	0
BREAST	NM_006503	PSMC4	5704	P43686	26S protease regulatory subunit 6B;PSMC4	26S PROTEASE REGULATORY SUBUNIT 6B (PTHR23073:SF8)	ATP binding;ATPase activity;hydrolase activity;nucleotide binding;protein binding;	ATP catabolic process;DNA damage response, signal transduction by p53 class mediator resulting in cell cycle arrest;G1/S transition of mitotic cell cycle;M/G1 transition of mitotic cell cycle;RNA metabolic process;S phase of mitotic cell cycle;anaphase-promoting complex-dependent proteasomal ubiquitin-dependent protein catabolic process;apoptosis;blastocyst development;cell cycle checkpoint;cellu…	cytoplasm;mitochondrion;nucleolus;nucleus;proteasome complex;	hydrolase	Ubiquitin proteasome pathway->19S proteasome;;Ubiquitin proteasome pathway->26S proteasome;;;	3	0	0	0	0	2	0
BREAST	NM_015455	CNOT6	57472	Q9ULM6	CCR4-NOT transcription complex subunit 6;CNOT6	CARBON CATABOLITE REPRESSOR PROTEIN 4 (PTHR12121:SF13)	RNA binding;exonuclease activity;hydrolase activity;metal ion binding;protein binding;	RNA metabolic process;mRNA metabolic process;nuclear-transcribed mRNA catabolic process, deadenylation-dependent decay;nuclear-transcribed mRNA poly(A) tail shortening;regulation of transcription, DNA-dependent;	cytoplasm;cytosol;nucleus;	exoribonuclease		3	0	0	0	0	0	0
BREAST	NM_021198	CTDSP1	58190	Q9GZU7	Carboxy-terminal domain RNA polymerase II polypeptide A small phosphatase 1;CTDSP1	NUCLEAR LIM INTERACTOR-INTERACTING FACTOR-RELATED (PTHR12210:SF12)	CTD phosphatase activity;hydrolase activity;metal ion binding;phosphoprotein phosphatase activity;protein binding;	protein dephosphorylation;regulation of transcription from RNA polymerase II promoter;	nucleus;			3	0	0	0	0	0	1
BREAST	NM_080819	GPR78	27201	Q96P69	Probable G-protein coupled receptor 78;GPR78	SUBFAMILY NOT NAMED (PTHR24245:SF61)	G-protein coupled receptor activity;receptor activity;	activation of adenylate cyclase activity by G-protein signaling pathway;	integral to membrane;plasma membrane;	G-protein coupled receptor		3	1	0	1	0	0	0
BREAST	NM_194247	HNRNPA3	220988	P51991	Heterogeneous nuclear ribonucleoprotein A3;HNRNPA3	SUBFAMILY NOT NAMED (PTHR24012:SF13)	RNA binding;nucleotide binding;protein binding;	RNA splicing;gene expression;nuclear mRNA splicing, via spliceosome;	catalytic step 2 spliceosome;nucleolus;nucleoplasm;nucleus;ribonucleoprotein complex;	replication origin binding protein		3	0	0	0	0	0	0
BREAST	NM_000816	GABRG2	2566	P18507	Gamma-aminobutyric acid receptor subunit gamma-2;GABRG2	SUBFAMILY NOT NAMED (PTHR18945:SF224)	GABA-A receptor activity;benzodiazepine receptor activity;chloride channel activity;extracellular ligand-gated ion channel activity;ion channel activity;protein binding;	gamma-aminobutyric acid signaling pathway;ion transmembrane transport;synaptic transmission;transmembrane transport;transport;	cell junction;chloride channel complex;integral to plasma membrane;plasma membrane;postsynaptic membrane;synapse;	ligand-gated ion channel		2	0	0	1	0	0	0
BREAST	NM_001070	TUBG1	7283	P23258	Tubulin gamma-1 chain;TUBG1	TUBULIN GAMMA CHAIN (PTHR11588:SF7)	GTP binding;GTPase activity;nucleotide binding;protein binding;structural constituent of cytoskeleton;	G2/M transition of mitotic cell cycle;meiotic spindle organization;microtubule cytoskeleton organization;mitotic cell cycle;protein polymerization;	apical part of cell;cell leading edge;centriole;centrosome;condensed nuclear chromosome;cytoplasm;cytoplasmic microtubule;cytoskeleton;cytosol;gamma-tubulin complex;pericentriolar material;polar microtubule;	tubulin		2	0	1	0	0	1	0
BREAST	NM_001264	CDSN	1041	Q15517	Corneodesmosin;CDSN	SUBFAMILY NOT NAMED (PTHR23207:SF0)	protein homodimerization activity;	cell adhesion;cell-cell adhesion;epidermis development;keratinocyte differentiation;skin morphogenesis;	cell-cell junction;cornified envelope;desmosome;extracellular region;			2	0	1	0	0	0	0
BREAST	NM_002157	HSPE1	3336	P61604	10 kDa heat shock protein, mitochondrial;HSPE1	10 KDA HEAT SHOCK PROTEIN (PTHR10772:SF0)	ATP binding;chaperone binding;protein binding;unfolded protein binding;	activation of caspase activity;protein folding;response to unfolded protein;	cytoplasm;mitochondrial matrix;mitochondrion;	chaperonin		2	0	0	1	0	0	0
BREAST	NM_006859	LIAS	11019	O43766	Lipoyl synthase, mitochondrial;LIAS	LIPOYL SYNTHASE (PTHR10949:SF0)	4 iron, 4 sulfur cluster binding;lipoate synthase activity;metal ion binding;transferase activity;	inflammatory response;lipoate biosynthetic process;neural tube closure;response to lipopolysaccharide;response to oxidative stress;	mitochondrion;	transferase	Lipoate_biosynthesis->Lipoate synthase;;	2	1	0	1	0	0	0
BREAST	NM_006942	SOX15	6665	O60248	SOX-15 protein;SOX15	SOX-15 PROTEIN (PTHR10270:SF45)	DNA binding;chromatin binding;sequence-specific DNA binding transcription factor activity;	cell differentiation;chromatin organization;male gonad development;myoblast development;negative regulation of striated muscle tissue development;negative regulation of transcription from RNA polymerase II promoter;positive regulation of transcription from RNA polymerase II promoter;regulation of transcription from RNA polymerase II promoter;regulation of transcription, DNA-dependent;skeletal mus…	cytoplasm;nucleus;	HMG box transcription factor		2	2	0	0	0	0	0
BREAST	NM_012205	HAAO	23498	P46952	3-hydroxyanthranilate 3,4-dioxygenase;HAAO	SUBFAMILY NOT NAMED (PTHR15497:SF0)	3-hydroxyanthranilate 3,4-dioxygenase activity;electron carrier activity;ferrous iron binding;metal ion binding;oxidoreductase activity;oxygen binding;	cellular nitrogen compound metabolic process;neuron homeostasis;pyridine nucleotide biosynthetic process;quinolinate biosynthetic process;response to cadmium ion;response to zinc ion;tryptophan catabolic process;	cytoplasm;cytosol;mitochondrial membrane;soluble fraction;			2	0	0	0	1	0	0
BREAST	NM_015465	GEMIN5	25929	Q8TEQ6	Gem-associated protein 5;GEMIN5	GEM-ASSOCIATED PROTEIN 5 (GEMIN5) (PTHR22850:SF3)	protein binding;snRNA binding;	RNA metabolic process;RNA splicing;ncRNA metabolic process;nuclear mRNA splicing, via spliceosome;protein complex assembly;spliceosomal snRNP assembly;	Cajal body;cytoplasm;cytosol;nuclear body;nucleoplasm;nucleus;spliceosomal complex;	receptor		2	0	0	0	0	1	0
BREAST	NM_017900	AURKAIP1	54998	Q9NWT8	Aurora kinase A-interacting protein;AURKAIP1	SUBFAMILY NOT NAMED (PTHR16250:SF0)	protein binding;	negative regulation of mitosis;positive regulation of proteolysis;	intracellular membrane-bounded organelle;mitochondrion;nucleolus;nucleus;			2	0	0	2	0	0	0
BREAST	NM_024411	PDYN	5173	P01213	Leumorphin;PDYN	PROENKEPHALIN B (PREPRODYNORPHIN) (PTHR11438:SF4)	opioid peptide activity;	cell death;neuropeptide signaling pathway;synaptic transmission;	extracellular region;plasma membrane;	neuropeptide		2	0	0	0	0	0	0
BREAST	NM_031205	CABP1	9478	Q9NZU7	Calcium-binding protein 1;CABP1	CALCIUM-BINDING PROTEIN (CABP) (PTHR23050:SF21)	calcium ion binding;calcium-dependent protein binding;enzyme inhibitor activity;protein binding;	negative regulation of catalytic activity;	Golgi apparatus;cell cortex;cell junction;cytoplasm;cytoskeleton;dendrite;neuronal cell body;nucleus;perinuclear region of cytoplasm;plasma membrane;postsynaptic density;postsynaptic membrane;synapse;	calmodulin		2	0	0	0	0	0	0
BREAST	NM_153764	KCNJ1	3758	P48048	ATP-sensitive inward rectifier potassium channel 1;KCNJ1	ATP-SENSITIVE INWARD RECTIFIER POTASSIUM CHANNEL 1 (KIR1.1) (PTHR11767:SF6)	ATP binding;inward rectifier potassium channel activity;nucleotide binding;voltage-gated ion channel activity;	excretion;ion transport;potassium ion transport;	integral to membrane;membrane;voltage-gated potassium channel complex;	potassium channel		2	0	0	0	0	1	0
BREAST	NM_000938	POLR2B	5431	P30876	DNA-directed RNA polymerase II subunit RPB2;POLR2B	DNA-DIRECTED RNA POLYMERASE II SUBUNIT 2 (PTHR20856:SF7)	DNA binding;DNA-directed RNA polymerase activity;metal ion binding;nucleotidyltransferase activity;protein binding;protein kinase activity;ribonucleoside binding;transferase activity;	DNA repair;RNA splicing;gene expression;mRNA capping;nuclear mRNA splicing, via spliceosome;nucleotide-excision repair;positive regulation of viral transcription;protein phosphorylation;transcription elongation from RNA polymerase II promoter;transcription from RNA polymerase II promoter;transcription initiation from RNA polymerase II promoter;transcription-coupled nucleotide-excision repair;vira…	DNA-directed RNA polymerase II, core complex;nucleoplasm;nucleus;	nucleotidyltransferase		1	0	0	0	0	0	0
BREAST	NM_000940	PON3	5446	Q15166	Serum paraoxonase/lactonase 3;PON3	SUBFAMILY NOT NAMED (PTHR11799:SF0)	aryldialkylphosphatase activity;arylesterase activity;hydrolase activity;metal ion binding;protein homodimerization activity;	aromatic compound catabolic process;carboxylic acid catabolic process;response to external stimulus;	extracellular region;extracellular space;microsome;	peroxidase		1	0	0	0	0	0	0
BREAST	NM_001001790	TOMM5	401505	Q8N4H5	translocase of outer mitochondrial membrane 5		protein transporter activity;	protein targeting to mitochondrion;	integral to membrane;membrane;mitochondrial outer membrane translocase complex;mitochondrion;			1	0	0	0	0	1	0
BREAST	NM_002541	OGDH	4967	Q02218	2-oxoglutarate dehydrogenase E1 component, mitochondrial;OGDH	SUBFAMILY NOT NAMED (PTHR23152:SF0)	oxidoreductase activity;oxoglutarate dehydrogenase (NAD+) activity;oxoglutarate dehydrogenase (succinyl-transferring) activity;thiamine pyrophosphate binding;	cellular nitrogen compound metabolic process;cerebellar cortex development;generation of precursor metabolites and energy;glycolysis;hippocampus development;lysine catabolic process;olfactory bulb mitral cell layer development;pyramidal neuron development;striatum development;tangential migration from the subventricular zone to the olfactory bulb;thalamus development;tricarboxylic acid cycle;	mitochondrial matrix;mitochondrial membrane;mitochondrion;	dehydrogenase	TCA cycle->alphaketoglutarate Dehydrogenase;;	1	0	0	0	0	0	0
BREAST	NM_002692	POLE2	5427	P56282	DNA polymerase epsilon subunit 2;POLE2	SUBFAMILY NOT NAMED (PTHR12708:SF0)	DNA binding;DNA-directed DNA polymerase activity;nucleotidyltransferase activity;transferase activity;	DNA repair;DNA replication;DNA-dependent DNA replication initiation;G1/S transition of mitotic cell cycle;M/G1 transition of mitotic cell cycle;S phase of mitotic cell cycle;mitotic cell cycle;nucleotide-excision repair;nucleotide-excision repair, DNA gap filling;telomere maintenance;telomere maintenance via recombination;telomere maintenance via semi-conservative replication;transcription-couple…	intracellular membrane-bounded organelle;nucleolus;nucleoplasm;nucleus;	DNA-directed DNA polymerase		1	0	0	0	0	0	0
BREAST	NM_002815	PSMD11	5717	O00231	26S proteasome non-ATPase regulatory subunit 11;PSMD11	26S PROTEASOME NON-ATPASE REGULATORY SUBUNIT 11 (26S PROTEASOME REGULATORY SUBUNIT S9) (PTHR10678:SF2)	protein binding;	DNA damage response, signal transduction by p53 class mediator resulting in cell cycle arrest;G1/S transition of mitotic cell cycle;M/G1 transition of mitotic cell cycle;RNA metabolic process;S phase of mitotic cell cycle;anaphase-promoting complex-dependent proteasomal ubiquitin-dependent protein catabolic process;apoptosis;cell cycle checkpoint;cellular nitrogen compound metabolic process;mRNA …	proteasome complex;		Cell cycle->Proteasome;;Ubiquitin proteasome pathway->26S proteasome;;;	1	0	0	0	0	1	0
BREAST	NM_003446	ZNF157	7712	P51786	Zinc finger protein 157;ZNF157	SUBFAMILY NOT NAMED (PTHR24377:SF291)	DNA binding;metal ion binding;sequence-specific DNA binding transcription factor activity;zinc ion binding;	negative regulation of transcription from RNA polymerase II promoter;transcription, DNA-dependent;	intracellular;nucleus;	KRAB box transcription factor		1	0	0	0	0	0	0
BREAST	NM_005337	NCKAP1L	3071	P55160	Nck-associated protein 1-like;NCKAP1L	SUBFAMILY NOT NAMED (PTHR12093:SF3)	Rac GTPase activator activity;protein binding;protein complex binding;protein kinase activator activity;	B cell homeostasis;B cell receptor signaling pathway;T cell homeostasis;actin polymerization-dependent cell motility;cortical actin cytoskeleton organization;erythrocyte development;maintenance of cell polarity;myeloid cell homeostasis;negative regulation of apoptosis;negative regulation of interleukin-17 production;negative regulation of interleukin-6 production;negative regulation of myosin-lig…	SCAR complex;cytosol;integral to plasma membrane;membrane fraction;plasma membrane;			1	1	0	0	0	0	0
BREAST	NM_006082	TUBA1B	10376	P68363	Tubulin alpha-1B chain;TUBA1B	TUBULIN ALPHA CHAIN (PTHR11588:SF10)	GTP binding;GTPase activity;nucleotide binding;protein binding;structural constituent of cytoskeleton;	'de novo' posttranslational protein folding;cellular protein metabolic process;microtubule cytoskeleton organization;microtubule-based movement;protein folding;protein polymerization;	cytoplasm;cytoskeleton;microtubule;	tubulin		1	1	0	0	0	0	0
BREAST	NM_007362	NCBP2	22916	P52298	Nuclear cap-binding protein subunit 2;NCBP2	SUBFAMILY NOT NAMED (PTHR18847:SF0)	RNA 7-methylguanosine cap binding;RNA binding;RNA cap binding;nucleotide binding;protein binding;	RNA metabolic process;RNA splicing;gene expression;gene silencing by RNA;histone mRNA metabolic process;mRNA 3'-end processing;mRNA capping;mRNA export from nucleus;mRNA processing;ncRNA metabolic process;nuclear mRNA splicing, via spliceosome;nuclear-transcribed mRNA catabolic process, nonsense-mediated decay;positive regulation of RNA export from nucleus;positive regulation of viral transcripti…	cytoplasm;cytosol;mRNA cap binding complex;nucleoplasm;nucleus;	RNA binding protein		1	1	0	0	0	1	0
BREAST	NM_016057	COPZ1	22818	P61923	Coatomer subunit zeta-1;COPZ1	SUBFAMILY NOT NAMED (PTHR11043:SF0)	0	COPI coating of Golgi vesicle;cellular membrane organization;intra-Golgi vesicle-mediated transport;intracellular protein transport;retrograde vesicle-mediated transport, Golgi to ER;vesicle-mediated transport;	COPI vesicle coat;Golgi apparatus;Golgi membrane;cytoplasm;cytoplasmic vesicle;cytosol;membrane;membrane coat;	vesicle coat protein		1	1	0	0	0	0	0
BREAST	NM_016485	VTA1	51534	Q9NP79	Vacuolar protein sorting-associated protein VTA1 homolog;VTA1	SUBFAMILY NOT NAMED (PTHR12741:SF4)	protein binding;	cellular membrane organization;endosome transport;protein transport;	cytoplasm;cytosol;endosome;endosome membrane;membrane;			1	1	0	0	0	0	0
BREAST	NM_018904	PCDHA13	56136	Q9Y5I0	protocadherin alpha 13		calcium ion binding;	cell adhesion;homophilic cell adhesion;	integral to membrane;plasma membrane;			1	0	0	0	0	0	0
BREAST	NM_020123	TM9SF3	56889	Q9HD45	Transmembrane 9 superfamily member 3;TM9SF3	TRANSMEMBRANE 9 SUPERFAMILY PROTEIN MEMBER 3 (PTHR10766:SF6)	binding;	0	integral to membrane;membrane;	transporter		1	1	0	0	0	1	0
BREAST	NM_020143	PNO1	56902	Q9NRX1	RNA-binding protein PNO1;PNO1	SUBFAMILY NOT NAMED (PTHR12826:SF4)	RNA binding;	0	nucleolus;nucleus;			1	0	0	0	0	0	0
BREAST	NM_020737	LRFN2	57497	Q9ULH4	Leucine-rich repeat and fibronectin type-III domain-containing protein 2;LRFN2	SUBFAMILY NOT NAMED (PTHR24373:SF38)	0	0	cell junction;integral to membrane;plasma membrane;postsynaptic membrane;synapse;	receptor		1	0	0	1	0	0	0
BREAST	NM_024545	SAP130	79595	Q9H0E3	Histone deacetylase complex subunit SAP130;SAP130	SUBFAMILY NOT NAMED (PTHR13497:SF0)	histone acetyltransferase activity;transcription coactivator activity;	histone H3 acetylation;regulation of transcription, DNA-dependent;	STAGA complex;nucleus;	nucleic acid binding		1	0	0	0	0	0	0
BREAST	NM_032704	TUBA1C	84790	Q9BQE3	Tubulin alpha-1C chain;TUBA1C	TUBULIN ALPHA CHAIN (PTHR11588:SF10)	GTP binding;GTPase activity;nucleotide binding;protein binding;structural molecule activity;	'de novo' posttranslational protein folding;cellular protein metabolic process;microtubule-based movement;protein folding;protein polymerization;	cytoplasm;cytoskeleton;microtubule;	tubulin		1	0	0	0	0	0	0
BREAST	NM_178422	PAQR7	164091	Q86WK9	Membrane progestin receptor alpha;PAQR7	SUBFAMILY NOT NAMED (PTHR20855:SF16)	receptor activity;steroid binding;	cell differentiation;multicellular organismal development;oogenesis;	integral to membrane;plasma membrane;	G-protein coupled receptor		1	0	0	0	1	1	0
BREAST	NM_000387	SLC25A20	788	O43772	Mitochondrial carnitine/acylcarnitine carrier protein;SLC25A20	SUBFAMILY NOT NAMED (PTHR24089:SF61)	acyl carnitine transporter activity;	acyl carnitine transport;carnitine shuttle;cellular lipid metabolic process;regulation of fatty acid oxidation;transport;	integral to membrane;membrane;mitochondrial inner membrane;mitochondrion;	amino acid transporter		0	0	0	0	0	0	0
BREAST	NM_001007033	CLEC6A	93978	Q6EIG7	C-type lectin domain family 6 member A;CLEC6A	C-TYPE LECTIN (PTHR22802:SF10)	binding;sugar binding;	defense response to fungus;innate immune response;positive regulation of I-kappaB kinase/NF-kappaB cascade;positive regulation of cytokine secretion;	integral to membrane;membrane;	immunoglobulin receptor superfamily		0	0	0	0	0	0	0
BREAST	NM_001472	GAGE2C	2574	Q13066	G antigen 2C		0	0	0			0	0	0	0	0	0	0
BREAST	NM_001661	ARL4D	379	P49703	ADP-ribosylation factor-like protein 4D;ARL4D	ADP-RIBOSYLATION FACTOR-LIKE 4, ARL4 (PTHR11711:SF28)	GTP binding;GTPase activity;nucleotide binding;protein binding;	GTP catabolic process;protein secretion;small GTPase mediated signal transduction;	cytoplasm;intracellular;nucleolus;nucleus;plasma membrane;	hydrolase	Huntington disease->ADP-ribosylation factor;;	0	0	0	0	0	0	0
BREAST	NM_002806	PSMC6	5706	P62333	26S protease regulatory subunit S10B;PSMC6	26S PROTEASE REGULATORY SUBUNIT S10B (PTHR23073:SF10)	ATP binding;ATPase activity;hydrolase activity;nucleotide binding;protein binding;protein binding, bridging;	ATP catabolic process;DNA damage response, signal transduction by p53 class mediator resulting in cell cycle arrest;G1/S transition of mitotic cell cycle;M/G1 transition of mitotic cell cycle;RNA metabolic process;S phase of mitotic cell cycle;anaphase-promoting complex-dependent proteasomal ubiquitin-dependent protein catabolic process;apoptosis;cell cycle checkpoint;cellular nitrogen compound m…	cytoplasm;nucleus;proteasome complex;	hydrolase	Ubiquitin proteasome pathway->26S proteasome;;	0	0	0	0	0	0	0
BREAST	NM_004889	ATP5J2	9551	P56134	ATP synthase subunit f, mitochondrial;ATP5J2	SUBFAMILY NOT NAMED (PTHR13080:SF0)	ATPase activity;transmembrane transporter activity;	ATP biosynthetic process;ATP catabolic process;ion transport;mitochondrial ATP synthesis coupled proton transport;proton transport;respiratory electron transport chain;	membrane;mitochondrial inner membrane;mitochondrial proton-transporting ATP synthase complex;mitochondrion;proton-transporting ATP synthase complex, coupling factor F(o);	ATP synthase		0	0	0	0	0	0	0
BREAST	NM_005871	SMNDC1	10285	O75940	Survival of motor neuron-related-splicing factor 30;SMNDC1	SUBFAMILY NOT NAMED (PTHR12664:SF0)	RNA binding;protein binding;	RNA splicing;RNA splicing, via transesterification reactions;apoptosis;induction of apoptosis;mRNA processing;	Cajal body;cytoplasm;nuclear speck;nucleus;spliceosomal complex;	mRNA processing factor		0	0	0	0	0	0	0
BREAST	NM_007080	LSM6	11157	P62312	U6 snRNA-associated Sm-like protein LSm6;LSM6	SUBFAMILY NOT NAMED (PTHR11021:SF0)	RNA binding;protein binding;	RNA metabolic process;RNA splicing;exonucleolytic nuclear-transcribed mRNA catabolic process involved in deadenylation-dependent decay;mRNA metabolic process;mRNA processing;nuclear-transcribed mRNA catabolic process, deadenylation-dependent decay;rRNA processing;tRNA processing;	cytoplasm;cytosol;nucleus;small nuclear ribonucleoprotein complex;	mRNA processing factor		0	0	0	0	0	0	0
BREAST	NM_012458	TIMM13	26517	Q9Y5L4	Mitochondrial import inner membrane translocase subunit Tim13;TIMM13	SUBFAMILY NOT NAMED (PTHR19338:SF0)	metal ion binding;protein binding;zinc ion binding;	protein import into mitochondrial inner membrane;protein targeting to mitochondrion;protein transport;sensory perception of sound;transmembrane transport;	membrane;mitochondrial inner membrane presequence translocase complex;mitochondrial intermembrane space protein transporter complex;mitochondrion;			0	0	0	0	0	0	0
BREAST	NM_014089	NUPL1	9818	Q9BVL2	Nucleoporin p58/p45;NUPL1	SUBFAMILY NOT NAMED (PTHR13437:SF0)	nucleocytoplasmic transporter activity;	carbohydrate metabolic process;glucose transport;hexose transport;mRNA transport;protein transport;regulation of glucose transport;transmembrane transport;viral reproduction;	membrane;nuclear envelope;nuclear membrane;nuclear pore;nucleus;			0	0	0	0	0	0	0
BREAST	NM_014180	MRPL22	29093	Q9NWU5	39S ribosomal protein L22, mitochondrial;MRPL22	SUBFAMILY NOT NAMED (PTHR13501:SF0)	structural constituent of ribosome;	translation;	intracellular;large ribosomal subunit;mitochondrion;	ribosomal protein		0	0	0	0	0	0	0
BREAST	NM_017419	ACCN5	51802	Q9NY37	Amiloride-sensitive cation channel 5;ACCN5	ACID SENSING ION CHANNEL (PTHR11690:SF12)	ion channel activity;ligand-gated sodium channel activity;	ion transport;	integral to membrane;plasma membrane;	ion channel		0	0	0	0	0	0	0
BREAST	NM_017952	PTCD3	55037	Q96EY7	Pentatricopeptide repeat-containing protein 3, mitochondrial;PTCD3	SUBFAMILY NOT NAMED (PTHR16276:SF0)	protein binding;	0	mitochondrion;			0	0	0	0	0	0	0
BREAST	NM_018031	WDR6	11180	Q9NNW5	WD repeat-containing protein 6;WDR6	SUBFAMILY NOT NAMED (PTHR14344:SF3)	insulin receptor substrate binding;protein binding;	cell cycle;cell cycle arrest;negative regulation of cell proliferation;	cytoplasm;signalosome;soluble fraction;			0	0	0	0	0	0	0
BREAST	NM_018097	HAUS2	55142	Q9NVX0	HAUS augmin-like complex, subunit 2		molecular_function;	G2/M transition of mitotic cell cycle;cell division;centrosome organization;mitosis;mitotic cell cycle;spindle assembly;	HAUS complex;centrosome;cytoplasm;cytoskeleton;cytosol;microtubule;spindle;			0	0	0	0	0	0	0
BREAST	NM_018142	INTS10	55174	Q9NVR2	Integrator complex subunit 10;INTS10	SUBFAMILY NOT NAMED (PTHR16055:SF0)	protein binding;	snRNA processing;	integrator complex;nucleus;			0	0	0	0	0	0	0
BREAST	NM_018937	PCDHB3	56132	Q9Y5E6	Protocadherin beta-3;PCDHB3	SUBFAMILY NOT NAMED (PTHR24028:SF94)	calcium ion binding;	calcium-dependent cell-cell adhesion;cell adhesion;homophilic cell adhesion;nervous system development;synapse assembly;synaptic transmission;	integral to membrane;integral to plasma membrane;plasma membrane;	G-protein coupled receptor	Wnt signaling pathway->Cadherin;;Cadherin signaling pathway->Cadherin;;;	0	0	0	0	0	0	0
BREAST	NM_019609	CPXM1	56265	Q96SM3	Probable carboxypeptidase X1;CPXM1	POTENTIAL CARBOXYPEPTIDASE-LIKE PROTEIN X1,X2 (PTHR11532:SF3)	metal ion binding;metallocarboxypeptidase activity;metallopeptidase activity;peptidase activity;zinc ion binding;	cell adhesion;proteolysis;	extracellular region;extracellular space;	metalloprotease		0	0	0	0	0	0	0
BREAST	NM_021826	FASTKD5	60493	Q7L8L6	FAST kinase domain-containing protein 5;FASTKD5	SUBFAMILY NOT NAMED (PTHR21228:SF7)	ATP binding;protein kinase activity;	apoptosis;cellular respiration;	mitochondrion;			0	0	0	0	0	0	0
BREAST	NM_024407	NDUFS7	374291	O75251	NADH dehydrogenase [ubiquinone] iron-sulfur protein 7, mitochondrial;NDUFS7	NADH-PLASTOQUINONE OXIDOREDUCTASE (PTHR11995:SF2)	4 iron, 4 sulfur cluster binding;NADH dehydrogenase (ubiquinone) activity;NADH dehydrogenase activity;metal ion binding;oxidoreductase activity, acting on NADH or NADPH, quinone or similar compound as acceptor;protein binding;quinone binding;	mitochondrial electron transport, NADH to ubiquinone;mitochondrial respiratory chain complex I assembly;respiratory electron transport chain;transport;	mitochondrial inner membrane;mitochondrial respiratory chain complex I;mitochondrion;respiratory chain;	dehydrogenase		0	0	0	0	0	0	0
BREAST	NM_025106	SPSB1	80176	Q96BD6	SPRY domain-containing SOCS box protein 1;SPSB1	SUBFAMILY NOT NAMED (PTHR12245:SF0)	0	intracellular signal transduction;	cytoplasm;			0	0	0	0	0	0	0
BREAST	NM_025196	GRPEL1	80273	Q9HAV7	GrpE protein homolog 1, mitochondrial;GRPEL1	GRPE PROTEIN 1 (PTHR21237:SF9)	adenyl-nucleotide exchange factor activity;chaperone binding;protein homodimerization activity;unfolded protein binding;	protein folding;protein import into mitochondrial matrix;	mitochondrial matrix;mitochondrion;	chaperone		0	0	0	0	0	0	0
BREAST	NM_031210	C14orf156	81892	Q9GZT3	SRA stem-loop-interacting RNA-binding protein, mitochondrial;SLIRP	SUBFAMILY NOT NAMED (PTHR24011:SF30)	RNA binding;nucleotide binding;	regulation of transcription, DNA-dependent;	mitochondrion;nucleus;	mRNA processing factor		0	0	0	0	0	0	0
BREAST	NM_031296	RAB33B	83452	Q9H082	Ras-related protein Rab-33B;RAB33B	SUBFAMILY NOT NAMED (PTHR24073:SF203)	GTP binding;nucleotide binding;	protein transport;small GTPase mediated signal transduction;	Golgi apparatus;Golgi membrane;membrane;	small GTPase		0	0	0	0	0	0	0
BREAST	NM_032424	KIAA1826	84437	Q8NCY6	Coiled-coil domain-containing protein KIAA1826;KIAA1826	SUBFAMILY NOT NAMED (PTHR21732:SF0)	0	0	nucleus;			0	0	0	0	0	0	0
BREAST	NM_033069	C6orf114	85411	Q96JD4	Uncharacterized protein C6orf114;C6orf114		0	0	0			0	0	0	0	0	0	0
BREAST	NM_033082	SARNP	84324	P82979	SAP domain containing ribonucleoprotein		DNA binding;RNA binding;nucleic acid binding;protein binding;	regulation of transcription, DNA-dependent;regulation of translation;	nucleus;			0	0	0	0	0	0	0
BREAST	NM_133457	EMID2	136227	Q96A83	Collagen alpha-1(XXVI) chain;EMID2	SUBFAMILY NOT NAMED (PTHR24023:SF57)	0	0	collagen;extracellular region;	peptide hormone		0	0	0	0	0	0	0
BREAST	NM_133474	ZNF721	170960	Q8TF20	Zinc finger protein 721;ZNF721	SUBFAMILY NOT NAMED (PTHR24384:SF381)	DNA binding;metal ion binding;zinc ion binding;	regulation of transcription, DNA-dependent;	intracellular;nucleus;	KRAB box transcription factor		0	0	0	0	0	0	0
BREAST	NM_138280	CLYBL	171425	Q8N0X4	Citrate lyase subunit beta-like protein, mitochondrial;CLYBL	SUBFAMILY NOT NAMED (PTHR11105:SF0)	carbon-carbon lyase activity;citrate (pro-3S)-lyase activity;metal ion binding;	cellular aromatic compound metabolic process;	citrate lyase complex;mitochondrion;		Pyruvate metabolism->Citrate Lyase;;	0	0	0	0	0	0	0
BREAST	NM_138485	GTPBP8	29083	Q8N3Z3	GTP-binding protein 8;GTPBP8	GB DEF: HSPC135 PROTEIN, ISOFORM 4 (PTHR11649:SF2)	GTP binding;nucleotide binding;	barrier septum formation;	intracellular;mitochondrion;	small GTPase		0	0	0	0	0	0	0
BREAST	NM_144566	ZNF700	90592	Q9H0M5	Zinc finger protein 700;ZNF700	SUBFAMILY NOT NAMED (PTHR24381:SF361)	DNA binding;metal ion binding;zinc ion binding;	regulation of transcription, DNA-dependent;	intracellular;nucleus;	KRAB box transcription factor		0	0	0	0	0	0	0
BREAST	NM_145026	SPATS1	221409	Q496A3	Spermatogenesis-associated serine-rich protein 1;SPATS1		0	0	0			0	0	0	0	0	0	0
BREAST	NM_145062	ZUFSP	221302	Q96AP4	Zinc finger with UFM1-specific peptidase domain protein;ZUFSP	SUBFAMILY NOT NAMED (PTHR11389:SF375)	metal ion binding;zinc ion binding;	0	intracellular;	zinc finger transcription factor		0	0	0	0	0	0	0
BREAST	NM_153376	CCDC96	257236	Q2M329	Coiled-coil domain-containing protein 96;CCDC96	SUBFAMILY NOT NAMED (PTHR15654:SF0)	0	0	0			0	0	0	0	0	0	0
BREAST	NM_181489	ZNF445	353274	P59923	Zinc finger protein 445;ZNF445	SUBFAMILY NOT NAMED (PTHR24385:SF225)	DNA binding;metal ion binding;sequence-specific DNA binding transcription factor activity;zinc ion binding;	viral reproduction;	intracellular;nucleus;	KRAB box transcription factor		0	0	0	0	0	0	0
BREAST	NM_182500	C2orf50	130813	Q96LR7	Uncharacterized protein C2orf50;C2orf50		0	0	0			0	0	0	0	0	0	0
BREAST	NM_182971	COX8C	341947	Q7Z4L0	Cytochrome c oxidase polypeptide 8C, mitochondrial;COX8C	SUBFAMILY NOT NAMED (PTHR16717:SF0)	cytochrome-c oxidase activity;	0	integral to membrane;membrane;mitochondrial inner membrane;mitochondrion;	oxidase		0	0	0	0	0	0	0
BREAST	NM_198468	C6orf167	253714	Q6ZRQ5	Uncharacterized protein C6orf167;C6orf167		protein binding;	DNA repair;double-strand break repair via homologous recombination;replication fork processing;	FACT complex;MCM complex;nuclear replication fork;nucleus;			0	0	0	0	0	0	0
BREAST	NM_198483	RUFY4	285180	Q6ZNE9	RUN and FYVE domain-containing protein 4;RUFY4	GB DEF: HYPOTHETICAL PROTEIN FLJ46536 (PTHR18851:SF1)	metal ion binding;	0	0			0	0	0	0	0	0	0
BREAST	NM_198943	WASH2P	375260	Q6VEQ5	WAS protein family homolog 2;WASH2P	SUBFAMILY NOT NAMED (PTHR23331:SF0)	0	0	0			0	0	0	0	0	0	0
BREAST	XM_373058	LOC391746	391746	#N/A	TAF11 RNA polymerase II, TATA box binding protein (TBP)-associated factor, 28kDa pseudogene		0	0	0			0	0	0	0	0	0	0
OVARIAN	NM_001154	ANXA5*	308	P08758	Annexin A5;ANXA5	ANNEXIN A5 (PTHR10502:SF26)	calcium ion binding;calcium-dependent phospholipid binding;eukaryotic cell surface binding;phospholipase inhibitor activity;phospholipid binding;protein binding;receptor tyrosine kinase binding;	anti-apoptosis;blood coagulation;negative regulation of coagulation;positive regulation of apoptosis;protein homooligomerization;response to organic substance;signal transduction;	cell projection;cytoplasm;intercalated disc;intracellular;sarcolemma;	transfer/carrier protein		1019	249	5	186	24	98	27
OVARIAN	NM_001706	BCL6	604	P41182	B-cell lymphoma 6 protein;BCL6	B CELL LEUKEMIA/LYMPHOMA 6 (PTHR23228:SF26)	chromatin DNA binding;chromatin binding;metal ion binding;protein binding;sequence-specific DNA binding;sequence-specific DNA binding transcription factor activity;zinc ion binding;	B cell differentiation;actin cytoskeleton organization;cell morphogenesis;erythrocyte development;negative regulation of B cell apoptosis;negative regulation of Rho protein signal transduction;negative regulation of S phase of mitotic cell cycle;negative regulation of T-helper 2 cell differentiation;negative regulation of apoptosis;negative regulation of cell differentiation;negative regulation o…	intracellular;nucleolus;nucleus;replication fork;	zinc finger transcription factor		608	62	30	310	2	21	3
OVARIAN	NM_003118	SPARC	6678	P09486	SPARC;SPARC	SUBFAMILY NOT NAMED (PTHR13866:SF6)	calcium ion binding;collagen binding;extracellular matrix binding;protein binding;	blood coagulation;cellular response to growth factor stimulus;ossification;platelet activation;platelet degranulation;regulation of cell proliferation;signal transduction;	basement membrane;extracellular region;extracellular space;platelet alpha granule lumen;proteinaceous extracellular matrix;	growth factor		525	113	8	63	22	60	35
OVARIAN	NM_000237	LPL	4023	P06858	Lipoprotein lipase;LPL	LIPOPROTEIN LIPASE (PTHR11610:SF3)	heparin binding;hydrolase activity;lipoprotein lipase activity;phospholipase activity;protein binding;receptor binding;triglyceride binding;triglyceride lipase activity;	chylomicron remodeling;fatty acid biosynthetic process;lipid catabolic process;lipid metabolic process;lipoprotein metabolic process;phospholipid metabolic process;positive regulation of cholesterol storage;positive regulation of macrophage derived foam cell differentiation;positive regulation of sequestering of triglyceride;response to drug;triglyceride biosynthetic process;triglyceride cataboli…	anchored to membrane;chylomicron;extracellular matrix;extracellular region;extracellular space;plasma membrane;very-low-density lipoprotein particle;	phospholipase	2-arachidonoylglycerol biosynthesis->Diacylglycerol lipase;;	346	30	11	21	2	21	6
OVARIAN	NM_002127	HLA-G	3135	P17693	HLA class I histocompatibility antigen, alpha chain G;HLA-G	MHC CLASS I ANTIGEN (PTHR16675:SF53)	MHC class I receptor activity;	antigen processing and presentation;antigen processing and presentation of peptide antigen via MHC class I;cellular defense response;cytokine-mediated signaling pathway;interferon-gamma-mediated signaling pathway;regulation of immune response;type I interferon-mediated signaling pathway;	MHC class I protein complex;integral to membrane;plasma membrane;	immunoglobulin receptor superfamily		313	16	5	2	22	21	3
OVARIAN	NM_002648	PIM1	5292	P11309	Proto-oncogene serine/threonine-protein kinase Pim-1;PIM1	SUBFAMILY NOT NAMED (PTHR22984:SF0)	ATP binding;manganese ion binding;metal ion binding;nucleotide binding;protein binding;protein serine/threonine kinase activity;transcription factor binding;	cell cycle;cell proliferation;multicellular organismal development;negative regulation of apoptosis;negative regulation of sequence-specific DNA binding transcription factor activity;positive regulation of cyclin-dependent protein kinase activity involved in G1/S;protein autophosphorylation;protein phosphorylation;	cytoplasm;nucleus;plasma membrane;	protein kinase		190	47	5	162	3	4	5
OVARIAN	NM_000448	RAG1	5896	P15918	V(D)J recombination-activating protein 1;RAG1	SUBFAMILY NOT NAMED (PTHR11539:SF0)	DNA binding;acid-amino acid ligase activity;endonuclease activity;histone binding;ligase activity;metal ion binding;protein binding;protein homodimerization activity;sequence-specific DNA binding;ubiquitin-protein ligase activity;zinc ion binding;	B cell differentiation;DNA recombination;T cell differentiation in thymus;V(D)J recombination;chromatin modification;death;histone monoubiquitination;immune response;negative regulation of caspase activity;negative regulation of thymocyte apoptosis;pre-B cell allelic exclusion;protein autoubiquitination;	intracellular;nucleus;	endodeoxyribonuclease		139	16	2	29	3	6	0
OVARIAN	NM_000388	CASR	846	P41180	Extracellular calcium-sensing receptor;CASR	SUBFAMILY NOT NAMED (PTHR24061:SF29)	G-protein coupled receptor activity;phosphatidylinositol phospholipase C activity;receptor activity;	G-protein coupled receptor protein signaling pathway;JNK cascade;anatomical structure morphogenesis;calcium ion import;cellular calcium ion homeostasis;chemosensory behavior;detection of calcium ion;ossification;positive regulation of ATPase activity;positive regulation of cell proliferation;regulation of calcium ion transport;vasodilation;	axon terminus;integral to plasma membrane;plasma membrane;	ligand-gated ion channel		92	25	3	14	2	6	2
OVARIAN	NM_005612	REST	5978	Q13127	RE1-silencing transcription factor;REST	RE1-SILENCING TRANSCRIPTION FACTOR (PTHR10032:SF71)	DNA binding;RNA polymerase II core promoter proximal region sequence-specific DNA binding transcription factor activity involved in negative regulation of transcription;calcium channel activity;chromatin binding;core promoter binding;core promoter proximal region sequence-specific DNA binding;core promoter sequence-specific DNA binding;metal ion binding;outward rectifier potassium channel activit…	calcium ion transmembrane transport;cellular response to drug;cellular response to electrical stimulus;cellular response to glucocorticoid stimulus;histone H4 deacetylation;negative regulation by host of viral transcription;negative regulation of aldosterone biosynthetic process;negative regulation of cell proliferation;negative regulation of cortisol biosynthetic process;negative regulation of g…	chromatin;cytoplasm;intracellular;nucleolus;nucleus;transcriptional repressor complex;	KRAB box transcription factor		66	11	1	10	0	3	0
OVARIAN	NM_001553	IGFBP7	3490	Q16270	Insulin-like growth factor-binding protein 7;IGFBP7	INSULIN-LIKE GROWTH FACTOR BINDING PROTEIN 7 (PTHR14186:SF6)	insulin-like growth factor binding;protein binding;	cell adhesion;negative regulation of cell proliferation;regulation of cell growth;	extracellular matrix;extracellular region;extracellular space;			61	17	5	18	0	10	0
OVARIAN	NM_032415	CARD11	84433	Q9BXL7	Caspase recruitment domain-containing protein 11;CARD11	CASPASE RECRUITMENT DOMAIN PROTEIN 11 (PTHR14559:SF4)	CARD domain binding;guanylate kinase activity;protein binding;	T cell costimulation;T cell receptor signaling pathway;positive regulation of B cell proliferation;positive regulation of I-kappaB kinase/NF-kappaB cascade;positive regulation of NF-kappaB transcription factor activity;positive regulation of T cell proliferation;positive regulation of cytokine production;positive regulation of interleukin-2 biosynthetic process;regulation of B cell differentiatio…	T cell receptor complex;cytoplasm;cytosol;intracellular;membrane raft;plasma membrane;			51	14	1	8	0	3	0
OVARIAN	NM_003202	TCF7	6932	P36402	Transcription factor 7;TCF7	TRANSCRIPTION FACTOR 7 (T-CELL-SPECIFIC TRANSCRIPTION FACTOR 1) (PTHR10373:SF9)	DNA binding;protein binding;transcription regulatory region DNA binding;	Wnt receptor signaling pathway;cellular response to interleukin-4;immune response;regulation of transcription from RNA polymerase II promoter;	nucleus;	nucleic acid binding		43	11	2	12	0	4	0
OVARIAN	NM_001531	MR1	3140	Q8N490	Probable hydrolase PNKD;PNKD	HYDROXYACYLGLUTATHIONE HYDROLASE (PTHR11935:SF7)	MHC class I receptor activity;	antigen processing and presentation;antigen processing and presentation of peptide antigen via MHC class I;immune response;	MHC class I protein complex;endoplasmic reticulum;extracellular region;integral to membrane;plasma membrane;	hydrolase		41	4	0	5	0	5	0
OVARIAN	NM_022739	SMURF2	64750	Q9HAU4	E3 ubiquitin-protein ligase SMURF2;SMURF2	UBIQUITIN-- PROTEIN LIGASE SMURF (PTHR11254:SF84)	SMAD binding;acid-amino acid ligase activity;identical protein binding;ligase activity;protein binding;ubiquitin-protein ligase activity;	BMP signaling pathway;negative regulation of transcription, DNA-dependent;protein modification process;protein ubiquitination;protein ubiquitination involved in ubiquitin-dependent protein catabolic process;regulation of transforming growth factor beta receptor signaling pathway;transforming growth factor beta receptor signaling pathway;ubiquitin-dependent SMAD protein catabolic process;ubiquitin…	cytoplasm;cytosol;intracellular;membrane raft;nucleus;plasma membrane;ubiquitin ligase complex;	ubiquitin-protein ligase	TGF-beta signaling pathway->Smad ubiquitination regulatory factors;;Ubiquitin proteasome pathway->Ubiquitin protein ligase E3;;;	41	8	1	7	1	9	1
OVARIAN	NM_002509	NKX2-2	4821	O95096	Homeobox protein Nkx-2.2;NKX2-2	SUBFAMILY NOT NAMED (PTHR24340:SF176)	chromatin binding;core promoter proximal region DNA binding;sequence-specific DNA binding;transcription coactivator activity;transcription factor binding;	astrocyte differentiation;brain development;digestive tract development;endocrine pancreas development;multicellular organismal development;negative regulation of neuron differentiation;nervous system development;neuron fate specification;oligodendrocyte development;pancreatic A cell fate commitment;pancreatic PP cell fate commitment;positive regulation of neuron differentiation;positive regulati…	intracellular part;nucleus;	homeobox transcription factor		39	5	1	9	0	3	11
OVARIAN	NM_080792	SIRPA	140885	P78324	Tyrosine-protein phosphatase non-receptor type substrate 1;SIRPA	SUBFAMILY NOT NAMED (PTHR19971:SF0)	SH3 domain binding;	blood coagulation;cell adhesion;cell junction assembly;leukocyte migration;	integral to membrane;membrane;plasma membrane;	chemokine		34	9	0	6	0	11	1
OVARIAN	NM_003373	VCL	7414	P18206	Vinculin;VCL	VINCULIN (PTHR18914:SF1)	Rho GTPase binding;actin binding;alpha-catenin binding;beta-catenin binding;beta-dystroglycan binding;cadherin binding;protein binding;structural molecule activity;	adherens junction assembly;apical junction assembly;blood coagulation;cell adhesion;cell-matrix adhesion;cellular component movement;epithelial cell-cell adhesion;lamellipodium assembly;morphogenesis of an epithelium;muscle contraction;negative regulation of cell migration;platelet activation;platelet degranulation;protein localization at cell surface;	actin filament;adherens junction;cell-cell adherens junction;cell-cell junction;cell-substrate junction;costamere;cytoplasm;cytoskeleton;cytosol;extracellular region;fascia adherens;focal adhesion;plasma membrane;protein complex;stress fiber;	non-motor actin binding protein	Integrin signalling pathway->Vinculin;;	31	2	1	2	0	2	1
OVARIAN	NM_012452	TNFRSF13B	23495	O14836	Tumor necrosis factor receptor superfamily member 13B;TNFRSF13B	SUBFAMILY NOT NAMED (PTHR15511:SF0)	protein binding;receptor activity;	B cell homeostasis;cell surface receptor linked signaling pathway;negative regulation of B cell proliferation;	external side of plasma membrane;integral to plasma membrane;membrane;			30	14	1	5	0	0	0
OVARIAN	NM_181755	HSD11B1	3290	P28845	Corticosteroid 11-beta-dehydrogenase isozyme 1;HSD11B1	SUBFAMILY NOT NAMED (PTHR24322:SF34)	11-beta-hydroxysteroid dehydrogenase (NADP+) activity;11-beta-hydroxysteroid dehydrogenase [NAD(P)] activity;binding;oxidoreductase activity;	glucocorticoid biosynthetic process;hormone biosynthetic process;lung development;steroid metabolic process;	endoplasmic reticulum;endoplasmic reticulum membrane;integral to membrane;membrane;	dehydrogenase		30	1	0	0	4	4	0
OVARIAN	NM_004739	MTA2	9219	O94776	Metastasis-associated protein MTA2;MTA2	METASTASIS-ASSOCIATED PROTEIN 2 (MTA2) (PTHR10865:SF4)	histone deacetylase activity;metal ion binding;protein binding;sequence-specific DNA binding;sequence-specific DNA binding transcription factor activity;zinc ion binding;	chromatin assembly or disassembly;negative regulation of transcription from RNA polymerase II promoter;positive regulation of transcription from RNA polymerase II promoter;	NuRD complex;histone deacetylase complex;nucleolus;nucleus;	chromatin/chromatin-binding protein	p53 pathway->Metastasis-associated 2;;	28	7	0	5	3	10	3
OVARIAN	NM_000196	HSD11B2	3291	P80365	Corticosteroid 11-beta-dehydrogenase isozyme 2;HSD11B2	SUBFAMILY NOT NAMED (PTHR24309:SF29)	11-beta-hydroxysteroid dehydrogenase [NAD(P)] activity;NAD binding;binding;oxidoreductase activity;steroid binding;	female pregnancy;glucocorticoid biosynthetic process;regulation of blood volume by renal aldosterone;response to drug;response to food;response to glucocorticoid stimulus;response to hypoxia;response to insulin stimulus;response to steroid hormone stimulus;	cytoplasm;endoplasmic reticulum;microsome;	dehydrogenase		26	4	0	1	0	4	0
OVARIAN	NM_004744	LRAT	9227	O95237	Lecithin retinol acyltransferase;LRAT	LECITHIN RETINOL ACYLTRANSFERASE (PTHR13943:SF1)	acyltransferase activity;phosphatidylcholine-retinol O-acyltransferase activity;transferase activity;	response to stimulus;retinoid metabolic process;steroid metabolic process;visual perception;	cytoplasm;endoplasmic reticulum membrane;endosome;integral to membrane;membrane;multivesicular body;perinuclear region of cytoplasm;rough endoplasmic reticulum;	acyltransferase		22	2	0	1	0	5	0
OVARIAN	NM_020996	FGF6	2251	P10767	Fibroblast growth factor 6;FGF6	FIBROBLAST GROWTH FACTOR-4,6 (PTHR11486:SF25)	growth factor activity;	angiogenesis;cartilage condensation;cell differentiation;cell proliferation;cell-cell signaling;fibroblast growth factor receptor signaling pathway;insulin receptor signaling pathway;multicellular organismal development;myoblast differentiation;positive regulation of cell division;positive regulation of cell proliferation;signal transduction;	extracellular region;extracellular space;sarcolemma;	growth factor	FGF signaling pathway->fibroblast growth factor;;	21	2	4	13	1	5	0
OVARIAN	NM_004480	FUT8	2530	Q9BYC5	Alpha-(1,6)-fucosyltransferase;FUT8	SUBFAMILY NOT NAMED (PTHR13132:SF2)	SH3 domain binding;glycoprotein 6-alpha-L-fucosyltransferase activity;transferase activity, transferring glycosyl groups;	L-fucose catabolic process;N-glycan processing;cell migration;cellular protein metabolic process;in utero embryonic development;integrin-mediated signaling pathway;oligosaccharide biosynthetic process;post-translational protein modification;protein N-linked glycosylation;protein N-linked glycosylation via asparagine;protein glycosylation in Golgi;receptor metabolic process;respiratory gaseous exc…	Golgi apparatus;Golgi cisterna membrane;Golgi membrane;integral to membrane;membrane;	glycosyltransferase	Notch signaling pathway->Neurotic;;	18	2	0	0	1	2	1
OVARIAN	NM_000478	ALPL	249	P05186	Alkaline phosphatase, tissue-nonspecific isozyme;ALPL	ALKALINE PHOSPHATASE (AP-TNAP) (LIVER/BONE/KIDNEY ISOZYME) (TNSALP) (PTHR11596:SF13)	alkaline phosphatase activity;hydrolase activity;metal ion binding;	biomineral tissue development;cellular response to organic cyclic compound;cementum mineralization;response to antibiotic;response to glucocorticoid stimulus;response to lipopolysaccharide;response to vitamin D;skeletal system development;	anchored to membrane;cytoplasm;extracellular space;integral to membrane;plasma membrane;	nucleotide phosphatase		17	1	0	2	0	1	1
OVARIAN	NM_012183	FOXD3	27022	Q9UJU5	Forkhead box protein D3;FOXD3	SUBFAMILY NOT NAMED (PTHR11829:SF50)	DNA bending activity;double-stranded DNA binding;protein binding;sequence-specific DNA binding;sequence-specific DNA binding transcription factor activity;sequence-specific enhancer binding RNA polymerase II transcription factor activity;transcription factor binding;	axon extension involved in axon guidance;branching involved in ureteric bud morphogenesis;cartilage development;embryonic placenta development;enteric nervous system development;in utero embryonic development;iridophore differentiation;kidney development;lateral line nerve glial cell development;melanocyte differentiation;negative regulation of transcription from RNA polymerase II promoter;neural…	nucleus;transcription factor complex;	transcription factor	Insulin/IGF pathway-protein kinase B signaling cascade->Forkhead transcription factor;;TGF-beta signaling pathway->Co-activators or corepressors;;PI3 kinase pathway->FOXO;;Interleukin signaling pathway->Forkhead in Rhabdomyosarcoma-like 1;;;;;	15	2	0	6	1	0	2
OVARIAN	NM_001418	EIF4G2	1982	P78344	Eukaryotic translation initiation factor 4 gamma 2;EIF4G2	EUKARYOTIC TRANSLATION INITIATION FACTOR 4 GAMMA 2 (PTHR23253:SF5)	protein binding;translation factor activity, nucleic acid binding;translation initiation factor activity;	RNA metabolic process;cell cycle arrest;cell death;regulation of translational initiation;translation;translational initiation;	eukaryotic translation initiation factor 4F complex;	translation factor		12	1	0	2	0	0	0
OVARIAN	NM_021003	PPM1A	5494	P35813	Protein phosphatase 1A;PPM1A	PROTEIN PHOSPHATASE 2C ALPHA, BETA (PTHR13832:SF90)	hydrolase activity;magnesium ion binding;manganese ion binding;protein C-terminus binding;protein binding;protein serine/threonine phosphatase activity;signal transducer activity;	Wnt receptor signaling pathway;cell cycle arrest;dephosphorylation;insulin receptor signaling pathway;positive regulation of I-kappaB kinase/NF-kappaB cascade;positive regulation of Wnt receptor signaling pathway;positive regulation of transcription, DNA-dependent;protein dephosphorylation;signal transduction;	cellular_component;cytosol;membrane fraction;neuron projection;nucleus;protein serine/threonine phosphatase complex;voltage-gated calcium channel complex;	protein phosphatase		11	0	1	2	1	0	0
OVARIAN	NM_001633	AMBP	259	P02760	Trypstatin;AMBP	PROTEIN AMBP (PTHR10083:SF18)	IgA binding;calcium channel inhibitor activity;calcium oxalate binding;heme binding;peptidase inhibitor activity;protein homodimerization activity;serine-type endopeptidase inhibitor activity;transporter activity;	cell adhesion;female pregnancy;heme catabolic process;interspecies interaction between organisms;negative regulation of JNK cascade;negative regulation of immune response;protein-chromophore linkage;	extracellular region;microsome;plasma membrane;	serine protease inhibitor		9	0	0	0	0	2	1
OVARIAN	NM_007084	SOX21	11166	Q9Y651	Transcription factor SOX-21;SOX21	TRANSCRIPTION FACTOR SOX-21 (PTHR10270:SF108)	DNA binding;sequence-specific DNA binding RNA polymerase II transcription factor activity;sequence-specific DNA binding transcription factor activity;	regulation of transcription from RNA polymerase II promoter;regulation of transcription, DNA-dependent;stem cell differentiation;transcription from RNA polymerase II promoter;transcription, DNA-dependent;	cellular_component;nucleus;	HMG box transcription factor		9	1	1	0	0	0	0
OVARIAN	NM_004584	RAD9A	5883	Q99638	Cell cycle checkpoint control protein RAD9A;RAD9A	SUBFAMILY NOT NAMED (PTHR15237:SF0)	3'-5' exonuclease activity;SH3 domain binding;enzyme binding;exodeoxyribonuclease III activity;histone deacetylase binding;hydrolase activity;protein binding;protein kinase binding;	DNA damage checkpoint;DNA repair;DNA replication;DNA replication checkpoint;cell cycle checkpoint;positive regulation of apoptosis;response to DNA damage stimulus;	cytoplasm;nucleolus;nucleoplasm;nucleus;	kinase activator		8	2	1	1	0	4	0
OVARIAN	NM_001538	HSF4	3299	Q9ULV5	Heat shock factor protein 4;HSF4	HEAT SHOCK TRANSCRIPTION FACTOR 4 (HSF4) (PTHR10015:SF43)	sequence-specific DNA binding;sequence-specific DNA binding transcription factor activity;transcription corepressor activity;	camera-type eye development;cell development;histone H3-K9 demethylation;negative regulation of transcription from RNA polymerase II promoter;positive regulation of cell differentiation;positive regulation of cell proliferation;positive regulation of transcription from RNA polymerase II promoter;protein homotrimerization;regulation of transcription, DNA-dependent;response to stress;transcription,…	nucleus;	transcription factor		7	0	0	2	0	1	0
OVARIAN	NM_002731	PRKACB	5567	P22694	cAMP-dependent protein kinase catalytic subunit beta;PRKACB	SUBFAMILY NOT NAMED (PTHR24353:SF84)	ATP binding;cAMP-dependent protein kinase activity;kinase activity;magnesium ion binding;nucleotide binding;protein binding;protein serine/threonine kinase activity;	G-protein signaling, coupled to cAMP nucleotide second messenger;activation of phospholipase C activity;activation of protein kinase A activity;blood coagulation;carbohydrate metabolic process;cellular response to glucagon stimulus;energy reserve metabolic process;gluconeogenesis;glucose metabolic process;intracellular protein kinase cascade;lipid metabolic process;nerve growth factor receptor si…	cAMP-dependent protein kinase complex;centrosome;cytoplasm;cytosol;nucleoplasm;nucleus;plasma membrane;	protein kinase	Heterotrimeric G-protein signaling pathway-rod outer segment phototransduction->Protein kinase A;;Beta1 adrenergic receptor signaling pathway->PKA;;GABA-B_receptor_II_signaling->cAMP-dependent protein kinase;;Metabotropic glutamate receptor group II pathway->Protein Kinase A;;Endothelin signaling pathway->adenosine-3'-5'-cyclic monophosphate -dependent kinase;;Muscarinic acetylcholine receptor 2 …	7	1	2	1	0	1	0
OVARIAN	NM_006593	TBR1	10716	Q16650	T-box brain protein 1;TBR1	T-BRAIN-1 PROTEIN (PTHR11267:SF14)	DNA binding;sequence-specific DNA binding transcription factor activity;	axon guidance;brain development;hindbrain development;positive regulation of transcription from RNA polymerase II promoter;regulation of transcription, DNA-dependent;transcription, DNA-dependent;	intracellular;nucleus;	basic helix-loop-helix transcription factor		7	1	0	0	0	0	0
OVARIAN	NM_014360	NKX2-8	26257	O15522	Homeobox protein Nkx-2.8;NKX2-8	SUBFAMILY NOT NAMED (PTHR24340:SF176)	double-stranded DNA binding;sequence-specific DNA binding;sequence-specific DNA binding transcription factor activity;	axonogenesis;liver development;lung development;multicellular organismal development;negative regulation of epithelial cell proliferation;transcription from RNA polymerase II promoter;	cellular_component;nucleus;	homeobox transcription factor		7	4	3	4	0	0	1
OVARIAN	NM_001969	EIF5	1983	P55010	eukaryotic translation initiation factor 5		GTP binding;GTPase activity;nucleotide binding;translation factor activity, nucleic acid binding;translation initiation factor activity;	GTP catabolic process;RNA metabolic process;cellular protein metabolic process;gene expression;regulation of translational initiation;translation;translational initiation;	cytoplasm;cytosol;			6	2	0	0	0	0	0
OVARIAN	NM_173363	Eif5	217869	P59325	eukaryotic translation initiation factor 5		0	0	0			6	2	0	0	0	0	0
OVARIAN	XM_027237	MAP3K9	4293	P80192	Mitogen-activated protein kinase kinase kinase 9;MAP3K9	MIXED LINEAGE KINASE, MLK (PTHR23257:SF87)	ATP binding;JUN kinase kinase kinase activity;MAP kinase kinase activity;nucleotide binding;protein homodimerization activity;protein serine/threonine kinase activity;	activation of JUN kinase activity;protein autophosphorylation;protein phosphorylation;	cellular_component;	protein kinase	Huntington disease->Mixed lineage kinase 2;;	6	2	1	1	0	0	0
OVARIAN	NM_001029871	RSPO4	343637	Q2I0M5	R-spondin-4;RSPO4	SUBFAMILY NOT NAMED (PTHR23275:SF1)	heparin binding;	Wnt receptor signaling pathway;response to stimulus;	extracellular region;			5	0	0	0	0	0	0
OVARIAN	NM_003350	UBE2V2	7336	Q15819	Ubiquitin-conjugating enzyme E2 variant 2;UBE2V2	SUBFAMILY NOT NAMED (PTHR24067:SF8)	acid-amino acid ligase activity;protein binding;	DNA double-strand break processing;cell proliferation;protein polyubiquitination;protein ubiquitination;regulation of DNA repair;	UBC13-MMS2 complex;cytoplasm;nucleus;	transfer/carrier protein	Ubiquitin proteasome pathway->Ubiquitin-conjugating enzyme E2;;Toll receptor signaling pathway->Uev1A;;;	4	0	0	0	0	1	0
OVARIAN	NM_153019	TMPRSS6	164656	Q8IU80	Transmembrane protease, serine 6;TMPRSS6	SUBFAMILY NOT NAMED (PTHR24256:SF165)	peptidase activity;serine-type endopeptidase activity;	angiogenesis;extracellular matrix organization;fibrinolysis;intracellular signal transduction;proteolysis;	integral to membrane;intracellular;plasma membrane;	receptor		4	0	0	0	0	1	0
OVARIAN	NM_080812	COL13A1	1305	Q5TAT6	Collagen alpha-1(XIII) chain;COL13A1	SUBFAMILY NOT NAMED (PTHR24023:SF80)	extracellular matrix structural constituent;heparin binding;protein binding;	cell differentiation;cell-cell adhesion;cell-matrix adhesion;endochondral ossification;morphogenesis of a branching structure;multicellular organismal development;	cell-cell junction;collagen;collagen type XIII;integral to membrane;plasma membrane;	peptide hormone	Integrin signalling pathway->Collagen;;	3	0	0	0	0	0	0
OVARIAN	NM_000829	GRIA4	2893	P48058	Glutamate receptor 4;GRIA4	GLUTAMATE RECEPTOR, IONOTROPIC AMPA, SUBUNIT 1, 2, 3, 4 (PTHR18966:SF29)	alpha-amino-3-hydroxy-5-methyl-4-isoxazole propionate selective glutamate receptor activity;extracellular-glutamate-gated ion channel activity;ion channel activity;receptor activity;	glutamate signaling pathway;ion transport;positive regulation of synaptic transmission, glutamatergic;regulation of synaptic transmission;response to fungicide;synaptic transmission;transport;	cell junction;dendrite;endocytic vesicle membrane;integral to membrane;neuronal cell body;plasma membrane;postsynaptic density;postsynaptic membrane;synapse;terminal button;	ligand-gated ion channel	Ionotropic glutamate receptor pathway->Glutamate receptor, ionotropic, AMPA 4;;Metabotropic glutamate receptor group III pathway->AMPA/Kainate Receptor;;Ionotropic glutamate receptor pathway->Glutamate receptor, ionotropic, AMPA 3;;Ionotropic glutamate receptor pathway->Glutamate receptor, ionotropic, AMPA 1;;Ionotropic glutamate receptor pathway->Glutamate receptor, ionotropic, AMPA 2;;Ionotropi…	2	0	1	0	0	0	0
OVARIAN	NM_002637	PHKA1	5255	P46020	Phosphorylase b kinase regulatory subunit alpha, skeletal muscle isoform;PHKA1	PHOSPHORYLASE B KINASE REGULATORY SUBUNIT ALPHA, SKELETAL MUSCLE ISOFORM (PTHR10749:SF4)	calmodulin binding;catalytic activity;glucan 1,4-alpha-glucosidase activity;phosphorylase kinase activity;	carbohydrate metabolic process;generation of precursor metabolites and energy;glucose metabolic process;glycogen catabolic process;glycogen metabolic process;polysaccharide metabolic process;protein autophosphorylation;	cytosol;phosphorylase kinase complex;plasma membrane;	kinase activator	Heterotrimeric G-protein signaling pathway-Gi alpha and Gs alpha mediated pathway->Phosphorylase b kinase;;	2	0	0	1	0	0	0
OVARIAN	NM_005212	CSN3	1448	Q9UNS2	COP9 signalosome complex subunit 3;COPS3	COP9 SIGNALOSOME COMPLEX SUBUNIT 3 (PTHR10758:SF1)	molecular_function;protein binding;	0	extracellular region;	enzyme modulator		2	1	0	0	0	0	0
OVARIAN	NM_005272	GNAT2	2780	P19087	Guanine nucleotide-binding protein G(t) subunit alpha-2;GNAT2	GUANINE NUCLEOTIDE-BINDING PROTEIN G(T) SUBUNIT ALPHA-2 (PTHR10218:SF68)	G-protein beta/gamma-subunit complex binding;G-protein coupled photoreceptor activity;G-protein-coupled receptor binding;GTP binding;GTPase activity;guanyl nucleotide binding;nucleotide binding;signal transducer activity;	G-protein coupled receptor protein signaling pathway;G-protein signaling, coupled to cAMP nucleotide second messenger;GTP catabolic process;detection of chemical stimulus involved in sensory perception of bitter taste;detection of light stimulus involved in visual perception;detection of visible light;phototransduction;response to stimulus;retinal cone cell development;rhodopsin mediated phototra…	extrinsic to internal side of plasma membrane;heterotrimeric G-protein complex;photoreceptor inner segment;photoreceptor outer segment;photoreceptor outer segment membrane;plasma membrane;	heterotrimeric G-protein	PI3 kinase pathway->Galpha;;Metabotropic glutamate receptor group II pathway->G-protein;;Muscarinic acetylcholine receptor 2 and 4 signaling pathway->Gi;;;;	2	0	0	0	0	0	0
OVARIAN	NM_021638	AFAP1	60312	Q8N556	Actin filament-associated protein 1;AFAP1	SUBFAMILY NOT NAMED (PTHR14338:SF3)	actin binding;	0	actin cytoskeleton;cytoplasm;focal adhesion;			2	0	0	0	0	0	0
OVARIAN	NM_031309	SCRT1	83482	Q9BWW7	Transcriptional repressor scratch 1;SCRT1	SUBFAMILY NOT NAMED (PTHR11389:SF375)	DNA binding;metal ion binding;sequence-specific DNA binding transcription factor activity;zinc ion binding;	regulation of transcription, DNA-dependent;transcription, DNA-dependent;	intracellular;nucleus;	zinc finger transcription factor		2	0	0	0	1	1	0
OVARIAN	NM_003164	STX5	6811	Q13190	Syntaxin-5;STX5	SYNTAXIN 5 (PTHR19957:SF3)	SNAP receptor activity;protein N-terminus binding;	intracellular protein transport;retrograde transport, endosome to Golgi;vesicle targeting;	ER-Golgi intermediate compartment membrane;Golgi apparatus;Golgi membrane;SNARE complex;endoplasmic reticulum;integral to membrane;membrane;nucleolus;nucleus;	SNARE protein		1	0	0	0	0	0	0
OVARIAN	NM_005481	MED16	10025	Q9Y2X0	Mediator of RNA polymerase II transcription subunit 16;MED16	SUBFAMILY NOT NAMED (PTHR13224:SF2)	receptor activity;thyroid hormone receptor binding;thyroid hormone receptor coactivator activity;transcription coactivator activity;transcription cofactor activity;vitamin D receptor binding;	androgen receptor signaling pathway;gene expression;positive regulation of transcription, DNA-dependent;regulation of transcription from RNA polymerase II promoter;steroid hormone receptor signaling pathway;transcription from RNA polymerase II promoter;transcription initiation from RNA polymerase II promoter;	mediator complex;nucleoplasm;nucleus;			1	0	0	0	0	0	0
OVARIAN	NM_007072	HHLA2	11148	Q9UM44	HERV-H LTR-associating protein 2;HHLA2		molecular_function;	biological_process;	cellular_component;integral to membrane;membrane;			1	0	0	0	0	0	0
OVARIAN	NM_012304	FBXL7	23194	Q9UJT9	F-box/LRR-repeat protein 7;FBXL7	FBXL7 (PTHR23125:SF70)	protein binding;ubiquitin-protein ligase activity;	protein ubiquitination;ubiquitin-dependent protein catabolic process;	ubiquitin ligase complex;	damaged DNA-binding protein		1	0	0	0	0	1	0
OVARIAN	NM_014921	LPHN1	22859	O94910	Latrophilin-1;LPHN1	LATROPHILIN 1 (PTHR12011:SF62)	G-protein coupled receptor activity;latrotoxin receptor activity;sugar binding;toxin binding;	G-protein coupled receptor protein signaling pathway;brain development;neuropeptide signaling pathway;	integral to membrane;plasma membrane;postsynaptic density;	G-protein coupled receptor		1	0	0	0	0	0	0
OVARIAN	NM_014925	R3HDM2	22864	Q9Y2K5	R3H domain-containing protein 2;R3HDM2	R3H DOMAIN CONTAINING PROTEIN (PTHR15672:SF8)	nucleic acid binding;	0	nucleus;			1	1	0	0	0	0	0
OVARIAN	NM_023922	TAS2R14	50840	Q9NYV8	Taste receptor type 2 member 14;TAS2R14	SUBFAMILY NOT NAMED (PTHR11394:SF18)	bitter taste receptor activity;receptor activity;taste receptor activity;	G-protein coupled receptor protein signaling pathway;detection of chemical stimulus involved in sensory perception of bitter taste;response to stimulus;sensory perception of taste;	integral to membrane;membrane;			1	0	0	0	0	0	0
OVARIAN	NM_152503	C20orf132	140699	Q9H579	Uncharacterized protein C20orf132;C20orf132		0	0	0			1	0	0	0	1	1	0
OVARIAN	NM_001010940	C9orf135	138255	Q5VTT2	Uncharacterized protein C9orf135;C9orf135		0	0	integral to membrane;membrane;			0	0	0	0	0	0	0
OVARIAN	NM_001013714	LOC440993	440993	#N/A	uncharacterized LOC440993		0	0	0			0	0	0	0	0	0	0
OVARIAN	NM_018841	GNG12	55970	Q9UBI6	Guanine nucleotide-binding protein G(I)/G(S)/G(O) subunit gamma-12;GNG12	GUANINE NUCLEOTIDE-BINDING PROTEIN G(I)/G(S)/G(O) GAMMA-12 (PTHR13809:SF9)	phosphate binding;signal transducer activity;	G-protein coupled receptor protein signaling pathway;cellular response to glucagon stimulus;cerebral cortex development;energy reserve metabolic process;response to lipopolysaccharide;signal transduction;synaptic transmission;	actin filament;heterotrimeric G-protein complex;plasma membrane;	heterotrimeric G-protein	5HT4 type receptor mediated signaling pathway->G-protein;;5HT1 type receptor mediated signaling pathway->G-protein;;Inflammation mediated by chemokine and cytokine signaling pathway->G beta/gamma subunits;;Beta3 adrenergic receptor signaling pathway->G-Protein;;GABA-B_receptor_II_signaling->Ggamma;;Thyrotropin-releasing hormone receptor signaling pathway->G-Protein;;Muscarinic acetylcholine recep…	0	0	0	0	0	0	0
OVARIAN	NM_019056	NDUFB11	54539	Q9NX14	NADH dehydrogenase [ubiquinone] 1 beta subcomplex subunit 11, mitochondrial;NDUFB11	SUBFAMILY NOT NAMED (PTHR13327:SF0)	0	respiratory electron transport chain;transport;	integral to membrane;membrane;mitochondrial inner membrane;mitochondrial respiratory chain complex I;mitochondrion;respiratory chain;	oxidoreductase		0	0	0	0	0	0	0
OVARIAN	NM_020652	ZNF286A	57335	Q9HBT8	Zinc finger protein 286A;ZNF286A	SUBFAMILY NOT NAMED (PTHR24377:SF386)	DNA binding;metal ion binding;zinc ion binding;	regulation of transcription, DNA-dependent;	intracellular;nucleus;	KRAB box transcription factor		0	0	0	0	0	0	0
OVARIAN	NM_023076	C16orf28	65259	Q9H9P5	RING finger protein unkempt-like;UNKL	RING FINGER PROTEIN UNKEMPT-LIKE (PTHR14493:SF8)	0	0	0			0	0	0	0	0	0	0
OVARIAN	NM_024317	LILRP2	79166	#N/A	leukocyte immunoglobulin-like receptor pseudogene 2		0	0	0			0	0	0	0	0	0	0
OVARIAN	NM_024836	ZNF672	79894	Q499Z4	Zinc finger protein 672;ZNF672	SUBFAMILY NOT NAMED (PTHR24375:SF273)	DNA binding;metal ion binding;zinc ion binding;	regulation of transcription, DNA-dependent;	intracellular;nucleus;	KRAB box transcription factor		0	0	0	0	0	0	0
OVARIAN	NM_138412	RDH13	112724	Q8NBN7	Retinol dehydrogenase 13;RDH13	SUBFAMILY NOT NAMED (PTHR24320:SF98)	binding;oxidoreductase activity;	0	0	dehydrogenase		0	0	0	0	0	0	0
OVARIAN	NM_194302	CCDC108	255101	Q6ZU64	Coiled-coil domain-containing protein 108;CCDC108		structural molecule activity;	0	integral to membrane;membrane;			0	0	0	0	0	0	0
PANCREATIC	NM_004345	CAMP	820	P49913	Antibacterial protein LL-37;CAMP	CATHELICIDIN (PTHR10206:SF0)	0	defense response to Gram-negative bacterium;defense response to Gram-positive bacterium;defense response to bacterium;killing by host of symbiont cells;negative regulation of growth of symbiont in host;negative regulation of growth of symbiont on or near host surface;	extracellular region;specific granule;	protease inhibitor		28	5	0	0	3	5	0
PANCREATIC	NM_000065	C6	729	P13671	Complement component C6;C6	COMPLEMENT COMPONENT C6 (PTHR19325:SF23)	protein binding;	activation of caspase activity;complement activation;complement activation, classical pathway;cytolysis;in utero embryonic development;induction of apoptosis;innate immune response;positive regulation of activation of membrane attack complex;positive regulation of angiogenesis;	extracellular region;extracellular space;membrane attack complex;	apolipoprotein		1	0	0	0	0	0	0
PANCREATIC	NM_000064	C3	718	P01024	Complement C3c alpha' chain fragment 2;C3	COMPLEMENT C3 (PTHR11412:SF14)	endopeptidase inhibitor activity;protein binding;receptor binding;	G-protein coupled receptor protein signaling pathway;complement activation;complement activation, alternative pathway;complement activation, classical pathway;immune response;inflammatory response;innate immune response;positive regulation of activation of membrane attack complex;positive regulation of angiogenesis;positive regulation of phagocytosis;positive regulation of type IIa hypersensitivi…	extracellular region;extracellular space;	cytokine		11	2	0	0	0	2	0
PANCREATIC	NM_004985	KRAS	3845	P01116	GTPase KRas;KRAS	SUBFAMILY NOT NAMED (PTHR24070:SF125)	GDP binding;GMP binding;GTP binding;GTPase activity;LRR domain binding;nucleotide binding;protein binding;	MAPKKK cascade;Ras protein signal transduction;activation of MAPKK activity;axon guidance;blood coagulation;cytokine-mediated signaling pathway;epidermal growth factor receptor signaling pathway;insulin receptor signaling pathway;leukocyte migration;nerve growth factor receptor signaling pathway;positive regulation of MAP kinase activity;positive regulation of NF-kappaB transcription factor activ…	intracellular;membrane raft;mitochondrion;plasma membrane;	small GTPase	PI3 kinase pathway->Ras-GDP;;Inflammation mediated by chemokine and cytokine signaling pathway->Rat Sarcoma GTP-binding protein;;Angiogenesis->Ras;;Integrin signalling pathway->Ras;;VEGF signaling pathway->Ras;;FGF signaling pathway->Ras;;Ras Pathway->Ras;;TGF-beta signaling pathway->Ras-GTP;;EGF receptor signaling pathway->Ras;;TGF-beta signaling pathway->Ras-GDP;;T cell activation->Ras;;B cell …	2280	254	201	1664	94	95	265
PANCREATIC	NM_033360	KRAS	3845	P01116	GTPase KRas;KRAS	SUBFAMILY NOT NAMED (PTHR24070:SF125)	GDP binding;GMP binding;GTP binding;GTPase activity;LRR domain binding;nucleotide binding;protein binding;	MAPKKK cascade;Ras protein signal transduction;activation of MAPKK activity;axon guidance;blood coagulation;cytokine-mediated signaling pathway;epidermal growth factor receptor signaling pathway;insulin receptor signaling pathway;leukocyte migration;nerve growth factor receptor signaling pathway;positive regulation of MAP kinase activity;positive regulation of NF-kappaB transcription factor activ…	intracellular;membrane raft;mitochondrion;plasma membrane;	small GTPase	PI3 kinase pathway->Ras-GDP;;Inflammation mediated by chemokine and cytokine signaling pathway->Rat Sarcoma GTP-binding protein;;Angiogenesis->Ras;;Integrin signalling pathway->Ras;;VEGF signaling pathway->Ras;;FGF signaling pathway->Ras;;Ras Pathway->Ras;;TGF-beta signaling pathway->Ras-GTP;;EGF receptor signaling pathway->Ras;;TGF-beta signaling pathway->Ras-GDP;;T cell activation->Ras;;B cell …	2280	254	201	1664	94	95	265
PANCREATIC	NM_000201	ICAM1	3383	P05362	Intercellular adhesion molecule 1;ICAM1	INTERCELLULAR ADHESION MOLECULE-1, ICAM1 (PTHR13771:SF5)	cell surface binding;integrin binding;protein binding;receptor activity;transmembrane receptor activity;	T cell activation via T cell receptor contact with antigen bound to MHC molecule on antigen presenting cell;T cell antigen processing and presentation;adhesion to symbiont;cell adhesion;cell adhesion mediated by integrin;cell aging;cellular response to alkaloid;cellular response to glucose stimulus;cellular response to hypoxia;cellular response to interleukin-1;cellular response to lipopolysaccha…	external side of plasma membrane;extracellular space;immunological synapse;integral to plasma membrane;plasma membrane;	signaling molecule		2250	268	13	108	43	136	48
PANCREATIC	NM_000118	ENG	2022	P17813	Endoglin;ENG	ENDOGLIN (PTHR14002:SF1)	activin binding;galactose binding;glycosaminoglycan binding;protein binding;protein homodimerization activity;transforming growth factor beta binding;transforming growth factor beta receptor activity;transforming growth factor beta receptor, cytoplasmic mediator activity;transmembrane receptor activity;type I transforming growth factor beta receptor binding;type II transforming growth factor beta…	BMP signaling pathway;artery morphogenesis;cell adhesion;cell chemotaxis;cell migration;cell motility;central nervous system vasculogenesis;chronological cell aging;detection of hypoxia;extracellular matrix disassembly;heart development;heart looping;negative regulation of endothelial cell proliferation;negative regulation of nitric-oxide synthase activity;negative regulation of pathway-restricte…	cell surface;external side of plasma membrane;extracellular space;integral to membrane;membrane;membrane fraction;transforming growth factor beta receptor complex;	TGF-beta receptor		1632	137	21	165	52	310	26
PANCREATIC	NM_000349	STAR	6770	P25092	Heat-stable enterotoxin receptor;GUCY2C	HEAT-STABLE ENTEROTOXIN RECEPTOR PRECURSOR (INTESTINAL GUANYLATE CYCLASE) (PTHR11920:SF41)	cholesterol binding;cholesterol transporter activity;lipid binding;	C21-steroid hormone biosynthetic process;bile acid biosynthetic process;brain development;cellular lipid metabolic process;cellular response to insulin stimulus;glucocorticoid metabolic process;hormone biosynthetic process;lipid transport;positive regulation of anti-apoptosis;positive regulation of neurogenesis;regulation of neuronal synaptic plasticity;regulation of steroid biosynthetic process;…	cytosol;mitochondrial intermembrane space;mitochondrion;	adenylate cyclase		792	68	14	36	39	165	7
PANCREATIC	NM_001259	CDK6	1021	Q00534	Cell division protein kinase 6;CDK6	SUBFAMILY NOT NAMED (PTHR24056:SF82)	ATP binding;cyclin binding;cyclin-dependent protein kinase activity;nucleotide binding;protein binding;	G1 phase of mitotic cell cycle;cell cycle;cell dedifferentiation;cell division;gliogenesis;hemopoiesis;mitotic cell cycle;negative regulation of cell cycle;negative regulation of epithelial cell proliferation;negative regulation of osteoblast differentiation;positive regulation of cell-matrix adhesion;positive regulation of fibroblast proliferation;protein phosphorylation;regulation of erythrocyt…	cyclin-dependent protein kinase holoenzyme complex;cytoplasm;cytosol;nucleus;ruffle;	protein kinase		703	291	51	287	12	90	20
PANCREATIC	NM_003266	TLR4	7099	O00206	Toll-like receptor 4;TLR4	SUBFAMILY NOT NAMED (PTHR24365:SF55)	lipopolysaccharide binding;lipopolysaccharide receptor activity;phosphatidylinositol 3-kinase binding;protein binding;receptor activity;transmembrane receptor activity;	I-kappaB kinase/NF-kappaB cascade;I-kappaB phosphorylation;MyD88-dependent toll-like receptor signaling pathway;MyD88-independent toll-like receptor signaling pathway;T-helper 1 type immune response;Toll signaling pathway;activation of MAPK activity;cellular response to lipopolysaccharide;cellular response to lipoteichoic acid;cellular response to mechanical stimulus;defense response to Gram-nega…	cytoplasm;external side of plasma membrane;integral to plasma membrane;lipopolysaccharide receptor complex;membrane raft;perinuclear region of cytoplasm;plasma membrane;	receptor	Toll receptor signaling pathway->Toll-like receptor 1, 2, 3, 4, 5, 6, 7, 8, 9, 10, 11, 12;;Toll receptor signaling pathway->Toll-like receptor 2, 4, 7;;Toll receptor signaling pathway->Toll-like receptor 4;;;;	619	84	9	36	12	26	15
PANCREATIC	NM_004348	RUNX2	860	Q13950	Runt-related transcription factor 2;RUNX2	RUNX2 (PTHR11950:SF7)	ATP binding;DNA binding;protein binding;sequence-specific DNA binding transcription factor activity;	negative regulation of transcription, DNA-dependent;ossification;osteoblast differentiation;positive regulation of transcription, DNA-dependent;regulation of transcription, DNA-dependent;transcription, DNA-dependent;	nucleolus;nucleus;	transcription factor		299	76	7	59	1	46	5
PANCREATIC	NM_005063	SCD	6319	O00767	Acyl-CoA desaturase;SCD	ACYL-COA DESATURASE (STEAROYL-COA DESATURASE) (FATTY ACID DESATURASE) (DELTA(9)-DESATURASE) (PTHR11351:SF14)	iron ion binding;oxidoreductase activity;oxidoreductase activity, acting on paired donors, with oxidation of a pair of donors resulting in the reduction of molecular oxygen to two molecules of water;stearoyl-CoA 9-desaturase activity;	fatty acid biosynthetic process;	endoplasmic reticulum;endoplasmic reticulum membrane;integral to membrane;membrane;	oxidoreductase		241	14	3	6	10	19	2
PANCREATIC	NM_005611	RBL2	5934	Q08999	Retinoblastoma-like protein 2;RBL2	RETINOBLASTOMA-LIKE PROTEIN 2 (130 KDA RETINOBLASTOMA-ASSOCIATED PROTEIN) (P130) (RBR-2) (PTHR13742:SF8)	DNA binding;protein binding;	chromatin modification;regulation of cell cycle;regulation of lipid kinase activity;regulation of transcription, DNA-dependent;	chromatin;cytoplasm;nucleolus;nucleus;transcription factor complex;	transcription factor		230	66	5	68	10	17	1
PANCREATIC	NM_002879	RAD52	5893	P43351	DNA repair protein RAD52 homolog;RAD52	DNA REPAIR PROTEIN RAD52 HOMOLOG (PTHR12132:SF4)	DNA binding;protein binding;	DNA recombinase assembly;DNA repair;double-strand break repair;double-strand break repair via homologous recombination;mitotic recombination;reciprocal meiotic recombination;	nucleoplasm;nucleus;	DNA binding protein		193	7	2	9	5	28	0
PANCREATIC	NM_013274	POLL	27343	Q9UGP5	DNA polymerase lambda;POLL	DNA POLYMERASE LAMBDA (PTHR11276:SF10)	DNA binding;DNA-directed DNA polymerase activity;lyase activity;metal ion binding;nucleotidyltransferase activity;transferase activity;	DNA replication;nucleotide-excision repair;somatic hypermutation of immunoglobulin genes;	intracellular;nucleus;	DNA-directed DNA polymerase		189	2	0	1	6	33	2
PANCREATIC	NM_004620	TRAF6	7189	Q9Y4K3	TNF receptor-associated factor 6;TRAF6	TNF RECEPTOR-ASSOCIATED FACTOR 6 (PTHR10131:SF48)	histone deacetylase binding;ligase activity;metal ion binding;mitogen-activated protein kinase kinase kinase binding;protein N-terminus binding;protein binding;protein kinase B binding;protein kinase binding;ubiquitin-protein ligase activity;zinc ion binding;	I-kappaB kinase/NF-kappaB cascade;JNK cascade;MyD88-dependent toll-like receptor signaling pathway;MyD88-independent toll-like receptor signaling pathway;T cell receptor signaling pathway;Toll signaling pathway;activation of MAPK activity;activation of NF-kappaB-inducing kinase activity;activation of protein kinase activity;anti-apoptosis;apoptosis;induction of apoptosis by extracellular signals;…	CD40 receptor complex;cell cortex;cytoplasm;cytosol;endosome membrane;internal side of plasma membrane;nuclear membrane;nucleolus;nucleus;plasma membrane;	signaling molecule	Apoptosis signaling pathway->TNF receptor-associated factor 2;;Toll receptor signaling pathway->tumor necrosis factor (TNF) receptor-associated factor 6;;p53 pathway->TRAF;;;;	174	25	5	31	1	10	0
PANCREATIC	NM_000767	CYP2B6	1555	P20813	Cytochrome P450 2B6;CYP2B6	SUBFAMILY NOT NAMED (PTHR24300:SF90)	aromatase activity;electron carrier activity;heme binding;metal ion binding;monooxygenase activity;oxygen binding;	cellular ketone metabolic process;drug metabolic process;exogenous drug catabolic process;oxidation-reduction process;steroid metabolic process;xenobiotic metabolic process;	endoplasmic reticulum;endoplasmic reticulum membrane;membrane;microsome;	hydroxylase	Bupropion_degradation->Cytochrome P450 2B6;;	149	8	4	2	6	41	3
PANCREATIC	NM_004244	CD163	9332	Q86VB7	Soluble CD163;CD163	M130 ANTIGEN (CD163 PROTEIN) (PTHR19331:SF17)	protein binding;scavenger receptor activity;	acute-phase response;inflammatory response;	extracellular region;integral to plasma membrane;plasma membrane;	receptor		134	23	0	6	7	5	2
PANCREATIC	NM_006312	NCOR2	9612	Q9Y618	Nuclear receptor corepressor 2;NCOR2	NUCLEAR RECEPTOR CO-REPRESSOR 2 (NCOR2) (PTHR13992:SF2)	DNA binding;Notch binding;histone deacetylase binding;protein N-terminus binding;protein binding;transcription corepressor activity;	cellular lipid metabolic process;negative regulation of transcription from RNA polymerase II promoter;regulation of cellular ketone metabolic process by negative regulation of transcription from an RNA polymerase II promoter;regulation of transcription, DNA-dependent;	nuclear body;nucleolus;nucleoplasm;nucleus;transcriptional repressor complex;	transcription cofactor	Notch signaling pathway->Co-repressors;;Huntington disease->Nuclear receptor co-repressor;;;	115	20	1	38	5	38	0
PANCREATIC	NM_005431	XRCC2	7516	O43543	DNA repair protein XRCC2;XRCC2	X-RAY REPAIR CROSS COMPLEMENTING PROTEIN 2, XRCC2 (PTHR22942:SF5)	ATP binding;DNA binding;DNA-dependent ATPase activity;	DNA recombination;DNA repair;double-strand break repair via homologous recombination;in utero embryonic development;meiosis;negative regulation of neuron apoptosis;positive regulation of neurogenesis;response to X-ray;response to gamma radiation;	nucleus;	DNA strand-pairing protein		108	6	2	4	8	31	2
PANCREATIC	NM_002335	LRP5	4041	O75197	Low-density lipoprotein receptor-related protein 5;LRP5	LOW-DENSITY LIPOPROTEIN RECEPTOR-RELATED PROTEIN 5 (PTHR10529:SF108)	protein binding;receptor activity;toxin transporter activity;	Wnt receptor signaling pathway;Wnt receptor signaling pathway involved in dorsal/ventral axis specification;adipose tissue development;bone marrow development;bone morphogenesis;canonical Wnt receptor signaling pathway;cholesterol homeostasis;endocytosis;glucose catabolic process;multicellular organismal development;negative regulation of osteoblast differentiation;negative regulation of protein …	endoplasmic reticulum;integral to membrane;plasma membrane;receptor complex;	receptor	Alzheimer disease-presenilin pathway->LRP C-terminal fragment;;Alzheimer disease-presenilin pathway->Low-density lipoprotein receptor-related protein;;Alzheimer disease-presenilin pathway->LRP N-terminal fragment;;Alzheimer disease-presenilin pathway->LRP intracellular fragment;;Alzheimer disease-presenilin pathway->LRP transmembrane fragment;;Wnt signaling pathway->Low density lipoprotein recept…	98	23	1	22	1	8	4
PANCREATIC	NM_001730	KLF5	688	Q13887	Krueppel-like factor 5;KLF5	KRUEPPEL-LIKE FACTOR 5 (INTESTINAL-ENRICHED KRUEPPEL-LIKE FACTOR) (PTHR23223:SF24)	DNA binding;metal ion binding;sequence-specific DNA binding transcription factor activity;zinc ion binding;	angiogenesis;microvillus assembly;positive regulation of cell proliferation;transcription from RNA polymerase II promoter;	intracellular;nucleus;	zinc finger transcription factor		85	49	4	22	1	16	1
PANCREATIC	NM_015399	BRMS1	25855	Q9HCU9	Breast cancer metastasis-suppressor 1;BRMS1	BREAST CANCER METASTASIS-SUPPRESSOR 1 (PTHR21964:SF4)	NF-kappaB binding;protein binding;	apoptosis;negative regulation of NF-kappaB transcription factor activity;negative regulation of anti-apoptosis;negative regulation of transcription, DNA-dependent;positive regulation of anoikis;positive regulation of protein deacetylation;	cytoplasm;nucleus;			78	8	1	9	7	67	0
PANCREATIC	NM_002259	KLRC1	3821	P26715	NKG2-A/NKG2-B type II integral membrane protein;KLRC1	NATURAL KILLER CELL RECEPTOR NKG2A (PTHR22800:SF12)	binding;sugar binding;transmembrane receptor activity;	cell surface receptor linked signaling pathway;regulation of immune response;	integral to plasma membrane;plasma membrane;	membrane-bound signaling molecule		66	10	1	2	1	1	0
PANCREATIC	NM_003332	TYROBP	7305	O43914	TYRO protein tyrosine kinase-binding protein;TYROBP	SUBFAMILY NOT NAMED (PTHR17554:SF0)	identical protein binding;protein binding;receptor signaling protein activity;	axon guidance;cell junction assembly;cellular defense response;intracellular signal transduction;regulation of immune response;signal transduction;	integral to plasma membrane;intracellular;plasma membrane;	immunoglobulin receptor superfamily		60	3	0	3	1	1	0
PANCREATIC	NM_018646	TRPV6	55503	Q9H1D0	Transient receptor potential cation channel subfamily V member 6;TRPV6	TRANSIENT RECEPTOR POTENTIAL CATION CHANNEL SUBFAMILY V MEMBER 6 (EPITHELIAL CALCIUM CHANNEL 2) (PTHR10582:SF1)	calcium channel activity;calmodulin binding;ion channel activity;	calcium ion transmembrane transport;calcium ion transport;ion transport;regulation of calcium ion-dependent exocytosis;transmembrane transport;	integral to plasma membrane;plasma membrane;	ion channel		52	15	0	5	1	6	6
PANCREATIC	NM_003872	NRP2	8828	O60462	Neuropilin-2;NRP2	NEUROPILIN-2 (PTHR10127:SF30)	heparin binding;metal ion binding;receptor activity;semaphorin receptor activity;vascular endothelial growth factor receptor activity;	angiogenesis;axon guidance;cell adhesion;cell differentiation;cellular response to protein stimulus;heart development;multicellular organismal development;negative chemotaxis;nervous system development;neural crest cell migration;vascular endothelial growth factor receptor signaling pathway;	axon;integral to membrane;membrane fraction;plasma membrane;	transporter		49	11	1	2	0	5	0
PANCREATIC	NM_003566	EEA1	8411	Q15075	Early endosome antigen 1;EEA1	SUBFAMILY NOT NAMED (PTHR23164:SF0)	1-phosphatidylinositol binding;GTP-dependent protein binding;calmodulin binding;metal ion binding;protein binding;protein homodimerization activity;zinc ion binding;	early endosome to late endosome transport;synaptic vesicle to endosome fusion;vesicle fusion;	cytoplasm;cytosol;early endosome;early endosome membrane;extrinsic to plasma membrane;intracellular;membrane;membrane fraction;serine-pyruvate aminotransferase complex;	membrane trafficking regulatory protein		44	3	0	6	1	2	0
PANCREATIC	NM_006350	FST	10468	P19883	Follistatin;FST	FOLLISTATIN (PTHR10913:SF6)	activin binding;heparan sulfate proteoglycan binding;protein binding;signal transducer activity;	BMP signaling pathway;female gonad development;gamete generation;hair follicle morphogenesis;hemopoietic progenitor cell differentiation;keratinocyte proliferation;negative regulation of activin receptor signaling pathway;negative regulation of cell differentiation;negative regulation of follicle-stimulating hormone secretion;negative regulation of transcription from RNA polymerase II promoter;od…	extracellular region;	enzyme modulator		44	5	3	4	5	9	0
PANCREATIC	NM_003155	STC1	6781	P52823	Stanniocalcin-1;STC1	STANNIOCALCIN 1 (PTHR11245:SF1)	hormone activity;	cell surface receptor linked signaling pathway;cell-cell signaling;cellular calcium ion homeostasis;cellular response to cAMP;cellular response to glucocorticoid stimulus;cellular response to hypoxia;decidualization;embryo implantation;ossification;response to nutrient;response to organic cyclic compound;response to vitamin D;	apical plasma membrane;cytoplasm;extracellular region;extracellular space;	transferase		36	8	1	3	5	10	1
PANCREATIC	NM_004409	DMPK	1760	Q09013	Myotonin-protein kinase;DMPK	SUBFAMILY NOT NAMED (PTHR24356:SF29)	ATP binding;metal ion binding;nucleotide binding;protein binding;protein kinase activity;protein serine/threonine kinase activity;	protein modification process;protein phosphorylation;regulation of excitatory postsynaptic membrane potential involved in skeletal muscle contraction;regulation of heart contraction;regulation of sodium ion transport;	0	protein kinase		36	3	0	0	0	6	1
PANCREATIC	NM_004915	ABCG1	9619	P45844	ATP-binding cassette sub-family G member 1;ABCG1	ABC TRANSPORTER G1 (WHITE PROTEIN) (ABCG1) (PTHR19241:SF21)	ADP binding;ATP binding;ATPase activity;cholesterol binding;cholesterol transporter activity;glycoprotein transporter activity;nucleotide binding;phospholipid binding;phospholipid transporter activity;protein dimerization activity;protein heterodimerization activity;protein homodimerization activity;sterol-transporting ATPase activity;toxin transporter activity;	amyloid precursor protein catabolic process;cholesterol efflux;cholesterol homeostasis;cholesterol metabolic process;detection of hormone stimulus;glycoprotein transport;high-density lipoprotein particle remodeling;intracellular cholesterol transport;lipid metabolic process;lipoprotein metabolic process;low-density lipoprotein particle remodeling;negative regulation of cholesterol storage;negativ…	Golgi apparatus;Golgi membrane;endoplasmic reticulum;endoplasmic reticulum membrane;endosome;external side of plasma membrane;integral to plasma membrane;intracellular;plasma membrane;recycling endosome;	ATP-binding cassette (ABC) transporter		35	3	0	3	2	4	1
PANCREATIC	NM_002510	GPNMB	10457	Q14956	Transmembrane glycoprotein NMB;GPNMB	GLYCOPROTEIN (TRANSMEMBRANE) NMB (PTHR11861:SF2)	heparin binding;integrin binding;	bone mineralization;cell adhesion;negative regulation of cell proliferation;osteoblast differentiation;	cytoplasmic membrane-bounded vesicle;integral to membrane;integral to plasma membrane;melanosome;membrane;	membrane-bound signaling molecule		33	4	0	3	1	6	0
PANCREATIC	NM_013372	GREM1	26585	O60565	Gremlin-1;GREM1	SUBFAMILY NOT NAMED (PTHR15273:SF0)	cytokine activity;protein binding;	angiogenesis;apoptosis;branching involved in ureteric bud morphogenesis;cell-cell signaling;embryonic limb morphogenesis;multicellular organismal development;negative regulation of BMP signaling pathway;negative regulation of cell growth;negative regulation of leukocyte chemotaxis;nervous system development;organ morphogenesis;positive regulation of NF-kappaB import into nucleus;positive regulati…	cell surface;extracellular region;extracellular space;		Wnt signaling pathway->Cerberus;;	31	6	1	3	1	4	2
PANCREATIC	NM_005636	SSX4	6759	O60224	synovial sarcoma, X breakpoint 4		0	0	0			30	1	2	17	1	1	0
PANCREATIC	NM_000148	FUT1	2523	P19526	Galactoside 2-alpha-L-fucosyltransferase 1;FUT1	SUBFAMILY NOT NAMED (PTHR11927:SF0)	fucosyltransferase activity;galactoside 2-alpha-L-fucosyltransferase activity;transferase activity, transferring glycosyl groups;	L-fucose catabolic process;carbohydrate metabolic process;protein glycosylation;	Golgi apparatus;Golgi cisterna membrane;integral to plasma membrane;membrane;membrane fraction;	glycosyltransferase		25	2	1	0	2	2	5
PANCREATIC	NM_006251	PRKAA1	5562	Q13131	5'-AMP-activated protein kinase catalytic subunit alpha-1;PRKAA1	SUBFAMILY NOT NAMED (PTHR24343:SF61)	ATP binding;cAMP-dependent protein kinase activity;metal ion binding;nucleotide binding;protein binding;protein kinase activity;protein serine/threonine kinase activity;	activation of MAPK activity;cell cycle arrest;fatty acid biosynthetic process;insulin receptor signaling pathway;negative regulation of glucosylceramide biosynthetic process;positive regulation of anti-apoptosis;positive regulation of cholesterol biosynthetic process;protein phosphorylation;regulation of fatty acid oxidation;response to hypoxia;signal transduction;	cytosol;intracellular;	protein kinase	p53 pathway by glucose deprivation->AMP-activated protein kinase;;	24	4	1	6	3	5	2
PANCREATIC	NM_145794	DONSON	29980	Q9NYP3	Protein downstream neighbor of Son;DONSON	SUBFAMILY NOT NAMED (PTHR12972:SF0)	molecular_function;	biological_process;multicellular organismal development;	cellular_component;nucleus;			23	6	0	1	0	1	1
PANCREATIC	NM_006766	MYST3	7994	Q92794	Histone acetyltransferase MYST3;MYST3	HISTONE ACETYLTRANSFERASE MYST3 (PTHR10615:SF26)	DNA binding;acetyltransferase activity;histone acetyltransferase activity;metal ion binding;protein binding;transcription coactivator activity;transcription factor binding;transferase activity;zinc ion binding;	DNA packaging;chromatin modification;embryonic hemopoiesis;histone H3 acetylation;histone acetylation;myeloid cell differentiation;negative regulation of transcription, DNA-dependent;nucleosome assembly;positive regulation of transcription, DNA-dependent;somatic stem cell maintenance;	MOZ/MORF histone acetyltransferase complex;nucleosome;nucleus;	acetyltransferase		21	0	2	11	0	0	1
PANCREATIC	NM_000236	LIPC	3990	P11150	Hepatic triacylglycerol lipase;LIPC	HEPATIC TRIACYLGLYCEROL LIPASE (PTHR11610:SF2)	apolipoprotein binding;heparin binding;hydrolase activity;low-density lipoprotein particle binding;phospholipase activity;triglyceride lipase activity;	cholesterol homeostasis;cholesterol metabolic process;chylomicron remnant clearance;fatty acid biosynthetic process;high-density lipoprotein particle remodeling;intermediate-density lipoprotein particle remodeling;lipid catabolic process;low-density lipoprotein particle remodeling;phosphatidylcholine catabolic process;reverse cholesterol transport;triglyceride catabolic process;triglyceride homeo…	extracellular region;extracellular space;high-density lipoprotein particle;	phospholipase		18	2	0	0	0	0	0
PANCREATIC	NM_001548	IFIT1	3434	P09914	Interferon-induced protein with tetratricopeptide repeats 1;IFIT1	INTERFERON-INDUCED PROTEIN WITH TETRATRICOPEPTIDE REPEATS 1 (PTHR10271:SF2)	protein binding;	cellular response to exogenous dsRNA;cellular response to type I interferon;cytokine-mediated signaling pathway;intracellular transport of viral proteins in host cell;negative regulation of defense response to virus by host;negative regulation of helicase activity;negative regulation of protein binding;negative regulation of viral genome replication;positive regulation of viral genome replication…	cytoplasm;			17	1	0	2	0	3	0
PANCREATIC	NM_004571	PKNOX1	5316	P55347	Homeobox protein PKNOX1;PKNOX1	HOMEOBOX PROTEIN PKNOX1 (PTHR11850:SF7)	protein heterodimerization activity;sequence-specific DNA binding;sequence-specific DNA binding transcription factor activity;sequence-specific enhancer binding RNA polymerase II transcription factor activity;	T cell differentiation;angiogenesis;camera-type eye development;erythrocyte differentiation;hemopoiesis;positive regulation of transcription from RNA polymerase II promoter;regulation of transcription, DNA-dependent;transcription from RNA polymerase II promoter;	cytoplasm;nucleus;transcription factor complex;	homeobox transcription factor		17	2	0	14	0	1	1
PANCREATIC	NM_021980	OPTN	10133	Q96CV9	Optineurin;OPTN		protein C-terminus binding;protein binding;	Golgi organization;Golgi ribbon formation;Golgi to plasma membrane protein transport;cell death;cellular protein localization;protein targeting to Golgi;signal transduction;	Golgi apparatus;cytoplasm;cytoplasmic membrane-bounded vesicle;perinuclear region of cytoplasm;trans-Golgi network;			15	1	0	1	0	0	0
PANCREATIC	NM_006440	TXNRD2	10587	Q9NNW7	Thioredoxin reductase 2, mitochondrial;TXNRD2	THIOREDOXIN REDUCTASE 1, 2 (PTHR22912:SF23)	NADP binding;flavin adenine dinucleotide binding;oxidoreductase activity;protein binding;protein homodimerization activity;thioredoxin-disulfide reductase activity;	cell redox homeostasis;response to oxygen radical;response to selenium ion;	cytoplasm;mitochondrion;	dehydrogenase		13	3	0	0	0	4	0
PANCREATIC	NM_030622	CYP2S1	29785	Q96SQ9	Cytochrome P450 2S1;CYP2S1	SUBFAMILY NOT NAMED (PTHR24300:SF81)	aromatase activity;electron carrier activity;heme binding;metal ion binding;monooxygenase activity;retinoic acid 4-hydroxylase activity;	oxidation-reduction process;xenobiotic metabolic process;	endoplasmic reticulum;endoplasmic reticulum membrane;membrane;microsome;	hydroxylase		13	0	0	0	1	4	2
PANCREATIC	NM_000428	LTBP2	4053	Q14767	Latent-transforming growth factor beta-binding protein 2;LTBP2	SUBFAMILY NOT NAMED (PTHR24034:SF227)	calcium ion binding;growth factor binding;protein binding;	protein secretion;protein targeting;transforming growth factor beta receptor signaling pathway;	extracellular matrix;extracellular region;extracellular space;proteinaceous extracellular matrix;	signaling molecule		12	1	3	1	1	2	0
PANCREATIC	NM_002951	RPN2	6185	P04844	Dolichyl-diphosphooligosaccharide--protein glycosyltransferase subunit 2;RPN2	SUBFAMILY NOT NAMED (PTHR12640:SF0)	dolichyl-diphosphooligosaccharide-protein glycotransferase activity;protein binding;transferase activity;	cellular protein metabolic process;post-translational protein modification;protein N-linked glycosylation via asparagine;protein modification process;	endoplasmic reticulum;endoplasmic reticulum membrane;integral to membrane;membrane;nucleus;oligosaccharyltransferase complex;	glycosyltransferase		11	0	0	2	1	3	1
PANCREATIC	NM_005173	ATP2A3	489	Q93084	Sarcoplasmic/endoplasmic reticulum calcium ATPase 3;ATP2A3	SUBFAMILY NOT NAMED (PTHR24093:SF95)	ATP binding;calcium-transporting ATPase activity;hydrolase activity;metal ion binding;nucleotide binding;protein binding;	ATP biosynthetic process;blood coagulation;calcium ion transport;cation transport;ion transmembrane transport;platelet activation;transmembrane transport;transport;	endoplasmic reticulum;endoplasmic reticulum membrane;integral to membrane;membrane;nuclear membrane;nucleus;platelet dense tubular network membrane;sarcoplasmic reticulum;sarcoplasmic reticulum membrane;	cation transporter		11	3	0	1	0	0	1
PANCREATIC	NM_006289	TLN1	7094	Q9Y490	Talin-1;TLN1	SUBFAMILY NOT NAMED (PTHR19981:SF3)	LIM domain binding;actin binding;insulin receptor binding;protein binding;structural constituent of cytoskeleton;vinculin binding;	axon guidance;blood coagulation;cell adhesion;cell-cell junction assembly;cell-substrate junction assembly;cellular component movement;cortical actin cytoskeleton organization;cytoskeletal anchoring at plasma membrane;muscle contraction;platelet activation;platelet degranulation;	actin cytoskeleton;cell-cell junction;centrosome;cytoplasm;cytosol;extracellular region;focal adhesion;intracellular membrane-bounded organelle;plasma membrane;ruffle;ruffle membrane;	actin family cytoskeletal protein	Integrin signalling pathway->Talin;;	11	1	1	2	0	2	0
PANCREATIC	NM_006762	LAPTM5	7805	Q13571	Lysosomal-associated transmembrane protein 5;LAPTM5	LYSOSOMAL-ASSOCIATED PROTEIN TRANSMEMBRANE 5 (PTHR12479:SF2)	0	transport;	integral to plasma membrane;lysosomal membrane;lysosome;membrane;	transporter		11	1	1	1	0	1	0
PANCREATIC	NM_002249	KCNN3	3782	Q9UGI6	Small conductance calcium-activated potassium channel protein 3;KCNN3	SMALL CONDUCTANCE CALCIUM-ACTIVATED POTASSIUM CHANNEL PROTEIN 3 (PTHR10153:SF22)	calmodulin binding;ion channel activity;small conductance calcium-activated potassium channel activity;	ion transport;potassium ion transport;	integral to membrane;membrane;	potassium channel		10	4	0	1	0	3	1
PANCREATIC	NM_138573	NRG4	145957	Q8WWG1	Neuregulin-4;NRG4	SUBFAMILY NOT NAMED (PTHR11100:SF9)	growth factor activity;	0	extracellular region;integral to membrane;plasma membrane;	growth factor		10	3	0	1	0	7	0
PANCREATIC	NM_022551	RPS18	6222	P62269	40S ribosomal protein S18;RPS18	40S RIBOSOMAL PROTEIN S18 (PTHR10871:SF2)	molecular_function;rRNA binding;structural constituent of ribosome;	cellular protein metabolic process;endocrine pancreas development;gene expression;ribosome biogenesis;translation;translational elongation;translational termination;viral infectious cycle;viral reproduction;viral transcription;	cytoplasm;cytosol;cytosolic small ribosomal subunit;intracellular;ribosome;small ribosomal subunit;	ribosomal protein		9	1	2	1	0	3	0
PANCREATIC	NM_000365	TPI1	7167	P60174	Triosephosphate isomerase;TPI1	SUBFAMILY NOT NAMED (PTHR21139:SF0)	isomerase activity;triose-phosphate isomerase activity;	carbohydrate metabolic process;embryo development;fatty acid biosynthetic process;gluconeogenesis;glucose metabolic process;glyceraldehyde-3-phosphate metabolic process;glycolysis;pentose-phosphate shunt;	cytosol;nucleus;soluble fraction;	isomerase		8	3	0	0	0	3	0
PANCREATIC	NM_002560	P2RX4	5025	Q99571	P2X purinoceptor 4;P2RX4	P2X PURINOCEPTOR 4 (PTHR10125:SF18)	ATP binding;cadherin binding;copper ion binding;drug binding;extracellular ATP-gated cation channel activity;ion channel activity;protein homodimerization activity;purinergic nucleotide receptor activity;receptor activity;receptor binding;zinc ion binding;	endothelial cell activation;ion transport;membrane depolarization;negative regulation of cardiac muscle hypertrophy;positive regulation of calcium ion transport;positive regulation of calcium ion transport into cytosol;positive regulation of calcium-mediated signaling;positive regulation of nitric oxide biosynthetic process;positive regulation of prostaglandin secretion;protein homooligomerizatio…	apical part of cell;axon;cell junction;dendritic spine;integral to plasma membrane;membrane;neuronal cell body;perinuclear region of cytoplasm;plasma membrane;postsynaptic density;synapse;terminal button;	ligand-gated ion channel		8	0	0	0	0	0	0
PANCREATIC	NM_003563	SPOP	8405	O43791	Speckle-type POZ protein;SPOP	SUBFAMILY NOT NAMED (PTHR24413:SF176)	protein binding;	mRNA processing;	nucleus;	transcription cofactor		8	1	0	3	0	2	0
PANCREATIC	NM_014625	NPHS2	7827	Q9NP85	Podocin;NPHS2	PODOCIN (PTHR10264:SF23)	protein binding;	excretion;	integral to plasma membrane;membrane;plasma membrane;	cytoskeletal protein		8	0	0	0	0	0	0
PANCREATIC	NM_018685	ANLN	54443	Q9NQW6	Actin-binding protein anillin;ANLN	SUBFAMILY NOT NAMED (PTHR21538:SF12)	actin binding;protein binding;	cell cycle;cytokinesis;mitosis;regulation of exit from mitosis;septin ring assembly;	actin cytoskeleton;actomyosin contractile ring;cell cortex;cytoplasm;nucleus;			8	1	0	3	0	1	1
PANCREATIC	NM_014026	DCPS	28960	Q96C86	Scavenger mRNA-decapping enzyme DcpS;DCPS	SUBFAMILY NOT NAMED (PTHR12978:SF0)	exoribonuclease activity;hydrolase activity;protein binding;	RNA metabolic process;deadenylation-dependent decapping of nuclear-transcribed mRNA;exonucleolytic nuclear-transcribed mRNA catabolic process involved in deadenylation-dependent decay;mRNA metabolic process;nuclear-transcribed mRNA catabolic process, deadenylation-dependent decay;nuclear-transcribed mRNA catabolic process, nonsense-mediated decay;	cytoplasm;cytosol;nucleus;	hydrolase		7	0	0	0	0	1	0
PANCREATIC	NM_001365	DLG4	1742	Q15334	Lethal(2) giant larvae protein homolog 1;LLGL1	LETHAL(2) GIANT LARVAE PROTEIN HOMOLOG 1 (PTHR10241:SF21)	protein C-terminus binding;protein binding;	axon guidance;learning;nervous system development;protein complex assembly;signal transduction;synaptic transmission;	cell junction;cortical cytoskeleton;endocytic vesicle membrane;neuron spine;plasma membrane;postsynaptic density;postsynaptic membrane;synapse;synaptosome;	membrane trafficking regulatory protein		6	0	0	1	0	0	0
PANCREATIC	NM_001894	CSNK1E	1454	P49674	Casein kinase I isoform epsilon;CSNK1E	CASEIN KINASE (PTHR11909:SF18)	ATP binding;nucleotide binding;protein binding;protein kinase activity;protein serine/threonine kinase activity;	DNA repair;G2/M transition of mitotic cell cycle;cellular protein localization;mitotic cell cycle;negative regulation of Wnt receptor signaling pathway;positive regulation of canonical Wnt receptor signaling pathway;positive regulation of proteasomal ubiquitin-dependent protein catabolic process;protein phosphorylation;signal transduction;	cytoplasm;cytosol;nucleus;	protein kinase	Circadian clock system->Casine kinase I;;Wnt signaling pathway->Casein Kinase 1;;Hedgehog signaling pathway->Casine kinase I ;;Parkinson disease->Casein kinase I;;;;;	6	1	0	1	0	2	0
PANCREATIC	NM_002197	ACO1	48	P21399	Cytoplasmic aconitate hydratase;ACO1	ACONITASE (PTHR11670:SF1)	4 iron, 4 sulfur cluster binding;RNA binding;aconitate hydratase activity;citrate hydro-lyase (cis-aconitate-forming) activity;iron-responsive element binding;isocitrate hydro-lyase (cis-aconitate-forming) activity;lyase activity;metal ion binding;protein binding;	cellular iron ion homeostasis;citrate metabolic process;intestinal absorption;metabolic process;post-embryonic development;regulation of gene expression;regulation of translation;response to iron(II) ion;tricarboxylic acid cycle;	Golgi apparatus;cytoplasm;cytosol;endoplasmic reticulum;mitochondrion;	dehydratase	Methylcitrate cycle->Aconitase;;	6	0	0	0	0	0	0
PANCREATIC	NM_002948	RPL15	6138	P61313	60S ribosomal protein L15;RPL15	SUBFAMILY NOT NAMED (PTHR11847:SF3)	RNA binding;structural constituent of ribosome;	cellular protein metabolic process;endocrine pancreas development;gene expression;translation;translational elongation;translational termination;viral infectious cycle;viral reproduction;viral transcription;	cytosol;intracellular;ribosome;	ribosomal protein		6	2	0	0	0	1	0
PANCREATIC	NM_003299	HSP90B1	7184	P14625	Endoplasmin;HSP90B1	ENDOPLASMIN (PTHR11528:SF21)	ATP binding;RNA binding;calcium ion binding;low-density lipoprotein particle receptor binding;nucleotide binding;protein binding;protein phosphatase binding;unfolded protein binding;virion binding;	ER-associated protein catabolic process;actin rod assembly;anti-apoptosis;cellular response to ATP;protein folding;protein transport;regulation of phosphoprotein phosphatase activity;response to hypoxia;sequestering of calcium ion;	cytosol;endoplasmic reticulum;endoplasmic reticulum lumen;endoplasmic reticulum membrane;melanosome;microsome;midbody;perinuclear region of cytoplasm;plasma membrane part;	Hsp90 family chaperone		6	1	0	0	0	0	0
PANCREATIC	NM_006364	SEC23A	10484	Q15436	Protein transport protein Sec23A;SEC23A	SUBFAMILY NOT NAMED (PTHR11141:SF0)	protein binding;zinc ion binding;	COPII vesicle coating;ER to Golgi vesicle-mediated transport;cellular membrane organization;cellular protein metabolic process;intracellular protein transport;post-translational protein modification;protein N-linked glycosylation via asparagine;vesicle-mediated transport;	COPII vesicle coat;ER to Golgi transport vesicle membrane;Golgi apparatus;Golgi membrane;cytosol;endoplasmic reticulum;endoplasmic reticulum membrane;membrane;perinuclear region of cytoplasm;smooth endoplasmic reticulum membrane;	G-protein modulator		6	1	0	0	0	1	0
PANCREATIC	NM_000313	PROS1	5627	P07225	Vitamin K-dependent protein S;PROS1	SUBFAMILY NOT NAMED (PTHR24040:SF16)	calcium ion binding;endopeptidase inhibitor activity;	blood coagulation;cellular protein metabolic process;leukocyte migration;negative regulation of endopeptidase activity;peptidyl-glutamic acid carboxylation;platelet activation;platelet degranulation;post-translational protein modification;proteolysis;	Golgi lumen;Golgi membrane;endoplasmic reticulum membrane;extracellular region;platelet alpha granule lumen;		Blood coagulation->Protein S;;	5	2	0	0	0	0	0
PANCREATIC	NM_001028	RPS25	6230	P62851	40S ribosomal protein S25;RPS25	SUBFAMILY NOT NAMED (PTHR12850:SF4)	RNA binding;protein binding;	cellular protein metabolic process;endocrine pancreas development;gene expression;translation;translational elongation;translational termination;viral infectious cycle;viral reproduction;viral transcription;	cytoplasm;cytosol;cytosolic small ribosomal subunit;nucleolus;ribosome;small ribosomal subunit;			5	0	0	0	0	0	0
PANCREATIC	NM_001405	EFNA2	1943	O43921	Ephrin-A2;EFNA2	SUBFAMILY NOT NAMED (PTHR11304:SF28)	ephrin receptor binding;	axon guidance;cell-cell signaling;olfactory bulb development;	anchored to membrane;neuromuscular junction;perikaryon;plasma membrane;	membrane-bound signaling molecule		5	1	1	1	0	0	1
PANCREATIC	NM_017855	ODAM	54959	A1E959	Odontogenic ameloblast-associated protein;ODAM	SUBFAMILY NOT NAMED (PTHR16237:SF0)	0	biomineral tissue development;odontogenesis of dentine-containing tooth;	extracellular region;fibril;			5	0	0	0	0	3	0
PANCREATIC	NM_018398	CACNA2D3	55799	Q8IZS8	Voltage-dependent calcium channel subunit delta-3;CACNA2D3	VOLTAGE-DEPENDENT CALCIUM CHANNEL SUBUNIT ALPHA-2/DELTA-3 (PTHR10166:SF25)	calcium channel activity;metal ion binding;voltage-gated ion channel activity;	ion transport;	integral to membrane;membrane;	calcium channel		5	1	0	0	0	0	0
PANCREATIC	NM_052910	SLITRK1	114798	Q96PX8	SLIT and NTRK-like protein 1;SLITRK1	SUBFAMILY NOT NAMED (PTHR24373:SF157)	0	axonogenesis;	integral to membrane;membrane;	receptor		5	0	0	0	0	1	0
PANCREATIC	NM_000832	GRIN1	2902	Q7Z2K8	G protein-regulated inducer of neurite outgrowth 1;GPRIN1	SUBFAMILY NOT NAMED (PTHR12239:SF2)	N-methyl-D-aspartate selective glutamate receptor activity;calcium channel activity;calcium ion binding;calmodulin binding;extracellular-glutamate-gated ion channel activity;glutamate binding;glycine binding;protein binding;receptor activity;receptor binding;transporter activity;	adult locomotory behavior;calcium ion homeostasis;calcium ion transmembrane transport;cation transport;cellular calcium ion homeostasis;cerebral cortex development;conditioned taste aversion;ionotropic glutamate receptor signaling pathway;long-term memory;male mating behavior;negative regulation of neuron apoptosis;olfactory learning;pons maturation;positive regulation of apoptosis;positive regul…	N-methyl-D-aspartate selective glutamate receptor complex;cell junction;cytoplasm;dendrite;dendritic spine;integral to plasma membrane;outer membrane-bounded periplasmic space;plasma membrane;postsynaptic density;postsynaptic membrane;synapse;synaptic vesicle;synaptosome;			4	1	0	0	0	1	0
PANCREATIC	NM_004570	PIK3C2G	5288	O75747	Phosphatidylinositol-4-phosphate 3-kinase C2 domain-containing gamma polypeptide;PIK3C2G	PHOSPHATIDYLINOSITOL-4-PHOSPHATE 3-KINASE C2 DOMAIN-CONTAINING GAMMA POLYPEPTIDE (PTHR10048:SF29)	1-phosphatidylinositol-3-kinase activity;ATP binding;nucleotide binding;phosphatidylinositol binding;phosphatidylinositol phosphate kinase activity;phosphatidylinositol-4-phosphate 3-kinase activity;	biological_process;cell communication;phosphatidylinositol phosphorylation;phosphatidylinositol-mediated signaling;	membrane;phosphatidylinositol 3-kinase complex;	kinase	Inflammation mediated by chemokine and cytokine signaling pathway->Phosphoinositide 3-kinase;;VEGF signaling pathway->Phosphatidylinositol 3-Kinase;;Angiogenesis->Phosphatidylinositol 3-Kinase;;Integrin signalling pathway->Phosphatidylinositol-3-kinase;;T cell activation->PI3K;;Hypoxia response via HIF activation->phosphoinositide-3-kinase;;Insulin/IGF pathway-protein kinase B signaling cascade->…	4	1	1	2	1	1	0
PANCREATIC	NM_005630	SLCO2A1	6578	Q92959	Solute carrier organic anion transporter family member 2A1;SLCO2A1	ORGANIC ANION TRANSPORTER 2A (PTHR11388:SF14)	lipid transporter activity;prostaglandin transmembrane transporter activity;protein binding;transporter activity;	lipid transport;prostaglandin transport;sodium-independent organic anion transport;transmembrane transport;	integral to plasma membrane;membrane fraction;plasma membrane;	transporter		4	1	0	0	0	0	0
PANCREATIC	NM_000718	CACNA1B	774	Q00975	Voltage-dependent N-type calcium channel subunit alpha-1B;CACNA1B	VOLTAGE-DEPENDENT N-TYPE CALCIUM CHANNEL SUBUNIT ALPHA-1B (PTHR10037:SF131)	ATP binding;nucleotide binding;protein C-terminus binding;protein binding;voltage-gated calcium channel activity;voltage-gated ion channel activity;	ion transport;membrane depolarization;regulation of calcium ion transport via voltage-gated calcium channel activity;synaptic transmission;transmembrane transport;transport;	integral to membrane;plasma membrane;voltage-gated calcium channel complex;	calcium channel	Metabotropic glutamate receptor group III pathway->Calcium Channel;;Heterotrimeric G-protein signaling pathway-Gq alpha and Go alpha mediated pathway->Calcium ion channel;;Thyrotropin-releasing hormone receptor signaling pathway->Ca2+ channel;;Metabotropic glutamate receptor group II pathway->Calcium Channel;;Endogenous_cannabinoid_signaling->Voltage-dependent Ca channel;;Ionotropic glutamate rec…	3	0	0	0	0	0	0
PANCREATIC	NM_000808	GABRA3	2556	P34903	Gamma-aminobutyric acid receptor subunit alpha-3;GABRA3	GAMMA-AMINOBUTYRIC-ACID RECEPTOR A ALPHA SUBUNIT 1, 2, 3, 4, 5, 6 (PTHR18945:SF23)	GABA-A receptor activity;benzodiazepine receptor activity;chloride channel activity;extracellular ligand-gated ion channel activity;ion channel activity;protein binding;receptor activity;	gamma-aminobutyric acid signaling pathway;ion transmembrane transport;synaptic transmission;transmembrane transport;transport;	cell junction;chloride channel complex;integral to plasma membrane;plasma membrane;postsynaptic membrane;synapse;	ligand-gated ion channel		3	1	0	0	0	0	0
PANCREATIC	NM_001008494	ISX	91464	Q2M1V0	Intestine-specific homeobox;ISX	SUBFAMILY NOT NAMED (PTHR24329:SF78)	sequence-specific DNA binding;sequence-specific DNA binding transcription factor activity;	0	nucleus;	homeobox transcription factor		3	0	0	0	0	0	0
PANCREATIC	NM_001850	COL8A1	1295	P27658	Collagen alpha-1(VIII) chain;COL8A1	SUBFAMILY NOT NAMED (PTHR24023:SF91)	0	angiogenesis;camera-type eye morphogenesis;cell adhesion;epithelial cell proliferation;positive regulation of cell-substrate adhesion;	basement membrane;collagen;collagen type VIII;extracellular matrix;extracellular region;	peptide hormone	Integrin signalling pathway->Collagen;;	3	1	0	0	0	0	0
PANCREATIC	NM_001888	CRYM	1428	Q14894	Mu-crystallin homolog;CRYM	MU-CRYSTALLIN (PTHR13812:SF3)	NADP binding;binding;protein homodimerization activity;thyroid hormone binding;transcription corepressor activity;	negative regulation of transcription from RNA polymerase II promoter;sensory perception of sound;thyroid hormone transport;	cytoplasm;nucleolus;nucleus;plasma membrane;	lyase		3	1	0	0	0	0	0
PANCREATIC	NM_005240	ETV3	2117	P41162	ETS translocation variant 3;ETV3	PE-1 (PTHR11849:SF30)	molecular_function;sequence-specific DNA binding;sequence-specific DNA binding transcription factor activity;	biological_process;negative regulation of transcription from RNA polymerase II promoter;	nucleus;transcriptional repressor complex;	transcription factor	PDGF signaling pathway->Ets;;	3	1	0	1	0	0	0
PANCREATIC	NM_006214	PHYH	5264	O14832	Phytanoyl-CoA dioxygenase, peroxisomal;PHYH	SUBFAMILY NOT NAMED (PTHR21308:SF0)	L-ascorbic acid binding;catalytic activity;electron carrier activity;metal ion binding;oxidoreductase activity;oxidoreductase activity, acting on single donors with incorporation of molecular oxygen, incorporation of two atoms of oxygen;phytanoyl-CoA dioxygenase activity;protein binding;	cellular lipid metabolic process;fatty acid alpha-oxidation;lipid metabolic process;nervous system development;	mitochondrion;peroxisomal matrix;peroxisome;	hydroxylase		3	0	0	0	0	0	0
PANCREATIC	NM_006397	RNASEH2A	10535	O75792	Ribonuclease H2 subunit A;RNASEH2A	RIBONUCLEASE H2 SUBUNIT A (PTHR10954:SF7)	RNA binding;endonuclease activity;hydrolase activity;metal ion binding;ribonuclease H activity;ribonuclease activity;	DNA replication;RNA catabolic process;	nucleus;ribonuclease H2 complex;	endoribonuclease		3	1	0	0	0	1	0
PANCREATIC	NM_006501	MOBP	4336	Q13875	Myelin-associated oligodendrocyte basic protein;MOBP	MOBP (PTHR14555:SF2)	0	nervous system development;	cytoplasm;intracellular membrane-bounded organelle;nucleolus;nucleus;perinuclear region of cytoplasm;soluble fraction;	G-protein modulator		3	0	0	0	0	0	0
PANCREATIC	NM_014371	AKAP8L	26993	Q9ULX6	A-kinase anchor protein 8-like;AKAP8L	A-KINASE ANCHOR PROTEIN 8 (PTHR12190:SF4)	DEAD/H-box RNA helicase binding;DNA binding;metal ion binding;protein binding;zinc ion binding;	biological_process;	cytoplasm;intracellular;nuclear matrix;nucleus;			3	0	0	1	0	0	0
PANCREATIC	NM_020204	LHX9	56956	Q9NQ69	LIM/homeobox protein Lhx9;LHX9	SUBFAMILY NOT NAMED (PTHR24208:SF31)	metal ion binding;sequence-specific DNA binding;sequence-specific DNA binding transcription factor activity;transcription corepressor activity;zinc ion binding;	cell proliferation;female gonad development;gonad morphogenesis;male gonad development;motor axon guidance;negative regulation of transcription, DNA-dependent;	nucleus;	homeobox transcription factor		3	2	1	0	1	0	0
PANCREATIC	NM_133640	MED22	6837	Q15528	Mediator of RNA polymerase II transcription subunit 22;MED22	SUBFAMILY NOT NAMED (PTHR12434:SF5)	protein binding;	regulation of transcription from RNA polymerase II promoter;	cytoplasm;mediator complex;nucleus;soluble fraction;			3	0	0	0	0	0	0
PANCREATIC	XM_372231	ERCC6L	54821	Q2NKX8	DNA excision repair protein ERCC-6-like;ERCC6L	DNA EXCISION REPAIR PROTEIN ERCC-6-LIKE (PTHR10799:SF67)	ATP binding;DNA binding;helicase activity;hydrolase activity;nucleotide binding;protein binding;	M phase of mitotic cell cycle;cell division;mitotic cell cycle;mitotic prometaphase;	chromosome;condensed chromosome kinetochore;cytosol;	DNA helicase		3	0	0	2	0	0	0
PANCREATIC	XM_376232	VPRBP	9730	Q9Y4B6	Protein VPRBP;VPRBP	SUBFAMILY NOT NAMED (PTHR13129:SF4)	protein binding;	interspecies interaction between organisms;	cytoplasm;nucleus;signalosome;			3	1	0	1	0	0	0
PANCREATIC	NM_001303	COX10	1352	Q12887	Protoheme IX farnesyltransferase, mitochondrial;COX10	PROTOHEME IX FARNESYLTRANSFERASE (PTHR11048:SF3)	cytochrome-c oxidase activity;farnesyltranstransferase activity;protoheme IX farnesyltransferase activity;transferase activity;	aerobic respiration;cellular respiration;cytochrome complex assembly;heme O biosynthetic process;heme a biosynthetic process;mitochondrial electron transport, cytochrome c to oxygen;mitochondrial fission;respiratory chain complex IV assembly;	integral to membrane;membrane;mitochondrial membrane;mitochondrion;	acyltransferase	Heme biosynthesis->Protoheme IX farnesyl transferase;;	2	1	0	1	0	0	0
PANCREATIC	NM_002120	HLA-DOB	3112	P13765	HLA class II histocompatibility antigen, DO beta chain;HLA-DOB	MHC CLASS II BETA CHAIN (PTHR19944:SF26)	MHC class II receptor activity;	T cell costimulation;T cell receptor signaling pathway;antigen processing and presentation of peptide or polysaccharide antigen via MHC class II;cytokine-mediated signaling pathway;immune response;interferon-gamma-mediated signaling pathway;	MHC class II protein complex;endosome;endosome membrane;integral to membrane;lysosomal membrane;lysosome;plasma membrane;	major histocompatibility complex antigen		2	0	0	0	0	0	0
PANCREATIC	NM_002861	PCYT2	5833	Q99447	Ethanolamine-phosphate cytidylyltransferase;PCYT2	ETHANOLAMINE-PHOSPHATE CYTIDYLYLTRANSFERASE (PTHR10739:SF14)	ethanolamine-phosphate cytidylyltransferase activity;nucleotidyltransferase activity;transferase activity;	biosynthetic process;phospholipid biosynthetic process;	cellular_component;	nucleotidyltransferase		2	0	0	0	0	2	0
PANCREATIC	NM_003042	SLC6A1	6529	P30531	Sodium- and chloride-dependent GABA transporter 1;SLC6A1	SODIUM- AND CHLORIDE-DEPENDENT GABA TRANSPORTER 1 (PTHR11616:SF31)	gamma-aminobutyric acid:sodium symporter activity;neurotransmitter:sodium symporter activity;symporter activity;	gamma-aminobutyric acid import;learning;negative regulation of synaptic transmission, GABAergic;neurotransmitter secretion;protein homooligomerization;response to calcium ion;response to cocaine;response to estradiol stimulus;response to lead ion;response to organic nitrogen;response to purine-containing compound;response to sucrose stimulus;response to toxin;synaptic transmission;transmembrane t…	axon;integral to membrane;integral to plasma membrane;membrane fraction;plasma membrane;synaptosome;	amino acid transporter		2	0	0	0	0	0	0
PANCREATIC	NM_005277	GPM6A	2823	P51674	Neuronal membrane glycoprotein M6-a;GPM6A	MYELIN PROTEOLIPID DMBETA (PTHR11683:SF4)	calcium channel activity;	0	cell surface;integral to membrane;membrane;	myelin protein		2	0	0	1	0	0	0
PANCREATIC	NM_006279	ST3GAL3	6487	Q11203	CMP-N-acetylneuraminate-beta-1,4-galactoside alpha-2,3-sialyltransferase;ST3GAL3	CMP-N-ACETYLNEURAMINATE-BETA-1,4-GALACTOSIDE ALPHA-2,3- SIALYLTRANSFERASE (N-ACETYLLACTOSAMINIDE ALPHA-2,3- SIALYLTRANSFERASE) (PTHR13713:SF6)	N-acetyllactosaminide alpha-2,3-sialyltransferase activity;	protein glycosylation;	Golgi apparatus;Golgi cisterna membrane;extracellular region;integral to Golgi membrane;integral to membrane;membrane;	glycosyltransferase		2	0	0	0	0	0	0
PANCREATIC	NM_006377	UNC13B	10497	O14795	Protein unc-13 homolog B;UNC13B	PROTEIN UNC-13 HOMOLOG B (PTHR10480:SF0)	metal ion binding;receptor activity;signal transducer activity;	excretion;exocytosis;induction of apoptosis;intracellular signal transduction;signal transduction;synaptic transmission;synaptic vesicle priming;	Golgi apparatus;cell junction;cytoplasm;plasma membrane;synapse;	receptor	Synaptic_vesicle_trafficking->Munc13;;	2	0	0	0	0	0	1
PANCREATIC	NM_007101	SARDH	1757	Q9UL12	Sarcosine dehydrogenase, mitochondrial;SARDH	SARCOSINE DEHYDROGENASE (PTHR13847:SF18)	aminomethyltransferase activity;flavin adenine dinucleotide binding;oxidoreductase activity;sarcosine dehydrogenase activity;	glycine catabolic process;	cytoplasm;mitochondrial matrix;mitochondrion;	dehydrogenase		2	1	0	0	0	0	0
PANCREATIC	NM_016208	VPS28	51160	Q9UK41	Vacuolar protein sorting-associated protein 28 homolog;VPS28	SUBFAMILY NOT NAMED (PTHR12937:SF0)	protein binding;	cellular membrane organization;endosome transport;negative regulation of protein ubiquitination;protein transport;	cytoplasm;cytosol;endosome;endosome membrane;late endosome membrane;plasma membrane;			2	0	0	1	0	0	0
PANCREATIC	NM_017512	ENOSF1	55556	Q7L5Y1	Mitochondrial enolase superfamily member 1;ENOSF1	MANDELATE RACEMASE (PTHR13794:SF2)	isomerase activity;metal ion binding;molecular_function;	biological_process;cellular amino acid catabolic process;	cellular_component;mitochondrion;	dehydratase		2	0	0	0	0	0	0
PANCREATIC	NM_031206	LAS1L	81887	Q9Y4W2	LAS1-like protein;LAS1L	SUBFAMILY NOT NAMED (PTHR15002:SF0)	protein binding;	0	MLL1 complex;nucleolus;nucleus;			2	2	1	0	0	0	1
PANCREATIC	NM_145263	SPATA18	132671	Q8TC71	Spermatogenesis-associated protein 18;SPATA18	SUBFAMILY NOT NAMED (PTHR21771:SF0)	protein binding;	cellular response to stress;mitochondrial protein catabolic process;mitochondrion degradation by induced vacuole formation;response to DNA damage stimulus;	axoneme part;cytoplasm;intracellular membrane-bounded organelle;membrane;mitochondrial outer membrane;mitochondrion;			2	0	0	1	0	0	0
PANCREATIC	NM_000864	HTR1D	3352	P28221	5-hydroxytryptamine receptor 1D;HTR1D	SUBFAMILY NOT NAMED (PTHR24247:SF66)	G-protein coupled receptor activity;receptor activity;serotonin binding;serotonin receptor activity;	G-protein signaling, coupled to cyclic nucleotide second messenger;intestine smooth muscle contraction;response to toxin;serotonin receptor signaling pathway;synaptic transmission;	integral to plasma membrane;plasma membrane;	G-protein coupled receptor	Heterotrimeric G-protein signaling pathway-Gi alpha and Gs alpha mediated pathway->Gi protein coupled receptor;;Heterotrimeric G-protein signaling pathway-Gi alpha and Gs alpha mediated pathway->Gs-protein coupled receptor;;5HT1 type receptor mediated signaling pathway->5HT1 Receptor;;;;	1	1	0	1	0	0	0
PANCREATIC	NM_001003656	PPP2R2D	55844	Q66LE6	Serine/threonine-protein phosphatase 2A 55 kDa regulatory subunit B delta isoform;PPP2R2D	SUBFAMILY NOT NAMED (PTHR11871:SF0)	protein phosphatase type 2A regulator activity;	cell cycle;cell division;exit from mitosis;mitosis;signal transduction;	cytoplasm;protein phosphatase type 2A complex;	protein phosphatase	FGF signaling pathway->protein phosphatase 2A;;	1	0	0	0	0	0	0
PANCREATIC	NM_003950	F2RL3	9002	Q96RI0	Proteinase-activated receptor 4;F2RL3	SUBFAMILY NOT NAMED (PTHR24232:SF145)	G-protein coupled receptor activity;receptor activity;thrombin receptor activity;	G-protein coupled receptor protein signaling pathway;activation of phospholipase C activity by G-protein coupled receptor protein signaling pathway coupled to IP3 second messenger;blood coagulation;platelet activation;platelet dense granule organization;positive regulation of release of sequestered calcium ion into cytosol;response to wounding;signal transduction;thrombin receptor signaling pathw…	extracellular region;integral to plasma membrane;plasma membrane;	G-protein coupled receptor	Blood coagulation->Protease-activated receptor4;;	1	0	0	0	0	0	0
PANCREATIC	NM_004694	SLC16A6	9120	O15403	Monocarboxylate transporter 7;SLC16A6	MONOCARBOXYLATE TRANSPORTER 7 (MCT 7) (PTHR11360:SF20)	monocarboxylic acid transmembrane transporter activity;symporter activity;	monocarboxylic acid transport;transmembrane transport;	integral to plasma membrane;membrane fraction;plasma membrane;	transporter		1	1	0	0	0	1	0
PANCREATIC	NM_005267	GJA8	2703	P48165	Gap junction alpha-8 protein;GJA8	GAP JUNCTION ALPHA-8 PROTEIN (CONNEXIN 50) (PTHR11984:SF19)	channel activity;	cell communication;lens development in camera-type eye;transport;visual perception;	cell junction;connexon complex;integral to plasma membrane;plasma membrane;	gap junction		1	0	0	0	0	0	0
PANCREATIC	NM_005339	UBE2K	3093	P61086	Ubiquitin-conjugating enzyme E2 K;UBE2K	SUBFAMILY NOT NAMED (PTHR24067:SF28)	ATP binding;acid-amino acid ligase activity;ligase activity;nucleotide binding;protein binding;ubiquitin protein ligase binding;ubiquitin-protein ligase activity;ubiquitin-ubiquitin ligase activity;	protein K48-linked ubiquitination;protein ubiquitination;ubiquitin-dependent protein catabolic process;	cytoplasm;	transfer/carrier protein	Ubiquitin proteasome pathway->Ubiquitin-conjugating enzyme E2;;Ubiquitin proteasome pathway->Ubiquitin protein ligase E3;;;	1	0	0	1	0	0	0
PANCREATIC	NM_006778	TRIM10	10107	Q9UDY6	Tripartite motif-containing protein 10;TRIM10		metal ion binding;molecular_function;zinc ion binding;	biological_process;erythrocyte differentiation;	cytoplasm;intracellular;			1	0	0	0	0	0	0
PANCREATIC	NM_007357	COG2	22796	Q14746	Conserved oligomeric Golgi complex subunit 2;COG2	SUBFAMILY NOT NAMED (PTHR12961:SF0)	protein binding;protein transporter activity;	Golgi organization;intra-Golgi vesicle-mediated transport;intracellular protein transport;oligosaccharide biosynthetic process;protein glycosylation;protein transport;	Golgi apparatus;Golgi membrane;Golgi stack;Golgi transport complex;membrane;			1	0	0	0	0	0	0
PANCREATIC	NM_012133	COPG2	26958	Q9UBF2	Coatomer subunit gamma-2;COPG2	COATOMER SUBUNIT GAMMA-2 (PTHR10261:SF2)	protein binding;structural molecule activity;	intra-Golgi vesicle-mediated transport;intracellular protein transport;retrograde vesicle-mediated transport, Golgi to ER;vesicle-mediated transport;	COPI vesicle coat;Golgi apparatus;Golgi membrane;Golgi-associated vesicle;cytoplasm;cytoplasmic vesicle;membrane;membrane coat;	vesicle coat protein		1	0	0	0	0	0	0
PANCREATIC	NM_015414	RPL36	25873	Q9Y3U8	60S ribosomal protein L36;RPL36	60S RIBOSOMAL PROTEIN L36 (PTHR10114:SF0)	protein binding;structural constituent of ribosome;	cellular protein metabolic process;endocrine pancreas development;gene expression;translation;translational elongation;translational termination;viral infectious cycle;viral reproduction;viral transcription;	cytosol;cytosolic large ribosomal subunit;intracellular;nucleolus;ribosome;	ribosomal protein		1	0	0	1	0	0	0
PANCREATIC	NM_017807	OSGEP	55644	Q9NPF4	Probable O-sialoglycoprotein endopeptidase;OSGEP	SUBFAMILY NOT NAMED (PTHR11735:SF6)	metal ion binding;metalloendopeptidase activity;protein binding;	proteolysis;tRNA processing;	0	metalloprotease		1	0	0	0	0	0	0
PANCREATIC	NM_018230	NUP133	55746	Q8WUM0	Nuclear pore complex protein Nup133;NUP133	SUBFAMILY NOT NAMED (PTHR13405:SF8)	nucleocytoplasmic transporter activity;protein binding;	M phase of mitotic cell cycle;carbohydrate metabolic process;glucose transport;hexose transport;mRNA export from nucleus;mitotic cell cycle;mitotic prometaphase;nuclear pore organization;paraxial mesoderm development;protein transport;regulation of glucose transport;transmembrane transport;viral reproduction;	Nup107-160 complex;chromosome;condensed chromosome kinetochore;condensed chromosome outer kinetochore;cytosol;nuclear envelope;nuclear pore;nucleus;			1	0	0	0	0	1	0
PANCREATIC	NM_018233	OGFOD1	55239	Q8N543	2-oxoglutarate and iron-dependent oxygenase domain-containing protein 1;OGFOD1	SUBFAMILY NOT NAMED (PTHR12117:SF0)	L-ascorbic acid binding;iron ion binding;metal ion binding;oxidoreductase activity, acting on paired donors, with incorporation or reduction of molecular oxygen, 2-oxoglutarate as one donor, and incorporation of one atom each of oxygen into both donors;oxidoreductase activity, acting on single donors with incorporation of molecular oxygen, incorporation of two atoms of oxygen;	0	0	transferase		1	0	0	0	0	0	0
PANCREATIC	NM_020363	DAZ2	57055	Q13117	Deleted in azoospermia protein 2;DAZ2	DELETED IN AZOOSPERMIA PROTEIN (PTHR11176:SF4)	RNA binding;nucleotide binding;	cell differentiation;multicellular organismal development;single fertilization;spermatogenesis;	cytoplasm;nucleus;	RNA binding protein		1	0	0	0	0	0	0
PANCREATIC	NM_021116	ADCY1	107	Q08828	Adenylate cyclase type 1;ADCY1	ADENYLATE CYCLASE TYPE 1 (PTHR11920:SF20)	ATP binding;adenylate cyclase activity;calcium- and calmodulin-responsive adenylate cyclase activity;calmodulin binding;metal ion binding;nucleotide binding;	activation of adenylate cyclase activity by G-protein signaling pathway;activation of phospholipase C activity;activation of protein kinase A activity;axonogenesis;cAMP biosynthetic process;cellular response to glucagon stimulus;energy reserve metabolic process;inhibition of adenylate cyclase activity by G-protein signaling pathway;intracellular signal transduction;long-term memory;nerve growth f…	integral to membrane;plasma membrane;	adenylate cyclase	Endothelin signaling pathway->3',5'-cyclic AMP synthetase;;GABA-B_receptor_II_signaling->Adenylate cyclase;;Heterotrimeric G-protein signaling pathway-Gi alpha and Gs alpha mediated pathway->Adenylyl cyclase;;;;	1	0	0	0	0	0	0
PANCREATIC	NM_021253	TRIM39	56658	Q9HCM9	Tripartite motif-containing protein 39;TRIM39	SUBFAMILY NOT NAMED (PTHR24103:SF107)	identical protein binding;metal ion binding;molecular_function;protein binding;zinc ion binding;	apoptosis;biological_process;	cellular_component;cytoplasm;cytosol;intracellular;mitochondrion;	ribonucleoprotein		1	0	0	0	0	0	0
PANCREATIC	NM_025158	RUFY1	80230	Q96T51	RUN and FYVE domain-containing protein 1;RUFY1	RUN AND FYVE DOMAIN CONTAINING PROTEIN (PTHR22835:SF37)	lipid binding;metal ion binding;zinc ion binding;	endocytosis;protein transport;	cytoplasm;early endosome membrane;endosome;membrane;	zinc finger transcription factor		1	1	0	0	0	0	0
PANCREATIC	NM_032539	SLITRK2	84631	Q9H156	SLIT and NTRK-like protein 2;SLITRK2	SUBFAMILY NOT NAMED (PTHR24373:SF169)	0	axonogenesis;	integral to membrane;membrane;	receptor		1	0	0	0	0	0	0
PANCREATIC	NM_032581	FAM126A	84668	Q9BYI3	Hyccin;FAM126A		signal transducer activity;	biological_process;signal transduction;	cellular_component;cytoplasm;membrane;			1	0	0	1	0	0	0
PANCREATIC	NM_058186	FAM3B	54097	P58499	Protein FAM3B;FAM3B	SUBFAMILY NOT NAMED (PTHR14592:SF2)	cytokine activity;	apoptosis;insulin secretion;	extracellular region;extracellular space;	cytokine		1	0	0	0	0	0	1
PANCREATIC	NM_148675	DSCR9	257203	P59020	Down syndrome critical region protein 9;DSCR9		molecular_function;	biological_process;	cellular_component;			1	0	0	0	0	0	0
PANCREATIC	NM_174930	PMS2L5	5383	A8MQ11	Postmeiotic segregation increased 2-like protein 5;PMS2L5	POSTMEIOTIC SEGREGATION INCREASED 2-LIKE PROTEIN 5 (PTHR10073:SF32)	ATP binding;ATPase activity;mismatched DNA binding;	ATP catabolic process;mismatch repair;reciprocal meiotic recombination;somatic hypermutation of immunoglobulin genes;	MutLalpha complex;	DNA binding protein		1	0	0	0	0	0	0
PANCREATIC	NM_178822	IGSF10	285313	Q6WRI0	Immunoglobulin superfamily member 10;IGSF10	IMMUNOGLOBULIN SUPERFAMILY MEMBER 10 (PTHR10489:SF173)	0	cell differentiation;multicellular organismal development;ossification;tissue regeneration;	extracellular region;	immunoglobulin receptor superfamily		1	0	0	0	0	0	0
PANCREATIC	NM_182904	P4HA3	283208	Q7Z4N8	Prolyl 4-hydroxylase subunit alpha-3;P4HA3	PROLYL 4-HYDROXYLASE ALPHA SUBUNIT 3 (PTHR10869:SF14)	L-ascorbic acid binding;binding;iron ion binding;metal ion binding;oxidoreductase activity, acting on paired donors, with incorporation or reduction of molecular oxygen;oxidoreductase activity, acting on single donors with incorporation of molecular oxygen, incorporation of two atoms of oxygen;procollagen-proline 4-dioxygenase activity;	0	endoplasmic reticulum;endoplasmic reticulum lumen;	hydroxylase		1	0	0	0	0	1	0
PANCREATIC	XM_047770	ALG10B	144245	Q5I7T1	Putative alpha-1,2-glucosyltransferase ALG10-B;ALG10B	POTASSIUM CHANNEL REGULATOR 1 (PTHR12989:SF10)	dolichyl-phosphate-glucose-glycolipid alpha-glucosyltransferase activity;transferase activity, transferring hexosyl groups;	cellular protein metabolic process;dolichol-linked oligosaccharide biosynthetic process;post-translational protein modification;protein N-linked glycosylation via asparagine;	endoplasmic reticulum membrane;integral to membrane;plasma membrane;			1	0	0	0	0	0	0
PANCREATIC	NM_001002006	NT5C1B	93034	Q96P26	Cytosolic 5'-nucleotidase 1B;NT5C1B		5'-nucleotidase activity;hydrolase activity;magnesium ion binding;nucleotide binding;	nucleobase, nucleoside and nucleotide metabolic process;nucleotide metabolic process;purine base metabolic process;purine nucleotide catabolic process;	cytoplasm;cytosol;			0	0	0	0	0	0	0
PANCREATIC	NM_001002876	CENPM	79019	Q9NSP4	Centromere protein M;CENPM	SUBFAMILY NOT NAMED (PTHR14535:SF0)	0	M phase of mitotic cell cycle;mitotic cell cycle;mitotic prometaphase;	chromosome;condensed chromosome kinetochore;cytoplasm;cytosol;nucleus;			0	0	0	0	0	0	0
PANCREATIC	NM_001010914	ANKRD36C	400986	Q5JPF3	ankyrin repeat domain 36C		ion channel inhibitor activity;	0	0			0	0	0	0	0	0	0
PANCREATIC	NM_001012728	DPRX	503834	A6NFQ7	Divergent paired-related homeobox;DPRX	SUBFAMILY NOT NAMED (PTHR24329:SF260)	sequence-specific DNA binding;sequence-specific DNA binding transcription factor activity;	0	nucleus;	homeobox transcription factor		0	0	0	0	0	0	0
PANCREATIC	NM_001017992	ACTBL2	345651	Q562R1	Beta-actin-like protein 2;ACTBL2	SUBFAMILY NOT NAMED (PTHR11937:SF47)	ATP binding;nucleotide binding;	0	cytoplasm;cytoskeleton;	actin and actin related protein	Alzheimer disease-presenilin pathway->actin;;Cytoskeletal regulation by Rho GTPase->Actin;;Nicotinic acetylcholine receptor signaling pathway->Actin;;Wnt signaling pathway->NFAT Target Genes;;Integrin signalling pathway->Actin;;Cadherin signaling pathway->Filamentous F-actin;;Inflammation mediated by chemokine and cytokine signaling pathway->F-actin;;Huntington disease->Actin;;;;;;;;;	0	0	0	0	0	0	0
PANCREATIC	NM_003700	OR2D2	120776	Q9H210	Olfactory receptor 2D2;OR2D2		olfactory receptor activity;receptor activity;	response to stimulus;sensory perception of smell;	integral to membrane;plasma membrane;			0	0	0	0	0	0	0
PANCREATIC	NM_005327	HADH	3033	P40939	Long chain 3-hydroxyacyl-CoA dehydrogenase;HADHA	SUBFAMILY NOT NAMED (PTHR23309:SF0)	3-hydroxyacyl-CoA dehydrogenase activity;NAD+ binding;binding;coenzyme binding;oxidoreductase activity;	cellular lipid metabolic process;fatty acid beta-oxidation;fatty acid metabolic process;negative regulation of insulin secretion;response to activity;response to drug;response to hormone stimulus;response to insulin stimulus;	cytoplasm;mitochondrial inner membrane;mitochondrial matrix;mitochondrion;	dehydrogenase		0	0	0	0	0	0	0
PANCREATIC	NM_005584	MAB21L1	4081	Q13394	Protein mab-21-like 1;MAB21L1	CELL FATE DETERMINING PROTEIN MAB21L1 (PTHR10656:SF14)	0	anatomical structure morphogenesis;camera-type eye development;multicellular organismal development;positive regulation of cell proliferation;	nucleus;			0	0	0	0	0	0	0
PANCREATIC	NM_006455	LEPREL4	10609	Q92791	leprecan-like 4		binding;	synaptonemal complex assembly;	chromosome;condensed nuclear chromosome;nucleolus;nucleus;synaptonemal complex;			0	0	0	0	0	0	0
PANCREATIC	NM_006771	KRT38	8687	O76015	Keratin, type I cuticular Ha8;KRT38	KERATIN, TYPE I CYTOSKELETAL (PTHR23239:SF14)	structural molecule activity;	0	intermediate filament;	structural protein		0	0	0	0	0	0	0
PANCREATIC	NM_006918	SC5DL	6309	O75845	Lathosterol oxidase;SC5DL	STEROL DESATURASE (PTHR11863:SF2)	C-5 sterol desaturase activity;iron ion binding;lathosterol oxidase activity;oxidoreductase activity;	cholesterol biosynthetic process;cholesterol biosynthetic process via lathosterol;fatty acid biosynthetic process;lipid metabolic process;	endoplasmic reticulum;endoplasmic reticulum membrane;integral to membrane;membrane;microsome;	oxidase		0	0	0	0	0	0	0
PANCREATIC	NM_012161	FBXL5	26234	Q9UKA1	F-box/LRR-repeat protein 5;FBXL5	SUBFAMILY NOT NAMED (PTHR23125:SF74)	iron ion binding;metal ion binding;protein binding;ubiquitin-protein ligase activity;	SCF-dependent proteasomal ubiquitin-dependent protein catabolic process;iron ion homeostasis;protein ubiquitination;	SCF ubiquitin ligase complex;cytoplasm;perinuclear region of cytoplasm;ubiquitin ligase complex;	damaged DNA-binding protein		0	0	0	0	0	0	0
PANCREATIC	NM_012288	TRAM2	9697	Q15035	Translocation-associated membrane protein 2;TRAM2	TRANSLOCATION ASSOCIATED MEMBRANE PROTEIN 2 (PTHR12371:SF4)	protein binding;	collagen biosynthetic process;protein transport;transmembrane transport;	integral to membrane;membrane;			0	0	0	0	0	0	0
PANCREATIC	NM_013293	TRA2A	29896	Q13595	Transformer-2 protein homolog;TRA2A	SUBFAMILY NOT NAMED (PTHR15241:SF0)	RNA binding;nucleotide binding;	RNA splicing;nuclear mRNA splicing, via spliceosome;	nucleus;	mRNA processing factor		0	0	0	0	0	0	0
PANCREATIC	NM_013401	RAB3IL1	5866	Q8TBN0	Guanine nucleotide exchange factor for Rab3A;RAB3IL1	SUBFAMILY NOT NAMED (PTHR14430:SF0)	Rab guanyl-nucleotide exchange factor activity;guanyl-nucleotide exchange factor activity;protein binding;	0	0	guanyl-nucleotide exchange factor		0	0	0	0	0	0	0
PANCREATIC	NM_014519	ZNF232	7775	Q9UNY5	Zinc finger protein 232;ZNF232	ZINC FINGER PROTEIN 232 (PTHR23226:SF22)	DNA binding;metal ion binding;sequence-specific DNA binding transcription factor activity;zinc ion binding;	viral reproduction;	intracellular;nucleus;	KRAB box transcription factor		0	0	0	0	0	0	0
PANCREATIC	NM_014955	METTL13	51603	Q8N6R0	methyltransferase like 13		methyltransferase activity;protein binding;transferase activity;	metabolic process;	0			0	0	0	0	0	0	0
PANCREATIC	NM_016339	RAPGEFL1	51195	Q9UHV5	Rap guanine nucleotide exchange factor-like 1;RAPGEFL1	GUANINE NUCLEOTIDE EXCHANGE FACTOR II-RELATED (PTHR23113:SF23)	guanyl-nucleotide exchange factor activity;	G-protein coupled receptor protein signaling pathway;nervous system development;small GTPase mediated signal transduction;	intracellular;membrane fraction;	guanyl-nucleotide exchange factor		0	0	0	0	0	0	0
PANCREATIC	NM_017457	CYTH2	9266	Q99418	Cytohesin-2;CYTH2	CYTOHESIN-2 (PH, SEC7 AND COILED-COIL DOMAIN-CONTAINING PROTEIN 2)(ARF NUCLEOTIDE-BINDING SITE OPENER) (PTHR10663:SF58)	ARF guanyl-nucleotide exchange factor activity;protein binding;	actin cytoskeleton organization;endocytosis;regulation of ARF protein signal transduction;regulation of cell adhesion;	cytoplasm;intracellular;membrane fraction;plasma membrane;	guanyl-nucleotide exchange factor	Inflammation mediated by chemokine and cytokine signaling pathway->Guanine nucleotide exchange factor;;	0	0	0	0	0	0	0
PANCREATIC	NM_017658	KLHL28	54813	Q9NXS3	Kelch-like protein 28;KLHL28	SUBFAMILY NOT NAMED (PTHR24412:SF155)	0	0	0	transcription cofactor		0	0	0	0	0	0	0
PANCREATIC	NM_018170	RPRD1A	55197	Q96P16	Regulation of nuclear pre-mRNA domain-containing protein 1A;RPRD1A	SUBFAMILY NOT NAMED (PTHR12460:SF0)	0	0	0	kinase inhibitor		0	0	0	0	0	0	0
PANCREATIC	NM_018190	BBS7	55212	Q8IWZ6	Bardet-Biedl syndrome 7 protein;BBS7	SUBFAMILY NOT NAMED (PTHR16074:SF3)	protein binding;	cilium morphogenesis;determination of left/right symmetry;digestive tract morphogenesis;fat cell differentiation;heart looping;melanosome transport;pigment granule aggregation in cell center;response to stimulus;visual perception;	BBSome;centrosome;cilium;cilium membrane;cytoplasm;plasma membrane;			0	0	0	0	0	0	0
PANCREATIC	NM_018569	AP1AR	55435	Q63HQ0	adaptor-related protein complex 1		0	protein transport;	Golgi apparatus;early endosome;late endosome;transport vesicle;			0	0	0	0	0	0	0
PANCREATIC	NM_019022	TMX3	54495	Q96JJ7	thioredoxin-related transmembrane protein 3		electron carrier activity;isomerase activity;protein disulfide isomerase activity;protein disulfide oxidoreductase activity;	cell redox homeostasis;glycerol ether metabolic process;	endoplasmic reticulum;endoplasmic reticulum membrane;integral to membrane;membrane;			0	0	0	0	0	0	0
PANCREATIC	NM_020805	KLHL14	57565	Q9P2G3	Kelch-like protein 14;KLHL14	SUBFAMILY NOT NAMED (PTHR24412:SF111)	0	0	cytoplasm;cytosol;endoplasmic reticulum;endoplasmic reticulum membrane;membrane;	transcription cofactor		0	0	0	0	0	0	0
PANCREATIC	NM_021167	GATAD1	57798	Q8WUU5	GATA zinc finger domain-containing protein 1;GATAD1	SUBFAMILY NOT NAMED (PTHR13340:SF0)	metal ion binding;sequence-specific DNA binding;sequence-specific DNA binding transcription factor activity;zinc ion binding;	0	0	transcription factor		0	0	0	0	0	0	0
PANCREATIC	NM_022840	METTL4	64863	Q8N3J2	Methyltransferase-like protein 4;METTL4	SUBFAMILY NOT NAMED (PTHR14475:SF2)	methyltransferase activity;nucleic acid binding;transferase activity;	nucleobase, nucleoside, nucleotide and nucleic acid metabolic process;	0	DNA methyltransferase		0	0	0	0	0	0	0
PANCREATIC	NM_023039	ANKRA2	57763	Q9H9E1	Ankyrin repeat family A protein 2;ANKRA2	SUBFAMILY NOT NAMED (PTHR24124:SF199)	histone deacetylase binding;low-density lipoprotein particle binding;	biological_process;	cytoplasm;cytoskeleton;cytosol;membrane;membrane fraction;nucleus;	transcription factor		0	0	0	0	0	0	0
PANCREATIC	NM_024627	C22orf29	79680	Q7L3V2	Uncharacterized protein C22orf29;C22orf29	SUBFAMILY NOT NAMED (PTHR15503:SF0)	0	0	0			0	0	0	0	0	0	0
PANCREATIC	NM_030903	OR2W1	26692	Q9Y3N9	Olfactory receptor 2W1;OR2W1		olfactory receptor activity;receptor activity;	response to stimulus;sensory perception of smell;	integral to membrane;plasma membrane;			0	0	0	0	0	0	0
PANCREATIC	NM_032204	ASCC2	84164	Q9H1I8	Activating signal cointegrator 1 complex subunit 2;ASCC2	SUBFAMILY NOT NAMED (PTHR21494:SF0)	0	regulation of transcription, DNA-dependent;	0			0	0	0	0	0	0	0
PANCREATIC	NM_032806	C3orf39	84892	Q8NAT1	Uncharacterized glycosyltransferase AGO61;AGO61	SUBFAMILY NOT NAMED (PTHR20961:SF0)	transferase activity, transferring glycosyl groups;	0	extracellular region;	glycosyltransferase		0	0	0	0	0	0	0
PANCREATIC	NM_033061	KRTAP4-7	85287	Q9BYR0	Keratin-associated protein 4-7;KRTAP4-7	SUBFAMILY NOT NAMED (PTHR23262:SF0)	0	0	0	structural protein		0	0	0	0	0	0	0
PANCREATIC	NM_033113	ZNF628	89887	Q5EBL2	Zinc finger protein 628;ZNF628	SUBFAMILY NOT NAMED (PTHR24402:SF485)	DNA binding;metal ion binding;sequence-specific DNA binding transcription factor activity;zinc ion binding;	0	intracellular;nucleus;	KRAB box transcription factor		0	0	0	0	0	0	0
PANCREATIC	NM_033418	C1orf156	92342	O95568	UPF0558 protein C1orf156;C1orf156	SUBFAMILY NOT NAMED (PTHR21095:SF0)	protein methyltransferase activity;transferase activity;	0	cytoplasm;			0	0	0	0	0	0	0
PANCREATIC	NM_054031	MRGPRX3	117195	Q96LB0	Mas-related G-protein coupled receptor member X3;MRGPRX3	G-PROTEIN COUPLED RECEPTOR (MAS-RELATED NOCICEPTIVE SENSORY RECEPTOR) (PTHR11334:SF11)	G-protein coupled receptor activity;receptor activity;	0	integral to membrane;plasma membrane;	G-protein coupled receptor		0	0	0	0	0	0	0
PANCREATIC	NM_138458	WDR92	116143	Q96MX6	WD repeat-containing protein 92;WDR92	WD REPEAT-CONTAINING PROTEIN 92 (PTHR10971:SF2)	methylated histone residue binding;	apoptosis;histone lysine methylation;	0			0	0	0	0	0	0	0
PANCREATIC	NM_144713	FAM82A1	151393	Q96LZ7	Regulator of microtubule dynamics protein 2;FAM82A1	SUBFAMILY NOT NAMED (PTHR16056:SF3)	binding;	0	cytoplasm;cytoskeleton;integral to membrane;membrane;microtubule;spindle pole;			0	0	0	0	0	0	0
PANCREATIC	NM_145256	LRRC25	126364	Q8N386	Leucine-rich repeat-containing protein 25;LRRC25	SUBFAMILY NOT NAMED (PTHR20878:SF0)	0	0	integral to membrane;membrane;			0	0	0	0	0	0	0
PANCREATIC	NM_145663	DBF4B	80174	Q8NFT6	Protein DBF4 homolog B;DBF4B	ACTIVATOR OF S-PHASE KINASE-RELATED (PTHR15375:SF7)	metal ion binding;nucleic acid binding;zinc ion binding;	cell cycle;	nucleus;	kinase activator		0	0	0	0	0	0	0
PANCREATIC	NM_148897	SDR9C7	121214	Q8NEX9	short chain dehydrogenase/reductase family 9C, member 7		binding;oxidoreductase activity;	0	cytoplasm;			0	0	0	0	0	0	0
PANCREATIC	NM_152572	C9orf98	158067	Q96MA6	Putative adenylate kinase-like protein C9orf98;C9orf98	ADENYLATE KINASE (PTHR23359:SF22)	ATP binding;adenylate kinase activity;cytidylate kinase activity;nucleobase, nucleoside, nucleotide kinase activity;nucleotide binding;transferase activity;	nucleobase, nucleoside, nucleotide and nucleic acid metabolic process;	cytoplasm;cytosol;	nucleotide kinase	Salvage pyrimidine ribonucleotides->Cytidylate kinase;;De novo purine biosynthesis->Adenylate kinase;;;	0	0	0	0	0	0	0
PANCREATIC	NM_152644	FAM24B	196792	Q8N5W8	Protein FAM24B;FAM24B		0	0	extracellular region;			0	0	0	0	0	0	0
PANCREATIC	NM_152665	TCTEX1D1	200132	Q8N7M0	Tctex1 domain-containing protein 1;TCTEX1D1	UNCHARACTERIZED (PTHR21255:SF2)	0	0	0	microtubule family cytoskeletal protein		0	0	0	0	0	0	0
PANCREATIC	NM_152765	C8orf46	254778	Q8TAG6	Uncharacterized protein C8orf46;C8orf46		0	0	0			0	0	0	0	0	0	0
PANCREATIC	NM_152778	MFSD8	256471	Q8NHS3	Major facilitator superfamily domain-containing protein 8;MFSD8	SUBFAMILY NOT NAMED (PTHR24003:SF12)	0	cell death;transmembrane transport;	integral to membrane;lysosomal membrane;membrane;	carbohydrate transporter		0	0	0	0	0	0	0
PANCREATIC	NM_153044	C22orf27	150291	Q8N0Y4	Uncharacterized protein C22orf27;C22orf27		0	0	0			0	0	0	0	0	0	0
PANCREATIC	NM_173599	C12orf40	283461	Q86WS4	Uncharacterized protein C12orf40;C12orf40		0	0	0			0	0	0	0	0	0	0
PANCREATIC	NM_173658	ZNF660	285349	Q6AZW8	Zinc finger protein 660;ZNF660	SUBFAMILY NOT NAMED (PTHR24387:SF395)	DNA binding;metal ion binding;zinc ion binding;	regulation of transcription, DNA-dependent;	intracellular;nucleus;	KRAB box transcription factor		0	0	0	0	0	0	0
PANCREATIC	NM_173805	FLJ38723	255180		uncharacterized FLJ38723		0	0	0			0	0	0	0	0	0	0
PANCREATIC	NM_174922	ADCK5	203054	Q3MIX3	Uncharacterized aarF domain-containing protein kinase 5;ADCK5	UNCHARACTERIZED AARF DOMAIN-CONTAINING PROTEIN KINASE 5 (PTHR10566:SF25)	kinase activity;protein serine/threonine kinase activity;	0	integral to membrane;membrane;	hydrolase		0	0	0	0	0	0	0
PANCREATIC	NM_178558	ZNF680	340252	Q8NEM1	Zinc finger protein 680;ZNF680	SUBFAMILY NOT NAMED (PTHR24385:SF476)	DNA binding;metal ion binding;zinc ion binding;	regulation of transcription, DNA-dependent;	intracellular;nucleolus;nucleus;	KRAB box transcription factor		0	0	0	0	0	0	0
PANCREATIC	NM_181623	KRTAP15-1	254950	Q3LI76	Keratin-associated protein 15-1;KRTAP15-1	SUBFAMILY NOT NAMED (PTHR19051:SF3)	0	0	intermediate filament;	structural protein		0	0	0	0	0	0	0
PANCREATIC	NM_181725	METTL2A	339175	Q96IZ6	Methyltransferase-like protein 2A;METTL2A	SUBFAMILY NOT NAMED (PTHR22809:SF0)	methyltransferase activity;transferase activity;	0	0	methyltransferase		0	0	0	0	0	0	0
PANCREATIC	NM_182534	C1orf126	200197	Q8TEB6	Uncharacterized protein C1orf126;C1orf126		0	0	0			0	0	0	0	0	0	0
PANCREATIC	NM_198447	GOLT1A	127845	Q6ZVE7	Vesicle transport protein GOT1A;GOLT1A	SUBFAMILY NOT NAMED (PTHR21493:SF10)	0	protein transport;vesicle-mediated transport;	Golgi apparatus;Golgi membrane;integral to membrane;membrane;			0	0	0	0	0	0	0
PANCREATIC	NM_207510	LCNL1	401562	Q6ZST4	lipocalin-like 1		binding;	0	0			0	0	0	0	0	0	0
PANCREATIC	XM_031401	MEGF6	1953	O75095	Multiple epidermal growth factor-like domains 6;MEGF6	SUBFAMILY NOT NAMED (PTHR24035:SF222)	calcium ion binding;	biological_process;	cellular_component;extracellular region;	signaling molecule		0	0	0	0	0	0	0
PANCREATIC	XM_372745	ZNF818P	390963	Q6ZRF7	Putative zinc finger protein 818;ZNF818P	ZNF-RELATED (PTHR23229:SF8)	DNA binding;metal ion binding;zinc ion binding;	regulation of transcription, DNA-dependent;	intracellular;nucleus;	KRAB box transcription factor		0	0	0	0	0	0	0
PANCREATIC	XM_373259	LOC392254	392254	#N/A	similar to glyceraldehyde-3-phosphate dehydrogenase		0	0	0			0	0	0	0	0	0	0
PANCREATIC	XM_496519	LOC440820	440820	#N/A	similar to breakpoint cluster region isoform 1		0	0	0			0	0	0	0	0	0	0
PANCREATIC	XM_498339	LOC442430	442430	#N/A	similar to peptidyl-Pro cis trans isomerase		0	0	0			0	0	0	0	0	0	0
		*Anexin 5 text mining results may reflect the use of the annexin5 as an assay rather than it's involvement in cancer
		Text mining performed using Gene Valorization NCBI version (PMID: 21349868, http://bioguide-project.net/gv) on Aug 9 2011
