# Supplementary material for: Essential Gene Profiles in Breast, Pancreatic, and Ovarian Cancer Cells
Source: Oxford University Press journal article supplement (doi:10.1158/2159-8290.cd-11-0224), 2011-12-29
Supplement: 21598290cd110224-sup-t6_xls_75kb.xls [file 21598290cd110224-sup-t6_xls_75kb.xls]

## Sheet: STable 6
Supplemental Table 6: General essential genes.
Entrez Gene Symbol	Entrez Gene ID	UniProtID	Description	Positive Cell Lines (/72)	Family/Subfamily (PANTHER)	GO_MF	GO_BP	GO_CC	Protein Class (PANTHER)	Pathway (PANTHER)	Number of Pubmed Records
											1o filter - Cancer	2o filter - Breast Cancer	2o filter - Ovarian Cancer	2o filter - Pancreatic Cancer
ALG10B	144245	Q5I7T1	Putative alpha-1,2-glucosyltransferase ALG10-B;ALG10B	43	POTASSIUM CHANNEL REGULATOR 1 (PTHR12989:SF10)	dolichyl-phosphate-glucose-glycolipid alpha-glucosyltransferase activity;transferase activity, transferring hexosyl groups;	cellular protein metabolic process;dolichol-linked oligosaccharide biosynthetic process;post-translational protein modification;protein N-linked glycosylation via asparagine;	endoplasmic reticulum membrane;integral to membrane;plasma membrane;			1	0	0	0
ANAPC4	29945	Q9UJX5	Anaphase-promoting complex subunit 4;ANAPC4	58	SUBFAMILY NOT NAMED (PTHR13260:SF0)	protein phosphatase binding;ubiquitin-protein ligase activity;	G2/M transition of mitotic cell cycle;anaphase-promoting complex-dependent proteasomal ubiquitin-dependent protein catabolic process;cell cycle checkpoint;cell division;mitosis;mitotic anaphase;mitotic cell cycle;mitotic cell cycle spindle assembly checkpoint;negative regulation of ubiquitin-protein ligase activity involved in mitotic cell cycle;positive regulation of ubiquitin-protein ligase act…	anaphase-promoting complex;cytosol;nucleoplasm;nucleus;			1	1	0	0
AQR	9716	O60306	Intron-binding protein aquarius;AQR	70	INTRON-BINDING PROTEIN AQUARIUS (PTHR10887:SF5)	RNA binding;	RNA splicing;nuclear mRNA splicing, via spliceosome;	catalytic step 2 spliceosome;nucleus;	DNA helicase		3	0	0	0
ARCN1	372	P48444	Coatomer subunit delta;ARCN1	67	COATOMER SUBUNIT DELTA (PTHR10121:SF0)		COPI coating of Golgi vesicle;cellular membrane organization;intracellular protein transport;retrograde vesicle-mediated transport, Golgi to ER;vesicle-mediated transport;	COPI vesicle coat;Golgi apparatus;Golgi membrane;clathrin adaptor complex;cytoplasm;cytoplasmic vesicle;cytosol;membrane;	vesicle coat protein		0	0	0	0
ATP6V0D1	9114	P61421	V-type proton ATPase subunit d 1;ATP6V0D1	42	SUBFAMILY NOT NAMED (PTHR11028:SF0)	hydrogen-exporting ATPase activity, phosphorylative mechanism;protein binding;protein complex binding;	ATP hydrolysis coupled proton transport;brain development;cellular iron ion homeostasis;insulin receptor signaling pathway;ion transport;proton transport;transferrin transport;transmembrane transport;	apical plasma membrane;axon terminus;early endosome;endosome membrane;membrane;proton-transporting V-type ATPase, V0 domain;synaptic vesicle;synaptosome;vacuolar proton-transporting V-type ATPase complex;	ATP synthase		0	0	0	0
AURKB	9212	Q96GD4	Serine/threonine-protein kinase 12;AURKB	50	SUBFAMILY NOT NAMED (PTHR24350:SF49)	ATP binding;metal ion binding;nucleotide binding;protein binding;protein serine/threonine kinase activity;	M phase of mitotic cell cycle;aging;anaphase-promoting complex-dependent proteasomal ubiquitin-dependent protein catabolic process;cell proliferation;cytokinesis;mitotic cell cycle;mitotic prometaphase;protein localization to kinetochore;	chromosome;chromosome passenger complex;condensed chromosome, centromeric region;condensed nuclear chromosome, centromeric region;cytoplasm;cytoskeleton;cytosol;midbody;nucleus;spindle;	protein kinase		37	3	0	2
BDKRB1	623	P46663	B1 bradykinin receptor;BDKRB1	40	SUBFAMILY NOT NAMED (PTHR24228:SF194)	G-protein coupled receptor activity;bradykinin receptor activity;peptide binding;receptor activity;	activation of protein kinase C activity by G-protein coupled receptor protein signaling pathway;elevation of cytosolic calcium ion concentration;inflammatory response;negative regulation of blood pressure;negative regulation of cell growth;negative regulation of protein phosphorylation;positive regulation of leukocyte migration;positive regulation of release of sequestered calcium ion into cytoso…	endoplasmic reticulum;integral to plasma membrane;membrane fraction;neuron projection;plasma membrane;	G-protein coupled receptor	Heterotrimeric G-protein signaling pathway-Gq alpha and Go alpha mediated pathway->Gq-protein coupled receptor;;	2	1	0	0
BMPR1A	657	P36894	Bone morphogenetic protein receptor type-1A;BMPR1A	37	SUBFAMILY NOT NAMED (PTHR23255:SF19)	ATP binding;SMAD binding;metal ion binding;nucleotide binding;protein binding;protein homodimerization activity;protein serine/threonine kinase activity;receptor activity;transforming growth factor beta receptor activity;	BMP signaling pathway;Mullerian duct regression;cartilage development;cell differentiation;developmental growth;dorsal/ventral axis specification;ectoderm development;embryonic digit morphogenesis;embryonic organ development;endocardial cushion formation;heart formation;hindlimb morphogenesis;immune response;in utero embryonic development;lateral mesoderm development;lung development;mesendoderm …	caveola;integral to membrane;plasma membrane;	protein kinase	Wnt signaling pathway->Transforming growth factor beta activated kinase 1;;TGF-beta signaling pathway->TGFbetareceptor I;;TGF-beta signaling pathway->TGFbetareceptors;;;;	159	15	6	2
BUB1B	701	O60566	Mitotic checkpoint serine/threonine-protein kinase BUB1 beta;BUB1B	42	SUBFAMILY NOT NAMED (PTHR14030:SF0)	ATP binding;nucleotide binding;protein binding;protein kinase activity;protein serine/threonine kinase activity;	M phase of mitotic cell cycle;anaphase-promoting complex-dependent proteasomal ubiquitin-dependent protein catabolic process;apoptosis;cell cycle;cell cycle checkpoint;cell division;cell proliferation;mitosis;mitotic cell cycle;mitotic cell cycle checkpoint;mitotic cell cycle spindle assembly checkpoint;mitotic metaphase/anaphase transition;mitotic prometaphase;negative regulation of ubiquitin-pr…	anaphase-promoting complex;chromosome;condensed chromosome kinetochore;condensed chromosome outer kinetochore;cytoplasm;cytoskeleton;cytosol;kinetochore;microtubule organizing center;nucleus;perinuclear region of cytoplasm;spindle midzone;	protein kinase		34	8	1	1
C12orf66	144577	Q96MD2	UPF0536 protein C12orf66;C12orf66	45							0	0	0	0
C14orf2	9556	P56378	6.8 kDa mitochondrial proteolipid;MP68	43	SUBFAMILY NOT NAMED (PTHR15233:SF0)	molecular_function;	biological_process;	cellular_component;mitochondrion;			0	0	0	0
C16orf72	29035	Q14CZ0	UPF0472 protein C16orf72;C16orf72	41							0	0	0	0
C22orf27	150291	Q8N0Y4	Uncharacterized protein C22orf27;C22orf27	56							0	0	0	0
C3orf39	84892	Q8NAT1	Uncharacterized glycosyltransferase AGO61;AGO61	43	SUBFAMILY NOT NAMED (PTHR20961:SF0)	transferase activity, transferring glycosyl groups;		extracellular region;	glycosyltransferase		0	0	0	0
C9orf30	91283	Q96H12	chromosome 9 open reading frame 30	37		identical protein binding;					1	1	0	0
CARS2	79587	Q9HA77	Probable cysteinyl-tRNA synthetase, mitochondrial;CARS2	36	CYSTEINYL-TRNA SYNTHETASE (PTHR10890:SF3)	ATP binding;cysteine-tRNA ligase activity;ligase activity;metal ion binding;nucleotide binding;	cysteinyl-tRNA aminoacylation;gene expression;tRNA aminoacylation for protein translation;	cytoplasm;cytosol;mitochondrial matrix;mitochondrion;	RNA binding protein		0	0	0	0
CCNB3	85417	Q8WWL7	G2/mitotic-specific cyclin-B3;CCNB3	62	G2/MITOTIC-SPECIFIC CYCLIN-B3 (PTHR10177:SF22)	protein kinase binding;	cell cycle;cell division;meiosis;regulation of G2/M transition of mitotic cell cycle;regulation of cyclin-dependent protein kinase activity;	nucleolus;nucleus;	kinase activator		2	0	0	0
CCT3	7203	P49368	T-complex protein 1 subunit gamma;CCT3	66	CHAPERONIN CONTAINING T-COMPLEX PROTEIN 1, GAMMA SUBUNIT, TCPG (PTHR11353:SF24)	ATP binding;nucleotide binding;protein binding;unfolded protein binding;	'de novo' posttranslational protein folding;cellular protein metabolic process;protein folding;	cytoplasm;cytoskeleton;cytosol;plasma membrane;	chaperonin		12	0	1	0
CCT6A	908	P40227	T-complex protein 1 subunit zeta;CCT6A	40	CHAPERONIN CONTAINING T-COMPLEX PROTEIN 1, ZETA SUBUNIT, TCPZ (PTHR11353:SF21)	ATP binding;nucleotide binding;unfolded protein binding;	'de novo' posttranslational protein folding;cellular protein metabolic process;protein folding;	cytoplasm;cytosol;	chaperonin		3	0	0	0
CCT7	10574	Q99832	T-complex protein 1 subunit eta;CCT7	49	CHAPERONIN CONTAINING T-COMPLEX PROTEIN 1, ETA SUBUNIT, TCPH (PTHR11353:SF22)	ATP binding;identical protein binding;nucleotide binding;unfolded protein binding;	'de novo' posttranslational protein folding;cellular protein metabolic process;protein folding;	chaperonin-containing T-complex;cytoplasm;cytosol;mitochondrion;	chaperonin		51	1	0	0
CCT8	10694	P50990	T-complex protein 1 subunit theta;CCT8	54	CHAPERONIN CONTAINING T-COMPLEX PROTEIN 1, THETA SUBUNIT, TCPQ (PTHR11353:SF19)	ATP binding;ATPase activity, coupled;nucleotide binding;unfolded protein binding;	'de novo' posttranslational protein folding;cellular protein metabolic process;protein folding;	aggresome;cytoplasm;cytosol;intermediate filament cytoskeleton;microtubule organizing center;	chaperonin		0	0	0	0
CDC40	51362	O60508	Pre-mRNA-processing factor 17;CDC40	58	SUBFAMILY NOT NAMED (PTHR19852:SF8)		RNA splicing;gene expression;mRNA 3'-end processing;mRNA export from nucleus;nuclear mRNA splicing, via spliceosome;termination of RNA polymerase II transcription;transcription from RNA polymerase II promoter;	catalytic step 2 spliceosome;nucleoplasm;nucleus;spliceosomal complex;	mRNA processing factor		3	0	0	0
CDC5L	988	Q99459	Cell division cycle 5-like protein;CDC5L	60	CELL DIVISION CYCLE 5-LIKE PROTEIN (PTHR10641:SF17)	DNA binding;RNA binding;protein binding;protein domain specific binding;	RNA splicing;cell cycle;nuclear mRNA splicing, via spliceosome;regulation of transcription, DNA-dependent;	catalytic step 2 spliceosome;cytoplasm;nuclear speck;nucleolus;nucleus;	transcription factor		10	0	0	0
CDK11B	984	P21127	cyclin-dependent kinase 11B	66		ATP binding;cyclin-dependent protein kinase activity;nucleotide binding;protein binding;protein kinase activity;protein serine/threonine kinase activity;	apoptosis;cell proliferation;mitosis;protein phosphorylation;regulation of cell growth;regulation of mRNA processing;regulation of transcription, DNA-dependent;	cytoplasm;nucleus;			0	0	0	0
CEND1	51286	Q8N111	Cell cycle exit and neuronal differentiation protein 1;CEND1	43				integral to membrane;membrane;			1	0	0	0
CENPO	79172	Q9BU64	Centromere protein O;CENPO	39	SUBFAMILY NOT NAMED (PTHR14582:SF0)	protein binding;	CenH3-containing nucleosome assembly at centromere;M phase of mitotic cell cycle;cell division;chromosome segregation;mitotic cell cycle;mitotic prometaphase;nucleosome assembly;	chromosome;condensed chromosome kinetochore;cytosol;nucleoplasm;nucleus;			3	0	0	0
CHD4	1108	Q14839	Chromodomain-helicase-DNA-binding protein 4;CHD4	58	CHROMODOMAIN-HELICASE-DNA-BINDING PROTEIN 4 (PTHR10799:SF220)	ATP binding;ATP-dependent DNA helicase activity;DNA binding;helicase activity;hydrolase activity;hydrolase activity, acting on acid anhydrides, in phosphorus-containing anhydrides;metal ion binding;nucleotide binding;protein binding;transcription factor binding;zinc ion binding;	chromatin modification;regulation of transcription from RNA polymerase II promoter;	NuRD complex;cytoplasm;cytoskeleton;microtubule organizing center;nucleus;	DNA helicase		24	2	0	0
CHEK1	1111	O14757	Serine/threonine-protein kinase Chk1;CHEK1	50	SUBFAMILY NOT NAMED (PTHR24344:SF11)	ATP binding;kinase activity;nucleotide binding;protein binding;protein kinase activity;protein serine/threonine kinase activity;	DNA damage checkpoint;DNA damage induced protein phosphorylation;DNA repair;DNA replication;G2/M transition DNA damage checkpoint;G2/M transition of mitotic cell cycle;cell cycle;cell cycle checkpoint;cellular response to caffeine;cellular response to mechanical stimulus;cellular response to organic substance;gamete generation;negative regulation of cell proliferation;phosphorylation;protein phos…	chromosome, telomeric region;condensed nuclear chromosome;cytoplasm;cytoskeleton;microtubule organizing center;nucleoplasm;nucleus;replication fork;	protein kinase		40	8	1	2
CLTC	1213	Q00610	Clathrin heavy chain 1;CLTC	54	CLATHRIN HEAVY CHAIN 1 (PTHR10292:SF7)	protein binding;structural molecule activity;	axon guidance;cellular membrane organization;epidermal growth factor receptor signaling pathway;intracellular protein transport;mitosis;negative regulation of epidermal growth factor receptor signaling pathway;nerve growth factor receptor signaling pathway;post-Golgi vesicle-mediated transport;receptor internalization;receptor-mediated endocytosis;transferrin transport;vesicle-mediated transport;	clathrin coat;clathrin coat of coated pit;clathrin coat of trans-Golgi network vesicle;clathrin-coated vesicle;cytoplasmic vesicle;cytoplasmic vesicle membrane;cytosol;melanosome;mitochondrion;plasma membrane;spindle;	vesicle coat protein	Heterotrimeric G-protein signaling pathway-Gq alpha and Go alpha mediated pathway->Clathrin;;Heterotrimeric G-protein signaling pathway-Gi alpha and Gs alpha mediated pathway->Clathrin;;;	29	0	0	0
CMTM3	123920	Q96MX0	CKLF-like MARVEL transmembrane domain-containing protein 3;CMTM3	41	CHEMOKINE-LIKE FACTOR SUPER FAMILY MEMBER 3 (PTHR22776:SF3)	cytokine activity;	chemotaxis;	extracellular space;integral to membrane;membrane;	myelin protein		2	1	0	0
COPA	1314	P53621	Proxenin;COPA	53	COATOMER ALPHA SUBUNIT (PTHR19876:SF1)	hormone activity;structural molecule activity;	COPI coating of Golgi vesicle;cellular membrane organization;intracellular protein transport;pancreatic juice secretion;retrograde vesicle-mediated transport, Golgi to ER;vesicle-mediated transport;	COPI vesicle coat;Golgi apparatus;Golgi membrane;cytoplasm;cytoplasmic vesicle;cytosol;extracellular region;extracellular space;membrane;membrane coat;microsome;soluble fraction;	vesicle coat protein		28	1	0	0
COPB1	1315	P53618	Coatomer subunit beta;COPB1	68	COATOMER SUBUNIT BETA (PTHR10635:SF0)	protein binding;structural molecule activity;	COPI coating of Golgi vesicle;cellular membrane organization;interspecies interaction between organisms;intra-Golgi vesicle-mediated transport;intracellular protein transport;retrograde vesicle-mediated transport, Golgi to ER;vesicle-mediated transport;	COPI vesicle coat;ER-Golgi intermediate compartment;Golgi apparatus;Golgi membrane;Golgi-associated vesicle;cytoplasm;cytoplasmic vesicle;cytosol;membrane coat;plasma membrane;	vesicle coat protein		0	0	0	0
COPS2	9318	P61201	COP9 signalosome complex subunit 2;COPS2	40	COP9 SIGNALOSOME COMPLEX SUBUNIT 2 (PTHR10678:SF3)	protein binding;signal transducer activity;	cullin deneddylation;signal transduction;transcription from RNA polymerase II promoter;	cytoplasm;intracellular membrane-bounded organelle;nucleolus;nucleus;signalosome;			4	0	0	0
COPZ1	22818	P61923	Coatomer subunit zeta-1;COPZ1	54	SUBFAMILY NOT NAMED (PTHR11043:SF0)		COPI coating of Golgi vesicle;cellular membrane organization;intra-Golgi vesicle-mediated transport;intracellular protein transport;retrograde vesicle-mediated transport, Golgi to ER;vesicle-mediated transport;	COPI vesicle coat;Golgi apparatus;Golgi membrane;cytoplasm;cytoplasmic vesicle;cytosol;membrane;membrane coat;	vesicle coat protein		1	0	0	0
CPSF1	29894	Q10570	Cleavage and polyadenylation specificity factor subunit 1;CPSF1	36	CLEAVAGE AND POLYADENYLATION SPECIFICITY FACTOR SUBUNIT 1 (CLEAVAGE AND POLYADENYLATION SPECIFICITY FACTOR 160 KDA SUBUNIT)(CPSF 160 KDA SUBUNIT) (PTHR10644:SF2)	RNA binding;mRNA 3'-UTR binding;protein binding;	RNA splicing;gene expression;mRNA 3'-end processing;mRNA cleavage;mRNA export from nucleus;mRNA polyadenylation;mRNA processing;nuclear mRNA splicing, via spliceosome;termination of RNA polymerase II transcription;transcription from RNA polymerase II promoter;	mRNA cleavage and polyadenylation specificity factor complex;nucleoplasm;nucleus;	damaged DNA-binding protein		1	0	0	0
CSE1L	1434	P55060	Exportin-2;CSE1L	36	IMPORTIN-ALPHA RE-EXPORTER (CHROMOSOME SEGREGATION 1-LIKE PROTEIN) (PTHR10997:SF8)	importin-alpha export receptor activity;protein binding;	apoptosis;cell proliferation;intracellular protein transport;	cytoplasm;nucleus;	transporter		30	5	1	0
CYorf15A	246126	Q9BZA5	Uncharacterized protein CYorf15A;CYorf15A	39	UNCHARACTERIZED PROTEIN CYORF15A (PTHR16127:SF14)				antibacterial response protein		0	0	0	0
DAPK1	1612	P53355	Death-associated protein kinase 1;DAPK1	36	DEATH- ASSOCIATED PROTEIN KINASE (PTHR22964:SF1)	ATP binding;calmodulin binding;nucleotide binding;protein binding;protein serine/threonine kinase activity;	anti-apoptosis;apoptosis;induction of apoptosis;induction of apoptosis by extracellular signals;intracellular protein kinase cascade;protein phosphorylation;regulation of apoptosis;signal transduction;	actin cytoskeleton;cytoplasm;	protein kinase		100	17	0	1
DDR1	780	Q08345	Epithelial discoidin domain-containing receptor 1;DDR1	49		ATP binding;nucleotide binding;protein binding;receptor activity;transmembrane receptor protein tyrosine kinase activity;	branching involved in mammary gland duct morphogenesis;cell adhesion;ear development;embryo implantation;mammary gland alveolus development;negative regulation of cell proliferation;organ regeneration;peptidyl-tyrosine phosphorylation;regulation of cell growth;regulation of cell-matrix adhesion;response to protein stimulus;skin development;transmembrane receptor protein tyrosine kinase signaling …	basolateral plasma membrane;extracellular region;integral to plasma membrane;plasma membrane;			64	16	5	2
DDR2	4921	Q16832	Discoidin domain-containing receptor 2;DDR2	36	SUBFAMILY NOT NAMED (PTHR24416:SF253)	ATP binding;collagen binding;nucleotide binding;receptor activity;transmembrane receptor protein tyrosine kinase activity;	cell adhesion;positive regulation of cell proliferation;signal transduction;transmembrane receptor protein tyrosine kinase signaling pathway;	apical plasma membrane;integral to plasma membrane;membrane;	protein kinase		23	3	1	0
DDX18	8886	Q9NVP1	ATP-dependent RNA helicase DDX18;DDX18	53	SUBFAMILY NOT NAMED (PTHR24031:SF23)	ATP binding;ATP-dependent RNA helicase activity;RNA binding;helicase activity;hydrolase activity;nucleotide binding;			RNA helicase		2	0	0	0
DDX41	51428	Q9UJV9	Probable ATP-dependent RNA helicase DDX41;DDX41	45	SUBFAMILY NOT NAMED (PTHR24031:SF46)	ATP binding;ATP-dependent helicase activity;RNA binding;helicase activity;hydrolase activity;metal ion binding;nucleotide binding;protein binding;zinc ion binding;	RNA processing;RNA splicing;apoptosis;multicellular organismal development;nuclear mRNA splicing, via spliceosome;	catalytic step 2 spliceosome;nucleolus;nucleus;	RNA helicase		3	1	0	0
DDX46	9879	Q7L014	Probable ATP-dependent RNA helicase DDX46;DDX46	44	SUBFAMILY NOT NAMED (PTHR24031:SF45)	ATP binding;ATP-dependent helicase activity;RNA binding;helicase activity;hydrolase activity;nucleotide binding;	RNA splicing;mRNA processing;	Cajal body;nuclear speck;nucleus;	RNA helicase		1	0	0	0
DDX49	54555	Q9Y6V7	Probable ATP-dependent RNA helicase DDX49;DDX49	57	SUBFAMILY NOT NAMED (PTHR24031:SF12)	ATP binding;ATP-dependent helicase activity;RNA binding;helicase activity;hydrolase activity;nucleotide binding;			RNA helicase		0	0	0	0
DHX9	1660	Q08211	ATP-dependent RNA helicase A;DHX9	36	SUBFAMILY NOT NAMED (PTHR18934:SF68)	ATP binding;ATP-dependent DNA helicase activity;ATP-dependent RNA helicase activity;DNA binding;RNA helicase activity;double-stranded RNA binding;hydrolase activity;nucleotide binding;protein binding;	CRD-mediated mRNA stabilization;RNA splicing;cellular response to heat;gene expression;nuclear mRNA splicing, via spliceosome;	CRD-mediated mRNA stability complex;centrosome;cytoplasm;intracellular;nucleolus;nucleoplasm;nucleus;ribonucleoprotein complex;	RNA helicase		25	4	1	0
DNM2	1785	P50570	Dynamin-2;DNM2	44	SUBFAMILY NOT NAMED (PTHR11566:SF23)	GTP binding;GTPase activity;enzyme binding;hydrolase activity;microtubule binding;nucleotide binding;protein binding;protein complex binding;protein kinase binding;	G2/M transition of mitotic cell cycle;GTP catabolic process;cellular membrane organization;endocytosis;positive regulation of apoptosis;positive regulation of transcription, DNA-dependent;post-Golgi vesicle-mediated transport;receptor internalization;regulation of transcription, DNA-dependent;signal transduction;synaptic vesicle transport;transferrin transport;	Golgi membrane;cell junction;clathrin-coated endocytic vesicle;cytoplasm;cytoskeleton;cytosol;microtubule;nucleus;plasma membrane;postsynaptic density;postsynaptic membrane;synapse;	hydrolase		2	0	0	0
DUSP7	1849	Q16829	Dual specificity protein phosphatase 7;DUSP7	37	DUAL SPECIFICITY PROTEIN PHOSPHATASE 7 (PTHR10159:SF118)	MAP kinase tyrosine/serine/threonine phosphatase activity;hydrolase activity;protein binding;protein tyrosine phosphatase activity;	MyD88-dependent toll-like receptor signaling pathway;MyD88-independent toll-like receptor signaling pathway;Toll signaling pathway;inactivation of MAPK activity;innate immune response;negative regulation of MAP kinase activity;nerve growth factor receptor signaling pathway;peptidyl-tyrosine dephosphorylation;stress-activated MAPK cascade;toll-like receptor 1 signaling pathway;toll-like receptor 2…	cytoplasm;cytosol;nucleoplasm;	protein phosphatase	Oxidative stress response->MAP Kinase Phosphatases;;	9	0	0	0
DYNC1H1	1778	Q14204	Cytoplasmic dynein 1 heavy chain 1;DYNC1H1	44	CYTOPLASMIC DYNEIN 1 HEAVY CHAIN 1 (PTHR10676:SF28)	ATP binding;ATPase activity, coupled;microtubule motor activity;nucleotide binding;protein binding;	G2/M transition of mitotic cell cycle;cytoplasmic mRNA processing body assembly;microtubule-based movement;mitotic cell cycle;mitotic spindle organization;stress granule assembly;transport;	Golgi apparatus;centrosome;cytoplasm;cytoplasmic dynein complex;cytoskeleton;cytosol;microtubule;	hydrolase	Huntington disease->Dynein complex;;	0	0	0	0
DYNC1I2	1781	Q13409	Cytoplasmic dynein 1 intermediate chain 2;DYNC1I2	45	DYNEIN INTERMEDIATE CHAIN DHIC 1,2 (PTHR12442:SF22)	microtubule motor activity;protein binding;protein complex binding;	G2/M transition of mitotic cell cycle;interspecies interaction between organisms;microtubule-based movement;mitotic cell cycle;transport;	centrosome;cytoplasm;cytoskeleton;cytosol;dynein complex;microtubule;	microtubule family cytoskeletal protein	Huntington disease->Dynein complex;;	0	0	0	0
DYNLRB1	83658	Q9NP97	Dynein light chain roadblock-type 1;DYNLRB1	36	DYNEIN LIGHT CHAIN ROADBLOCK-TYPE 1 (PTHR10779:SF2)	identical protein binding;microtubule motor activity;protein binding;	microtubule-based movement;transport;visual behavior;	centrosome;cytoplasm;cytoplasmic dynein complex;cytoskeleton;microtubule;	microtubule family cytoskeletal protein		5	1	2	0
ECT2	1894	Q9H8V3	Protein ECT2;ECT2	39	SUBFAMILY NOT NAMED (PTHR16777:SF0)	Rho GTPase binding;Rho guanyl-nucleotide exchange factor activity;guanyl-nucleotide exchange factor activity;protein binding;signal transducer activity;	apoptosis;cell morphogenesis;induction of apoptosis by extracellular signals;nerve growth factor receptor signaling pathway;positive regulation of I-kappaB kinase/NF-kappaB cascade;regulation of Rho protein signal transduction;regulation of small GTPase mediated signal transduction;signal transduction;small GTPase mediated signal transduction;	cytosol;	signaling molecule		57	7	2	2
EEF2	1938	P13639	Elongation factor 2;EEF2	65	EUKARYOTIC TRANSLATION ELONGATION FACTOR 2 (PTHR23115:SF4)	GTP binding;GTPase activity;nucleotide binding;protein binding;translation elongation factor activity;	cellular protein metabolic process;gene expression;translation;translational elongation;	cytoplasm;cytosol;ribonucleoprotein complex;	nucleotidyltransferase		16	2	0	1
EFTUD2	9343	Q15029	116 kDa U5 small nuclear ribonucleoprotein component;EFTUD2	59	116 KDA U5 SMALL NUCLEAR RIBONUCLEOPROTEIN COMPONENT (PTHR23115:SF5)	GTP binding;GTPase activity;nucleotide binding;protein binding;	GTP catabolic process;RNA splicing;gene expression;mRNA processing;nuclear mRNA splicing, via spliceosome;	Cajal body;catalytic step 2 spliceosome;cytoplasm;nuclear speck;nucleolus;nucleoplasm;nucleus;spliceosomal complex;	nucleotidyltransferase		0	0	0	0
EIF1AX	1964	P47813	Eukaryotic translation initiation factor 1A, X-chromosomal;EIF1AX	57	SUBFAMILY NOT NAMED (PTHR21668:SF0)	translation factor activity, nucleic acid binding;translation initiation factor activity;	cellular protein metabolic process;gene expression;translation;translational initiation;	cytoplasm;cytosol;	translation factor		1	1	0	0
EIF2S2	8894	P20042	Eukaryotic translation initiation factor 2 subunit 2;EIF2S2	53	SUBFAMILY NOT NAMED (PTHR23001:SF3)	RNA binding;metal ion binding;protein binding;translation factor activity, nucleic acid binding;translation initiation factor activity;	cellular protein metabolic process;gene expression;translation;translational initiation;	cytosol;eukaryotic translation initiation factor 2 complex;	translation factor		1	0	0	0
EIF3A	8661	Q14152	Eukaryotic translation initiation factor 3 subunit A;EIF3A	67	SUBFAMILY NOT NAMED (PTHR14005:SF0)	protein binding;structural molecule activity;translation initiation factor activity;	cellular protein metabolic process;formation of translation initiation complex;gene expression;translation;translational initiation;	cytoplasm;cytosol;eukaryotic translation initiation factor 3 complex;nucleus;	translation factor		25	5	0	1
EIF3B	8662	P55884	Eukaryotic translation initiation factor 3 subunit B;EIF3B	70	SUBFAMILY NOT NAMED (PTHR14068:SF0)	RNA binding;nucleotide binding;protein binding;protein complex scaffold;translation initiation factor activity;	cellular protein metabolic process;gene expression;regulation of translational initiation;translation;translational initiation;	cytoplasm;cytosol;eukaryotic translation initiation factor 3 complex;	translation factor		0	0	0	0
EIF3C	8663	Q99613	Eukaryotic translation initiation factor 3 subunit C;EIF3CL	66	SUBFAMILY NOT NAMED (PTHR13937:SF0)	protein binding;translation initiation factor activity;	cellular protein metabolic process;gene expression;translation;translational initiation;	cytoplasm;cytosol;eukaryotic translation initiation factor 3 complex;	translation factor		3	0	0	0
EIF3D	8664	O15371	Eukaryotic translation initiation factor 3 subunit D;EIF3D	65	SUBFAMILY NOT NAMED (PTHR12399:SF0)	protein binding;translation initiation factor activity;	cellular protein metabolic process;formation of translation initiation complex;gene expression;translation;translational initiation;	cytoplasm;cytosol;eukaryotic translation initiation factor 3 complex;	translation factor		1	0	0	0
EIF3G	8666	O75821	Eukaryotic translation initiation factor 3 subunit G;EIF3G	58	EUKARYOTIC TRANSLATION INITIATION FACTOR 3 SUBUNIT G (PTHR10352:SF0)	RNA binding;nucleotide binding;protein binding;translation initiation factor activity;	cellular protein metabolic process;gene expression;translation;translational initiation;	cytoplasm;cytosol;eukaryotic translation initiation factor 3 complex;nucleus;perinuclear region of cytoplasm;	translation factor		0	0	0	0
EIF3I	8668	Q13347	Eukaryotic translation initiation factor 3 subunit I;EIF3I	57	EUKARYOTIC TRANSLATION INITIATION FACTOR 3 SUBUNIT 2 (PTHR19877:SF1)	protein binding;translation initiation factor activity;	cellular protein metabolic process;gene expression;translation;translational initiation;	cytoplasm;cytosol;eukaryotic translation initiation factor 3 complex;	translation factor		9	3	0	0
EIF4A3	9775	P38919	Eukaryotic initiation factor 4A-III;EIF4A3	54	SUBFAMILY NOT NAMED (PTHR24031:SF143)	ATP binding;ATP-dependent RNA helicase activity;RNA binding;helicase activity;hydrolase activity;nucleotide binding;poly(A) RNA binding;protein binding;	RNA splicing;mRNA transport;negative regulation of translation;nuclear mRNA splicing, via spliceosome;nuclear-transcribed mRNA catabolic process, nonsense-mediated decay;positive regulation of translation;rRNA processing;transport;	catalytic step 2 spliceosome;cytoplasm;exon-exon junction complex;nuclear speck;nucleus;	RNA helicase		4	0	0	1
EIF4E3	317649	Q8N5X7	Eukaryotic translation initiation factor 4E type 3;EIF4E3	45	SUBFAMILY NOT NAMED (PTHR11960:SF0)	RNA binding;translation initiation factor activity;	regulation of translation;	cytoplasm;mRNA cap binding complex;	translation factor		2	0	0	0
EIF5B	9669	O60841	Eukaryotic translation initiation factor 5B;EIF5B	66	TRANSLATION INITIATION FACTOR IF-2 (PTHR23115:SF41)	GTP binding;GTPase activity;nucleotide binding;protein binding;translation initiation factor activity;	cellular protein metabolic process;gene expression;regulation of translational initiation;translation;translational initiation;	cytoplasm;cytosol;	nucleotidyltransferase		2	1	1	0
ERCC6L	54821	Q2NKX8	DNA excision repair protein ERCC-6-like;ERCC6L	53	DNA EXCISION REPAIR PROTEIN ERCC-6-LIKE (PTHR10799:SF67)	ATP binding;DNA binding;helicase activity;hydrolase activity;nucleotide binding;protein binding;	M phase of mitotic cell cycle;cell division;mitotic cell cycle;mitotic prometaphase;	chromosome;condensed chromosome kinetochore;cytosol;	DNA helicase		3	0	0	0
ERH	2079	P84090	Enhancer of rudimentary homolog;ERH	59	SUBFAMILY NOT NAMED (PTHR12373:SF0)	protein binding;	cell cycle;nucleobase, nucleoside, nucleotide and nucleic acid metabolic process;pyrimidine nucleoside metabolic process;	midbody;	transcription factor		22	3	1	0
EXOSC10	5394	Q01780	Exosome component 10;EXOSC10	53	POLYMYOSITIS/SCLERODERMA AUTOANTIGEN-RELATED (PTHR12124:SF2)	3'-5' exonuclease activity;RNA binding;exoribonuclease activity;hydrolase activity;identical protein binding;nucleotide binding;protein binding;protein serine/threonine kinase activity;	CUT catabolic process;RNA processing;cellular metabolic process;histone mRNA catabolic process;maturation of 5.8S rRNA;nuclear mRNA surveillance;nuclear polyadenylation-dependent rRNA catabolic process;nuclear retention of unspliced pre-mRNA at the site of transcription;nuclear-transcribed mRNA catabolic process;nuclear-transcribed mRNA catabolic process, nonsense-mediated decay;nucleobase, nucle…	cytoplasm;intracellular;nuclear exosome (RNase complex);nucleolus;nucleus;transcriptionally active chromatin;	exoribonuclease		3	0	0	0
FAM126A	84668	Q9BYI3	Hyccin;FAM126A	54		signal transducer activity;	biological_process;signal transduction;	cellular_component;cytoplasm;membrane;			1	0	0	0
FAM164C	79696	Q53FD0	UPF0418 protein FAM164C;FAM164C	43							0	0	0	0
FNDC7	163479	Q5VTL7	Fibronectin type III domain-containing protein 7;FNDC7	47	UNCHARACTERIZED (PTHR19143:SF1)			extracellular region;	signaling molecule		0	0	0	0
FTSJ3	117246	Q8IY81	Putative rRNA methyltransferase 3;FTSJ3	60	RRNA METHYLTRANSFERASE 3 (PTHR10920:SF13)	methyltransferase activity;nucleic acid binding;transferase activity;	RNA methylation;rRNA processing;	nucleolus;nucleus;	RNA methyltransferase		0	0	0	0
FUT9	10690	Q9Y231	Alpha-(1,3)-fucosyltransferase;FUT9	42	ALPHA-(1,3)FUCOSYLTRANSFERASE 9 (PTHR11929:SF10)	alpha(1,3)-fucosyltransferase activity;fucosyltransferase activity;transferase activity, transferring glycosyl groups;	L-fucose catabolic process;carbohydrate metabolic process;nervous system development;protein glycosylation;	Golgi apparatus;Golgi cisterna membrane;integral to membrane;membrane;	glycosyltransferase		2	0	1	0
GLIPR1L2	144321	Q4G1C9	GLIPR1-like protein 2;GLIPR1L2	38	GLIPR1-LIKE PROTEIN 2 (PTHR10334:SF66)			integral to membrane;membrane;	defense/immunity protein		1	0	0	0
GPC6	10082	Q9Y625	Secreted glypican-6;GPC6	42	GLYPICAN-6 (PTHR10822:SF15)	heparan sulfate proteoglycan binding;		anchored to membrane;extracellular region;extracellular space;integral to plasma membrane;plasma membrane;proteinaceous extracellular matrix;	extracellular matrix glycoprotein		8	1	1	1
GPR112	139378	Q8IZF6	Probable G-protein coupled receptor 112;GPR112	46	G PROTEIN-COUPLED RECEPTOR 112 (PTHR12011:SF49)	G-protein coupled receptor activity;	G-protein coupled receptor protein signaling pathway;neuropeptide signaling pathway;	integral to membrane;plasma membrane;	G-protein coupled receptor		1	0	0	0
GREM1	26585	O60565	Gremlin-1;GREM1	43	SUBFAMILY NOT NAMED (PTHR15273:SF0)	cytokine activity;protein binding;	angiogenesis;apoptosis;branching involved in ureteric bud morphogenesis;cell-cell signaling;embryonic limb morphogenesis;multicellular organismal development;negative regulation of BMP signaling pathway;negative regulation of cell growth;negative regulation of leukocyte chemotaxis;nervous system development;organ morphogenesis;positive regulation of NF-kappaB import into nucleus;positive regulati…	cell surface;extracellular region;extracellular space;		Wnt signaling pathway->Cerberus;;	31	4	1	2
GRIN2C	2905	Q14957	Glutamate [NMDA] receptor subunit epsilon-3;GRIN2C	38	SUBFAMILY NOT NAMED (PTHR18966:SF46)	N-methyl-D-aspartate selective glutamate receptor activity;cation channel activity;extracellular-glutamate-gated ion channel activity;receptor activity;transporter activity;	directional locomotion;glutamate signaling pathway;ion transport;negative regulation of protein catabolic process;neuromuscular process controlling balance;protein localization;regulation of excitatory postsynaptic membrane potential;regulation of membrane potential;response to wounding;synaptic transmission;transport;	N-methyl-D-aspartate selective glutamate receptor complex;cell junction;integral to plasma membrane;outer membrane-bounded periplasmic space;plasma membrane;postsynaptic density;postsynaptic membrane;synapse;	ligand-gated ion channel	Metabotropic glutamate receptor group I pathway->N-methyl-D-aspartate Receptor;;Huntington disease->N-methyl-d-aspartate receptor;;Muscarinic acetylcholine receptor 1 and 3 signaling pathway->N-methyl-D-aspartate Receptor;;Ionotropic glutamate receptor pathway->N-methyl D-aspartate receptor subtype 2C;;Ionotropic glutamate receptor pathway->N-methyl-D-aspartate Receptor;;Metabotropic glutamate re…	0	0	0	0
GTF3C4	9329	Q9UKN8	General transcription factor 3C polypeptide 4;GTF3C4	39	SUBFAMILY NOT NAMED (PTHR15496:SF0)	DNA binding;acyltransferase activity;enzyme activator activity;histone acetyltransferase activity;protein binding;transferase activity;	5S class rRNA transcription from RNA polymerase III type 1 promoter;histone acetylation;positive regulation of catalytic activity;tRNA transcription from RNA polymerase III promoter;transcription from RNA polymerase III promoter;transcription initiation from RNA polymerase III promoter;transcription, DNA-dependent;	nucleoplasm;nucleus;transcription factor TFIIIC complex;			0	0	0	0
HLA-DRB3	3125	P01913	HLA class II histocompatibility antigen, DRB3-2 beta chain;HLA-DRB3	37	MHC CLASS II BETA CHAIN (PTHR19944:SF26)	MHC class II receptor activity;	T cell costimulation;T cell receptor signaling pathway;antigen processing and presentation of peptide or polysaccharide antigen via MHC class II;cytokine-mediated signaling pathway;immune response;interferon-gamma-mediated signaling pathway;signal transduction;	Golgi apparatus;MHC class II protein complex;endoplasmic reticulum;endoplasmic reticulum membrane;endosome;integral to membrane;integral to plasma membrane;late endosome membrane;lysosomal membrane;membrane;plasma membrane;	major histocompatibility complex antigen		30	1	0	0
HNRNPC	3183	P07910	Heterogeneous nuclear ribonucleoproteins C1/C2;HNRNPC	70	HETEROGENEOUS NUCLEAR RIBONUCLEOPROTEIN C (C1/C2) (PTHR13968:SF3)	RNA binding;identical protein binding;nucleotide binding;protein binding;	RNA splicing;gene expression;nuclear mRNA splicing, via spliceosome;	catalytic step 2 spliceosome;nucleoplasm;nucleus;spliceosomal complex;	mRNA processing factor		7	1	0	0
HNRNPM	4670	P52272	Heterogeneous nuclear ribonucleoprotein M;HNRNPM	44	HETEROGENEOUS NUCLEAR RIBONUCLEOPROTEIN M (HNRNP M) (PTHR23003:SF6)	RNA binding;nucleotide binding;protein binding;protein domain specific binding;	RNA splicing;alternative nuclear mRNA splicing, via spliceosome;gene expression;nuclear mRNA splicing, via spliceosome;	catalytic step 2 spliceosome;integral to plasma membrane;nuclear matrix;nucleolus;nucleoplasm;nucleus;paraspeckles;spliceosomal complex;	ribonucleoprotein		4	0	0	1
HNRNPU	3192	Q00839	Heterogeneous nuclear ribonucleoprotein U;HNRNPU	44	HETEROGENEOUS NUCLEAR RIBONUCLEOPROTEIN U (PTHR12381:SF11)	ATP binding;DNA binding;RNA binding;nucleotide binding;protein binding;	CRD-mediated mRNA stabilization;RNA processing;RNA splicing;gene expression;nuclear mRNA splicing, via spliceosome;	CRD-mediated mRNA stability complex;catalytic step 2 spliceosome;cell surface;cytoplasm;heterogeneous nuclear ribonucleoprotein complex;nucleoplasm;nucleus;ribonucleoprotein complex;	RNA binding protein		2	0	0	0
HSPA9	3313	P38646	Stress-70 protein, mitochondrial;HSPA9	50	HEAT SHOCK PROTEIN 70 (HSP70) (PTHR19375:SF1)	ATP binding;enzyme binding;nucleotide binding;protein binding;unfolded protein binding;	anti-apoptosis;protein export from nucleus;protein folding;	cell surface;cytoplasm;mitochondrial nucleoid;mitochondrion;	Hsp70 family chaperone	Apoptosis signaling pathway->Heat shock protein 70;;Parkinson disease->Heat shock protein 70;;;	28	2	0	0
HSPG2	3339	P98160	Basement membrane-specific heparan sulfate proteoglycan core protein;HSPG2	52		protein C-terminus binding;protein binding;	angiogenesis;cell adhesion;lipid metabolic process;lipoprotein metabolic process;	basement membrane;extracellular matrix;extracellular region;extracellular space;plasma membrane;			7	1	0	2
ICK	22858	Q9UPZ9	Serine/threonine-protein kinase ICK;ICK	46	SUBFAMILY NOT NAMED (PTHR24055:SF115)	ATP binding;cyclin-dependent protein kinase activity;magnesium ion binding;nucleotide binding;protein serine/threonine kinase activity;	intracellular protein kinase cascade;multicellular organismal development;protein phosphorylation;signal transduction;	cytoplasm;cytosol;intracellular membrane-bounded organelle;nucleus;	protein kinase		18	4	0	0
IGFBP2	3485	P18065	Insulin-like growth factor-binding protein 2;IGFBP2	37	INSULIN-LIKE GROWTH FACTOR BINDING PROTEIN 2 (PTHR11551:SF5)	insulin-like growth factor I binding;insulin-like growth factor II binding;protein binding;	aging;cellular response to hormone stimulus;female pregnancy;positive regulation of activated T cell proliferation;regulation of cell growth;regulation of insulin-like growth factor receptor signaling pathway;response to drug;response to estradiol stimulus;response to glucocorticoid stimulus;response to lithium ion;response to mechanical stimulus;response to nutrient;response to retinoic acid;res…	apical plasma membrane;cytoplasmic vesicle;extracellular region;extracellular space;			369	54	27	9
INSR	3643	P06213	Insulin receptor subunit beta;INSR	39	SUBFAMILY NOT NAMED (PTHR24416:SF176)	3-phosphoinositide-dependent protein kinase binding;ATP binding;GTP binding;PTB domain binding;SH2 domain binding;insulin binding;insulin receptor activity;insulin receptor substrate binding;insulin-like growth factor I binding;insulin-like growth factor II binding;insulin-like growth factor receptor binding;lipoic acid binding;metal ion binding;nucleotide binding;phosphatidylinositol 3-kinase bi…	G-protein coupled receptor protein signaling pathway;activation of MAPK activity;activation of protein kinase B activity;activation of protein kinase activity;carbohydrate metabolic process;cellular response to growth factor stimulus;cellular response to insulin stimulus;exocrine pancreas development;fat cell differentiation;fibroblast growth factor receptor signaling pathway;glucose homeostasis;…	caveola;cytosol;endosome;endosome membrane;insulin receptor complex;integral to plasma membrane;membrane;microsome;nucleus;plasma membrane;soluble fraction;synapse;	protein kinase	Insulin/IGF pathway-protein kinase B signaling cascade->Insulin receptor/Insulin like growth factor receptor/insulin related receptor;;Insulin/IGF pathway-mitogen activated protein kinase kinase/MAP kinase cascade->Insulin/Insulin like growth factor;;Insulin/IGF pathway-mitogen activated protein kinase kinase/MAP kinase cascade->Insulin receptor/Insulin like growth factor receptor/insulin related…	72	11	6	3
INTS4L1	285905		integrator complex subunit 4-like 1	36		binding;					0	0	0	0
INTS9	55756	Q9NV88	Integrator complex subunit 9;INTS9	42	UNCHARACTERIZED (PTHR11203:SF2)	protein binding;	snRNA processing;	integrator complex;nucleus;	endoribonuclease		0	0	0	0
IRS4	8471	O14654	Insulin receptor substrate 4;IRS4	43	INSULIN RECEPTOR SUBSTRATE-4 (PTHR10614:SF2)	SH3/SH2 adaptor activity;insulin receptor binding;signal transducer activity;	signal transduction;	plasma membrane;		Insulin/IGF pathway-protein kinase B signaling cascade->Insulin receptor substrate family;;Insulin/IGF pathway-mitogen activated protein kinase kinase/MAP kinase cascade->Insulin receptor substrate family;;;	10	2	1	2
ISG20	3669	Q96AZ6	Interferon-stimulated gene 20 kDa protein;ISG20	42	INTERFERON-STIMULATED GENE 20 KDA PROTEIN (PROMYELOCYTIC LEUKEMIA NUCLEAR BODY-ASSOCIATED PROTEIN ISG20) (PTHR12801:SF7)	3'-5'-exoribonuclease activity;RNA binding;exonuclease activity;exoribonuclease II activity;hydrolase activity;metal ion binding;single-stranded DNA specific 3'-5' exodeoxyribonuclease activity;	DNA catabolic process, exonucleolytic;RNA catabolic process;cell proliferation;cytokine-mediated signaling pathway;response to virus;type I interferon-mediated signaling pathway;	PML body;intracellular;nucleoplasm;nucleus;	exoribonuclease		9	1	0	0
ITGA2	3673	P17301	Integrin alpha-2;ITGA2	52	INTEGRIN ALPHA-2 (PTHR23220:SF23)	collagen binding;identical protein binding;protein binding;receptor activity;	axon guidance;blood coagulation;cell adhesion;cell-matrix adhesion;integrin-mediated signaling pathway;interspecies interaction between organisms;organ morphogenesis;	cell surface;external side of plasma membrane;integral to membrane;integrin complex;plasma membrane;	cell adhesion molecule	Integrin signalling pathway->Integrin alpha;;Inflammation mediated by chemokine and cytokine signaling pathway->ExtraCellular matrix protein;;;	11	3	0	0
KARS	3735	Q15046	Lysyl-tRNA synthetase;KARS	68	LYSYL-TRNA SYNTHETASE (PTHR22594:SF4)	ATP binding;ligase activity;lysine-tRNA ligase activity;metal ion binding;nucleic acid binding;nucleotide binding;tRNA binding;	gene expression;interspecies interaction between organisms;lysyl-tRNA aminoacylation;tRNA aminoacylation for protein translation;tRNA processing;	cytoplasm;cytosol;extracellular region;mitochondrial matrix;mitochondrion;nucleus;plasma membrane;soluble fraction;	RNA binding protein		129	22	1	0
KCNC3	3748	Q14003	Potassium voltage-gated channel subfamily C member 3;KCNC3	36	VOLTAGE-GATED POTASSIUM CHANNEL SUBUNIT KV3.3 (PTHR11537:SF49)	voltage-gated ion channel activity;voltage-gated potassium channel activity;	cell death;ion transport;potassium ion transport;regulation of neurotransmitter secretion;transmembrane transport;	axolemma;axon terminus;dendrite membrane;integral to membrane;membrane;neuromuscular junction;neuronal cell body membrane;voltage-gated potassium channel complex;	potassium channel		0	0	0	0
KLHL14	57565	Q9P2G3	Kelch-like protein 14;KLHL14	39	SUBFAMILY NOT NAMED (PTHR24412:SF111)			cytoplasm;cytosol;endoplasmic reticulum;endoplasmic reticulum membrane;membrane;	transcription cofactor		0	0	0	0
KPNB1	3837	Q14974	Importin subunit beta-1;KPNB1	71	IMPORTIN SUBUNIT BETA-1 (KARYOPHERIN SUBUNIT BETA-1) (PTHR10527:SF1)	nuclear localization sequence binding;protein binding;protein domain specific binding;protein transporter activity;zinc ion binding;	DNA fragmentation involved in apoptotic nuclear change;NLS-bearing substrate import into nucleus;apoptosis;cellular component disassembly involved in apoptosis;interspecies interaction between organisms;protein import into nucleus;protein import into nucleus, translocation;ribosomal protein import into nucleus;viral genome transport in host cell;viral infectious cycle;viral reproduction;	cytoplasm;cytosol;nuclear pore;nucleoplasm;nucleus;	transporter		6	1	0	0
LCN10	414332	Q6JVE6	Epididymal-specific lipocalin-10;LCN10	42	LIPOCALIN 10 (PTHR11430:SF9)	binding;	transport;	extracellular region;	transfer/carrier protein		0	0	0	0
LDHC	3948	P07864	L-lactate dehydrogenase C chain;LDHC	36	L-LACTATE DEHYDROGENASE (PTHR11540:SF3)	L-lactate dehydrogenase activity;binding;oxidoreductase activity;	cellular carbohydrate metabolic process;glycolysis;	cytoplasm;	dehydrogenase		7	1	1	0
LOC392254	392254		similar to glyceraldehyde-3-phosphate dehydrogenase	52
LOC401361	401361		similar to hypothetical protein MGC16733 similar to CG12113	57
LOC402530	402530		similar to RIKEN cDNA 2610034N24	36
LOC402677	402677		similar to ribosomal protein S3a	43
LSM3	27258	P62310	U6 snRNA-associated Sm-like protein LSm3;LSM3	49	SUBFAMILY NOT NAMED (PTHR13110:SF0)	RNA binding;protein binding;	RNA metabolic process;RNA splicing;exonucleolytic nuclear-transcribed mRNA catabolic process involved in deadenylation-dependent decay;mRNA metabolic process;mRNA processing;nuclear mRNA splicing, via spliceosome;nuclear-transcribed mRNA catabolic process, deadenylation-dependent decay;	catalytic step 2 spliceosome;cytosol;nucleus;	mRNA processing factor		2	0	0	0
LSM4	25804	Q9Y4Z0	U6 snRNA-associated Sm-like protein LSm4;LSM4	38	U6 SNRNA-ASSOCIATED SM-LIKE PROTEIN LSM4 (PTHR23338:SF16)	RNA binding;protein binding;	RNA metabolic process;RNA splicing;exonucleolytic nuclear-transcribed mRNA catabolic process involved in deadenylation-dependent decay;mRNA metabolic process;mRNA processing;nuclear-transcribed mRNA catabolic process, deadenylation-dependent decay;	U6 snRNP;cytosol;nucleus;small nuclear ribonucleoprotein complex;	mRNA processing factor		3	0	0	0
LSM5	23658	Q9Y4Y9	U6 snRNA-associated Sm-like protein LSm5;LSM5	59	SUBFAMILY NOT NAMED (PTHR20971:SF0)	RNA binding;protein binding;	RNA metabolic process;RNA splicing;exonucleolytic nuclear-transcribed mRNA catabolic process involved in deadenylation-dependent decay;mRNA metabolic process;mRNA processing;nuclear-transcribed mRNA catabolic process, deadenylation-dependent decay;	cytosol;nucleus;ribonucleoprotein complex;	mRNA processing factor		0	0	0	0
LSM6	11157	P62312	U6 snRNA-associated Sm-like protein LSm6;LSM6	51	SUBFAMILY NOT NAMED (PTHR11021:SF0)	RNA binding;protein binding;	RNA metabolic process;RNA splicing;exonucleolytic nuclear-transcribed mRNA catabolic process involved in deadenylation-dependent decay;mRNA metabolic process;mRNA processing;nuclear-transcribed mRNA catabolic process, deadenylation-dependent decay;rRNA processing;tRNA processing;	cytoplasm;cytosol;nucleus;small nuclear ribonucleoprotein complex;	mRNA processing factor		0	0	0	0
LY96	23643	Q9Y6Y9	Lymphocyte antigen 96;LY96	41	SUBFAMILY NOT NAMED (PTHR15218:SF0)	coreceptor activity;lipopolysaccharide receptor activity;protein binding;	I-kappaB kinase/NF-kappaB cascade;MyD88-dependent toll-like receptor signaling pathway;MyD88-independent toll-like receptor signaling pathway;Toll signaling pathway;cell surface receptor linked signaling pathway;cellular defense response;detection of lipopolysaccharide;inflammatory response;innate immune response;lipopolysaccharide-mediated signaling pathway;response to lipopolysaccharide;toll-li…	extracellular region;extracellular space;lipopolysaccharide receptor complex;plasma membrane;	transmembrane receptor regulatory/adaptor protein	Toll receptor signaling pathway->MD-2;;	30	1	0	0
MCM2	4171	P49736	DNA replication licensing factor MCM2;MCM2	44	DNA REPLICATION LICENSING FACTOR MCM2 (PTHR11630:SF44)	ATP binding;DNA binding;DNA replication origin binding;helicase activity;histone binding;hydrolase activity;metal ion binding;nucleotide binding;protein binding;	DNA replication;DNA strand elongation involved in DNA replication;DNA unwinding involved in replication;DNA-dependent DNA replication initiation;G1/S transition of mitotic cell cycle;M/G1 transition of mitotic cell cycle;S phase of mitotic cell cycle;cell cycle;cell cycle checkpoint;mitotic cell cycle;nucleosome assembly;	MCM complex;chromatin;nuclear origin of replication recognition complex;nucleoplasm;nucleus;	DNA helicase		276	24	6	3
MDN1	23195	Q9NU22	Midasin;MDN1	47	MIDASIN (MIDAS-CONTAINING PROTEIN) (PTHR22908:SF14)	ATP binding;ATPase activity;nucleotide binding;unfolded protein binding;	ATP catabolic process;protein complex assembly;regulation of protein complex assembly;	nucleus;	chaperone		0	0	0	0
MED30	90390	Q96HR3	Mediator of RNA polymerase II transcription subunit 30;MED30	43		RNA polymerase II transcription cofactor activity;identical protein binding;ligand-dependent nuclear receptor transcription coactivator activity;receptor activity;thyroid hormone receptor binding;transcription cofactor activity;vitamin D receptor binding;	androgen receptor signaling pathway;gene expression;positive regulation of transcription, DNA-dependent;steroid hormone receptor signaling pathway;transcription initiation from RNA polymerase II promoter;	mediator complex;nucleoplasm;nucleus;			0	0	0	0
MPL	4352	P40238	Thrombopoietin receptor;MPL	42	THROMBOPOIETIN RECEPTOR (PTHR23037:SF9)	cytokine receptor activity;transmembrane receptor activity;	blood coagulation;cell proliferation;cell surface receptor linked signaling pathway;platelet activation;	integral to plasma membrane;plasma membrane;	type I cytokine receptor		374	5	0	1
MS4A13	503497	Q96JA4	Membrane-spanning 4-domains subfamily A member 14;MS4A14	52	GB DEF: HYPOTHETICAL PROTEIN (PTHR23320:SF2)			integral to membrane;membrane;	receptor		0	0	0	0
MYO3B	140469	Q8WXR4	Myosin-IIIB;MYO3B	53	SUBFAMILY NOT NAMED (PTHR13140:SF181)	ATP binding;actin binding;motor activity;nucleotide binding;protein serine/threonine kinase activity;	response to stimulus;visual perception;	cytoplasm;cytoskeleton;myosin complex;	G-protein modulator	Inflammation mediated by chemokine and cytokine signaling pathway->Myosin;;Nicotinic acetylcholine receptor signaling pathway->Myosin;;Cytoskeletal regulation by Rho GTPase->Myosin light chain;;;;	0	0	0	0
NACA	4666	Q13765	Nascent polypeptide-associated complex subunit alpha;NACA	40	SUBFAMILY NOT NAMED (PTHR21713:SF0)	DNA binding;	interspecies interaction between organisms;protein transport;transcription, DNA-dependent;translation;	cytoplasm;nascent polypeptide-associated complex;nucleus;	basic helix-loop-helix transcription factor		12	1	0	1
NACAP1	83955	Q9BZK3	Putative nascent polypeptide-associated complex subunit alpha-like protein;NACAP1	42	SUBFAMILY NOT NAMED (PTHR21713:SF0)	protein binding;			basic helix-loop-helix transcription factor		0	0	0	0
NAPA	8775	P54920	Alpha-soluble NSF attachment protein;NAPA	46	ALPHA-SOLUBLE NSF ATTACHMENT PROTEIN (SNAP-ALPHA) (PTHR13768:SF8)	protein binding;syntaxin binding;	apical protein localization;brain development;cellular membrane fusion;cellular membrane organization;intra-Golgi vesicle-mediated transport;intracellular protein transport;neuron differentiation;post-Golgi vesicle-mediated transport;vesicle-mediated transport;	cytosol;membrane;synaptobrevin 2-SNAP-25-syntaxin-1a complex;	membrane traffic protein		50	16	3	0
NCBP1	4686	Q09161	Nuclear cap-binding protein subunit 1;NCBP1	37	NUCLEAR CAP-BINDING PROTEIN SUBUNIT 1 (PTHR12412:SF8)	RNA binding;RNA cap binding;protein binding;	RNA metabolic process;RNA splicing;gene expression;gene silencing by RNA;histone mRNA metabolic process;mRNA 3'-end processing;mRNA capping;mRNA cleavage;mRNA export from nucleus;mRNA processing;ncRNA metabolic process;nuclear mRNA splicing, via spliceosome;nuclear-transcribed mRNA catabolic process, nonsense-mediated decay;positive regulation of mRNA 3'-end processing;positive regulation of vira…	cytoplasm;cytosol;mRNA cap binding complex;nucleoplasm;nucleus;ribonucleoprotein complex;	mRNA processing factor		1	0	0	0
NCOR2	9612	Q9Y618	Nuclear receptor corepressor 2;NCOR2	37	NUCLEAR RECEPTOR CO-REPRESSOR 2 (NCOR2) (PTHR13992:SF2)	DNA binding;Notch binding;histone deacetylase binding;protein N-terminus binding;protein binding;transcription corepressor activity;	cellular lipid metabolic process;negative regulation of transcription from RNA polymerase II promoter;regulation of cellular ketone metabolic process by negative regulation of transcription from an RNA polymerase II promoter;regulation of transcription, DNA-dependent;	nuclear body;nucleolus;nucleoplasm;nucleus;transcriptional repressor complex;	transcription cofactor	Notch signaling pathway->Co-repressors;;Huntington disease->Nuclear receptor co-repressor;;;	115	38	5	0
NEDD8	4738	Q15843	NEDD8;NEDD8	61	UBIQUITIN 1, 2 (PTHR10666:SF11)	protein binding;ubiquitin protein ligase binding;	anatomical structure morphogenesis;protein localization;protein modification process;protein neddylation;proteolysis;regulation of transcription from RNA polymerase II promoter;response to organic cyclic compound;ubiquitin-dependent protein catabolic process;	nucleus;	ribosomal protein		85	4	1	1
NHP2L1	4809	P55769	NHP2-like protein 1;NHP2L1	55	RIBOSOMAL PROTEIN L7AE (PTHR23105:SF11)	RNA binding;protein binding;snoRNA binding;	RNA splicing;gene expression;nuclear mRNA splicing, via spliceosome;ribosome biogenesis;	box C/D snoRNP complex;nucleolus;nucleoplasm;nucleus;spliceosomal complex;	ribosomal protein		2	0	0	0
NLN	57486	Q9BYT8	Neurolysin, mitochondrial;NLN	36	NEUROLYSIN (PTHR11804:SF13)	metal ion binding;metalloendopeptidase activity;peptidase activity;	proteolysis;	cytoplasm;mitochondrial intermembrane space;mitochondrion;	metalloprotease		14	3	0	0
NR1D1	9572	P20393	Nuclear receptor subfamily 1 group D member 1;NR1D1	41	SUBFAMILY NOT NAMED (PTHR24082:SF243)	ligand-dependent nuclear receptor activity;metal ion binding;sequence-specific DNA binding;sequence-specific DNA binding transcription factor activity;steroid hormone receptor activity;transcription corepressor activity;transcription regulatory region DNA binding;zinc ion binding;	cellular response to lipopolysaccharide;circadian rhythm;gene expression;intracellular receptor mediated signaling pathway;negative regulation of receptor biosynthetic process;negative regulation of toll-like receptor 4 signaling pathway;negative regulation of transcription from RNA polymerase II promoter;positive regulation of cholesterol homeostasis;regulation of transcription from RNA polymera…	nuclear chromatin;nucleoplasm;nucleus;	nuclear hormone receptor		18	6	1	1
NUDT21	11051	O43809	Cleavage and polyadenylation specificity factor subunit 5;NUDT21	61	SUBFAMILY NOT NAMED (PTHR13047:SF0)	AU-rich element binding;RNA binding;histone deacetylase binding;hydrolase activity;mRNA binding;protein binding;protein homodimerization activity;	RNA splicing;gene expression;mRNA 3'-end processing;mRNA polyadenylation;mRNA processing;nuclear mRNA splicing, via spliceosome;protein tetramerization;termination of RNA polymerase II transcription;transcription from RNA polymerase II promoter;	centrosome;mRNA cleavage factor complex;nucleoplasm;nucleus;paraspeckles;	mRNA processing factor		0	0	0	0
NUDT4	11163	Q9NZJ9	Diphosphoinositol polyphosphate phosphohydrolase 2;NUDT4	37	SUBFAMILY NOT NAMED (PTHR12629:SF0)	diphosphoinositol-polyphosphate diphosphatase activity;hydrolase activity;metal ion binding;	calcium-mediated signaling;cyclic nucleotide metabolic process;cyclic-nucleotide-mediated signaling;intracellular signal transduction;intracellular transport;regulation of RNA export from nucleus;	cytoplasm;intracellular;	phosphatase		0	0	0	0
NUF2	83540	Q9BZD4	Kinetochore protein Nuf2;NUF2	64	KINETOCHORE PROTEIN NUF2 (PTHR21650:SF2)	molecular_function;protein binding;	M phase of mitotic cell cycle;cell division;chromosome segregation;mitotic cell cycle;mitotic prometaphase;	Ndc80 complex;chromosome;chromosome, centromeric region;condensed chromosome kinetochore;cytosol;nucleus;	structural protein		15	0	1	0
NUP133	55746	Q8WUM0	Nuclear pore complex protein Nup133;NUP133	43	SUBFAMILY NOT NAMED (PTHR13405:SF8)	nucleocytoplasmic transporter activity;protein binding;	M phase of mitotic cell cycle;carbohydrate metabolic process;glucose transport;hexose transport;mRNA export from nucleus;mitotic cell cycle;mitotic prometaphase;nuclear pore organization;paraxial mesoderm development;protein transport;regulation of glucose transport;transmembrane transport;viral reproduction;	Nup107-160 complex;chromosome;condensed chromosome kinetochore;condensed chromosome outer kinetochore;cytosol;nuclear envelope;nuclear pore;nucleus;			1	1	0	0
NUP205	23165	Q92621	Nuclear pore complex protein Nup205;NUP205	59		protein binding;	carbohydrate metabolic process;glucose transport;hexose transport;mRNA transport;nucleocytoplasmic transport;protein import into nucleus, docking;protein transport;regulation of glucose transport;transmembrane transport;viral reproduction;	nuclear envelope;nuclear pore;nucleus;			1	0	0	0
NUP88	4927	Q99567	Nuclear pore complex protein Nup88;NUP88	37	SUBFAMILY NOT NAMED (PTHR13257:SF0)	transporter activity;	carbohydrate metabolic process;glucose transport;hexose transport;mRNA transport;protein transport;regulation of glucose transport;transmembrane transport;viral reproduction;	cytosol;nuclear pore;nucleolus;nucleus;	transporter		25	6	3	0
NUP93	9688	Q8N1F7	Nuclear pore complex protein Nup93;NUP93	56	SUBFAMILY NOT NAMED (PTHR11225:SF4)	protein binding;	carbohydrate metabolic process;glucose transport;hexose transport;mRNA transport;protein transport;regulation of glucose transport;transmembrane transport;viral reproduction;	nuclear envelope;nuclear pore;nucleus;	transporter		1	0	0	0
NUP98	4928	P52948	Nuclear pore complex protein Nup96;NUP98	36	SUBFAMILY NOT NAMED (PTHR23198:SF0)	protein binding;structural constituent of nuclear pore;transporter activity;	DNA replication;M phase of mitotic cell cycle;carbohydrate metabolic process;glucose transport;hexose transport;interspecies interaction between organisms;mRNA transport;mitotic cell cycle;mitotic prometaphase;nuclear pore organization;nucleocytoplasmic transport;protein import into nucleus, docking;protein transport;regulation of glucose transport;transmembrane transport;viral reproduction;	Nup107-160 complex;cytosol;kinetochore;membrane;nuclear envelope;nuclear membrane;nuclear pore;nucleoplasm;nucleus;	transporter		177	1	1	1
NUS1	116150	Q96E22	Nogo-B receptor;NUS1	40	SUBFAMILY NOT NAMED (PTHR21528:SF0)	molecular_function;receptor activity;transferase activity, transferring alkyl or aryl (other than methyl) groups;	angiogenesis;biological_process;cell differentiation;multicellular organismal development;	cellular_component;integral to membrane;membrane;			0	0	0	0
NXF1	10482	Q9UBU9	Nuclear RNA export factor 1;NXF1	50	NUCLEAR RNA EXPORT FACTOR 1 (PTHR10662:SF18)	mRNA binding;nucleocytoplasmic transporter activity;nucleotide binding;protein binding;	gene expression;interspecies interaction between organisms;mRNA export from nucleus;poly(A)+ mRNA export from nucleus;transport;	cytoplasm;cytosol;intracellular;nuclear inclusion body;nuclear pore;nuclear speck;nucleoplasm;nucleus;	RNA binding protein		24	0	0	0
OR51E1	143503	Q8TCB6	Olfactory receptor 51E1;OR51E1	37		olfactory receptor activity;receptor activity;	response to stimulus;sensory perception of smell;	integral to membrane;plasma membrane;			5	0	0	0
PABPN1	8106	Q86U42	Polyadenylate-binding protein 2;PABPN1	65	SUBFAMILY NOT NAMED (PTHR23365:SF0)	RNA binding;nucleotide binding;protein binding;	RNA processing;RNA splicing;gene expression;mRNA 3'-end processing;mRNA processing;modification by virus of host mRNA processing;modulation by virus of host cellular process;muscle contraction;nuclear mRNA splicing, via spliceosome;poly(A)+ mRNA export from nucleus;termination of RNA polymerase II transcription;transcription from RNA polymerase II promoter;viral infectious cycle;virus-host intera…	cytoplasm;nucleolus;nucleoplasm;nucleus;ribonucleoprotein complex;	RNA binding protein		3	0	0	0
PAPOLA	10914	P51003	Poly(A) polymerase alpha;PAPOLA	52	POLY(A) POLYMERASE ALPHA (PTHR10682:SF9)	ATP binding;RNA binding;magnesium ion binding;manganese ion binding;nucleotide binding;nucleotidyltransferase activity;polynucleotide adenylyltransferase activity;transferase activity;	RNA polyadenylation;RNA splicing;gene expression;mRNA 3'-end processing;mRNA polyadenylation;mRNA processing;nuclear mRNA splicing, via spliceosome;termination of RNA polymerase II transcription;transcription from RNA polymerase II promoter;	cytoplasm;nucleolus;nucleoplasm;nucleus;	mRNA processing factor		9	1	0	0
PCBP2	5094	Q15366	Poly(rC)-binding protein 2;PCBP2	49	POLY(RC)-BINDING PROTEIN 2 (PTHR10288:SF97)	DNA binding;RNA binding;enzyme binding;protein binding;ubiquitin protein ligase binding;	RNA splicing;gene expression;innate immune response;mRNA metabolic process;negative regulation of defense response to virus;negative regulation of type I interferon production;nuclear mRNA splicing, via spliceosome;proteasomal ubiquitin-dependent protein catabolic process;response to virus;	cytoplasm;cytosol;nucleoplasm;nucleus;ribonucleoprotein complex;	mRNA processing factor		6	1	0	1
PDE1B	5153	Q01064	Calcium/calmodulin-dependent 3',5'-cyclic nucleotide phosphodiesterase 1B;PDE1B	36	CALCIUM/CALMODULIN-DEPENDENT 3,5-CYCLIC NUCLEOTIDE PHOSPHODIESTERASE 1B (PTHR11347:SF33)	3',5'-cyclic-AMP phosphodiesterase activity;3',5'-cyclic-GMP phosphodiesterase activity;calcium- and calmodulin-regulated 3',5'-cyclic-GMP phosphodiesterase activity;calmodulin binding;calmodulin-dependent cyclic-nucleotide phosphodiesterase activity;hydrolase activity;metal ion binding;	activation of phospholipase C activity;apoptosis;blood coagulation;cAMP catabolic process;cGMP catabolic process;locomotory behavior;nerve growth factor receptor signaling pathway;platelet activation;regulation of dopamine metabolic process;regulation of neurotransmitter levels;response to amphetamine;serotonin metabolic process;signal transduction;visual learning;	cytoplasm;cytosol;neuronal cell body;nucleolus;nucleus;	phosphodiesterase		3	0	0	0
PHB	5245	P35232	Prohibitin;PHB	47	SUBFAMILY NOT NAMED (PTHR23222:SF0)	histone deacetylase binding;protein binding;transcription regulatory region DNA binding;	DNA replication;cellular response to interleukin-6;glucocorticoid receptor signaling pathway;histone deacetylation;negative regulation of androgen receptor signaling pathway;negative regulation of cell growth;negative regulation of cell proliferation;negative regulation of transcription by competitive promoter binding;negative regulation of transcription from RNA polymerase II promoter;negative r…	cytoplasm;integral to plasma membrane;membrane;mitochondrial inner membrane;mitochondrion;nucleoplasm;nucleus;			79	11	7	2
PHB2	11331	Q99623	Prohibitin-2;PHB2	38	SUBFAMILY NOT NAMED (PTHR23222:SF0)	estrogen receptor binding;protein binding;receptor activity;	negative regulation of transcription, DNA-dependent;	cytoplasm;membrane;mitochondrial inner membrane;mitochondrion;nucleus;			9	3	1	0
PHF5A	84844	Q7RTV0	PHD finger-like domain-containing protein 5A;PHF5A	51	SUBFAMILY NOT NAMED (PTHR13120:SF0)	DNA binding;sequence-specific DNA binding transcription factor activity;	RNA splicing;gene expression;nuclear mRNA splicing, via spliceosome;positive regulation of transcription, DNA-dependent;transcription, DNA-dependent;	U12-type spliceosomal complex;U2 snRNP;nuclear matrix;nuclear speck;nucleoplasm;nucleus;			1	0	0	0
PLK1	5347	P53350	Serine/threonine-protein kinase PLK1;PLK1	57	SUBFAMILY NOT NAMED (PTHR24345:SF10)	ATP binding;anaphase-promoting complex binding;kinase activity;nucleotide binding;polo kinase kinase activity;protein binding;protein kinase activity;protein kinase binding;protein serine/threonine kinase activity;	G2/M transition DNA damage checkpoint;G2/M transition of mitotic cell cycle;M phase of mitotic cell cycle;anaphase-promoting complex-dependent proteasomal ubiquitin-dependent protein catabolic process;cell proliferation;cytokinesis;mitosis;mitotic cell cycle;mitotic metaphase/anaphase transition;mitotic prometaphase;mitotic prophase;negative regulation of cyclin-dependent protein kinase activity;…	centrosome;chromosome;condensed chromosome kinetochore;condensed nuclear chromosome outer kinetochore;cytoplasm;cytoskeleton;cytosol;kinetochore;nucleoplasm;nucleus;spindle microtubule;spindle midzone;spindle pole;	protein kinase		408	37	7	6
PLRG1	5356	O43660	Pleiotropic regulator 1;PLRG1	52	SUBFAMILY NOT NAMED (PTHR19923:SF0)	protein binding;signal transducer activity;transcription corepressor activity;	RNA splicing;nuclear mRNA splicing, via spliceosome;signal transduction;	catalytic step 2 spliceosome;nuclear speck;nucleus;			4	0	0	1
POLA1	5422	P09884	DNA polymerase alpha catalytic subunit;POLA1	38	DNA POLYMERASE ALPHA CATALYTIC SUBUNIT (PTHR10322:SF3)	DNA binding;DNA primase activity;DNA-directed DNA polymerase activity;chromatin binding;double-stranded DNA binding;metal ion binding;nucleoside binding;nucleotide binding;nucleotidyltransferase activity;protein binding;protein heterodimerization activity;purine nucleotide binding;pyrimidine nucleotide binding;transferase activity;	DNA repair;DNA replication;DNA replication checkpoint;DNA replication, synthesis of RNA primer;DNA strand elongation involved in DNA replication;DNA synthesis involved in DNA repair;DNA-dependent DNA replication initiation;G1/S transition of mitotic cell cycle;M/G1 transition of mitotic cell cycle;S phase of mitotic cell cycle;cell proliferation;double-strand break repair via nonhomologous end jo…	alpha DNA polymerase:primase complex;chromatin;cytoplasm;intracellular membrane-bounded organelle;nuclear envelope;nuclear matrix;nucleolus;nucleoplasm;nucleus;	DNA-directed DNA polymerase	DNA replication->Pol alpha;;	1	0	0	0
POLR2A	5430	P24928	DNA-directed RNA polymerase II subunit RPB1;POLR2A	51	DNA-DIRECTED RNA POLYMERASE II LARGEST SUBUNIT (PTHR19376:SF14)	DNA binding;DNA-directed RNA polymerase activity;RNA-directed RNA polymerase activity;metal ion binding;nucleotidyltransferase activity;protein binding;protein kinase activity;transferase activity;ubiquitin protein ligase binding;	DNA repair;RNA splicing;gene expression;mRNA capping;nuclear mRNA splicing, via spliceosome;nucleotide-excision repair;positive regulation of viral transcription;protein phosphorylation;regulation of transcription, DNA-dependent;transcription elongation from RNA polymerase II promoter;transcription from RNA polymerase II promoter;transcription initiation from RNA polymerase II promoter;transcript…	DNA-directed RNA polymerase II, core complex;nucleolus;nucleoplasm;nucleus;	nucleotidyltransferase		18	1	0	1
POLR2D	5433	O15514	DNA-directed RNA polymerase II subunit RPB4;POLR2D	71	SUBFAMILY NOT NAMED (PTHR21297:SF0)	DNA-directed RNA polymerase activity;catalytic activity;nucleotide binding;protein kinase activity;	DNA repair;RNA splicing;cellular metabolic process;gene expression;mRNA capping;nuclear mRNA splicing, via spliceosome;nucleotide-excision repair;positive regulation of viral transcription;protein phosphorylation;transcription elongation from RNA polymerase II promoter;transcription from RNA polymerase II promoter;transcription initiation from RNA polymerase II promoter;transcription-coupled nucl…	DNA-directed RNA polymerase II, core complex;nucleoplasm;nucleus;	transcription factor	General transcription regulation->RNA Polymerase II;;Transcription regulation by bZIP transcription factor->RNA Polymerase II;;;	1	0	0	0
POLR2I	5438	P36954	DNA-directed RNA polymerase II subunit RPB9;POLR2I	63	DNA-DIRECTED RNA POLYMERASE II (PTHR11239:SF1)	DNA binding;DNA-directed RNA polymerase activity;metal ion binding;protein kinase activity;zinc ion binding;	DNA repair;RNA splicing;gene expression;mRNA capping;nuclear mRNA splicing, via spliceosome;nucleotide-excision repair;positive regulation of viral transcription;protein phosphorylation;transcription elongation from RNA polymerase II promoter;transcription from RNA polymerase II promoter;transcription initiation from RNA polymerase II promoter;transcription-coupled nucleotide-excision repair;vira…	DNA-directed RNA polymerase II, core complex;nucleoplasm;nucleus;	nucleotidyltransferase	Transcription regulation by bZIP transcription factor->RNA Polymerase II;;	0	0	0	0
PRDM16	63976	Q9HAZ2	PR domain zinc finger protein 16;PRDM16	46	SUBFAMILY NOT NAMED (PTHR24393:SF183)	metal ion binding;protein binding;sequence-specific DNA binding;transcription coactivator activity;zinc ion binding;	brown fat cell differentiation;cell differentiation;negative regulation of granulocyte differentiation;negative regulation of transcription from RNA polymerase II promoter;negative regulation of transcription, DNA-dependent;negative regulation of transforming growth factor beta receptor signaling pathway;positive regulation of transcription, DNA-dependent;regulation of cellular respiration;	intracellular;nucleus;transcriptional repressor complex;	KRAB box transcription factor		30	1	0	0
PRPF18	8559	Q99633	Pre-mRNA-splicing factor 18;PRPF18	51	PRE-MRNA PROCESSING FACTOR 18 (PTHR13007:SF8)	potassium channel inhibitor activity;	RNA splicing;mRNA processing;	nuclear speck;nucleus;spliceosomal complex;	mRNA processing factor		0	0	0	0
PRPF19	27339	Q9UMS4	Pre-mRNA-processing factor 19;PRPF19	70	PRP19/PSO4 HOMOLOG (NUCLEAR MATRIX PROTEIN 200) (PTHR13889:SF8)	DNA binding;identical protein binding;protein binding;ubiquitin-protein ligase activity;ubiquitin-ubiquitin ligase activity;	DNA repair;RNA splicing;inner cell mass cell proliferation;lipid biosynthetic process;negative regulation of neuron differentiation;nuclear mRNA splicing, via spliceosome;positive regulation of astrocyte differentiation;protein polyubiquitination;spliceosome assembly;	catalytic step 2 spliceosome;cytoplasm;cytoskeleton;lipid particle;nuclear speck;nucleoplasm;nucleus;spindle;ubiquitin ligase complex;	mRNA processing factor		8	1	0	1
PRPF3	9129	O43395	U4/U6 small nuclear ribonucleoprotein Prp3;PRPF3	54	SUBFAMILY NOT NAMED (PTHR14212:SF0)	protein binding;	RNA splicing;RNA splicing, via transesterification reactions;mRNA processing;nuclear mRNA splicing, via spliceosome;	Cajal body;cytoplasm;nuclear speck;nucleolus;nucleus;spliceosomal complex;	mRNA processing factor	mRNA splicing->U4;;mRNA splicing->U6;;;	1	0	0	0
PRPF31	26121	Q8WWY3	U4/U6 small nuclear ribonucleoprotein Prp31;PRPF31	69	SUBFAMILY NOT NAMED (PTHR13904:SF0)	RNA binding;ribonucleoprotein binding;snRNP binding;	RNA splicing;assembly of spliceosomal tri-snRNP;nuclear mRNA splicing, via spliceosome;	Cajal body;MLL1 complex;U2-type spliceosomal complex;U4 snRNP;U4/U6 x U5 tri-snRNP complex;U4atac snRNP;nuclear speck;nucleus;	mRNA processing factor		1	0	1	0
PRPF38A	84950	Q8NAV1	Pre-mRNA-splicing factor 38A;PRPF38A	59	SUBFAMILY NOT NAMED (PTHR23142:SF0)		RNA splicing;mRNA processing;	nucleus;spliceosomal complex;			0	0	0	0
PRPF8	10594	Q6P2Q9	Pre-mRNA-processing-splicing factor 8;PRPF8	65	SUBFAMILY NOT NAMED (PTHR11140:SF0)	RNA binding;protein binding;	RNA splicing;RNA splicing, via transesterification reactions;gene expression;mRNA processing;nuclear mRNA splicing, via spliceosome;	U5 snRNP;catalytic step 2 spliceosome;nuclear speck;nucleoplasm;nucleus;	mRNA processing factor		1	0	0	0
PSMA1	5682	P25786	Proteasome subunit alpha type-1;PSMA1	67	PROTEASOME SUBUNIT ALPHA TYPE 1 (PTHR11599:SF12)	RNA binding;peptidase activity;protein binding;threonine-type endopeptidase activity;	DNA damage response, signal transduction by p53 class mediator resulting in cell cycle arrest;G1/S transition of mitotic cell cycle;M/G1 transition of mitotic cell cycle;RNA metabolic process;S phase of mitotic cell cycle;anaphase-promoting complex-dependent proteasomal ubiquitin-dependent protein catabolic process;apoptosis;cell cycle checkpoint;cellular nitrogen compound metabolic process;mRNA …	cytoplasm;nucleus;polysome;proteasome complex;proteasome core complex, alpha-subunit complex;	protease	Parkinson disease->20S proteasome;;	3	2	0	0
PSMA3	5684	P25788	Proteasome subunit alpha type-3;PSMA3	65	PROTEASOME SUBUNIT ALPHA TYPE 3 (PTHR11599:SF10)	peptidase activity;protein binding;threonine-type endopeptidase activity;	DNA damage response, signal transduction by p53 class mediator resulting in cell cycle arrest;G1/S transition of mitotic cell cycle;M/G1 transition of mitotic cell cycle;RNA metabolic process;S phase of mitotic cell cycle;anaphase-promoting complex-dependent proteasomal ubiquitin-dependent protein catabolic process;apoptosis;cell cycle checkpoint;cellular nitrogen compound metabolic process;inter…	cytoplasm;nucleus;proteasome complex;proteasome core complex;proteasome core complex, alpha-subunit complex;	protease	Parkinson disease->20S proteasome;;	2	0	0	1
PSMA6	5687	P60900	Proteasome subunit alpha type-6;PSMA6	47	PROTEASOME SUBUNIT ALPHA TYPE 6 (PTHR11599:SF11)	NF-kappaB binding;RNA binding;endopeptidase activity;peptidase activity;protein binding;purine ribonucleoside triphosphate binding;threonine-type endopeptidase activity;	DNA damage response, signal transduction by p53 class mediator resulting in cell cycle arrest;G1/S transition of mitotic cell cycle;M/G1 transition of mitotic cell cycle;RNA metabolic process;S phase of mitotic cell cycle;anaphase-promoting complex-dependent proteasomal ubiquitin-dependent protein catabolic process;apoptosis;cell cycle checkpoint;cellular nitrogen compound metabolic process;mRNA …	cytoplasm;mitochondrion;myofibril;nuclear matrix;nucleus;polysome;proteasome core complex;proteasome core complex, alpha-subunit complex;sarcomere;	protease	Parkinson disease->20S proteasome;;	7	1	0	0
PSMB2	5690	P49721	Proteasome subunit beta type-2;PSMB2	68	PROTEASOME SUBUNIT BETA TYPE 2 (PTHR11599:SF6)	peptidase activity;threonine-type endopeptidase activity;	DNA damage response, signal transduction by p53 class mediator resulting in cell cycle arrest;G1/S transition of mitotic cell cycle;M/G1 transition of mitotic cell cycle;RNA metabolic process;S phase of mitotic cell cycle;anaphase-promoting complex-dependent proteasomal ubiquitin-dependent protein catabolic process;apoptosis;cell cycle checkpoint;cellular nitrogen compound metabolic process;inter…	cytoplasm;nucleus;proteasome complex;proteasome core complex;	protease		5	0	1	1
PSMB3	5691	P49720	Proteasome subunit beta type-3;PSMB3	51	PROTEASOME SUBUNIT BETA TYPE 3 (PTHR11599:SF7)	peptidase activity;protein binding;threonine-type endopeptidase activity;	DNA damage response, signal transduction by p53 class mediator resulting in cell cycle arrest;G1/S transition of mitotic cell cycle;M/G1 transition of mitotic cell cycle;RNA metabolic process;S phase of mitotic cell cycle;anaphase-promoting complex-dependent proteasomal ubiquitin-dependent protein catabolic process;apoptosis;cell cycle checkpoint;cellular nitrogen compound metabolic process;inter…	cytoplasm;nucleus;proteasome complex;proteasome core complex;	protease	Parkinson disease->20S proteasome;;	4	1	1	0
PSMB4	5692	P28070	Proteasome subunit beta type-4;PSMB4	52	PROTEASOME SUBUNIT BETA TYPE 4 (PTHR11599:SF5)	lipopolysaccharide binding;peptidase activity;threonine-type endopeptidase activity;	DNA damage response, signal transduction by p53 class mediator resulting in cell cycle arrest;G1/S transition of mitotic cell cycle;M/G1 transition of mitotic cell cycle;RNA metabolic process;S phase of mitotic cell cycle;anaphase-promoting complex-dependent proteasomal ubiquitin-dependent protein catabolic process;apoptosis;cell cycle checkpoint;cellular nitrogen compound metabolic process;inter…	cytoplasm;nucleus;proteasome complex;proteasome core complex;	protease	Parkinson disease->20S proteasome;;	7	0	1	1
PSMC2	5701	P35998	26S protease regulatory subunit 7;PSMC2	62	26S PROTEASE REGULATORY SUBUNIT 7 (PTHR23073:SF13)	ATP binding;ATPase activity;hydrolase activity;nucleotide binding;protein binding;	ATP catabolic process;DNA damage response, signal transduction by p53 class mediator resulting in cell cycle arrest;G1/S transition of mitotic cell cycle;M/G1 transition of mitotic cell cycle;RNA metabolic process;S phase of mitotic cell cycle;anaphase-promoting complex-dependent proteasomal ubiquitin-dependent protein catabolic process;apoptosis;cell cycle checkpoint;cellular nitrogen compound m…	cytoplasm;mitochondrion;nucleolus;nucleus;proteasome complex;	hydrolase	Ubiquitin proteasome pathway->26S proteasome;;	3	0	0	0
PSMC3	5702	P17980	26S protease regulatory subunit 6A;PSMC3	43	26S PROTEASE REGULATORY SUBUNIT 6A (PTHR23073:SF7)	ATP binding;hydrolase activity;nucleoside-triphosphatase activity;nucleotide binding;protein binding;transcription coactivator activity;transcription corepressor activity;	DNA damage response, signal transduction by p53 class mediator resulting in cell cycle arrest;G1/S transition of mitotic cell cycle;M/G1 transition of mitotic cell cycle;RNA metabolic process;S phase of mitotic cell cycle;anaphase-promoting complex-dependent proteasomal ubiquitin-dependent protein catabolic process;apoptosis;blastocyst development;cell cycle checkpoint;cellular nitrogen compound …	cytoplasm;nucleus;proteasome complex;	hydrolase	Ubiquitin proteasome pathway->26S proteasome;;	11	3	0	1
PSMC4	5704	P43686	26S protease regulatory subunit 6B;PSMC4	41	26S PROTEASE REGULATORY SUBUNIT 6B (PTHR23073:SF8)	ATP binding;ATPase activity;hydrolase activity;nucleotide binding;protein binding;	ATP catabolic process;DNA damage response, signal transduction by p53 class mediator resulting in cell cycle arrest;G1/S transition of mitotic cell cycle;M/G1 transition of mitotic cell cycle;RNA metabolic process;S phase of mitotic cell cycle;anaphase-promoting complex-dependent proteasomal ubiquitin-dependent protein catabolic process;apoptosis;blastocyst development;cell cycle checkpoint;cellu…	cytoplasm;mitochondrion;nucleolus;nucleus;proteasome complex;	hydrolase	Ubiquitin proteasome pathway->19S proteasome;;Ubiquitin proteasome pathway->26S proteasome;;;	3	2	0	0
PSMD1	5707	Q99460	26S proteasome non-ATPase regulatory subunit 1;PSMD1	67	26S PROTEASOME NON-ATPASE REGULATORY SUBUNIT 1 (26S PROTEASOME REGULATORY SUBUNIT RPN2) (PTHR10943:SF2)	enzyme regulator activity;protein binding;	DNA damage response, signal transduction by p53 class mediator resulting in cell cycle arrest;G1/S transition of mitotic cell cycle;M/G1 transition of mitotic cell cycle;RNA metabolic process;S phase of mitotic cell cycle;anaphase-promoting complex-dependent proteasomal ubiquitin-dependent protein catabolic process;apoptosis;cell cycle checkpoint;cellular nitrogen compound metabolic process;mRNA …	proteasome complex;proteasome regulatory particle;	enzyme modulator	Ubiquitin proteasome pathway->26S proteasome;;	7	1	0	1
PSMD11	5717	O00231	26S proteasome non-ATPase regulatory subunit 11;PSMD11	44	26S PROTEASOME NON-ATPASE REGULATORY SUBUNIT 11 (26S PROTEASOME REGULATORY SUBUNIT S9) (PTHR10678:SF2)	protein binding;	DNA damage response, signal transduction by p53 class mediator resulting in cell cycle arrest;G1/S transition of mitotic cell cycle;M/G1 transition of mitotic cell cycle;RNA metabolic process;S phase of mitotic cell cycle;anaphase-promoting complex-dependent proteasomal ubiquitin-dependent protein catabolic process;apoptosis;cell cycle checkpoint;cellular nitrogen compound metabolic process;mRNA …	proteasome complex;		Cell cycle->Proteasome;;Ubiquitin proteasome pathway->26S proteasome;;;	1	1	0	0
PSMD12	5718	O00232	26S proteasome non-ATPase regulatory subunit 12;PSMD12	57	26S PROTEASOME NON-ATPASE REGULATORY SUBUNIT 12 (PTHR10855:SF1)	protein binding;	DNA damage response, signal transduction by p53 class mediator resulting in cell cycle arrest;G1/S transition of mitotic cell cycle;M/G1 transition of mitotic cell cycle;RNA metabolic process;S phase of mitotic cell cycle;anaphase-promoting complex-dependent proteasomal ubiquitin-dependent protein catabolic process;apoptosis;cell cycle checkpoint;cellular nitrogen compound metabolic process;mRNA …	proteasome complex;proteasome regulatory particle;	enzyme modulator	Cell cycle->Proteasome;;Ubiquitin proteasome pathway->26S proteasome;;;	1	0	0	0
PSMD3	5709	O43242	26S proteasome non-ATPase regulatory subunit 3;PSMD3	37	26S PROTEASOME NON-ATPASE REGULATORY SUBUNIT 3 (PTHR10758:SF2)	enzyme regulator activity;protein binding;	DNA damage response, signal transduction by p53 class mediator resulting in cell cycle arrest;G1/S transition of mitotic cell cycle;M/G1 transition of mitotic cell cycle;RNA metabolic process;S phase of mitotic cell cycle;anaphase-promoting complex-dependent proteasomal ubiquitin-dependent protein catabolic process;apoptosis;cell cycle checkpoint;cellular nitrogen compound metabolic process;mRNA …	proteasome complex;	enzyme modulator	Cell cycle->Proteasome;;Ubiquitin proteasome pathway->26S proteasome;;;	1	0	0	0
PSMD6	9861	Q15008	26S proteasome non-ATPase regulatory subunit 6;PSMD6	48	26S PROTEASOME NON-ATPASE REGULATORY SUBUNIT 6 (PTHR14145:SF1)	ATPase activity;protein binding;	ATP catabolic process;DNA damage response, signal transduction by p53 class mediator resulting in cell cycle arrest;G1/S transition of mitotic cell cycle;M/G1 transition of mitotic cell cycle;RNA metabolic process;S phase of mitotic cell cycle;anaphase-promoting complex-dependent proteasomal ubiquitin-dependent protein catabolic process;apoptosis;cell cycle checkpoint;cellular nitrogen compound m…	proteasome complex;		Ubiquitin proteasome pathway->26S proteasome;;	0	0	0	0
PSMD7	5713	P51665	26S proteasome non-ATPase regulatory subunit 7;PSMD7	44	26S PROTEASOME NON-ATPASE REGULATORY SUBUNIT 7 (PTHR10540:SF7)	protein binding;	DNA damage response, signal transduction by p53 class mediator resulting in cell cycle arrest;G1/S transition of mitotic cell cycle;M/G1 transition of mitotic cell cycle;RNA metabolic process;S phase of mitotic cell cycle;anaphase-promoting complex-dependent proteasomal ubiquitin-dependent protein catabolic process;apoptosis;cell cycle checkpoint;cellular nitrogen compound metabolic process;mRNA …	proteasome complex;proteasome regulatory particle;		Cell cycle->Proteasome;;Ubiquitin proteasome pathway->26S proteasome;;;	4	3	1	0
PSMD8	5714	P48556	26S proteasome non-ATPase regulatory subunit 8;PSMD8	50	SUBFAMILY NOT NAMED (PTHR12387:SF0)	protein binding;	DNA damage response, signal transduction by p53 class mediator resulting in cell cycle arrest;G1/S transition of mitotic cell cycle;M/G1 transition of mitotic cell cycle;RNA metabolic process;S phase of mitotic cell cycle;anaphase-promoting complex-dependent proteasomal ubiquitin-dependent protein catabolic process;apoptosis;cell cycle checkpoint;cellular nitrogen compound metabolic process;mRNA …	cytoplasm;nucleolus;nucleus;proteasome complex;proteasome regulatory particle;	enzyme modulator	Ubiquitin proteasome pathway->26S proteasome;;	2	1	0	0
PTPN9	5780	P43378	Tyrosine-protein phosphatase non-receptor type 9;PTPN9	37	PROTEIN-TYROSINE PHOSPHATASE N9 (PTHR19134:SF76)	hydrolase activity;non-membrane spanning protein tyrosine phosphatase activity;protein binding;protein tyrosine phosphatase activity;	peptidyl-tyrosine dephosphorylation;protein dephosphorylation;	cytoplasmic part;	receptor		7	2	0	0
RAD51	5888	Q06609	DNA repair protein RAD51 homolog 1;RAD51	47	DNA REPAIR PROTEIN RAD51 (PTHR22942:SF12)	ATP binding;damaged DNA binding;double-stranded DNA binding;identical protein binding;nucleoside-triphosphatase activity;nucleotide binding;protein C-terminus binding;protein binding;single-stranded DNA binding;single-stranded DNA-dependent ATPase activity;	DNA recombinase assembly;DNA recombination;DNA repair;DNA unwinding involved in replication;double-strand break repair;double-strand break repair via homologous recombination;meiosis;mitotic recombination;positive regulation of DNA ligation;protein homooligomerization;reciprocal meiotic recombination;	PML body;condensed chromosome;condensed nuclear chromosome;cytoplasm;lateral element;mitochondrial matrix;mitochondrion;nucleoplasm;nucleus;perinuclear region of cytoplasm;	DNA strand-pairing protein		946	304	85	20
RAN	5901	P62826	GTP-binding nuclear protein Ran;RAN	71	SUBFAMILY NOT NAMED (PTHR24071:SF269)	GTP binding;GTPase activity;androgen receptor binding;chromatin binding;nucleotide binding;protein binding;transcription coactivator activity;	DNA metabolic process;GTP catabolic process;RNA export from nucleus;androgen receptor signaling pathway;cell cycle;cell division;interspecies interaction between organisms;intracellular protein transport;mitosis;mitotic spindle organization;nucleocytoplasmic transport;positive regulation of transcription, DNA-dependent;protein export from nucleus;signal transduction;small GTPase mediated signal t…	chromatin;cytoplasm;cytosol;melanosome;nuclear pore;nucleoplasm;nucleus;	small GTPase		829	76	27	23
RANBP2	5903	P49792	E3 SUMO-protein ligase RanBP2;RANBP2	40	RAN-BINDING PROTEIN 2 (PTHR23138:SF8)	Ran GTPase binding;isomerase activity;metal ion binding;peptidyl-prolyl cis-trans isomerase activity;protein binding;zinc ion binding;	M phase of mitotic cell cycle;carbohydrate metabolic process;glucose transport;hexose transport;intracellular transport;mRNA transport;mitotic cell cycle;mitotic prometaphase;protein folding;protein import into nucleus;protein transport;regulation of glucose transport;transmembrane transport;viral reproduction;	cytosol;nuclear pore;nucleus;	G-protein modulator		29	3	2	0
RBM17	84991	Q96I25	Splicing factor 45;RBM17	63	SPLICING FACTOR 45 (RNA BINDING MOTIF PROTEIN 17) (PTHR13288:SF9)	RNA binding;nucleotide binding;protein binding;	RNA splicing;mRNA processing;	intracellular;nucleus;spliceosomal complex;	mRNA processing factor		2	1	2	1
RBMXL1	494115	Q6YP21	Kynurenine--oxoglutarate transaminase 3;CCBL2	42	KYNURENINE AMINOTRANSFERASE (PTHR11751:SF38)	RNA binding;nucleotide binding;protein homodimerization activity;	RNA splicing;mRNA processing;mRNA splice site selection;	nucleus;spliceosomal complex;	transaminase		1	0	0	0
RFC4	5984	P35249	Replication factor C subunit 4;RFC4	54	SUBFAMILY NOT NAMED (PTHR11669:SF0)	ATP binding;DNA clamp loader activity;nucleoside-triphosphatase activity;nucleotide binding;protein binding;	DNA repair;DNA replication;DNA strand elongation involved in DNA replication;S phase of mitotic cell cycle;cell cycle checkpoint;mitotic cell cycle;nucleotide-excision repair;nucleotide-excision repair, DNA gap filling;phosphatidylinositol-mediated signaling;telomere maintenance;telomere maintenance via recombination;telomere maintenance via semi-conservative replication;transcription-coupled nuc…	DNA replication factor C complex;nucleoplasm;nucleus;	nucleotidyltransferase		23	2	0	1
RFTN1	23180	Q14699	Raftlin;RFTN1	39	SUBFAMILY NOT NAMED (PTHR17601:SF3)			plasma membrane;			0	0	0	0
RGS13	6003	O14921	Regulator of G-protein signaling 13;RGS13	36	REGULATOR OF G PROTEIN SIGNALING 13, RGS13 (PTHR10845:SF32)	GTPase activator activity;signal transducer activity;	negative regulation of G-protein coupled receptor protein signaling pathway;positive regulation of GTPase activity;	cytoplasm;cytosol;nucleus;plasma membrane;	G-protein modulator	Heterotrimeric G-protein signaling pathway-Gi alpha and Gs alpha mediated pathway->Regulator of G-protein signaling;;Inflammation mediated by chemokine and cytokine signaling pathway->Regulator of G-protein Signaling;;Heterotrimeric G-protein signaling pathway-Gq alpha and Go alpha mediated pathway->Regulator of G-protein signaling;;;;	5	0	0	0
RGS18	64407	Q9NS28	regulator of G-protein signaling 18	46		GTPase activator activity;signal transducer activity;	negative regulation of signal transduction;positive regulation of GTPase activity;regulation of G-protein coupled receptor protein signaling pathway;	cytoplasm;plasma membrane;			0	0	0	0
RILPL2	196383	Q969X0	RILP-like protein 2;RILPL2	58	SUBFAMILY NOT NAMED (PTHR21502:SF0)	identical protein binding;		cytoplasm;cytosol;plasma membrane;	nucleic acid binding		0	0	0	0
RPA1	6117	P27694	Replication protein A 70 kDa DNA-binding subunit;RPA1	52	SUBFAMILY NOT NAMED (PTHR23273:SF0)	DNA binding;metal ion binding;protein binding;single-stranded DNA binding;	DNA recombinase assembly;DNA recombination;DNA repair;DNA replication;DNA strand elongation involved in DNA replication;DNA-dependent DNA replication;G1/S transition of mitotic cell cycle;M/G1 transition of mitotic cell cycle;S phase of mitotic cell cycle;cell cycle checkpoint;double-strand break repair;double-strand break repair via homologous recombination;mitotic cell cycle;nucleotide-excision…	DNA replication factor A complex;PML body;actin cytoskeleton;cytoplasm;nucleolus;nucleoplasm;nucleus;	DNA binding protein		152	10	3	1
RPA2	6118	P15927	Replication protein A 32 kDa subunit;RPA2	53	SUBFAMILY NOT NAMED (PTHR13989:SF7)	DNA binding;protein N-terminus binding;protein binding;protein phosphatase binding;single-stranded DNA binding;	DNA recombinase assembly;DNA recombination;DNA repair;DNA replication;DNA strand elongation involved in DNA replication;DNA-dependent DNA replication;G1/S transition of mitotic cell cycle;M/G1 transition of mitotic cell cycle;S phase of mitotic cell cycle;cell cycle checkpoint;double-strand break repair;double-strand break repair via homologous recombination;mitotic cell cycle;nucleotide-excision…	DNA replication factor A complex;PML body;nucleolus;nucleoplasm;nucleus;	DNA binding protein	DNA replication->RPA;;	41	3	0	2
RPL10	6134	P27635	60S ribosomal protein L10;RPL10	38	SUBFAMILY NOT NAMED (PTHR11726:SF6)	structural constituent of ribosome;	cellular protein metabolic process;endocrine pancreas development;gene expression;translation;translational elongation;translational termination;viral infectious cycle;viral reproduction;viral transcription;	cytoplasm;cytosol;cytosolic large ribosomal subunit;endoplasmic reticulum;intracellular;ribosome;	ribosomal protein		6	0	0	1
RPL10A	4736	P62906	60S ribosomal protein L10a;RPL10A	70	60S RIBOSOMAL PROTEIN L10A (PTHR23105:SF4)	RNA binding;structural constituent of ribosome;	anatomical structure morphogenesis;cellular protein metabolic process;endocrine pancreas development;gene expression;translation;translational elongation;translational termination;viral infectious cycle;viral reproduction;viral transcription;	cytosol;intracellular;large ribosomal subunit;	ribosomal protein		4	0	0	0
RPL11	6135	P62913	60S ribosomal protein L11;RPL11	70	60S RIBOSOMAL PROTEIN L11 (PTHR11994:SF2)	RNA binding;protein binding;rRNA binding;structural constituent of ribosome;	cellular protein metabolic process;endocrine pancreas development;gene expression;protein localization to nucleus;protein targeting;rRNA processing;ribosomal large subunit biogenesis;translation;translational elongation;translational termination;viral infectious cycle;viral reproduction;viral transcription;	cytosol;cytosolic large ribosomal subunit;intracellular;nucleolus;nucleus;ribosome;	ribosomal protein		12	0	0	0
RPL12	6136	P30050	60S ribosomal protein L12;RPL12	63	60S RIBOSOMAL PROTEIN L12 (PTHR11661:SF2)	RNA binding;structural constituent of ribosome;	cellular protein metabolic process;endocrine pancreas development;gene expression;translation;translational elongation;translational termination;viral infectious cycle;viral reproduction;viral transcription;	cytosol;ribosome;	ribosomal protein		12	0	0	0
RPL13	6137	P26373	60S ribosomal protein L13;RPL13	52	SUBFAMILY NOT NAMED (PTHR11722:SF0)	RNA binding;protein binding;structural constituent of ribosome;	cellular protein metabolic process;endocrine pancreas development;gene expression;translation;translational elongation;translational termination;viral infectious cycle;viral reproduction;viral transcription;	cytosol;cytosolic ribosome;intracellular;	ribosomal protein		9	2	0	0
RPL14	9045	P50914	60S ribosomal protein L14;RPL14	54	SUBFAMILY NOT NAMED (PTHR11127:SF0)	RNA binding;protein binding;structural constituent of ribosome;	cellular protein metabolic process;endocrine pancreas development;gene expression;rRNA processing;ribosomal large subunit biogenesis;translation;translational elongation;translational termination;viral infectious cycle;viral reproduction;viral transcription;	cytoplasm;cytosol;cytosolic large ribosomal subunit;intracellular;ribosome;	ribosomal protein		4	0	0	0
RPL17	6139	P18621	60S ribosomal protein L17;RPL17	59	SUBFAMILY NOT NAMED (PTHR11593:SF3)	structural constituent of ribosome;	cellular protein metabolic process;endocrine pancreas development;gene expression;translation;translational elongation;translational termination;viral infectious cycle;viral reproduction;viral transcription;	cytosol;intracellular;large ribosomal subunit;			0	0	0	0
RPL18	6141	Q07020	60S ribosomal protein L18;RPL18	69	60S RIBOSOMAL PROTEIN L18 (PTHR10934:SF0)	RNA binding;structural constituent of ribosome;	cellular protein metabolic process;endocrine pancreas development;gene expression;translation;translational elongation;translational termination;viral infectious cycle;viral reproduction;viral transcription;	cytoplasm;cytosol;cytosolic large ribosomal subunit;intracellular;ribosome;	ribosomal protein		1	0	0	0
RPL18A	6142	Q02543	60S ribosomal protein L18a;RPL18A	41	60S RIBOSOMAL PROTEIN L18A (PTHR10052:SF1)	RNA binding;protein binding;structural constituent of ribosome;	cellular protein metabolic process;endocrine pancreas development;gene expression;translation;translational elongation;translational termination;viral infectious cycle;viral reproduction;viral transcription;	cytosol;cytosolic large ribosomal subunit;ribosome;	ribosomal protein		1	0	0	0
RPL19	6143	P84098	60S ribosomal protein L19;RPL19	59	60S RIBOSOMAL PROTEIN L19 (PTHR10722:SF0)	RNA binding;structural constituent of ribosome;	cellular protein metabolic process;endocrine pancreas development;gene expression;translation;translational elongation;translational termination;viral infectious cycle;viral reproduction;viral transcription;	cytosol;cytosolic large ribosomal subunit;intracellular;ribosome;	ribosomal protein		17	6	0	1
RPL23	9349	P62829	60S ribosomal protein L23;RPL23	68	60S RIBOSOMAL PROTEIN L23 (PTHR11761:SF4)	protein binding;structural constituent of ribosome;	cellular protein metabolic process;endocrine pancreas development;gene expression;ribosomal protein import into nucleus;translation;translational elongation;translational termination;viral infectious cycle;viral reproduction;viral transcription;	cytoplasm;cytosol;nucleolus;ribosome;	ribosomal protein		3	0	0	0
RPL23A	6147	P62750	60S ribosomal protein L23a;RPL23A	66	SUBFAMILY NOT NAMED (PTHR11620:SF2)	nucleotide binding;protein binding;rRNA binding;structural constituent of ribosome;	cell proliferation;cellular protein metabolic process;endocrine pancreas development;gene expression;translation;translational elongation;translational termination;viral infectious cycle;viral reproduction;viral transcription;	TORC2 complex;cytosol;cytosolic large ribosomal subunit;intracellular;nucleus;ribosome;	ribosomal protein		2	1	0	0
RPL24	6152	P83731	60S ribosomal protein L24;RPL24	60	60S RIBOSOMAL PROTEIN L24 (PTHR10792:SF1)	RNA binding;protein binding;structural constituent of ribosome;	cellular protein metabolic process;endocrine pancreas development;gene expression;translation;translational elongation;translational termination;viral infectious cycle;viral reproduction;viral transcription;	cytosol;cytosolic large ribosomal subunit;ribosome;	ribosomal protein		1	0	0	0
RPL27	6155	P61353	60S ribosomal protein L27;RPL27	64	60S RIBOSOMAL PROTEIN L27 (PTHR10497:SF0)	structural constituent of ribosome;	cellular protein metabolic process;endocrine pancreas development;gene expression;translation;translational elongation;translational termination;viral infectious cycle;viral reproduction;viral transcription;	cytosol;intracellular;ribonucleoprotein complex;ribosome;	ribosomal protein		4	0	0	0
RPL3	6122	P39023	60S ribosomal protein L3;RPL3	61	SUBFAMILY NOT NAMED (PTHR11363:SF0)	RNA binding;protein binding;structural constituent of ribosome;	cellular protein metabolic process;endocrine pancreas development;gene expression;translation;translational elongation;translational termination;viral infectious cycle;viral reproduction;viral transcription;	cytoplasm;cytosol;cytosolic large ribosomal subunit;intracellular;nucleolus;ribosome;	ribosomal protein	De novo pyrimidine deoxyribonucleotide biosynthesis->dTDP kinase;;De novo purine biosynthesis->dADP kinase;;De novo pyrimidine deoxyribonucleotide biosynthesis->dCDP kinase;;De novo pyrimidine deoxyribonucleotide biosynthesis->dUDP kinase;;De novo pyrmidine ribonucleotides biosythesis->CDP kinase;;;;;;	4	0	0	0
RPL30	6156	P62888	60S ribosomal protein L30;RPL30	53	60S RIBOSOMAL PROTEIN L30 (PTHR11449:SF1)	RNA binding;structural constituent of ribosome;	cellular protein metabolic process;endocrine pancreas development;gene expression;translation;translational elongation;translational termination;viral infectious cycle;viral reproduction;viral transcription;	cytoplasm;cytosol;cytosolic large ribosomal subunit;intracellular;ribosome;	ribosomal protein		18	1	0	1
RPL31	6160	P62899	60S ribosomal protein L31;RPL31	69	60S RIBOSOMAL PROTEIN L31 (PTHR10956:SF0)	RNA binding;protein binding;structural constituent of ribosome;	cellular protein metabolic process;endocrine pancreas development;gene expression;translation;translational elongation;translational termination;viral infectious cycle;viral reproduction;viral transcription;	cytosol;cytosolic large ribosomal subunit;intracellular;ribosome;	ribosomal protein		3	1	0	0
RPL32	6161	P62910	60S ribosomal protein L32;RPL32	72	60S RIBOSOMAL PROTEIN L32 (PTHR23413:SF1)	protein binding;structural constituent of ribosome;	cellular protein metabolic process;endocrine pancreas development;gene expression;translation;translational elongation;translational termination;viral infectious cycle;viral reproduction;viral transcription;	cytosol;intracellular;ribosome;	ribosomal protein		18	1	0	1
RPL34	6164	P49207	60S ribosomal protein L34;RPL34	60	60S RIBOSOMAL PROTEIN L34 (PTHR10759:SF0)	RNA binding;protein binding;structural constituent of ribosome;	cellular protein metabolic process;endocrine pancreas development;gene expression;translation;translational elongation;translational termination;viral infectious cycle;viral reproduction;viral transcription;	cytosol;cytosolic large ribosomal subunit;intracellular;ribosome;	ribosomal protein		1	0	0	0
RPL35	11224	P42766	60S ribosomal protein L35;RPL35	61	SUBFAMILY NOT NAMED (PTHR13872:SF5)	mRNA binding;protein binding;structural constituent of ribosome;	cellular protein metabolic process;endocrine pancreas development;gene expression;translation;translational elongation;translational termination;viral infectious cycle;viral reproduction;viral transcription;	cytoplasm;cytosol;cytosolic large ribosomal subunit;intracellular;nucleolus;ribosome;	glycosyltransferase		1	0	0	0
RPL35A	6165	P18077	60S ribosomal protein L35a;RPL35A	49	60S RIBOSOMAL PROTEIN L35A (PTHR10902:SF0)	protein binding;structural constituent of ribosome;tRNA binding;	cellular protein metabolic process;endocrine pancreas development;gene expression;rRNA processing;ribosomal large subunit biogenesis;translation;translational elongation;translational termination;viral infectious cycle;viral reproduction;viral transcription;	cytosol;intracellular;ribosome;	ribosomal protein		12	0	0	0
RPL36	25873	Q9Y3U8	60S ribosomal protein L36;RPL36	69	60S RIBOSOMAL PROTEIN L36 (PTHR10114:SF0)	protein binding;structural constituent of ribosome;	cellular protein metabolic process;endocrine pancreas development;gene expression;translation;translational elongation;translational termination;viral infectious cycle;viral reproduction;viral transcription;	cytosol;cytosolic large ribosomal subunit;intracellular;nucleolus;ribosome;	ribosomal protein		1	0	0	0
RPL37	6167	P61927	60S ribosomal protein L37;RPL37	60	60S RIBOSOMAL PROTEIN L37 (PTHR10768:SF0)	RNA binding;metal ion binding;protein binding;rRNA binding;structural constituent of ribosome;	cellular protein metabolic process;endocrine pancreas development;gene expression;translation;translational elongation;translational termination;viral infectious cycle;viral reproduction;viral transcription;	cytosol;cytosolic large ribosomal subunit;intracellular;ribosome;	ribosomal protein		5	1	0	0
RPL37A	6168	P61513	60S ribosomal protein L37a;RPL37A	66	60S RIBOSOMAL PROTEIN L37A (PTHR11517:SF1)	metal ion binding;protein binding;structural constituent of ribosome;	cellular protein metabolic process;endocrine pancreas development;gene expression;translation;translational elongation;translational termination;viral infectious cycle;viral reproduction;viral transcription;	cytosol;intracellular;ribosome;	ribosomal protein		7	3	0	0
RPL39	6170	P62891	60S ribosomal protein L39;RPL39	41	SUBFAMILY NOT NAMED (PTHR19970:SF0)	RNA binding;structural constituent of ribosome;	cellular protein metabolic process;endocrine pancreas development;gene expression;translation;translational elongation;translational termination;viral infectious cycle;viral reproduction;viral transcription;	cytosol;cytosolic large ribosomal subunit;intracellular;ribosome;	ribosomal protein		1	1	1	0
RPL4	6124	P36578	60S ribosomal protein L4;RPL4	57	SUBFAMILY NOT NAMED (PTHR19431:SF0)	RNA binding;protein binding;structural constituent of ribosome;	cellular protein metabolic process;endocrine pancreas development;gene expression;translation;translational elongation;translational termination;viral infectious cycle;viral reproduction;viral transcription;	cytoplasm;cytosol;cytosolic large ribosomal subunit;nucleolus;nucleus;ribonucleoprotein complex;			7	0	1	1
RPL5	6125	P46777	60S ribosomal protein L5;RPL5	66	SUBFAMILY NOT NAMED (PTHR23410:SF3)	5S rRNA binding;RNA binding;protein binding;structural constituent of ribosome;	cellular protein metabolic process;endocrine pancreas development;gene expression;rRNA processing;ribosomal large subunit biogenesis;translation;translational elongation;translational termination;viral infectious cycle;viral reproduction;viral transcription;	cytoplasm;cytosol;cytosolic large ribosomal subunit;intracellular;nucleolus;nucleus;ribonucleoprotein complex;ribosome;	ribosomal protein		12	0	0	0
RPL6	6128	Q02878	60S ribosomal protein L6;RPL6	55	60S RIBOSOMAL PROTEIN L6 (PTHR10715:SF0)	DNA binding;RNA binding;structural constituent of ribosome;	cellular protein metabolic process;endocrine pancreas development;gene expression;regulation of transcription, DNA-dependent;translation;translational elongation;translational termination;viral infectious cycle;viral reproduction;viral transcription;	cytosol;cytosolic large ribosomal subunit;intracellular;ribosome;	ribosomal protein		8	1	0	1
RPL7	6129	P18124	60S ribosomal protein L7;RPL7	68	SUBFAMILY NOT NAMED (PTHR11524:SF5)	DNA binding;RNA binding;mRNA binding;protein homodimerization activity;structural constituent of ribosome;	cellular protein metabolic process;endocrine pancreas development;gene expression;rRNA processing;ribosomal large subunit biogenesis;translation;translational elongation;translational termination;viral infectious cycle;viral reproduction;viral transcription;	cytosol;cytosolic large ribosomal subunit;intracellular;ribonucleoprotein complex;	ribosomal protein		8	1	0	0
RPL7A	6130	P62424	60S ribosomal protein L7a;RPL7A	62	60S RIBOSOMAL PROTEIN L7A (PTHR23105:SF1)	RNA binding;structural constituent of ribosome;	cellular protein metabolic process;endocrine pancreas development;gene expression;ribosome biogenesis;translation;translational elongation;translational termination;viral infectious cycle;viral reproduction;viral transcription;	cytosol;cytosolic large ribosomal subunit;membrane fraction;polysomal ribosome;	ribosomal protein		19	1	0	0
RPL9	6133	P32969	ribosomal protein L9	71		RNA binding;rRNA binding;structural constituent of ribosome;	cellular protein metabolic process;endocrine pancreas development;gene expression;translation;translational elongation;translational termination;viral infectious cycle;viral reproduction;viral transcription;	cytoplasm;cytosol;intracellular;nucleolus;ribosome;			3	0	0	0
RPLP0	6175	P05388	60S acidic ribosomal protein P0;RPLP0	65	SUBFAMILY NOT NAMED (PTHR21141:SF7)	RNA binding;protein binding;structural constituent of ribosome;	cellular protein metabolic process;endocrine pancreas development;gene expression;interspecies interaction between organisms;ribosome biogenesis;translation;translational elongation;translational termination;viral infectious cycle;viral reproduction;viral transcription;	cytoplasm;cytosol;cytosolic large ribosomal subunit;intracellular;nucleus;ribonucleoprotein complex;ribosome;	ribosomal protein		20	8	2	0
RPLP1	6176	P05386	60S acidic ribosomal protein P1;RPLP1	40	60S ACIDIC RIBOSOMAL PROTEIN P1 (PTHR21141:SF6)	RNA binding;protein binding;structural constituent of ribosome;	cellular protein metabolic process;endocrine pancreas development;gene expression;translation;translational elongation;translational termination;viral infectious cycle;viral reproduction;viral transcription;	cytoplasm;cytosol;cytosolic large ribosomal subunit;intracellular;ribosome;	ribosomal protein		3	0	1	0
RPRD1A	55197	Q96P16	Regulation of nuclear pre-mRNA domain-containing protein 1A;RPRD1A	38	SUBFAMILY NOT NAMED (PTHR12460:SF0)				kinase inhibitor		0	0	0	0
RPS11	6205	P62280	40S ribosomal protein S11;RPS11	67	40S RIBOSOMAL PROTEIN S11 (PTHR10744:SF2)	protein binding;rRNA binding;structural constituent of ribosome;	cellular protein metabolic process;endocrine pancreas development;gene expression;translation;translational elongation;translational termination;viral infectious cycle;viral reproduction;viral transcription;	cytosol;cytosolic small ribosomal subunit;intracellular;ribosome;	ribosomal protein		2	0	0	0
RPS12	6206	P25398	40S ribosomal protein S12;RPS12	38	SUBFAMILY NOT NAMED (PTHR11843:SF0)	molecular_function;structural constituent of ribosome;	cellular protein metabolic process;endocrine pancreas development;gene expression;translation;translational elongation;translational termination;viral infectious cycle;viral reproduction;viral transcription;	cytoplasm;cytosol;cytosolic small ribosomal subunit;intracellular;ribosome;	ribosomal protein		6	1	0	0
RPS13	6207	P62277	40S ribosomal protein S13;RPS13	72	40S RIBOSOMAL PROTEIN S13 (PTHR11885:SF1)	mRNA binding;protein binding;structural constituent of ribosome;	cellular protein metabolic process;endocrine pancreas development;gene expression;negative regulation of RNA splicing;translation;translational elongation;translational termination;viral infectious cycle;viral reproduction;viral transcription;	cytosol;cytosolic small ribosomal subunit;intracellular;nucleolus;nucleus;ribosome;	ribosomal protein		7	0	0	0
RPS14	6208	P62263	40S ribosomal protein S14;RPS14	68	40S RIBOSOMAL PROTEIN S14 (PTHR11759:SF1)	RNA binding;mRNA 5'-UTR binding;protein binding;structural constituent of ribosome;translation regulator activity;	cellular protein metabolic process;endocrine pancreas development;erythrocyte differentiation;gene expression;maturation of SSU-rRNA;negative regulation of transcription from RNA polymerase II promoter;regulation of translation;ribosomal small subunit assembly;translation;translational elongation;translational termination;viral infectious cycle;viral reproduction;viral transcription;	cytosol;cytosolic small ribosomal subunit;intracellular;mitochondrion;nucleolus;ribosome;	ribosomal protein		18	0	0	1
RPS15A	6210	P62244	40S ribosomal protein S15a;RPS15A	68	SUBFAMILY NOT NAMED (PTHR11758:SF4)	RNA binding;protein binding;structural constituent of ribosome;	cellular protein metabolic process;endocrine pancreas development;gene expression;positive regulation of cell cycle;positive regulation of cell proliferation;response to virus;translation;translational elongation;translational termination;viral infectious cycle;viral reproduction;viral transcription;	cytoplasm;cytosol;cytosolic small ribosomal subunit;intracellular;ribosome;	ribosomal protein		2	0	0	0
RPS17	6218	P08708	40S ribosomal protein S17;RPS17	69	40S RIBOSOMAL PROTEIN S17 (PTHR10732:SF0)	structural constituent of ribosome;	cellular protein metabolic process;endocrine pancreas development;erythrocyte homeostasis;gene expression;rRNA processing;ribosomal small subunit assembly;ribosomal small subunit biogenesis;translation;translational elongation;translational initiation;translational termination;viral infectious cycle;viral reproduction;viral transcription;	cytosol;cytosolic small ribosomal subunit;intracellular;ribosome;	ribosomal protein		10	0	0	0
RPS18	6222	P62269	40S ribosomal protein S18;RPS18	60	40S RIBOSOMAL PROTEIN S18 (PTHR10871:SF2)	molecular_function;rRNA binding;structural constituent of ribosome;	cellular protein metabolic process;endocrine pancreas development;gene expression;ribosome biogenesis;translation;translational elongation;translational termination;viral infectious cycle;viral reproduction;viral transcription;	cytoplasm;cytosol;cytosolic small ribosomal subunit;intracellular;ribosome;small ribosomal subunit;	ribosomal protein		9	3	0	0
RPS19	6223	P39019	40S ribosomal protein S19;RPS19	70	SUBFAMILY NOT NAMED (PTHR11710:SF0)	RNA binding;protein binding;structural constituent of ribosome;	anatomical structure development;cellular protein metabolic process;endocrine pancreas development;erythrocyte differentiation;gas transport;gene expression;positive regulation of cellular component movement;rRNA processing;response to extracellular stimulus;ribosomal small subunit biogenesis;translation;translational elongation;translational termination;viral infectious cycle;viral reproduction;…	cytosol;cytosolic small ribosomal subunit;intracellular;nucleolus;nucleus;ribosome;	ribosomal protein		17	0	0	0
RPS20	6224	P60866	40S ribosomal protein S20;RPS20	59	40S RIBOSOMAL PROTEIN S20 (PTHR11700:SF3)	RNA binding;protein binding;structural constituent of ribosome;	cellular protein metabolic process;endocrine pancreas development;gene expression;translation;translational elongation;translational termination;viral infectious cycle;viral reproduction;viral transcription;	cytoplasm;cytosol;cytosolic small ribosomal subunit;intracellular;	ribosomal protein		3	0	0	0
RPS25	6230	P62851	40S ribosomal protein S25;RPS25	37	SUBFAMILY NOT NAMED (PTHR12850:SF4)	RNA binding;protein binding;	cellular protein metabolic process;endocrine pancreas development;gene expression;translation;translational elongation;translational termination;viral infectious cycle;viral reproduction;viral transcription;	cytoplasm;cytosol;cytosolic small ribosomal subunit;nucleolus;ribosome;small ribosomal subunit;			5	0	0	0
RPS26	6231	P62854	40S ribosomal protein S26;RPS26	72	SUBFAMILY NOT NAMED (PTHR12538:SF0)	mRNA binding;protein binding;structural constituent of ribosome;	cellular protein metabolic process;endocrine pancreas development;gene expression;negative regulation of RNA splicing;translation;translational elongation;translational termination;viral infectious cycle;viral reproduction;viral transcription;	cytosol;cytosolic small ribosomal subunit;intracellular;small ribosomal subunit;	ribosomal protein		4	0	0	0
RPS27A	6233	P62979	40S ribosomal protein S27a;RPS27A	67	SUBFAMILY NOT NAMED (PTHR24691:SF2)	metal ion binding;structural constituent of ribosome;	DNA damage response, signal transduction by p53 class mediator resulting in cell cycle arrest;DNA repair;G1/S transition of mitotic cell cycle;I-kappaB kinase/NF-kappaB cascade;JNK cascade;M/G1 transition of mitotic cell cycle;MyD88-dependent toll-like receptor signaling pathway;MyD88-independent toll-like receptor signaling pathway;RNA metabolic process;S phase of mitotic cell cycle;T cell recep…	cytoplasm;cytosol;cytosolic small ribosomal subunit;endocytic vesicle membrane;endosome membrane;intracellular;nucleoplasm;nucleus;plasma membrane;small ribosomal subunit;	ribosomal protein		3	0	0	0
RPS29	6235	P62273	40S ribosomal protein S29;RPS29	62	SUBFAMILY NOT NAMED (PTHR12010:SF2)	metal ion binding;protein binding;structural constituent of ribosome;zinc ion binding;	cellular protein metabolic process;endocrine pancreas development;gene expression;translation;translational elongation;translational termination;viral infectious cycle;viral reproduction;viral transcription;	cytoplasm;cytosol;cytosolic small ribosomal subunit;intracellular;small ribosomal subunit;			7	0	0	0
RPS3	6188	P23396	40S ribosomal protein S3;RPS3	57	40S RIBOSOMAL PROTEIN S3 (PTHR11760:SF9)	DNA-(apurinic or apyrimidinic site) lyase activity;NF-kappaB binding;damaged DNA binding;endonuclease activity;iron-sulfur cluster binding;mRNA binding;protein binding;protein kinase binding;structural constituent of ribosome;	activation of caspase activity;cellular protein metabolic process;endocrine pancreas development;gene expression;induction of apoptosis;negative regulation of DNA repair;negative regulation of NF-kappaB transcription factor activity;response to DNA damage stimulus;translation;translational elongation;translational initiation;translational termination;viral infectious cycle;viral reproduction;vira…	cytoplasm;cytosol;cytosolic small ribosomal subunit;intracellular;nucleus;ribonucleoprotein complex;ruffle membrane;	ribosomal protein		5	1	0	0
RPS3A	6189	P61247	40S ribosomal protein S3a;RPS3A	60	SUBFAMILY NOT NAMED (PTHR11830:SF2)	RNA binding;protein binding;structural constituent of ribosome;	cell differentiation;cellular protein metabolic process;endocrine pancreas development;gene expression;induction of apoptosis;translation;translational elongation;translational initiation;translational termination;viral infectious cycle;viral reproduction;viral transcription;	cytoplasm;cytosol;cytosolic small ribosomal subunit;intracellular;nucleolus;nucleus;ribonucleoprotein complex;ribosome;	ribosomal protein		10	0	0	0
RPS4X	6191	P62701	40S ribosomal protein S4, X isoform;RPS4X	36	SUBFAMILY NOT NAMED (PTHR11581:SF0)	rRNA binding;structural constituent of ribosome;	cellular protein metabolic process;endocrine pancreas development;gene expression;multicellular organismal development;positive regulation of cell proliferation;positive regulation of translation;translation;translational elongation;translational termination;viral infectious cycle;viral reproduction;viral transcription;	cytoplasm;cytosol;cytosolic small ribosomal subunit;intracellular;polysome;ribonucleoprotein complex;ribosome;small ribosomal subunit;	ribosomal protein		4	1	0	0
RPS6	6194	P62753	40S ribosomal protein S6;RPS6	62	SUBFAMILY NOT NAMED (PTHR11502:SF3)	protein binding;structural constituent of ribosome;	TOR signaling cascade;cellular protein metabolic process;endocrine pancreas development;gene expression;glucose homeostasis;insulin receptor signaling pathway;positive regulation of apoptosis;rRNA processing;ribosomal small subunit assembly;ribosomal small subunit biogenesis;translation;translational elongation;translational termination;viral infectious cycle;viral reproduction;viral transcriptio…	cytosol;cytosolic small ribosomal subunit;intracellular;nucleolus;nucleus;ribonucleoprotein complex;small ribosomal subunit;	ribosomal protein		51	5	3	5
RPS7	6201	P62081	40S ribosomal protein S7;RPS7	71	SUBFAMILY NOT NAMED (PTHR11278:SF0)	RNA binding;protein binding;structural constituent of ribosome;	cellular protein metabolic process;endocrine pancreas development;gene expression;rRNA processing;ribosomal small subunit biogenesis;translation;translational elongation;translational termination;viral infectious cycle;viral reproduction;viral transcription;	90S preribosome;cytosol;cytosolic small ribosomal subunit;intracellular;nucleolus;nucleus;ribonucleoprotein complex;ribosome;small-subunit processome;	ribosomal protein		3	0	0	0
RPS8	6202	P62241	40S ribosomal protein S8;RPS8	67	40S RIBOSOMAL PROTEIN S8 (PTHR10394:SF1)	molecular_function;protein binding;structural constituent of ribosome;	cellular protein metabolic process;endocrine pancreas development;gene expression;maturation of SSU-rRNA from tricistronic rRNA transcript (SSU-rRNA, 5.8S rRNA, LSU-rRNA);translation;translational elongation;translational termination;viral infectious cycle;viral reproduction;viral transcription;	cytoplasm;cytosol;cytosolic small ribosomal subunit;intracellular;ribonucleoprotein complex;ribosome;	ribosomal protein		4	0	0	1
RPS9	6203	P46781	40S ribosomal protein S9;RPS9	50	40S RIBOSOMAL PROTEIN S9 (PTHR11831:SF3)	protein binding;rRNA binding;structural constituent of ribosome;translation regulator activity;	cellular protein metabolic process;endocrine pancreas development;gene expression;positive regulation of cell proliferation;regulation of translation;translation;translational elongation;translational termination;viral infectious cycle;viral reproduction;viral transcription;	cytoplasm;cytosol;cytosolic small ribosomal subunit;intracellular;nucleolus;ribonucleoprotein complex;ribosome;	ribosomal protein		10	1	0	1
RPSA	3921	P08865	40S ribosomal protein SA;RPSA	63	SUBFAMILY NOT NAMED (PTHR11489:SF8)	protein binding;receptor activity;ribosome binding;structural constituent of ribosome;	cell adhesion;cellular protein metabolic process;endocrine pancreas development;endonucleolytic cleavage in ITS1 to separate SSU-rRNA from 5.8S rRNA and LSU-rRNA from tricistronic rRNA transcript (SSU-rRNA, 5.8S rRNA, LSU-rRNA);endonucleolytic cleavage to generate mature 3'-end of SSU-rRNA from (SSU-rRNA, 5.8S rRNA, LSU-rRNA);gene expression;rRNA export from nucleus;ribosomal small subunit assemb…	90S preribosome;cytoplasm;cytosol;cytosolic small ribosomal subunit;intracellular;nucleus;plasma membrane;	ribosomal protein		16	1	0	0
RPSAP58	388524		ribosomal protein SA pseudogene 58	54							0	0	0	0
RPTOR	57521	F5H7J5	regulatory associated protein of MTOR, complex 1	43		protein binding;protein complex binding;	TOR signaling cascade;cell cycle arrest;cell growth;cellular response to amino acid stimulus;cellular response to nutrient levels;insulin receptor signaling pathway;positive regulation of TOR signaling cascade;positive regulation of protein serine/threonine kinase activity;regulation of cell size;	TORC1 complex;cytoplasm;cytosol;lysosome;			34	2	0	0
RRM1	6240	P23921	Ribonucleoside-diphosphate reductase large subunit;RRM1	59	RIBONUCLEOSIDE-DIPHOSPHATE REDUCTASE LARGE CHAIN (PTHR11573:SF6)	ATP binding;oxidoreductase activity;purine nucleotide binding;ribonucleoside-diphosphate reductase activity;	DNA replication;deoxyribonucleotide biosynthetic process;nucleobase, nucleoside and nucleotide interconversion;nucleobase, nucleoside and nucleotide metabolic process;protein heterotetramerization;protein oligomerization;	cytoplasm;cytosol;nucleoplasm;ribonucleoside-diphosphate reductase complex;	reductase	De novo purine biosynthesis->ADP reductase;;De novo pyrimidine deoxyribonucleotide biosynthesis->UDP reductase;;De novo purine biosynthesis->GDP reductase;;De novo pyrimidine deoxyribonucleotide biosynthesis->CDP Reductase;;;;;	174	20	3	19
RTF1	23168	Q92541	RNA polymerase-associated protein RTF1 homolog;RTF1	40	SUBFAMILY NOT NAMED (PTHR13115:SF8)	DNA binding;protein binding;single-stranded DNA binding;	histone modification;regulation of transcription, DNA-dependent;transcription initiation, DNA-dependent;	nucleolus;nucleoplasm;nucleus;			3	0	0	0
RUVBL2	10856	Q9Y230	RuvB-like 2;RUVBL2	52	RUVB-LIKE 2 (REPTIN) (PTHR11093:SF2)	ATP binding;ATP-dependent DNA helicase activity;ATPase activity;DNA helicase activity;damaged DNA binding;hydrolase activity;identical protein binding;nucleotide binding;protein binding;unfolded protein binding;	ATP catabolic process;DNA recombination;DNA repair;cellular response to UV;chromatin modification;histone H2A acetylation;histone H4 acetylation;protein folding;regulation of growth;regulation of transcription, DNA-dependent;	Ino80 complex;MLL1 complex;NuA4 histone acetyltransferase complex;cytoplasm;intracellular;membrane;nuclear matrix;nucleoplasm;nucleus;ribonucleoprotein complex;	transcription cofactor		28	3	0	0
SCRG1	11341	O75711	Scrapie-responsive protein 1;SCRG1	55	SUBFAMILY NOT NAMED (PTHR17463:SF0)		nervous system development;	extracellular region;extracellular space;			0	0	0	0
SDAD1	55153	Q9NVU7	Protein SDA1 homolog;SDAD1	44	SUBFAMILY NOT NAMED (PTHR12730:SF0)	molecular_function;protein binding;	protein transport;ribosomal large subunit biogenesis;	nucleolus;nucleus;			0	0	0	0
SEC61A1	29927	P61619	Protein transport protein Sec61 subunit alpha isoform 1;SEC61A1	47	PROTEIN TRANSPORT PROTEIN SEC61 SUBUNIT ALPHA ISOFORM 1 (SEC61 ALPHA-1) (PTHR10906:SF4)	P-P-bond-hydrolysis-driven protein transmembrane transporter activity;protein binding;ribosome binding;	protein targeting to ER;protein transport;response to interferon-gamma;transmembrane transport;	endoplasmic reticulum;endoplasmic reticulum membrane;integral to endoplasmic reticulum membrane;integral to membrane;membrane;rough microsome;	transporter		5	0	0	0
SF3A1	10291	Q15459	Splicing factor 3 subunit 1;SF3A1	64	SUBFAMILY NOT NAMED (PTHR15316:SF0)	RNA binding;protein binding;	RNA splicing;gene expression;mRNA processing;nuclear mRNA 3'-splice site recognition;nuclear mRNA splicing, via spliceosome;	U2-type spliceosomal complex;catalytic step 2 spliceosome;nucleolus;nucleoplasm;nucleus;spliceosomal complex;	mRNA processing factor		1	1	0	0
SF3A2	8175	Q15428	Splicing factor 3A subunit 2;SF3A2	49	SUBFAMILY NOT NAMED (PTHR23205:SF0)	metal ion binding;nucleic acid binding;zinc ion binding;	RNA splicing;gene expression;mRNA processing;nuclear mRNA 3'-splice site recognition;nuclear mRNA splicing, via spliceosome;	catalytic step 2 spliceosome;intracellular;nucleoplasm;nucleus;small nuclear ribonucleoprotein complex;spliceosomal complex;	mRNA processing factor		0	0	0	0
SF3B1	23451	O75533	Splicing factor 3B subunit 1;SF3B1	47	SUBFAMILY NOT NAMED (PTHR12097:SF0)	chromatin binding;protein binding;	RNA splicing;RNA splicing, via transesterification reactions;anterior/posterior pattern formation;gene expression;nuclear mRNA splicing, via spliceosome;	U12-type spliceosomal complex;catalytic step 2 spliceosome;nuclear speck;nucleoplasm;nucleus;spliceosomal complex;	mRNA processing factor		11	0	0	0
SF3B2	10992	Q13435	Splicing factor 3B subunit 2;SF3B2	70	SUBFAMILY NOT NAMED (PTHR12785:SF6)	nucleic acid binding;protein binding;	RNA splicing;gene expression;interspecies interaction between organisms;mRNA processing;nuclear mRNA splicing, via spliceosome;	U12-type spliceosomal complex;catalytic step 2 spliceosome;nucleoplasm;nucleus;spliceosomal complex;			3	1	0	0
SF3B3	23450	Q15393	Splicing factor 3B subunit 3;SF3B3	48	SPLICING FACTOR 3B SUBUNIT 3 (SPLICEOSOME-ASSOCIATED PROTEIN 130)(SAP 130) (PTHR10644:SF1)	nucleic acid binding;protein binding;	RNA splicing;RNA splicing, via transesterification reactions;gene expression;mRNA processing;nuclear mRNA splicing, via spliceosome;protein complex assembly;	U12-type spliceosomal complex;catalytic step 2 spliceosome;nucleoplasm;nucleus;small nuclear ribonucleoprotein complex;spliceosomal complex;	damaged DNA-binding protein		1	1	0	0
SF3B5	83443	Q9BWJ5	Splicing factor 3B subunit 5;SF3B5	69	SUBFAMILY NOT NAMED (PTHR20978:SF0)		RNA splicing;gene expression;nuclear mRNA splicing, via spliceosome;	U12-type spliceosomal complex;nucleoplasm;nucleus;			0	0	0	0
SFPQ	6421	P23246	Splicing factor, proline- and glutamine-rich;SFPQ	59	SPLICING FACTOR, PROLINE-AND GLUTAMINE-RICH (PTB-ASSOCIATED SPLICING FACTOR) (PTHR23189:SF13)	DNA binding;RNA binding;nucleotide binding;protein binding;	DNA recombination;DNA repair;RNA splicing;alternative nuclear mRNA splicing, via spliceosome;mRNA processing;regulation of transcription, DNA-dependent;	nuclear matrix;nucleoplasm;nucleus;paraspeckles;	mRNA processing factor		6	0	0	0
SFRS1	6426	Q07955	Splicing factor, arginine/serine-rich 1;SFRS1	68	SPLICING FACTOR, ARGININE/SERINE-RICH 1 (PTHR10548:SF10)	RNA binding;RS domain binding;nucleotide binding;protein binding;	RNA splicing;cardiac muscle contraction;gene expression;in utero embryonic development;mRNA 3'-end processing;mRNA export from nucleus;mRNA processing;mRNA splice site selection;nuclear mRNA 5'-splice site recognition;nuclear mRNA splicing, via spliceosome;termination of RNA polymerase II transcription;transcription from RNA polymerase II promoter;	catalytic step 2 spliceosome;cytoplasm;nuclear speck;nucleoplasm;nucleus;	mRNA processing factor		8	1	1	1
SHFM1	7979	P60896	26S proteasome complex subunit DSS1;SHFM1	57	SUBFAMILY NOT NAMED (PTHR16771:SF0)	peptidase activity;protein binding;	double-strand break repair via homologous recombination;proteolysis;	integrator complex;proteasome complex;			8	6	2	0
SKIV2L2	23517	P42285	Superkiller viralicidic activity 2-like 2;SKIV2L2	44	HELICASE SKI2W (PTHR11752:SF2)	ATP binding;ATP-dependent helicase activity;helicase activity;hydrolase activity, acting on acid anhydrides, in phosphorus-containing anhydrides;nucleic acid binding;nucleotide binding;protein binding;	RNA splicing;maturation of 5.8S rRNA;nuclear mRNA splicing, via spliceosome;	catalytic step 2 spliceosome;exosome (RNase complex);nucleolus;nucleus;	DNA helicase		0	0	0	0
SMARCC1	6599	Q92922	SWI/SNF complex subunit SMARCC1;SMARCC1	39	SWI/SNF-RELATED MATRIX-ASSOCIATED ACTIN-DEPENDENT REGULATOR OF CHROMATIN SUBFAMILY C MEMBER 1(SMARCC1) (PTHR12802:SF9)	DNA binding;chromatin binding;protein N-terminus binding;protein binding;transcription coactivator activity;	chromatin remodeling;insulin receptor signaling pathway;nervous system development;organ morphogenesis;positive regulation of transcription from RNA polymerase II promoter;positive regulation of transcription, DNA-dependent;regulation of transcription from RNA polymerase II promoter;	SWI/SNF complex;WINAC complex;XY body;intracellular;nBAF complex;npBAF complex;nucleolus;nucleoplasm;nucleus;soluble fraction;	transcription cofactor	Wnt signaling pathway->Switched/Sucrose Non Fermentation;;	18	2	2	1
SMC2	10592	O95347	Structural maintenance of chromosomes protein 2;SMC2	36	STRUCTURAL MAINTENANCE OF CHROMOSOMES SMC2 (PTHR18937:SF9)	ATP binding;nucleotide binding;protein binding;protein heterodimerization activity;	cell cycle;cell division;mitosis;mitotic chromosome condensation;symbiosis, encompassing mutualism through parasitism;	condensed chromosome;condensin complex;cytoplasm;nuclear chromosome;nucleus;	chromatin/chromatin-binding protein		6	1	0	0
SNRNP200	23020	O75643	small nuclear ribonucleoprotein 200kDa	67		ATP binding;ATP-dependent helicase activity;helicase activity;hydrolase activity;nucleic acid binding;nucleotide binding;protein binding;	RNA splicing;cis assembly of pre-catalytic spliceosome;gene expression;nuclear mRNA splicing, via spliceosome;	U5 snRNP;catalytic step 2 spliceosome;nucleolus;nucleoplasm;nucleus;spliceosomal complex;			0	0	0	0
SNRNP27	11017	Q8WVK2	U4/U6.U5 small nuclear ribonucleoprotein 27 kDa protein;SNRNP27	46		nucleic acid binding;	RNA splicing;biological_process;mRNA processing;	cellular_component;nucleus;			0	0	0	0
SNRNP70	6625	P08621	small nuclear ribonucleoprotein 70kDa (U1)	53		RNA binding;nucleotide binding;protein binding;	RNA splicing;gene expression;mRNA processing;nuclear mRNA splicing, via spliceosome;regulation of RNA splicing;	nucleoplasm;nucleus;spliceosomal complex;			6	1	0	0
SNRPD1	6632	P62314	Small nuclear ribonucleoprotein Sm D1;SNRPD1	67	SMALL NUCLEAR RIBONUCLEOPROTEIN SM D1 (PTHR23338:SF18)	RNA binding;protein binding;	RNA metabolic process;RNA splicing;gene expression;ncRNA metabolic process;nuclear mRNA splicing, via spliceosome;spliceosomal snRNP assembly;spliceosome assembly;	U12-type spliceosomal complex;catalytic step 2 spliceosome;cytoplasm;cytosol;nucleoplasm;nucleus;small nuclear ribonucleoprotein complex;	mRNA processing factor		2	0	0	0
SNRPD2	6633	P62316	small nuclear ribonucleoprotein D2 polypeptide 16.5kDa	69		protein binding;	RNA metabolic process;RNA splicing;gene expression;ncRNA metabolic process;nuclear mRNA splicing, via spliceosome;spliceosomal snRNP assembly;spliceosome assembly;	U12-type spliceosomal complex;catalytic step 2 spliceosome;cytosol;nucleoplasm;nucleus;small nuclear ribonucleoprotein complex;spliceosomal complex;			0	0	0	0
SNRPE	6635	P62304	Small nuclear ribonucleoprotein E;SNRPE	54	SUBFAMILY NOT NAMED (PTHR11193:SF0)	RNA binding;protein binding;	RNA metabolic process;RNA splicing;gene expression;histone mRNA metabolic process;mRNA processing;ncRNA metabolic process;nuclear mRNA splicing, via spliceosome;spliceosomal snRNP assembly;spliceosome assembly;termination of RNA polymerase II transcription;transcription from RNA polymerase II promoter;	U12-type spliceosomal complex;U7 snRNP;catalytic step 2 spliceosome;cytosol;nucleoplasm;nucleus;small nuclear ribonucleoprotein complex;spliceosomal complex;	mRNA processing factor		65	3	3	1
SNRPG	6637	P62308	small nuclear ribonucleoprotein polypeptide G	58		RNA binding;protein binding;	RNA metabolic process;RNA splicing;gene expression;histone mRNA metabolic process;mRNA processing;ncRNA metabolic process;nuclear mRNA splicing, via spliceosome;spliceosomal snRNP assembly;spliceosome assembly;termination of RNA polymerase II transcription;transcription from RNA polymerase II promoter;	U12-type spliceosomal complex;U7 snRNP;catalytic step 2 spliceosome;cytosol;nucleoplasm;nucleus;small nuclear ribonucleoprotein complex;spliceosomal complex;			1	0	0	1
SPINT2	10653	O43291	Kunitz-type protease inhibitor 2;SPINT2	47	KUNITZ-TYPE PROTEASE INHIBITOR 2 (PTHR10083:SF19)	endopeptidase inhibitor activity;serine-type endopeptidase inhibitor activity;	cellular component movement;negative regulation of endopeptidase activity;	cytoplasm;extracellular region;integral to membrane;membrane;soluble fraction;	serine protease inhibitor		80	6	24	6
SRRT	51593	Q9BXP5	serrate RNA effector molecule homolog	52		protein binding;	cell proliferation;gene silencing by RNA;primary miRNA processing;response to arsenic-containing substance;	cytoplasm;nucleoplasm;nucleus;			2	1	0	1
ST18	9705	O60284	Suppression of tumorigenicity protein 18;ST18	36	SUPPRESSION OF TUMORIGENICITY PROTEIN 18 (PTHR10816:SF9)	DNA binding;metal ion binding;sequence-specific DNA binding transcription factor activity;zinc ion binding;	negative regulation of transcription from RNA polymerase II promoter;	nucleus;	zinc finger transcription factor		6	2	0	0
STAG2	10735	Q8N3U4	Cohesin subunit SA-2;STAG2	48	SUBFAMILY NOT NAMED (PTHR11199:SF0)	protein binding;	M phase of mitotic cell cycle;cell division;meiosis;mitotic cell cycle;mitotic metaphase/anaphase transition;mitotic prometaphase;negative regulation of DNA endoreduplication;sister chromatid cohesion;	chromatin;chromosome;chromosome, centromeric region;nucleoplasm;nucleus;	chromatin/chromatin-binding protein		3	0	0	0
SUPT5H	6829	O00267	Transcription elongation factor SPT5;SUPT5H	63	SUBFAMILY NOT NAMED (PTHR11125:SF7)	enzyme binding;protein binding;protein heterodimerization activity;	cell cycle;chromatin remodeling;gene expression;mRNA capping;negative regulation of transcription elongation, DNA-dependent;negative regulation of transcription from RNA polymerase II promoter;positive regulation of transcription elongation from RNA polymerase II promoter;positive regulation of transcription elongation, DNA-dependent;positive regulation of transcription from RNA polymerase II pro…	nucleolus;nucleoplasm;nucleus;	transcription factor		1	0	0	0
SUPT6H	6830	Q7KZ85	Transcription elongation factor SPT6;SUPT6H	44	TRANSCRIPTION ELONGATION FACTOR SPT6 (PTHR10145:SF1)	RNA binding;hydrolase activity, acting on ester bonds;sequence-specific DNA binding transcription factor activity;	chromatin remodeling;nucleobase, nucleoside, nucleotide and nucleic acid metabolic process;regulation of transcription elongation, DNA-dependent;regulation of transcription from RNA polymerase II promoter;regulation of transcription, DNA-dependent;transcription, DNA-dependent;	nucleus;	transcription factor		1	0	0	0
TEKT2	27285	Q9UIF3	Tektin-2;TEKT2	45	TEKTIN 2 (PTHR19960:SF7)		cell projection organization;ciliary or flagellar motility;microtubule cytoskeleton organization;sperm motility;	actin cytoskeleton;cilium;cilium axoneme;cytoplasm;flagellar axoneme;flagellum;focal adhesion;microtubule;nucleolus;nucleus;plasma membrane;	non-motor microtubule binding protein		0	0	0	0
THOC4	10189	Q86V81	THO complex subunit 4;THOC4	64	RNA AND EXPORT FACTOR BINDING PROTEIN (PTHR19965:SF8)	RNA binding;nucleotide binding;protein binding;	RNA splicing;gene expression;interspecies interaction between organisms;intronless viral mRNA export from host nucleus;mRNA 3'-end processing;mRNA export from nucleus;nuclear mRNA splicing, via spliceosome;termination of RNA polymerase II transcription;transcription from RNA polymerase II promoter;transport;	catalytic step 2 spliceosome;cytoplasm;cytosol;nuclear speck;nucleolus;nucleoplasm;nucleus;transcription export complex;	RNA binding protein		5	1	1	0
TIE1	7075	P35590	Tyrosine-protein kinase receptor Tie-1;TIE1	48	SUBFAMILY NOT NAMED (PTHR24416:SF91)	ATP binding;nucleotide binding;protein binding;receptor activity;transmembrane receptor protein tyrosine kinase activity;	in utero embryonic development;mesoderm development;negative regulation of angiogenesis;negative regulation of cell migration;plasma membrane fusion;response to retinoic acid;signal transduction;vasculogenesis;	integral to plasma membrane;plasma membrane;	protein kinase		29	5	1	0
TIGD2	166815	Q4W5G0	Tigger transposable element-derived protein 2;TIGD2	38	JERKY (PTHR19303:SF13)	DNA binding;	regulation of transcription, DNA-dependent;	chromosome, centromeric region;nucleus;	centromere DNA-binding protein		0	0	0	0
TLR9	54106	Q9NR96	Toll-like receptor 9;TLR9	40	SUBFAMILY NOT NAMED (PTHR24373:SF58)	interleukin-1 receptor binding;protein binding;siRNA binding;transmembrane receptor activity;	I-kappaB phosphorylation;defense response to bacterium;fibroblast growth factor receptor signaling pathway;innate immune response;insulin receptor signaling pathway;maintenance of gastrointestinal epithelium;negative regulation of NF-kappaB transcription factor activity;negative regulation of interleukin-6 production;negative regulation of interleukin-8 production;negative regulation of toll-like…	apical plasma membrane;basolateral plasma membrane;cytoplasm;cytoplasmic vesicle;early phagosome;endoplasmic reticulum;endoplasmic reticulum membrane;endosome;endosome membrane;extracellular region;integral to membrane;lysosome;plasma membrane;	receptor	Toll receptor signaling pathway->Toll-like receptor 1, 2, 3, 4, 5, 6, 7, 8, 9, 10, 11, 12;;	381	18	7	6
TM7SF2	7108	O76062	Delta(14)-sterol reductase;TM7SF2	43	DELTA(14)-STEROL REDUCTASE (PTHR21257:SF15)	delta14-sterol reductase activity;oxidoreductase activity;	cholesterol biosynthetic process;	endoplasmic reticulum;endoplasmic reticulum membrane;integral to plasma membrane;membrane;	receptor		4	0	0	0
TMEM5	10329	Q9Y2B1	Transmembrane protein 5;TMEM5	41	SUBFAMILY NOT NAMED (PTHR15576:SF0)			integral to plasma membrane;membrane;			0	0	0	0
TMOD3	29766	Q9NYL9	Tropomodulin-3;TMOD3	41	TROPOMODULIN 3 (PTHR10901:SF10)	actin binding;tropomyosin binding;		cytoplasm;cytoskeleton;	non-motor actin binding protein		1	0	0	0
TRPV6	55503	Q9H1D0	Transient receptor potential cation channel subfamily V member 6;TRPV6	52	TRANSIENT RECEPTOR POTENTIAL CATION CHANNEL SUBFAMILY V MEMBER 6 (EPITHELIAL CALCIUM CHANNEL 2) (PTHR10582:SF1)	calcium channel activity;calmodulin binding;ion channel activity;	calcium ion transmembrane transport;calcium ion transport;ion transport;regulation of calcium ion-dependent exocytosis;transmembrane transport;	integral to plasma membrane;plasma membrane;	ion channel		52	6	1	6
TSG101	7251	Q99816	Tumor susceptibility gene 101 protein;TSG101	38	TUMOR SUSCEPTIBILITY GENE 101 PROTEIN (PTHR23306:SF10)	DNA binding;calcium-dependent protein binding;ligand-dependent nuclear receptor transcription coactivator activity;protein binding;transcription corepressor activity;ubiquitin binding;ubiquitin protein ligase binding;	cell cycle;cell cycle arrest;cell differentiation;cell division;cellular membrane organization;endosome transport;interspecies interaction between organisms;keratinocyte differentiation;negative regulation of cell proliferation;negative regulation of transcription, DNA-dependent;non-lytic virus budding;protein modification process;protein monoubiquitination;protein transport;regulation of cell gr…	cytoplasm;early endosome;endosome membrane;late endosome;late endosome membrane;multivesicular body;nucleolus;nucleus;plasma membrane;	ubiquitin-protein ligase		123	43	11	1
TUBA1B	10376	P68363	Tubulin alpha-1B chain;TUBA1B	66	TUBULIN ALPHA CHAIN (PTHR11588:SF10)	GTP binding;GTPase activity;nucleotide binding;protein binding;structural constituent of cytoskeleton;	'de novo' posttranslational protein folding;cellular protein metabolic process;microtubule cytoskeleton organization;microtubule-based movement;protein folding;protein polymerization;	cytoplasm;cytoskeleton;microtubule;	tubulin		1	0	0	0
TUBA1C	84790	Q9BQE3	Tubulin alpha-1C chain;TUBA1C	62	TUBULIN ALPHA CHAIN (PTHR11588:SF10)	GTP binding;GTPase activity;nucleotide binding;protein binding;structural molecule activity;	'de novo' posttranslational protein folding;cellular protein metabolic process;microtubule-based movement;protein folding;protein polymerization;	cytoplasm;cytoskeleton;microtubule;	tubulin		1	0	0	0
TUBGCP2	10844	Q9BSJ2	Gamma-tubulin complex component 2;TUBGCP2	42	GAMMA-TUBULIN COMPLEX COMPONENT 2 (GCP-2) (PTHR19302:SF13)	protein binding;	G2/M transition of mitotic cell cycle;microtubule nucleation;mitotic cell cycle;protein complex assembly;	centrosome;cytoplasm;cytoplasmic microtubule;cytoskeleton;cytosol;microtubule organizing center;spindle pole;	non-motor microtubule binding protein		1	0	0	0
TXK	7294	P42681	Tyrosine-protein kinase TXK;TXK	39	SUBFAMILY NOT NAMED (PTHR24418:SF263)	ATP binding;non-membrane spanning protein tyrosine kinase activity;nucleotide binding;	protein phosphorylation;	cytoplasm;	protein kinase		8	0	0	0
U2AF1	7307	Q01081	Splicing factor U2AF 35 kDa subunit;U2AF1	67	SUBFAMILY NOT NAMED (PTHR12620:SF0)	RNA binding;RS domain binding;metal ion binding;nucleotide binding;protein binding;zinc ion binding;	RNA splicing;gene expression;mRNA 3'-end processing;mRNA export from nucleus;mRNA processing;nuclear mRNA splicing, via spliceosome;termination of RNA polymerase II transcription;transcription from RNA polymerase II promoter;	Cajal body;catalytic step 2 spliceosome;nuclear speck;nucleoplasm;nucleus;spliceosomal complex;	ribonucleoprotein	mRNA splicing->U2AF65;;mRNA splicing->U2AF35;;;	12	1	0	1
U2AF2	11338	P26368	Splicing factor U2AF 65 kDa subunit;U2AF2	59	SPLICING FACTOR U2AF LARGE SUBUNIT (PTHR23139:SF9)	C2H2 zinc finger domain binding;RNA binding;enzyme binding;nucleotide binding;protein binding;	RNA splicing;gene expression;mRNA 3'-end processing;mRNA export from nucleus;mRNA processing;nuclear mRNA splicing, via spliceosome;termination of RNA polymerase II transcription;transcription from RNA polymerase II promoter;	nucleoplasm;nucleus;spliceosomal complex;	mRNA processing factor		2	0	0	0
UBA1	7317	P22314	Ubiquitin-like modifier-activating enzyme 1;UBA1	53	UBIQUITIN-LIKE MODIFIER-ACTIVATING ENZYME 1 (UBIQUITIN-ACTIVATING ENZYME E1) (PTHR10953:SF4)	ATP binding;ligase activity;nucleotide binding;protein binding;small protein activating enzyme activity;	cell death;protein modification process;		transfer/carrier protein	Ubiquitin proteasome pathway->Ubiquitin protein ligase E3;;Ubiquitin proteasome pathway->Ubiquitin activating enzyme E1;;;	7	1	0	0
UBB	7314	P0CG47	ubiquitin B	57		protein binding;	DNA damage response, signal transduction by p53 class mediator resulting in cell cycle arrest;DNA repair;G1/S transition of mitotic cell cycle;I-kappaB kinase/NF-kappaB cascade;JNK cascade;M/G1 transition of mitotic cell cycle;MyD88-dependent toll-like receptor signaling pathway;MyD88-independent toll-like receptor signaling pathway;RNA metabolic process;S phase of mitotic cell cycle;T cell recep…	cytoplasm;cytosol;endocytic vesicle membrane;endosome membrane;nucleoplasm;nucleus;plasma membrane;			14	1	1	0
USP39	10713	Q53GS9	U4/U6.U5 tri-snRNP-associated protein 2;USP39	64	SUBFAMILY NOT NAMED (PTHR24006:SF31)	metal ion binding;protein binding;ubiquitin thiolesterase activity;zinc ion binding;	RNA splicing;mRNA processing;spliceosome assembly;ubiquitin-dependent protein catabolic process;	intracellular;nucleus;	cysteine protease		1	0	0	0
VCP	7415	P55072	Transitional endoplasmic reticulum ATPase;VCP	63	CELL DIVISION CONTROL PROTEIN 48 AAA FAMILY PROTEIN (TRANSITIONAL ENDOPLASMIC RETICULUM ATPASE) (PTHR23077:SF18)	ATP binding;ATPase activity;hydrolase activity;identical protein binding;lipid binding;nucleotide binding;polyubiquitin binding;protein binding;protein complex binding;protein domain specific binding;protein phosphatase binding;	ATP catabolic process;DNA repair;ER to Golgi vesicle-mediated transport;ER-associated protein catabolic process;activation of caspase activity;aggresome assembly;double-strand break repair;endoplasmic reticulum unfolded protein response;establishment of protein localization;positive regulation of proteasomal ubiquitin-dependent protein catabolic process;positive regulation of protein catabolic pr…	cytoplasm;cytosol;endoplasmic reticulum;microsome;nucleolus;nucleus;proteasome complex;	transmembrane receptor regulatory/adaptor protein		97	10	1	3
VWCE	220001	Q96DN2	von Willebrand factor C and EGF domain-containing protein;VWCE	40	URG11 PROTEIN (PTHR11339:SF41)	calcium ion binding;		extracellular region;	signaling molecule		0	0	0	0
WBP11	51729	Q9Y2W2	WW domain-binding protein 11;WBP11	50	SUBFAMILY NOT NAMED (PTHR13361:SF3)	WW domain binding;protein binding;protein phosphatase type 1 regulator activity;single-stranded DNA binding;	RNA splicing;mRNA processing;rRNA processing;	cytoplasm;nuclear speck;nucleus;			0	0	0	0
WDR12	55759	Q9GZL7	WD repeat-containing protein 12;WDR12	41	WD40 REPEAT PROTEIN 12 (PTHR19855:SF11)	protein binding;	Notch signaling pathway;cell proliferation;maturation of 5.8S rRNA from tricistronic rRNA transcript (SSU-rRNA, 5.8S rRNA, LSU-rRNA);maturation of LSU-rRNA from tricistronic rRNA transcript (SSU-rRNA, 5.8S rRNA, LSU-rRNA);rRNA processing;ribosomal large subunit biogenesis;	PeBoW complex;nucleolus;nucleoplasm;nucleus;preribosome, large subunit precursor;			0	0	0	0
XAB2	56949	Q9HCS7	Pre-mRNA-splicing factor SYF1;XAB2	41	XPA-BINDING PROTEIN 2 (HCNP PROTEIN) (PTHR11246:SF5)	protein binding;	DNA repair;RNA splicing;blastocyst development;nuclear mRNA splicing, via spliceosome;nucleotide-excision repair;transcription, DNA-dependent;transcription-coupled nucleotide-excision repair;	catalytic step 2 spliceosome;intracellular;nucleoplasm;nucleus;	transcription factor		4	1	0	0
XBP1	7494	P17861	X-box-binding protein 1;XBP1	38	X BOX BINDING PROTEIN-1 (XBP-1) (TREB5 PROTEIN) (PTHR13301:SF14)	DNA binding;protein dimerization activity;sequence-specific DNA binding;sequence-specific DNA binding transcription factor activity;	epithelial cell maturation involved in salivary gland development;exocrine pancreas development;immune response;regulation of transcription, DNA-dependent;transcription, DNA-dependent;	nucleus;	transcription factor		104	15	1	2
ZNF207	7756	O43670	Zinc finger protein 207;ZNF207	48	SUBFAMILY NOT NAMED (PTHR23215:SF0)	DNA binding;metal ion binding;sequence-specific DNA binding transcription factor activity;zinc ion binding;	regulation of transcription, DNA-dependent;transcription, DNA-dependent;	intracellular;nucleolus;nucleus;	DNA binding protein		0	0	0	0
ZNF471	57573	Q9BX82	Zinc finger protein 471;ZNF471	40	SUBFAMILY NOT NAMED (PTHR24387:SF381)	DNA binding;metal ion binding;zinc ion binding;	regulation of transcription, DNA-dependent;	intracellular;nucleus;	KRAB box transcription factor		0	0	0	0
