# Supplementary material for: Essential Gene Profiles in Breast, Pancreatic, and Ovarian Cancer Cells
Source: Oxford University Press journal article supplement (doi:10.1158/2159-8290.cd-11-0224), 2011-12-29
Supplement: 21598290cd110224-sup-tab5c_xls_67kb.xlsx [file 21598290cd110224-sup-tab5c_xls_67kb.xlsx]

## Sheet: STable 5c
Supplemental Table 5: Genes selected for the siRNA followup experiment and the results.
Fast Dropouts
Gene	Cell Line	siRNA	shRNA	Hit-Hit	Hit-NoHit	NoHit-Hit	NoHit-NoHit
AQR	MB231	0.0471371	13	1	0	0	0	p<0.05
ARCN1	MB231	0.0471371	18	1	0	0	0	p<0.05
COPZ1	MB231	0.0471371	3	1	0	0	0	p<0.05
EIF3B	MB231	0.0471371	11	1	0	0	0
HNRNPC	MB231	0.0471371	62	1	0	0	0
PABPN1	MB231	0.0471371	58	1	0	0	0
POLR2D	MB231	0.0471371	252	1	0	0	0
POLR2E	MB231	0.0471371	2161	0	1	0	0
PSMA1	MB231	0.0471371	40	1	0	0	0
PSMB2	MB231	0.0471371	42	1	0	0	0
RAN	MB231	0.0471371	1	1	0	0	0
RPS17	MB231	0.0471371	90	1	0	0	0
SF3B2	MB231	0.0471371	48	1	0	0	0
SNRPD2	MB231	0.0471371	36	1	0	0	0
THOC1	MB231	0.0986473	12847	0	0	0	1
UBA1	MB231	0.266357	1438	0	0	0	1
VCP	MB231	0.0471371	2	1	0	0	0
AQR	MiaPaca	0.0489451	31	1	0	0	0
ARCN1	MiaPaca	0.0489451	660	1	0	0	0
COPZ1	MiaPaca	0.0489451	13079	0	1	0	0
EIF3B	MiaPaca	0.0489451	6	1	0	0	0
HNRNPC	MiaPaca	0.0489451	20	1	0	0	0
PABPN1	MiaPaca	0.473641	688	0	0	1	0
POLR2D	MiaPaca	0.0489451	38	1	0	0	0
POLR2E	MiaPaca	0.0489451	2599	0	1	0	0
PSMA1	MiaPaca	0.331545	48	0	0	1	0
PSMB2	MiaPaca	0.0489451	4	1	0	0	0
RAN	MiaPaca	0.0489451	3	1	0	0	0
RPS17	MiaPaca	0.0489451	28	1	0	0	0
SF3B2	MiaPaca	0.0489451	71	1	0	0	0
SNRPD2	MiaPaca	0.0489451	11	1	0	0	0
THOC1	MiaPaca	0.0489451	6901	0	1	0	0
UBA1	MiaPaca	0.0489451	1284	0	1	0	0
VCP	MiaPaca	0.252336	4152	0	0	0	1
AQR	KP4	0.0466199	8	1	0	0	0
ARCN1	KP4	0.0466199	30	1	0	0	0
COPZ1	KP4	0.0466199	239	1	0	0	0
EIF3B	KP4	0.0466199	68	1	0	0	0
HNRNPC	KP4	0.0466199	13	1	0	0	0
PABPN1	KP4	0.0466199	88	0	0	1	0
POLR2D	KP4	0.0466199	56	1	0	0	0
POLR2E	KP4	0.0466199	1028	0	1	0	0
PSMA1	KP4	0.0466199	65	1	0	0	0
PSMB2	KP4	0.0466199	14	1	0	0	0
RAN	KP4	0.0466199	39	1	0	0	0
RPS17	KP4	0.0466199	22	1	0	0	0
SF3B2	KP4	0.0718455	23	0	0	1	0
SNRPD2	KP4	0.0466199	55	1	0	0	0
THOC1	KP4	0.0545504	7812	0	0	0	1
UBA1	KP4	0.747426	5453	0	0	0	1
VCP	KP4	0.0466199	59	1	0	0	0
				36	6	4	5
				Hit-Hit	Hit-NoHit	NoHit-Hit	NoHit-NoHit
Slow Dropouts
Gene	Cell Line	siRNA	shRNA	Hit-Hit	Hit-NoHit	NoHit-Hit	NoHit-NoHit
ACTL6B	MB231	0.0471371	1897	0	1	0	0
ALDH1A3	MB231	0.0813245	4975	0	0	0	1
ANKFY1	MB231	0.0471371	562	1	0	0	0
APOBEC4	MB231	0.15466	10083	0	0	0	1
BRIX1	MB231	0.0986473	431	0	0	1	0
CCDC135	MB231	0.0471371	5137	0	1	0	0
CCDC58	MB231	0.0471371	9618	0	1	0	0
CSNK2B	MB231	0.0471371	3467	0	1	0	0
DEC1	MB231	0.796749	8736	0	0	0	1
EIF3F	MB231	0.0471371	4664	0	1	0	0
EPGN	MB231	0.917936	10102	0	0	0	1
EXOSC6	MB231	0.0795887	11723	0	0	0	1
GAR1	MB231	0.0471371	2496	0	1	0	0
HLA-DQA1	MB231	0.0471371	15094	0	1	0	0
LCLAT1	MB231	0.254712	13659	0	0	0	1
MMP2	MB231	NA	4303	0	0	0	0
NDUFA1	MB231	0.15466	6817	0	0	0	1
NPIP	MB231	0.328349	1664	0	0	0	1
NPM1	MB231	0.423051	7019	0	0	0	1
NUP35	MB231	0.120796	14693	0	0	0	1
PPP1R3B	MB231	0.0813245	10428	0	0	0	1
PTPRG	MB231	0.796749	15850	0	0	0	1
RAB11B	MB231	0.254712	2394	0	0	0	1
RNF128	MB231	0.957855	9907	0	0	0	1
RNF152	MB231	0.0471371	6136	0	1	0	0
SAMM50	MB231	0.0471371	8643	0	1	0	0
SERPINA3	MB231	0.1488	9212	0	0	0	1
ST3GAL3	MB231	0.127704	598	0	0	1	0
SUPT16H	MB231	0.517606	1720	0	0	0	1
TMEM47	MB231	0.0471371	8737	0	1	0	0
TMF1	MB231	0.0471371	7038	0	1	0	0
TNKS2	MB231	0.820866	5998	0	0	0	1
UBOX5	MB231	0.254712	4737	0	0	0	1
ACTL6B	MiaPaca	0.686423	1373	0	0	0	1
ALDH1A3	MiaPaca	0.338285	2985	0	0	0	1
ANKFY1	MiaPaca	0.0489451	872	0	1	0	0
APOBEC4	MiaPaca	0.237895	10027	0	0	0	1
BRIX1	MiaPaca	0.291587	1600	0	0	0	1
CCDC135	MiaPaca	0.0489451	13308	0	1	0	0
CCDC58	MiaPaca	0.0489451	976	0	1	0	0
CSNK2B	MiaPaca	0.0489451	8828	0	0	0	1
DEC1	MiaPaca	0.0489451	10899	0	1	0	0
EIF3F	MiaPaca	0.082841	3500	0	0	0	1
EPGN	MiaPaca	0.174915	10766	0	0	0	1
EXOSC6	MiaPaca	0.0489451	564	1	0	0	0
GAR1	MiaPaca	0.267345	361	0	0	1	0
HLA-DQA1	MiaPaca	0.0496679	6752	0	1	0	0
LCLAT1	MiaPaca	0.897729	3532	0	0	0	1
MMP2	MiaPaca	0.291587	1599	0	0	0	1
NDUFA1	MiaPaca	0.499665	4422	0	0	0	1
NPIP	MiaPaca	0.499665	5410	0	0	0	1
NPM1	MiaPaca	0.166327	10628	0	0	0	1
NUP35	MiaPaca	0.183173	9152	0	0	0	1
PPP1R3B	MiaPaca	0.0489451	12337	0	0	0	1
PTPRG	MiaPaca	0.279295	5971	0	0	0	1
RAB11B	MiaPaca	0.0489451	2832	0	1	0	0
RNF128	MiaPaca	0.0530204	5207	0	0	0	1
RNF152	MiaPaca	0.0489451	7905	0	1	0	0
SAMM50	MiaPaca	0.0489451	1266	0	0	0	1
SERPINA3	MiaPaca	0.237895	1311	0	0	0	1
ST3GAL3	MiaPaca	0.507617	1587	0	0	0	1
SUPT16H	MiaPaca	0.510127	2518	0	0	0	1
TMEM47	MiaPaca	0.18781	2290	0	0	0	1
TMF1	MiaPaca	0.0489451	2501	0	0	0	1
TNKS2	MiaPaca	0.061368	5546	0	0	0	1
UBOX5	MiaPaca	0.061368	9084	0	0	0	1
ACTL6B	KP4	0.0592439	3001	0	0	0	1
ALDH1A3	KP4	0.763747	3562	0	0	0	1
ANKFY1	KP4	0.580541	1699	0	0	0	1
APOBEC4	KP4	0.0466199	10927	0	1	0	0
BRIX1	KP4	0.0466199	258	1	0	0	0
CCDC135	KP4	0.658415	6155	0	0	0	1
CCDC58	KP4	0.0466199	2852	0	1	0	0
CSNK2B	KP4	0.0466199	9395	0	1	0	0
DEC1	KP4	0.755611	8839	0	0	0	1
EIF3F	KP4	0.311802	1418	0	0	0	1
EPGN	KP4	0.0963518	6451	0	0	0	1
EXOSC6	KP4	0.0466199	3147	0	1	0	0
GAR1	KP4	0.0466199	142	1	0	0	0
HLA-DQA1	KP4	0.175733	7287	0	0	0	1
LCLAT1	KP4	0.771848	2522	0	0	0	1
MMP2	KP4	0.0963518	1547	0	0	0	1
NDUFA1	KP4	0.0466199	4618	0	1	0	0
NPIP	KP4	0.933998	3273	0	0	0	1
NPM1	KP4	0.0963518	8485	0	0	0	1
NUP35	KP4	0.0466199	4886	0	0	0	1
PPP1R3B	KP4	0.063198	11748	0	0	0	1
PTPRG	KP4	0.0466199	11401	0	1	0	0
RAB11B	KP4	0.0478351	3150	0	1	0	0
RNF128	KP4	0.0718455	589	0	0	1	0
RNF152	KP4	0.0466199	11740	0	1	0	0
SAMM50	KP4	0.0466199	1801	0	0	0	1
SERPINA3	KP4	0.543018	3112	0	0	0	1
ST3GAL3	KP4	0.79609	8947	0	0	0	1
SUPT16H	KP4	0.0466199	1344	0	0	0	1
TMEM47	KP4	0.941049	4498	0	0	0	1
TMF1	KP4	0.0466199	11624	0	0	0	1
TNKS2	KP4	0.498648	13848	0	0	0	1
UBOX5	KP4	0.311802	9286	0	0	0	1
				4	26	4	64
				Hit-Hit	Hit-NoHit	NoHit-Hit	NoHit-NoHit
